# Supplementary material for: Transcriptome Analyses of the Honeybee Response to Nosema ceranae and Insecticides
Source: PLoS One. 2014 Mar 19;9(3):e91686. doi: 10.1371/journal.pone.0091686 (PMC3960157; doi:10.1371/journal.pone.0091686)
Supplement: Table S2 — Honeybee genes detected in honeybees exposed to no treatment (Ct), N. ceranae (Ncer), fipronil (Fip), or a N. ceranae -fipronil (Nc+F) at day 1 (D1) or 7 (D7). The table gives the normalized counts for each sample together with the mean log2 of replicates for each condition and the log2 fold changes (and adjusted p-value in parenthesis) for each pairwise comparison. (XLSX) [file pone.0091686.s005.xlsx]

## Sheet: data
Locus	Product	Normalized countfor each sample (DESeq normalization)															Mean of replicates log2(count) (DESeq normalization and variance correction)								log2(Fold Change) and adjusted p-value
		D1 Ct A	D1 Ct B	D1 Ncer A	D1 Ncer B	D1 Fip A	D1 Fip B	D1 Nc+F A	D1 Nc+F B	D7 Ct A	D7 Ct B	D7 Ncer A	D7 Ncer B	D7 Fip A	D7 Fip B	D7 Nc+F	D1 Ct	D1 Ncer	D1 Fip	D1 Nc+F	D7 Ct	D7 Ncer	D7 Fip	D7 Nc+F	D1 Ncer/Ct		D1 Fip/Ct		D1 Nc+F/Ct		D1 Fip/Ncer		D1 Nc+F/Ncer		D1 Nc+F/Fip		D7 Ncer/Ct		D7 Fip/Ct		D7 Nc+F/Ct		D7 Fip/Ncer		D7 Nc+F/Ncer		D7 Nc+F/Fip
SsRbeta #1 (LOC724079)	signal sequence receptor beta	1.00704	3.04604	0.91102	1.7302	5.21909	0.964869	4.86844	3.65536	0	0.881117	0	3.13464	1.18641	2.84564	0	2.26537	1.32619	3.91982	4.26193	0.445584	1.56733	2.16245		-0.617811	(1)	0.609515	(1)	1.07248	(1)	1.22733	(1)	1.69029	(1)	0.462966	(1)	1.8309	(1)	2.19411	(1)			0.363213	(1)
LOC413242	bifunctional heparan sulfate	1397.77	1849.71	1018.52	1274.29	1623.14	1254.33	1569.59	1442.96	3024.77	3237.22	1389.81	1682.26	1738.09	1780.42	1265.68	1623.74	1146.47	1438.73	156.274	313.996	1536.33	1759.26	1265.68	-0.502198	(1)	-0.174518	(1)	-0.108337	(1)	0.327681	(1)	0.393862	(1)	0.066181	(1)	-1.02741	(0.000)	-0.831657	(0.012)	-1.30671	(0.000)	0.195756	(1)	-0.2793	(1)	-0.475056	(1)
LOC100577627		181.267	245.206	126.632	176.481	210.503	169.817	194.738	182.768	262.234	213.23	63.5341	174.495	118.641	112.877	92.0945	213.236	151.556	19.1619	188.753	237.732	119.146	115.759	92.9449	-0.492601	(1)	-0.165238	(1)	-0.175954	(1)	0.327363	(1)	0.316647	(1)	-0.010716	(1)	-0.998199	(0.756)	-1.03821	(0.587)	-1.36815	(0.667)	-0.0400142	(1)	-0.369951	(1)	-0.329937	(1)
LOC100578555		0	0	0	0	0	0	0	0	0	0	0	1.04488	0	0	0						0.522443
LOC410246	netrin receptor UNC5B-like	0	0.76151	0.91102	0.865101	0	0	0	0	1.00859	0	1.58835	0	0	0	1.24452	0.387548	0.888637			0.542961	0.794176		1.24452	1.2218	(1)											0.655188	(1)			1.30325	(1)			0.648059	(1)
LOC100579012		0	0	0	0	0	0	0	0	0	0	1.58835	0	0	0	0						0.794176
LOC100579044		0	0	0	0	0	0	0	0	0	0	0	0	0	0	0
LOC100576078		0	0	0	0	0.869849	0	0	0	0	0	0	0	1.18641	0	0			0.434924				0.593242
LOC408304	nuclear migration protein nudC-like	1406.83	1082.11	1175.22	1064.94	1081.22	1188.72	1087.61	1122.2	1235.53	1156.03	1434.28	1128.47	1150.82	1082.29	1273.14	1244.47	112.774	1134.97	114.935	1195.78	1281.38	1116.55	1273.14	-0.15193	(1)	-0.132874	(1)	-0.171608	(1)	0.0190562	(1)	-0.0196782	(1)	-0.0387344	(1)	0.0997478	(1)	-0.0988933	(1)	0.0904494	(1)	-0.198641	(1)	-0.00929847	(1)	0.189343	(1)
LOC100576134	hypothetical protein LOC100576134	69.4855	80.72	61.9493	90.8356	54.8005	46.3137	52.5792	80.418	260.217	212.349	181.072	220.47	209.994	168.841	327.309	75.1277	76.3925	5.55795	66.4986	236.283	2.77945	189.418	327.389	0.0245645	(1)	-0.570952	(1)	-0.175542	(1)	-0.595517	(1)	-0.200107	(1)	0.39541	(1)	-0.234965	(1)	-0.318944	(1)	0.470137	(1)	-0.0839785	(1)	0.705102	(1)	0.78908	(1)
SP38 (LOC410245)	prothrombin	52.3659	57.1132	71.9706	52.7712	52.1909	56.9273	56.4739	70.3658	70.6015	63.4404	52.4156	70.007	84.235	83.4721	64.715	54.7396	62.3786	54.5591	63.4198	67.2934	61.2113	83.8536	64.7155	0.188288	(1)	-0.00476387	(1)	0.212351	(1)	-0.193052	(1)	0.0240622	(1)	0.217114	(1)	-0.130814	(1)	0.32326	(1)	-0.0505105	(1)	0.454074	(1)	0.0803032	(1)	-0.373771	(1)
LOC410244	hypothetical protein LOC410244 (>1 isoforms)	141.992	104.327	110.233	106.407	133.087	131.222	121.711	101.436	135.151	134.811	115.95	130.61	136.437	149.87	146.853	123.159	18.3245	132.155	111.574	134.981	123.28	143.154	146.853	-0.185223	(1)	0.101698	(1)	-0.142531	(1)	0.286921	(1)	0.042692	(1)	-0.244229	(1)	-0.13082	(1)	0.0848072	(1)	0.121619	(1)	0.215628	(1)	0.252439	(1)	0.0368117	(1)
LOC724498	hypothetical protein LOC724498	2296.04	1976.12	2134.52	2144.59	1964.12	2283.85	2128.48	1933.69	1631.9	1556.05	1246.86	1395.96	1465.21	1499.65	1453.6	2136.82	2139.55	2123.98	231.853	1593.98	1321.48	1482.43	1453.6	0.00234311	(1)	-0.0081944	(1)	-0.072715	(1)	-0.0105375	(1)	-0.0750581	(1)	-0.0645206	(1)	-0.270555	(1)	-0.104664	(1)	-0.133001	(1)	0.165891	(1)	0.137554	(1)	-0.0283375	(1)
unc5-1 (LOC408264)	netrin receptor UNC5C	11.0774	7.6151	15.4873	12.9765	9.56834	9.64869	13.6316	10.0523	21.1804	17.6223	12.7068	16.7181	32.033	9.48547	29.8685	9.34625	14.2319	9.68514	11.8419	19.4139	14.7125	2.75925	29.8685	0.606672	(1)	0.0399259	(1)	0.341447	(1)	-0.566746	(1)	-0.265225	(1)	0.301521	(1)	-0.399122	(1)	0.0975943	(1)	0.622464	(1)	0.496717	(1)	1.02159	(1)	0.52487	(1)
LOC100578663	hypothetical protein LOC100578663	2.01407	4.56906	0	0.865101	0.869849	0	0	0	0	0.881117	15.8835	0	3.55923	2.84564	4.97808	3.29157	0.432555	0.434924		0.445584	7.94176	3.22433	4.97887	-2.92783	(1)	-2.91994	(1)			0.00789609	(1)					4.17205	(1)	2.86176	(1)	3.49818	(1)	-1.31029	(1)	-0.673869	(1)	0.636421	(1)
LOC100578623	hypothetical protein LOC100578623	0	0	0	0	0	0	0	0.913841	0	0	0	0	0	0.948547	1.24452				0.456926			0.474273	1.24452																							1.3918	(1)
Knr (LOC724640)	hypothetical protein LOC724640	69.4855	63.9668	102.945	22.4926	71.3276	19.2974	74.974	48.4336	91.7819	75.7761	100.066	82.5456	134.064	109.083	164.277	66.7262	62.7189	45.3125	61.7379	83.779	91.3586	121.574	164.277	-0.0893516	(1)	-0.558344	(1)	-0.112893	(1)	-0.468992	(1)	-0.0235417	(1)	0.44545	(1)	0.124119	(1)	0.537169	(1)	0.971467	(1)	0.41305	(1)	0.847348	(1)	0.434299	(1)
LOC100578783	hypothetical protein LOC100578783	7.04925	7.6151	6.37714	0.865101	4.34924	3.85948	3.89475	2.74152	7.06015	4.40558	9.53011	1.04488	15.4233	7.58838	9.95616	7.33218	3.62112	4.14362	3.31814	5.73286	5.2875	11.5584	9.95616	-1.01781	(1)	-0.837084	(1)	-1.14387	(1)	0.180722	(1)	-0.126062	(1)	-0.306783	(1)	-0.116672	(1)	1.00504	(1)	0.796333	(1)	1.12171	(1)	0.913005	(1)	-0.208705	(1)
LOC100577172		0	0	0	0	0.869849	0	0	0	0	0	0	0	0	0	0			0.434924
LOC100577201	hypothetical protein LOC100577201	0	0.76151	0.91102	0	0	0	0.973688	0.913841	1.00859	1.76223	0	0	0	0.948547	0	0.387548	0.455598		0.943765	1.38541		0.474273		0.25862	(1)			1.30957	(1)			1.05095	(1)					-1.54653	(1)
LOC100577301		0	0	1.82204	0	0	0	0.973688	0.913841	1.00859	0.881117	3.1767	1.04488	2.37282	0.948547	11.2007		0.911197		0.943765	0.944855	2.11792	1.66682	11.2682									0.050945	(1)			1.15962	(1)	0.813612	(1)	3.56735	(1)	-0.346009	(1)	2.40773	(1)	2.75374	(1)
Eg (LOC724765)	hypothetical protein LOC724765	88.6192	100.519	115.7	54.5014	145.265	44.384	122.685	88.6426	83.7132	90.755	142.952	62.6928	149.487	153.665	184.189	94.5692	85.1433	94.8244	15.6637	87.235	12.8222	151.576	184.189	-0.152204	(1)	0.00388688	(1)	0.160036	(1)	0.156091	(1)	0.312241	(1)	0.15615	(1)	0.237188	(1)	0.797078	(1)	1.07822	(1)	0.559889	(1)	0.841034	(1)	0.281145	(1)
LOC100577326		6.04222	12.1842	6.37714	3.4604	13.9176	3.85948	13.6316	7.31073	18.1547	9.69229	11.1185	7.31416	18.9825	17.0738	11.2007	9.11319	4.91877	8.88853	1.47118	13.9235	9.21631	18.2819	11.2682	-0.889658	(1)	-0.0360109	(1)	0.200397	(1)	0.853647	(1)	1.09005	(1)	0.236408	(1)	-0.595257	(1)	0.372735	(1)	-0.313933	(1)	0.967993	(1)	0.281325	(1)	-0.686668	(1)
LOC100577276		4.02815	1.52302	4.5551	4.32551	1.7397	1.92974	3.89475	2.74152	9.07733	5.2867	3.1767	6.26928	8.30486	3.79419	4.97808	2.77558	4.44318	1.83472	3.31814	7.18216	4.72299	6.49524	4.97887	0.677867	(1)	-0.597232	(1)	0.257584	(1)	-1.2751	(1)	-0.420284	(1)	0.854816	(1)	-0.604687	(1)	-0.247567	(1)	-0.528799	(1)	0.35712	(1)	0.0758882	(1)	-0.281232	(1)
LOC100577772	hypothetical protein LOC100577772	3.02111	0.76151	0	0	0.869849	0	4.86844	0	4.03437	1.76223	6.35341	1.04488	4.74563	2.84564	2.48904	1.89139		0.434924	2.43423	2.89831	3.69914	3.79564	2.48944			-2.12055	(1)	0.364075	(1)					2.48462	(1)	0.351984	(1)	0.389134	(1)	-0.219618	(1)	0.0371505	(1)	-0.571602	(1)	-0.608752	(1)
LOC100577837	hypothetical protein LOC100577837 (>1 isoforms)	0	0	0	0	0	0.964869	0	0	0	1.76223	0	1.04488	1.18641	0	0			0.482435		0.881117	0.522443	0.593242														-0.754067	(1)	-0.570805	(1)			0.183263	(1)
Knrl (LOC412475)	knirps-related protein	9.06333	17.5147	12.7543	8.65101	15.6573	8.68382	21.4211	9.13841	9.07733	9.69229	12.7068	13.5834	5.93204	16.1253	26.1349	13.2892	1.72644	12.1755	15.2798	9.38488	13.1451	11.2867	26.1349	-0.312268	(1)	-0.126841	(1)	0.201388	(1)	0.185427	(1)	0.513656	(1)	0.328229	(1)	0.486129	(1)	0.23286	(1)	1.47758	(1)	-0.25327	(1)	0.99145	(1)	1.24472	(1)
LOC412476	BTB/POZ domain-containing protein 19-like	99.6966	113.465	95.6571	92.5658	94.8135	116.749	117.816	99.6087	141.203	120.713	206.486	121.206	167.284	169.79	126.941	16.5877	94.1114	15.7813	18.7125	13.958	163.846	168.537	126.942	-0.179505	(1)	-0.010862	(1)	0.0285705	(1)	0.168643	(1)	0.208076	(1)	0.0394325	(1)	0.323236	(1)	0.363959	(1)	-0.044945	(1)	0.0407232	(1)	-0.368181	(1)	-0.408904	(1)
LOC724485	probable small nuclear ribonucleoprotein E-like	403.822	328.972	351.654	365.073	301.838	363.756	333.001	347.26	323.758	341.873	505.096	369.888	354.736	352.859	413.181	366.397	358.363	332.797	34.1353	332.816	437.492	353.798	413.187	-0.031985	(1)	-0.138767	(1)	-0.107319	(1)	-0.106782	(1)	-0.0753337	(1)	0.0314478	(1)	0.394532	(1)	0.0882014	(1)	0.312049	(1)	-0.306331	(1)	-0.0824831	(1)	0.223848	(1)
LOC724285	hypothetical protein LOC724285	2.01407	4.56906	8.19918	8.65101	1.7397	5.78921	1.94738	9.13841	9.07733	1.76223	4.76506	4.17952	4.74563	3.79419	0	3.29157	8.42594	3.76446	5.54289	5.41978	4.47229	4.26991		1.35592	(1)	0.193668	(1)	0.751866	(1)	-1.16225	(1)	-0.604053	(1)	0.558198	(1)	-0.277221	(1)	-0.344029	(1)			-0.0668075	(1)
LOC413509	choline transporter-like protein 1-like	7211.39	6242.09	5657.43	5595.47	6162.01	5477.56	5728.21	5345.97	2155.36	2194.86	2225.28	2425.17	1178.1	1969.18	1884.2	6726.74	5626.45	5819.79	5537.9	2175.11	2325.22	1573.64	1884.24	-0.257682	(1)	-0.208942	(1)	-0.28078	(1)	0.0487403	(1)	-0.0230978	(1)	-0.0718381	(1)	0.0962803	(1)	-0.466981	(1)	-0.207135	(1)	-0.563261	(0.381)	-0.303415	(1)	0.259846	(1)
LOC413510	hypothetical protein LOC413510	422.955	525.442	394.472	507.814	411.439	449.629	422.581	406.659	585.992	510.167	287.492	541.248	409.311	404.081	496.564	474.198	451.143	43.5337	414.623	548.794	414.37	46.6959	496.564	-0.0719064	(1)	-0.139365	(1)	-0.193701	(1)	-0.0674582	(1)	-0.121795	(1)	-0.0543365	(1)	-0.403466	(1)	-0.430434	(1)	-0.142406	(1)	-0.0269686	(1)	0.261059	(1)	0.288028	(1)
LOC100576301		1.00704	0	0.91102	0.865101	1.7397	0	0	0	0	0	0	0	0	0	0	0.535182	0.888637	0.869849						0.818614	(1)	0.788721	(1)			-0.029893	(1)
fz2 (LOC413820)	frizzled-2 isoform 1	2667.64	2427.69	2134.52	2222.44	2137.22	2139.11	2440.06	2353.14	2048.45	1608.04	2088.68	2105.43	1926.73	1885.71	1744.82	2547.67	2178.48	2138.17	2396.62	1828.24	297.584	196.219	1744.82	-0.225853	(1)	-0.252802	(1)	-0.0881859	(1)	-0.0269488	(1)	0.137667	(1)	0.164616	(1)	0.197908	(1)	0.060255	(1)	-0.0673831	(1)	-0.137653	(1)	-0.265291	(1)	-0.127638	(1)
LOC100576247	hypothetical protein LOC100576247	16.1126	18.2762	12.7543	19.0322	8.69849	14.473	14.6053	6.39689	7.06015	4.40558	15.8835	8.35904	5.93204	0	9.95616	17.1945	15.8932	11.5858	1.51168	5.73286	12.1213	2.96629	9.95616	-0.113525	(1)	-0.569586	(1)	-0.711398	(1)	-0.456061	(1)	-0.597873	(1)	-0.141812	(1)	1.08021	(1)	-0.950728	(1)	0.796333	(1)	-2.03094	(1)	-0.283881	(1)	1.74706	(1)
LOC100579039	hypothetical protein LOC100579039	67.4714	76.9125	42.8179	54.5014	56.5402	53.0678	54.5265	43.8644	51.4382	34.3636	49.2389	34.4811	21.3554	16.1253	12.4452	72.192	48.6596	54.8399	49.1955	42.9889	41.86	18.7432	12.4452	-0.569112	(1)	-0.397557	(1)	-0.553313	(1)	0.171555	(1)	0.0157994	(1)	-0.155756	(1)	-0.0354356	(1)	-1.19486	(1)	-1.78542	(0.954)	-1.15943	(0.793)	-1.74998	(1)	-0.590556	(1)
LOC100578969	hypothetical protein LOC100578969	18.1267	40.36	18.2204	25.953	15.6573	9.64869	24.3422	21.9322	7.06015	6.16782	1.58835	6.26928	2.37282	1.89709	1.24452	29.2433	22.8671	12.653	23.1372	6.61398	3.92882	2.13496	1.24452	-0.404929	(1)	-1.20863	(1)	-0.337894	(1)	-0.803701	(1)	0.0670355	(1)	0.870736	(1)	-0.751424	(1)	-1.63131	(1)	-2.40993	(1)	-0.879889	(1)	-1.65851	(1)	-0.778616	(1)
LOC100578840	hypothetical protein LOC100578840	8.05629	6.85359	7.28816	11.2463	11.308	10.6136	7.78951	10.9661	16.1375	14.0979	14.2952	12.5386	20.1689	9.48547	12.4452	7.45494	9.26724	1.96797	9.37782	15.1177	13.4169	14.8273	12.4452	0.313943	(1)	0.556084	(1)	0.331053	(1)	0.242142	(1)	0.0171105	(1)	-0.225031	(1)	-0.172188	(1)	-0.0279893	(1)	-0.280646	(1)	0.144199	(1)	-0.108458	(1)	-0.252657	(1)
LOC724542	cirhin-like	344.406	312.98	328.878	278.563	330.543	338.669	297.949	357.312	423.609	448.488	373.263	417.952	364.227	353.808	448.027	328.693	33.7232	334.658	327.633	436.487	395.674	359.177	448.273	-0.113999	(1)	0.0257197	(1)	-0.00467411	(1)	0.139719	(1)	0.109325	(1)	-0.0303938	(1)	-0.140419	(1)	-0.280434	(1)	0.0390976	(1)	-0.140015	(1)	0.179517	(1)	0.319532	(1)
LOC408303	glutamate [NMDA] receptor-associated protein	4610.21	4423.61	4271.77	3995.9	4340.55	3947.28	4028.15	4636.83	3815.5	4179.14	3769.16	4098.02	3062.12	3336.04	3701.2	4516.91	4133.84	4143.91	4332.49	3997.33	3933.6	3199.8	371.233	-0.127855	(1)	-0.124343	(1)	-0.0601403	(1)	0.0035122	(1)	0.0677149	(1)	0.0642027	(1)	-0.0231867	(1)	-0.321376	(1)	-0.111039	(1)	-0.29819	(1)	-0.0878523	(1)	0.210337	(1)
Rab10 (LOC410241)	ras-related protein Rab-10 (>1 isoforms)	1354.46	1286.95	1382.02	1362.53	1285.64	1296.78	1358.3	1185.25	1208.29	1215.06	1165.85	1134.74	1109.29	1165.76	1230.83	132.776	1372.28	1291.21	1271.77	1211.68	115.295	1137.53	123.835	0.055259	(1)	-0.0325871	(1)	-0.0544692	(1)	-0.0878462	(1)	-0.109728	(1)	-0.0218821	(1)	-0.0750008	(1)	-0.0911029	(1)	0.0226271	(1)	-0.0161022	(1)	0.0976279	(1)	0.11373	(1)
LOC408305	uridine-cytidine kinase-like 1-like	1016.1	932.849	822.651	824.441	867.239	868.382	844.188	795.956	1263.77	1277.62	1440.64	1229.82	1418.94	1291.92	1365.24	974.475	823.546	867.817	82.7172	127.693	1335.23	1355.43	1365.24	-0.242775	(1)	-0.167244	(1)	-0.248874	(1)	0.0755311	(1)	-0.00609921	(1)	-0.0816303	(1)	0.0714728	(1)	0.0931382	(1)	0.103538	(1)	0.0216654	(1)	0.0320652	(1)	0.0103998	(1)
LOC410247	hypothetical protein LOC410247	22.1548	15.9917	61.0383	14.7067	7.82864	16.4028	16.5527	10.0523	27.232	31.7202	22.2369	30.3015	331.008	16.1253	17.4233	19.7325	37.8725	12.1158	13.3248	29.477	26.2692	173.567	17.4233	0.989601	(1)	-0.654672	(1)	-0.519856	(1)	-1.64427	(1)	-1.50946	(1)	0.134816	(1)	-0.166172	(1)	2.55787	(1)	-0.758529	(1)	2.72404	(1)	-0.592357	(1)	-3.3164	(1)
Nhe2 (LOC408306)	sodium/hydrogen exchanger 3	123.865	153.063	111.144	192.052	160.052	115.784	146.053	147.128	366.119	261.692	152.482	211.066	288.297	195.401	232.725	138.464	151.598	137.918	146.598	313.953	181.774	241.849	232.725	0.130739	(1)	-0.00570245	(1)	0.0822793	(1)	-0.136441	(1)	-0.0484597	(1)	0.0879817	(1)	-0.788185	(1)	-0.376223	(1)	-0.431702	(1)	0.411962	(1)	0.356484	(1)	-0.0554783	(1)
LOC100578590		0	0	0	0	0	0	0	0	0	0	0	0	0	0	0
LOC100578068	hypothetical protein LOC100578068	352.463	676.221	287.882	519.061	589.758	374.369	375.844	406.659	474.038	306.629	195.367	281.073	250.332	158.407	75.9157	514.342	43.4714	482.634	391.252	39.3335	238.227	24.3697	75.9157	-0.35026	(1)	-0.0935042	(1)	-0.394631	(1)	0.256756	(1)	-0.0443702	(1)	-0.301126	(1)	-0.712412	(1)	-0.933526	(1)	-2.36224	(0.548)	-0.221113	(1)	-1.64982	(1)	-1.42871	(1)
Mir316 (LOC100315684)	ame-miR-316	0	0	0	0	0	0	0	0	0	0	0	0	0	0	0
LOC724683	hypothetical protein LOC724683 (>1 isoforms)	769.376	862.79	808.074	934.309	612.374	755.492	831.53	785.903	2035.34	1608.92	1329.45	1369.84	1993.17	1778.53	1255.72	816.832	871.192	683.933	88.7166	1822.13	1349.64	1885.85	1255.73	0.0942743	(1)	-0.254861	(1)	-0.0130818	(1)	-0.349135	(1)	-0.107356	(1)	0.241779	(1)	-0.433046	(0.955)	0.0495864	(1)	-0.537109	(1)	0.482632	(0.726)	-0.104064	(1)	-0.586696	(1)
LOC413464	tyrosine-protein kinase Src64B-like	181.267	141.641	157.606	181.671	147.874	167.887	183.053	146.215	247.105	214.111	222.369	204.797	263.383	160.304	245.17	161.454	169.639	157.888	164.634	23.6824	213.583	211.844	245.175	0.071346	(1)	-0.0322849	(1)	0.028142	(1)	-0.103631	(1)	-0.043204	(1)	0.0604269	(1)	-0.110648	(1)	-0.122445	(1)	0.0883412	(1)	-0.0117971	(1)	0.198989	(1)	0.210786	(1)
LOC409920	ubiquitin-conjugating enzyme E2 variant 2-like	1297.06	1168.92	1090.49	1031.2	1209.09	1236.96	1150.9	1262.93	1141.73	1236.21	1188.09	1215.2	1001.33	1082.29	1186.03	1233	16.8456	1223.26	126.914	1188.97	121.642	141.813	1186.28	-0.216947	(1)	-0.0117061	(1)	-0.0308383	(1)	0.205241	(1)	0.186108	(1)	-0.0191321	(1)	0.0152984	(1)	-0.190616	(1)	-0.00357052	(1)	-0.205914	(1)	-0.0188689	(1)	0.187045	(1)
Cyc1 (LOC413605)	cytochrome c1, heme protein, mitochondrial	2119.81	1909.1	2118.12	1823.63	2063.28	2064.82	2009.69	1964.76	2166.46	2349.94	2233.22	2276.79	1964.69	2195.89	1957.63	214.458	197.877	264.56	1987.23	2258.2	2255.86	28.2891	1957.63	-0.0315542	(1)	0.0350865	(1)	-0.0196361	(1)	0.0666407	(1)	0.011918	(1)	-0.0547227	(1)	-0.00203863	(1)	-0.118388	(1)	-0.206063	(1)	-0.116349	(1)	-0.204025	(1)	-0.0876758	(1)
tral (LOC410015)	protein LSM14 homolog B-B	2682.75	2445.97	2521.7	2418.82	2416.44	2513.48	2455.64	2427.16	2936.01	2785.21	2916.21	2842.07	2740.6	2998.36	2816.35	2564.36	247.263	2464.96	2441.43	286.611	2879.14	2869.48	2816.35	-0.0539327	(1)	-0.0570317	(1)	-0.0708872	(1)	-0.00309898	(1)	-0.0169545	(1)	-0.0138555	(1)	0.00931677	(1)	0.00446592	(1)	-0.0224972	(1)	-0.00485085	(1)	-0.031814	(1)	-0.0269631	(1)
LOC100577149	15-hydroxyprostaglandin dehydrogenase	6350.37	5517.14	5280.27	5513.29	4985.97	5642.55	5028.13	4973.12	3902.24	4350.96	5641.83	4427.16	4061.08	4721.87	4308.53	5933.75	5396.78	5314.26	5.62576	4126.6	534.492	4391.47	438.529	-0.136846	(1)	-0.159075	(1)	-0.246837	(1)	-0.0222289	(1)	-0.10999	(1)	-0.0877614	(1)	0.286893	(1)	0.089751	(1)	0.062242	(1)	-0.197142	(1)	-0.224651	(1)	-0.027509	(1)
LOC724838	15-hydroxyprostaglandin dehydrogenase	538.764	425.684	617.671	556.26	461.02	626.2	449.844	412.142	286.44	298.699	190.602	242.412	304.907	379.419	258.86	482.224	586.966	543.699	43.9932	292.569	216.572	342.163	258.862	0.283572	(1)	0.172868	(1)	-0.162039	(1)	-0.110704	(1)	-0.445611	(1)	-0.334907	(1)	-0.434364	(1)	0.225904	(1)	-0.176606	(1)	0.660268	(0.493)	0.257758	(1)	-0.40251	(1)
LOC551423	15-hydroxyprostaglandin dehydrogenase	17947.4	15405.3	16447.5	15903.2	11716	20590.3	10273.4	12679.5	3291.04	3381.73	2984.51	3562	2658.74	4848.02	3790.81	16676.4	16175.4	16153.1	11476.5	3336.38	3273.26	3753.38	379.885	-0.0440084	(1)	-0.0459899	(1)	-0.539127	(1)	-0.00198152	(1)	-0.495119	(1)	-0.493137	(1)	-0.0275581	(1)	0.169907	(1)	0.184221	(1)	0.197465	(1)	0.211779	(1)	0.0143144	(1)
LOC409071	15-hydroxyprostaglandin dehydrogenase	5.03518	15.2302	11.8433	21.6275	13.9176	21.2271	13.6316	9.13841	7.06015	14.0979	9.53011	8.35904	13.0505	6.63983	16.1788	1.13269	16.7354	17.5724	11.3852	1.57976	8.94458	9.84516	16.1788	0.723885	(1)	0.79429	(1)	0.168121	(1)	0.0704049	(1)	-0.555765	(1)	-0.62617	(1)	-0.242119	(1)	-0.103718	(1)	0.612897	(1)	0.138401	(1)	0.855016	(1)	0.716615	(1)
LOC100576781	hypothetical protein LOC100576781	58.4081	56.3517	64.6824	50.1759	66.9784	81.049	48.6844	41.1229	79.6788	72.2516	96.8895	89.8597	104.404	118.568	105.784	57.3799	57.4291	74.1368	44.9363	75.9652	93.3746	111.486	15.7842	0.00123694	(1)	0.367246	(1)	-0.353714	(1)	0.366009	(1)	-0.35495	(1)	-0.72096	(1)	0.297692	(1)	0.553454	(1)	0.477714	(1)	0.255763	(1)	0.180022	(1)	-0.0757401	(1)
LOC409847	15-hydroxyprostaglandin dehydrogenase	2389.7	2471.86	2343.14	2180.05	2593.89	2366.82	2456.62	2275.46	2938.03	3133.25	3883.52	3514.98	3256.69	3695.54	3210.86	243.779	2261.6	248.356	2366.48	335.643	3699.25	3476.11	321.863	-0.104076	(1)	0.0291289	(1)	-0.0389441	(1)	0.133205	(1)	0.0651316	(1)	-0.068073	(1)	0.285232	(1)	0.195475	(1)	0.0809598	(1)	-0.0897567	(1)	-0.204272	(1)	-0.114515	(1)
LOC100576665		3.02111	5.33057	6.37714	10.3812	3.4794	4.82435	2.92107	11.8799	13.1117	26.4335	19.0602	24.0322	33.2194	22.7651	17.4233	4.17584	8.37918	4.15187	7.44998	19.7726	21.5462	27.9923	17.4233	1.00474	(1)	-0.00830446	(1)	0.825557	(1)	-1.01305	(1)	-0.179186	(1)	0.833861	(1)	0.123933	(1)	0.501526	(1)	-0.182486	(1)	0.377593	(1)	-0.306419	(1)	-0.684013	(1)
LOC413270	kelch-like protein 10-like	43.3026	88.3351	87.4579	96.8913	42.6226	60.7867	122.685	58.4858	307.621	385.929	347.849	380.336	501.851	442.971	265.083	65.8188	92.1746	51.7467	9.58528	346.775	364.928	472.412	265.828	0.485869	(1)	-0.348206	(1)	0.460776	(1)	-0.834075	(1)	-0.0250926	(1)	0.808982	(1)	0.0703066	(1)	0.446043	(1)	-0.387556	(1)	0.375737	(1)	-0.457863	(1)	-0.8336	(1)
LOC409848	hypothetical protein LOC409848	85.5981	91.3812	64.6824	115.924	153.963	98.4166	84.7109	119.713	183.564	190.321	122.303	211.066	243.214	160.304	207.835	88.4896	9.32969	126.19	12.2124	186.943	166.684	21.7597	27.8349	0.0292651	(1)	0.512017	(1)	0.207985	(1)	0.482752	(1)	0.17872	(1)	-0.304032	(1)	-0.165475	(1)	0.110039	(1)	0.152843	(1)	0.275514	(1)	0.318318	(1)	0.0428042	(1)
LOC725046	protein FAM135A-like	72.5066	92.1427	78.3477	109.868	135.696	84.9085	85.6846	88.6426	179.529	156.839	87.3594	199.572	173.216	127.105	161.788	82.3246	94.1776	11.3245	87.1636	168.184	143.466	15.1645	161.788	0.192989	(1)	0.422069	(1)	0.0824012	(1)	0.229079	(1)	-0.110588	(1)	-0.339667	(1)	-0.229335	(1)	-0.163536	(1)	-0.0559401	(1)	0.0657985	(1)	0.173395	(1)	0.107596	(1)
GlcAT-I (LOC413271)	galactosylgalactosylxylosylprotein	999.987	948.841	791.676	837.418	1253.45	1212.84	851.004	922.98	1059.02	1028.26	1062.61	1387.6	1488.94	1611.58	1458.58	974.415	814.547	1233.15	886.992	143.643	1225.14	155.262	1458.58	-0.258537	(1)	0.339737	(1)	-0.135615	(1)	0.598274	(0.862)	0.122923	(1)	-0.475352	(1)	0.231277	(1)	0.570884	(0.515)	0.482934	(1)	0.339607	(1)	0.251658	(1)	-0.0879497	(1)
IGFn3-12 (LOC409849)	fasciclin-2 isoform 1	1888.19	1777.36	1708.16	1738.85	1700.55	1939.39	1675.72	1727.16	1417.07	1343.7	1369.16	1255.95	1276.58	1333.66	1372.71	1832.78	1723.58	1819.98	171.439	138.388	1312.55	135.116	1372.76	-0.0886847	(1)	-0.0101172	(1)	-0.107277	(1)	0.0785676	(1)	-0.0185924	(1)	-0.09716	(1)	-0.072698	(1)	-0.0808952	(1)	-0.00805103	(1)	-0.00819726	(1)	0.0646469	(1)	0.0728442	(1)
LOC100576417		102.718	75.3895	104.767	74.3987	66.9784	80.0841	93.4741	64.8827	106.911	72.2516	268.431	134.79	182.707	93.9061	120.718	89.5358	89.583	73.5312	79.1784	89.5812	21.6153	138.365	12.7185	0.00855095	(1)	-0.276316	(1)	-0.169567	(1)	-0.284867	(1)	-0.178118	(1)	0.10675	(1)	1.1703	(1)	0.626602	(1)	0.430379	(1)	-0.543702	(1)	-0.739925	(1)	-0.196223	(1)
LOC725107	uncharacterized protein C20orf72-like	82.577	81.4815	58.3053	87.3752	70.4578	67.5408	80.8161	107.833	136.16	136.573	190.602	127.475	123.386	143.231	109.518	82.2926	72.8423	68.9993	94.3247	136.367	159.388	133.385	19.5178	-0.171403	(1)	-0.249557	(1)	0.201497	(1)	-0.0781539	(1)	0.3729	(1)	0.451054	(1)	0.221889	(1)	-0.0327206	(1)	-0.316325	(1)	-0.25461	(1)	-0.538214	(1)	-0.283604	(1)
mRpS12 (LOC409723)	40S ribosomal protein S12, mitochondrial isoform	662.63	586.362	537.502	583.078	551.484	638.743	568.634	558.357	756.444	716.348	905.361	679.172	724.895	737.969	693.198	624.496	56.2899	595.114	563.495	736.397	792.266	731.432	693.198	-0.156519	(1)	-0.0695273	(1)	-0.148289	(1)	0.086992	(1)	0.00823063	(1)	-0.0787614	(1)	0.105504	(1)	-0.00975723	(1)	-0.087215	(1)	-0.115261	(1)	-0.192719	(1)	-0.0774578	(1)
gt (LOC725191)	hypothetical protein LOC725191 (>1 isoforms)	1.00704	2.28453	3.64408	6.05571	0	7.71895	4.86844	1.82768	3.02578	5.2867	6.35341	2.08976	7.11845	9.48547	2.48904	1.64578	4.84989	3.85948	3.34863	4.15624	4.22158	8.3196	2.48944	1.55918	(1)	1.22963	(1)	1.02455	(1)	-0.329548	(1)	-0.534627	(1)	-0.205079	(1)	0.0225059	(1)	0.998173	(1)	-0.739689	(1)	0.975667	(1)	-0.762195	(1)	-1.73786	(1)
LOC100576565	zinc finger protein 511-like	32.2252	41.1215	52.8391	44.1202	40.013	40.5245	39.9212	50.2613	49.421	56.3915	34.9437	44.9299	43.8971	51.2215	67.2041	36.6733	48.4796	4.26877	45.9124	52.9625	39.9368	47.5593	67.2496	0.402647	(1)	0.13493	(1)	0.298116	(1)	-0.267718	(1)	-0.104532	(1)	0.163186	(1)	-0.405719	(1)	-0.15371	(1)	0.345111	(1)	0.252009	(1)	0.75083	(1)	0.498821	(1)
LOC550906	hypothetical protein LOC550906	5.03518	2.28453	5.46612	2.5953	2.60955	1.92974	3.89475	1.82768	4.03437	5.2867	4.76506	2.08976	7.11845	2.84564	3.73356	3.65986	4.37165	2.26964	2.86122	4.66535	3.42748	4.98245	3.73357	0.139248	(1)	-0.689322	(1)	-0.355157	(1)	-0.828569	(1)	-0.494405	(1)	0.334164	(1)	-0.443377	(1)	0.0962426	(1)	-0.319943	(1)	0.53962	(1)	0.123434	(1)	-0.416186	(1)
LOC100578792	hypothetical protein LOC100578792	86.6051	78.4355	116.611	72.6685	93.9437	68.5057	88.6056	74.0211	98.842	84.5872	130.245	48.0645	72.3709	67.3468	54.7589	82.5232	94.6395	81.2247	81.3134	91.7146	89.1547	69.8589	54.7589	0.197693	(1)	-0.022831	(1)	-0.0212564	(1)	-0.220524	(1)	-0.21895	(1)	0.00157458	(1)	-0.0408413	(1)	-0.392709	(1)	-0.744059	(1)	-0.351867	(1)	-0.703217	(1)	-0.35135	(1)
Tip60 (LOC413101)	histone acetyltransferase Tip60	287.005	260.436	280.594	241.363	220.072	258.585	280.422	238.513	287.449	284.601	285.903	198.527	317.957	261.799	214.057	273.728	26.9786	239.328	259.467	286.248	242.215	289.878	214.575	-0.0687736	(1)	-0.193714	(1)	-0.077152	(1)	-0.12494	(1)	-0.00837842	(1)	0.116562	(1)	-0.23985	(1)	0.0193067	(1)	-0.418142	(1)	0.259157	(1)	-0.178292	(1)	-0.437449	(1)
LOC100578841	hypothetical protein LOC100578841 (>1 isoforms)	1.00704	0	0.91102	0.865101	0	0	0.973688	0.913841	1.00859	0.881117	4.76506	1.04488	0	0.948547	0	0.535182	0.888637		0.943765	0.944855	2.94968	0.474273		0.818614	(1)			0.906383	(1)			0.0877695	(1)			1.62036	(1)	-0.994373	(1)			-2.61473	(1)
LOC100578896		6.04222	12.1842	7.28816	4.32551	7.82864	1.92974	7.78951	11.8799	3.02578	6.16782	15.8835	8.35904	9.49127	13.2797	14.9342	9.11319	5.86831	4.87919	9.83473	4.5968	12.1213	11.3855	14.9342	-0.650204	(1)	-0.901314	(1)	0.109929	(1)	-0.25111	(1)	0.760133	(1)	1.01124	(1)	1.39884	(1)	1.30849	(1)	1.69992	(1)	-0.0903494	(1)	0.301082	(1)	0.391431	(1)
LOC100578922		0	0.76151	5.46612	2.5953	0	0	5.84213	0	6.05155	2.64335	1.58835	1.04488	4.74563	0.948547	2.48904	0.387548	4.37165		2.92165	4.34745	1.31662	2.84791	2.48944	3.4041	(1)			2.93956	(1)			-0.46454	(1)			-1.72334	(1)	-0.610682	(1)	-0.80458	(1)	1.11265	(1)	0.918755	(1)	-0.193899	(1)
LOC100578981	hypothetical protein LOC100578981	4.02815	3.04604	1.82204	2.5953	2.60955	2.89461	1.94738	1.82768	6.05155	2.64335	4.76506	3.13464	9.49127	5.69128	3.73356	3.53793	2.28671	2.75277	1.88753	4.34745	3.94985	7.59127	3.73357	-0.679385	(1)	-0.362043	(1)	-0.906065	(1)	0.317342	(1)	-0.22668	(1)	-0.544022	(1)	-0.138373	(1)	0.804172	(1)	-0.219618	(1)	0.942545	(1)	-0.0812452	(1)	-1.02379	(1)
LOC100578945	hypothetical protein LOC100578945	4.02815	3.04604	2.73306	1.7302	1.7397	0.964869	0.973688	1.82768	4.03437	4.40558	1.58835	2.08976	1.18641	3.79419	8.71164	3.53793	2.23164	1.35228	1.46854	4.21998	1.83956	2.49298	8.71164	-0.664466	(1)	-1.38717	(1)	-1.33643	(1)	-0.722701	(1)	-0.671965	(1)	0.0507354	(1)	-1.19827	(1)	-0.760917	(1)	1.04571	(1)	0.437353	(1)	2.24398	(1)	1.80663	(1)
LOC100579016		3.02111	3.04604	4.5551	3.4604	4.34924	1.92974	4.86844	0.913841	4.03437	4.40558	1.58835	5.2244	5.93204	11.3826	12.4452	3.33574	4.77513	3.13949	2.89114	4.21998	3.46377	8.65732	12.4452	0.401775	(1)	0.0495123	(1)	-0.0693792	(1)	-0.352262	(1)	-0.471154	(1)	-0.118892	(1)	-0.308997	(1)	1.03668	(1)	1.56028	(1)	1.34568	(1)	1.86928	(1)	0.5236	(1)
LOC724150	hypothetical protein LOC724150	444.103	617.584	494.684	487.917	635.86	462.172	610.503	424.936	798.805	633.523	309.729	553.787	516.088	521.701	525.188	53.8437	491.334	549.159	517.719	716.164	431.758	518.894	525.188	-0.111682	(1)	0.0485608	(1)	-0.0361168	(1)	0.160243	(1)	0.0755651	(1)	-0.0846776	(1)	-0.730068	(1)	-0.46485	(1)	-0.447457	(1)	0.265219	(1)	0.282611	(1)	0.0173922	(1)
rad (LOC410006)	hypothetical protein LOC410006	108.76	109.657	116.611	103.812	107.861	79.1193	142.159	95.9533	205.753	230.853	181.072	161.956	253.891	226.703	220.28	19.2866	11.2113	93.4926	119.559	218.327	171.514	24.2975	22.2873	0.0131852	(1)	-0.224199	(1)	0.124552	(1)	-0.237384	(1)	0.111367	(1)	0.348751	(1)	-0.348001	(1)	0.138489	(1)	0.0130089	(1)	0.48649	(1)	0.36101	(1)	-0.12548	(1)
LOC100577328	o-glucosyltransferase rumi homolog	32.2252	31.9834	42.8179	36.3342	34.794	36.665	52.5792	36.5536	57.4898	41.4125	42.8855	40.7503	56.9476	61.6555	38.5801	32.1428	39.5768	35.7295	44.5665	49.4511	41.8179	59.3157	38.5813	0.301863	(1)	0.154349	(1)	0.473191	(1)	-0.147514	(1)	0.171328	(1)	0.318841	(1)	-0.241882	(1)	0.262067	(1)	-0.358145	(1)	0.503949	(1)	-0.116263	(1)	-0.620213	(1)
LOC409868	matrix metalloproteinase-14-like	2905.3	2783.32	2527.17	3015.74	2755.68	2102.45	2391.38	2842.05	2190.66	2490.04	1553.41	1779.43	1458.1	1596.4	1620.37	2844.39	2771.46	2429.65	2616.71	234.349	1666.42	1527.25	162.365	-0.0374343	(1)	-0.227677	(1)	-0.120323	(1)	-0.190242	(1)	-0.0828885	(1)	0.107354	(1)	-0.489972	(0.647)	-0.615787	(0.284)	-0.530405	(1)	-0.125815	(1)	-0.0404328	(1)	0.0853827	(1)
kinesin-3A (LOC409869)	kinesin 3A	3489.38	4114.44	3391.73	4068.57	4304.01	3235.21	3600.7	3885.65	2980.39	2770.23	2234.81	2506.67	2180.62	2107.67	2089.55	381.988	373.148	3769.69	3743.18	2875.32	237.74	2144.14	289.549	-0.027491	(1)	-0.012309	(1)	-0.022461	(1)	0.0151819	(1)	0.00502992	(1)	-0.010152	(1)	-0.278381	(1)	-0.423315	(1)	-0.460526	(1)	-0.144935	(1)	-0.182145	(1)	-0.0372105	(1)
LOC100577265		15.1055	17.5147	12.7543	18.1671	17.397	14.473	16.5527	18.2768	23.1976	22.909	31.767	20.8976	49.8292	22.7651	41.0692	16.3113	15.467	15.9356	17.4148	23.5333	26.3323	36.2971	41.6917	-0.0771631	(1)	-0.033569	(1)	0.0945422	(1)	0.0435941	(1)	0.171705	(1)	0.128111	(1)	0.19186	(1)	0.654881	(1)	0.833081	(1)	0.463021	(1)	0.641221	(1)	0.1782	(1)
LOC100577027	hypothetical protein LOC100577027	163.14	169.055	202.246	158.313	164.401	176.571	183.053	172.716	182.555	183.272	187.426	182.854	186.266	179.275	154.321	166.975	18.2799	17.4862	177.885	182.914	185.14	182.777	154.325	0.118208	(1)	0.0376247	(1)	0.0989119	(1)	-0.0805836	(1)	-0.0192964	(1)	0.0612871	(1)	0.0174516	(1)	-0.00112842	(1)	-0.245234	(1)	-0.01858	(1)	-0.262685	(1)	-0.244105	(1)
LOC409668	proteasome inhibitor PI31 subunit-like	606.236	498.789	650.468	527.712	560.183	530.678	586.16	622.326	636.422	577.132	794.176	573.639	607.441	626.989	609.815	552.512	589.898	545.433	64.2431	66.7766	683.977	617.215	69.8149	0.092481	(1)	-0.0186119	(1)	0.129122	(1)	-0.111093	(1)	0.0366414	(1)	0.147734	(1)	0.172636	(1)	0.0246083	(1)	0.0072059	(1)	-0.148028	(1)	-0.16543	(1)	-0.0174024	(1)
Prl-1 (LOC409669)	protein tyrosine phosphatase type IVA 1	4135.9	3685.71	3363.48	3708.69	3930.85	3393.44	3365.07	3917.64	4414.61	4149.18	6129.45	5247.39	4062.26	4148.94	4520.1	391.825	3536.86	3662.15	3641.35	4281.89	5688.42	415.632	452.973	-0.145311	(1)	-0.0947755	(1)	-0.102991	(1)	0.0505356	(1)	0.0423207	(1)	-0.00821499	(1)	0.409779	(0.980)	-0.0606548	(1)	0.0781049	(1)	-0.470434	(0.726)	-0.331674	(1)	0.13876	(1)
LOC409670	solute carrier organic anion transporter family	140.985	217.792	136.653	269.046	320.974	145.695	163.58	241.254	259.208	171.818	239.841	217.335	230.163	182.121	165.521	179.388	22.8497	233.335	22.4169	215.513	228.588	26.1421	165.521	0.177324	(1)	0.379314	(1)	0.174243	(1)	0.20199	(1)	-0.00308169	(1)	-0.205072	(1)	0.0849757	(1)	-0.0641356	(1)	-0.380759	(1)	-0.149111	(1)	-0.465735	(1)	-0.316623	(1)
LOC100576955		10.0704	7.6151	3.64408	6.05571	6.08894	3.85948	6.81582	8.22457	14.1203	14.979	4.76506	15.6732	22.5418	26.5593	17.4233	8.84273	4.84989	4.97429	7.52194	14.5496	1.21913	24.5554	17.4233	-0.866539	(1)	-0.830025	(1)	-0.233722	(1)	0.0365142	(1)	0.632817	(1)	0.596303	(1)	-0.509711	(1)	0.754771	(1)	0.260033	(1)	1.26448	(1)	0.769744	(1)	-0.494738	(1)
LOC552333	solute carrier organic anion transporter family	18.1267	25.1298	35.5298	37.1993	21.7462	11.5784	64.2634	25.5876	108.928	60.7971	163.6	29.2567	49.8292	55.0157	23.6459	21.6282	36.3646	16.6623	44.9255	84.8625	96.4285	52.4224	23.6459	0.749617	(1)	-0.376326	(1)	1.05462	(1)	-1.12594	(1)	0.305001	(1)	1.43094	(1)	0.184332	(1)	-0.694943	(1)	-1.84354	(1)	-0.879274	(1)	-2.02787	(1)	-1.1486	(1)
LOC100577407	hypothetical protein LOC100577407	31.2181	11.4226	52.8391	39.7946	21.7462	20.2622	63.2897	31.9844	45.3866	38.7691	101.655	32.3913	37.9651	32.2506	21.1568	21.3239	46.3169	21.4235	47.6379	42.779	67.2299	35.1784	21.1568	1.1193	(1)	-0.0215533	(1)	1.15985	(1)	-1.14086	(1)	0.0405468	(1)	1.18141	(1)	0.671592	(1)	-0.26127	(1)	-0.991938	(1)	-0.932861	(1)	-1.66353	(1)	-0.730668	(1)
LOC100577357		201.407	273.382	250.53	200.703	216.592	144.73	262.896	264.1	638.439	393.859	357.379	482.735	440.157	349.065	289.973	237.395	225.617	18.6614	263.498	516.15	42.5697	394.611	289.973	-0.0734119	(1)	-0.393999	(1)	0.150505	(1)	-0.320587	(1)	0.223917	(1)	0.544504	(1)	-0.297203	(1)	-0.387355	(1)	-0.831868	(1)	-0.0901525	(1)	-0.534665	(1)	-0.444513	(1)
LOC411414	WD repeat-containing protein 69-like	75.5277	74.6279	91.102	83.0497	80.8959	96.4869	92.5004	76.7627	109.937	108.377	81.0059	90.9046	107.963	124.26	124.452	75.7784	87.7583	88.6914	84.6315	19.157	85.9553	116.111	124.452	0.213885	(1)	0.240408	(1)	0.172808	(1)	0.0265222	(1)	-0.0410772	(1)	-0.0675994	(1)	-0.344746	(1)	0.0891055	(1)	0.189185	(1)	0.433852	(1)	0.533932	(1)	0.10008	(1)
nmdyn-D7 (LOC412782)	nucleoside diphosphate kinase 7	74.5207	71.5819	102.034	93.4309	90.4643	87.8031	84.7109	88.6426	78.6702	85.4683	87.3594	68.9621	84.235	100.546	74.6712	73.513	97.7326	89.1337	86.6767	82.6926	78.1673	92.3948	74.6712	0.419929	(1)	0.287061	(1)	0.246735	(1)	-0.132869	(1)	-0.173194	(1)	-0.0403258	(1)	-0.070398	(1)	0.170902	(1)	-0.13629	(1)	0.2413	(1)	-0.0658919	(1)	-0.307192	(1)
LOC725192	major facilitator superfamily domain-containing	77.5418	69.2974	138.475	85.645	128.738	92.6274	76.9214	100.523	110.945	123.356	47.6506	192.258	103.218	109.083	180.455	73.4196	112.6	11.6825	88.722	117.158	119.954	16.153	18.4554	0.610034	(1)	0.592191	(1)	0.273126	(1)	-0.0178439	(1)	-0.336908	(1)	-0.319064	(1)	0.0341184	(1)	-0.142259	(1)	0.623276	(1)	-0.176377	(1)	0.589158	(1)	0.765535	(1)
LOC725108	hypothetical protein LOC725108	13.0915	12.9457	23.6865	8.65101	13.9176	14.473	12.6579	18.2768	18.1547	14.979	9.53011	15.6732	28.4738	25.6108	31.113	13.1857	16.1688	14.1954	15.4674	16.5668	12.6166	27.4228	31.1135	0.312638	(1)	0.124843	(1)	0.248659	(1)	-0.187795	(1)	-0.0639798	(1)	0.123815	(1)	-0.394683	(1)	0.70692	(1)	0.909221	(1)	1.1016	(1)	1.3039	(1)	0.202301	(1)
LOC100577441	hypothetical protein LOC100577441	0	0	1.82204	0	0	0.964869	0.973688	0	1.00859	0	0	1.04488	14.2369	0.948547	0		0.911197	0.482435	0.486844	0.542961	0.522443	7.59272								-0.917149	(1)	-0.904022	(1)	0.013127	(1)	0.0509949	(1)	3.91227	(1)			3.86128	(1)
SP45 (LOC412101)	hypothetical protein LOC412101	205.435	175.147	244.153	270.777	226.161	146.66	252.185	145.301	161.375	159.482	127.068	121.206	148.301	201.092	164.277	19.2913	257.465	186.414	198.743	16.4285	124.137	174.696	164.277	0.436166	(1)	-0.0297274	(1)	0.0626944	(1)	-0.465894	(1)	-0.373472	(1)	0.0924218	(1)	-0.369995	(1)	0.122921	(1)	0.0341975	(1)	0.492916	(1)	0.404193	(1)	-0.0887231	(1)
LOC724995	1-acyl-sn-glycerol-3-phosphate acyltransferase	32.2252	6.09208	65.5934	29.4134	10.4382	21.2271	41.8686	22.846	10.0859	3.52447	7.94176	2.08976	11.8641	7.58838	7.46712	19.1586	47.5343	15.8327	32.3573	6.85195	5.15763	9.72623	7.46712	1.31004	(1)	-0.275091	(1)	0.756098	(1)	-1.58513	(1)	-0.55394	(1)	1.03119	(1)	-0.440168	(1)	0.515244	(1)	0.133916	(1)	0.955412	(1)	0.574084	(1)	-0.381328	(1)
LOC724951	1-acyl-sn-glycerol-3-phosphate acyltransferase	547.828	512.496	398.116	359.882	446.232	863.558	287.238	376.503	57.4898	66.9649	52.4156	39.7055	78.303	144.179	103.295	53.1619	378.999	654.895	331.874	62.2273	46.6535	111.241	13.2952	-0.48424	(1)	0.304831	(1)	-0.675813	(1)	0.789071	(1)	-0.191574	(1)	-0.980644	(1)	-0.434017	(1)	0.838069	(1)	0.731153	(1)	1.27209	(0.912)	1.16517	(1)	-0.106916	(1)
LOC724907	1-acyl-sn-glycerol-3-phosphate acyltransferase	2698.86	2381.24	2534.46	1981.08	2399.04	3901.93	1579.32	1915.41	144.229	121.594	135.01	87.77	142.369	327.249	207.835	254.498	2257.77	315.487	1747.37	132.911	111.39	234.888	27.8349	-0.169958	(1)	0.310718	(1)	-0.539674	(1)	0.480677	(1)	-0.369715	(1)	-0.850392	(1)	-0.254846	(1)	0.821022	(1)	0.644973	(1)	1.07587	(0.736)	0.899819	(1)	-0.176049	(1)
LOC412863	lysine-specific demethylase 6A-like	32.2252	56.3517	52.8391	48.4457	66.1085	32.8055	37.9738	38.3813	38.3265	37.0069	30.1787	47.0196	45.0835	29.405	41.0692	44.2884	5.64242	49.4573	38.1776	37.6668	38.5992	37.2442	41.6917	0.193416	(1)	0.159245	(1)	-0.214204	(1)	-0.0341702	(1)	-0.40762	(1)	-0.37345	(1)	0.0352793	(1)	-0.0162727	(1)	0.124766	(1)	-0.051552	(1)	0.0894865	(1)	0.141039	(1)
LOC100577812		11.0774	7.6151	10.9322	9.51611	8.69849	3.85948	7.78951	9.13841	17.1461	14.0979	19.0602	11.4937	16.6097	14.2282	14.9342	9.34625	1.22417	6.27898	8.46396	15.622	15.277	15.419	14.9342	0.129525	(1)	-0.573857	(1)	-0.143055	(1)	-0.703382	(1)	-0.27258	(1)	0.430802	(1)	-0.0322194	(1)	-0.0188708	(1)	-0.0649522	(1)	0.0133486	(1)	-0.0327329	(1)	-0.0460814	(1)
LOC100577774	hypothetical protein LOC100577774	4.02815	3.80755	2.73306	7.78591	6.95879	2.89461	4.86844	1.82768	6.05155	6.16782	1.58835	2.08976	1.18641	2.84564	1.24452	3.91785	5.25948	4.9267	3.34863	6.19686	1.83956	2.16245	1.24452	0.42486	(1)	0.33056	(1)	-0.226735	(1)	-0.0943	(1)	-0.651595	(1)	-0.557295	(1)	-1.73213	(1)	-1.59958	(1)	-2.29551	(1)	0.132547	(1)	-0.563376	(1)	-0.695924	(1)
LOC412864	FUN14 domain-containing protein 1-like isoform	744.2	795.778	790.765	788.972	767.207	764.176	821.793	806.922	659.619	717.229	546.393	641.557	631.169	682.954	573.724	769.989	789.869	765.691	814.357	688.424	593.975	657.615	573.724	0.0367754	(1)	-0.00807412	(1)	0.0808247	(1)	-0.0448495	(1)	0.0440493	(1)	0.0888988	(1)	-0.212896	(1)	-0.0672694	(1)	-0.262941	(1)	0.145627	(1)	-0.0500454	(1)	-0.195672	(1)
LOC551270		334.336	338.11	345.276	318.357	324.454	314.547	328.133	310.706	336.87	383.286	384.381	350.035	373.719	374.676	397.002	336.223	331.817	319.546	319.419	36.7782	367.285	374.197	397.194	-0.0190322	(1)	-0.0736012	(1)	-0.0739669	(1)	-0.054569	(1)	-0.0549347	(1)	-0.000365711	(1)	0.028289	(1)	0.0554905	(1)	0.140837	(1)	0.0272015	(1)	0.112548	(1)	0.0853468	(1)
LOC726427	metallo-beta-lactamase domain-containing protein	176.231	175.909	192.225	176.481	213.113	138.941	192.79	178.199	174.486	208.825	149.305	173.45	154.233	184.967	161.788	176.747	184.353	176.275	185.495	191.656	161.378	169.6	161.788	0.0663205	(1)	-0.000352318	(1)	0.0752281	(1)	-0.0666728	(1)	0.00890766	(1)	0.0755805	(1)	-0.248075	(1)	-0.176381	(1)	-0.244415	(1)	0.0716945	(1)	0.00366077	(1)	-0.0680338	(1)
Nhe3 (LOC552330)	sodium/hydrogen exchanger 7	542.793	549.81	542.057	514.735	593.237	504.627	527.739	552.874	594.061	585.062	525.744	661.409	554.053	547.312	517.72	546.313	528.396	548.932	54.3649	589.561	593.577	55.6821	517.724	-0.0480775	(1)	0.00692987	(1)	-0.0159188	(1)	0.0550074	(1)	0.0321587	(1)	-0.0228487	(1)	0.00979335	(1)	-0.0984218	(1)	-0.187468	(1)	-0.108215	(1)	-0.197262	(1)	-0.0890466	(1)
LOC727505	protein Mpv17-like	2.01407	4.56906	2.73306	5.19061	5.21909	3.85948	4.86844	5.48305	2.01718	2.64335	9.53011	4.17952	4.74563	2.84564	11.2007	3.29157	3.96183	4.53928	5.17574	2.33268	6.85482	3.79564	11.2682	0.267394	(1)	0.463691	(1)	0.652993	(1)	0.196297	(1)	0.385598	(1)	0.189301	(1)	1.55662	(1)	0.703846	(1)	2.26502	(1)	-0.852776	(1)	0.708397	(1)	1.56117	(1)
LOC100578132	glutamate--cysteine ligase-like	4193.3	3979.65	4105.97	4370.49	3729.04	3876.84	3670.81	3945.97	1443.3	1313.75	1742.42	1557.92	1182.85	1441.79	1451.11	486.474	4238.23	382.943	388.386	1378.52	165.169	1312.32	1451.12	0.0526045	(1)	-0.10374	(1)	-0.101677	(1)	-0.156345	(1)	-0.154282	(1)	0.00206327	(1)	0.259494	(1)	-0.0710008	(1)	0.0740369	(1)	-0.330494	(1)	-0.185457	(1)	0.145038	(1)
RpLP0 (LOC550711)	60S acidic ribosomal protein P0 isoform 1	17370.4	15764.8	16264.4	16109.9	15055.3	17172.7	14856.5	14273.3	7331.46	8060.46	8735.94	8196.04	7961.99	9345.08	8770.13	16567.6	16187.2	16114.4	14564.9	7695.96	8465.99	8653.54	877.134	-0.0335111	(1)	-0.0400438	(1)	-0.185865	(1)	-0.00653268	(1)	-0.152354	(1)	-0.145822	(1)	0.137578	(1)	0.169189	(1)	0.188498	(1)	0.031611	(1)	0.0509203	(1)	0.0193092	(1)
Spt-I (LOC552392)	serine palmitoyltransferase 1	1087.6	1072.21	1118.73	1087.43	1192.56	1237.93	1111.95	1205.36	1222.41	1272.33	1064.2	1203.7	1186.41	1253.98	1243.28	179.924	113.83	1215.24	1158.65	1247.37	1133.95	122.194	1243.28	0.0306392	(1)	0.170346	(1)	0.101549	(1)	0.139707	(1)	0.07091	(1)	-0.0687969	(1)	-0.137537	(1)	-0.0317831	(1)	-0.00474701	(1)	0.105754	(1)	0.13279	(1)	0.0270361	(1)
LOC410158	adenylyl cyclase-associated protein 1-like	5408.79	4920.88	5535.36	5293.55	5208.65	5389.76	5198.52	5038.01	3233.55	3515.66	3318.07	3615.29	2955.34	3074.24	3390.07	5164.83	5414.45	5299.27	5118.26	3374.61	3466.68	314.792	339.73	0.068094	(1)	0.0370545	(1)	-0.0130673	(1)	-0.0310396	(1)	-0.0811614	(1)	-0.0501218	(1)	0.0388362	(1)	-0.162659	(1)	0.00659921	(1)	-0.201495	(1)	-0.032237	(1)	0.169258	(1)
LOC100578754	histone demethylase UTY-like	85.5981	189.616	71.9706	256.07	233.989	82.0139	96.3952	152.611	119.014	74.0138	69.8875	176.585	97.2855	61.6555	51.0253	137.67	164.223	158.164	124.534	96.5138	123.236	79.4752	51.2533	0.25332	(1)	0.199385	(1)	-0.14437	(1)	-0.0539346	(1)	-0.39769	(1)	-0.343755	(1)	0.352618	(1)	-0.280316	(1)	-0.919522	(1)	-0.632934	(1)	-1.27214	(1)	-0.639206	(1)
LOC726262	adenylate cyclase type 8-like	17.1196	16.7532	21.8645	32.0087	32.1844	14.473	16.5527	9.13841	20.1718	15.8601	31.767	19.8527	15.4233	17.0738	7.46712	16.9364	26.9367	23.3287	12.8456	18.1597	25.8988	16.2486	7.46712	0.66944	(1)	0.461979	(1)	-0.398859	(1)	-0.207461	(1)	-1.0683	(1)	-0.860838	(1)	0.518647	(1)	-0.148963	(1)	-1.27065	(1)	-0.66761	(1)	-1.7893	(1)	-1.12169	(1)
LOC726241	tudor domain-containing protein 7-like	1140.97	1309.8	1068.63	1287.27	1199.52	1085.48	1104.16	1151.44	891.596	1045	857.71	925.764	845.909	824.287	817.65	1225.38	1177.95	1142.5	1127.81	968.355	891.737	835.982	817.65	-0.0569583	(1)	-0.101041	(1)	-0.119722	(1)	-0.0440825	(1)	-0.0627633	(1)	-0.0186809	(1)	-0.118836	(1)	-0.213508	(1)	-0.243971	(1)	-0.0946725	(1)	-0.125135	(1)	-0.0304629	(1)
LOC412602	polyadenylate-binding protein 1-like isoform 1	35704.5	31395.5	29756.6	29053.6	31106.7	34536.5	26855.3	28433.3	15457.7	16217	23750.6	24472.1	13158.5	17577.5	21548.9	33550	2945.95	32821.6	27644.3	15837.3	24111.4	15368	21548.9	-0.190247	(1)	-0.0316674	(1)	-0.279332	(1)	0.158579	(1)	-0.0890854	(1)	-0.247664	(1)	0.606386	(0.169)	-0.0433999	(1)	0.444284	(1)	-0.649786	(0.094)	-0.162103	(1)	0.487684	(1)
LOC551757	cytochrome b-c1 complex subunit 7-like	1615.29	1733.2	1787.42	1667.91	1799.72	1707.82	1668.9	1753.66	2113	2260.06	2538.19	2017.66	2652.81	2304.97	2252.58	1674.24	1727.67	1753.77	1711.28	2186.53	2277.93	2478.89	2252.58	0.0453184	(1)	0.0669504	(1)	0.0315698	(1)	0.0216319	(1)	-0.0137487	(1)	-0.0353806	(1)	0.0590755	(1)	0.181049	(1)	0.0429344	(1)	0.121973	(1)	-0.0161411	(1)	-0.138114	(1)
LOC409056	sodium-dependent phosphate transporter 1-B-like	43.3026	55.5902	51.0171	55.3665	44.3623	69.4706	66.2108	50.2613	68.5843	69.6082	73.0642	64.7826	87.7942	89.1634	88.3609	49.4464	53.1918	56.9164	58.2364	69.9625	68.9234	88.4788	88.3693	0.105338	(1)	0.20298	(1)	0.236047	(1)	0.0976418	(1)	0.130709	(1)	0.033067	(1)	-0.00361383	(1)	0.356725	(1)	0.354801	(1)	0.360338	(1)	0.358415	(1)	-0.00192338	(1)
LOC551814	EF-hand domain-containing protein 1-like	40.2815	50.2596	43.7289	44.1202	41.7527	50.1732	41.8686	34.726	34.2921	31.7202	36.5321	47.0196	48.6427	30.3535	39.8246	45.2755	43.9245	45.963	38.2973	33.6172	41.7759	39.4981	39.8246	-0.0435452	(1)	0.0218992	(1)	-0.241331	(1)	0.0654445	(1)	-0.197785	(1)	-0.26323	(1)	0.339934	(1)	0.259048	(1)	0.270926	(1)	-0.0808854	(1)	-0.0690079	(1)	0.0118775	(1)
LOC551840	YTH domain family protein 1-like	2599.16	2343.17	2272.08	2406.71	2217.24	2264.55	2324.19	2259.93	1912.29	1931.41	1758.31	1700.02	1590.97	1880.02	1807.04	2471.16	2339.4	224.896	2292.62	1921.85	1729.16	1735.5	187.433	-0.0790534	(1)	-0.141114	(1)	-0.108544	(1)	-0.062061	(1)	-0.0294909	(1)	0.03257	(1)	-0.152421	(1)	-0.147147	(1)	-0.0888643	(1)	0.00527479	(1)	0.0635572	(1)	0.0582824	(1)
Tango11 (LOC551864)	transport and Golgi organization protein 11	674.714	669.367	649.557	657.477	654.996	657.076	725.398	647	577.923	623.831	584.514	595.582	512.528	615.607	568.746	672.467	653.517	656.36	686.199	6.87737	59.4768	564.677	568.746	-0.040324	(1)	-0.0347736	(1)	0.0300778	(1)	0.0055504	(1)	0.0704018	(1)	0.0648514	(1)	-0.0262383	(1)	-0.0912015	(1)	-0.079286	(1)	-0.0649633	(1)	-0.0530477	(1)	0.0119155	(1)
LOC725611	DNA polymerase alpha catalytic subunit-like	180.26	157.632	195.869	196.378	207.894	227.709	200.58	173.63	168.435	140.979	128.657	171.36	174.402	165.047	165.521	168.946	196.124	217.815	187.149	154.768	15.8448	169.725	165.521	0.215201	(1)	0.366452	(1)	0.147284	(1)	0.151251	(1)	-0.0679164	(1)	-0.219167	(1)	-0.0444928	(1)	0.133659	(1)	0.0974793	(1)	0.178152	(1)	0.141972	(1)	-0.0361798	(1)
LOC725653	pseudouridine-5'-monophosphatase-like (>1 isoforms)	971.79	999.101	1100.51	1083.11	1007.28	1020.83	1007.77	1119.46	1002.54	986.851	1240.5	1155.64	1130.65	1105.06	1123.8	985.445	191.891	114.583	163.611	994.696	1198.73	1117.85	1123.82	0.147873	(1)	0.0412926	(1)	0.110123	(1)	-0.10658	(1)	-0.0377495	(1)	0.0688307	(1)	0.268385	(1)	0.168402	(1)	0.17606	(1)	-0.0999832	(1)	-0.092325	(1)	0.00765814	(1)
LOC412526	protein disulfide-isomerase A6-like isoform 1	2054.35	1602.22	1789.24	1775.19	1668.37	1849.65	2017.48	1679.64	1740.83	1835.37	2168.1	1990.5	1758.26	1581.23	2028.57	1828.29	1782.22	1759.12	1848.56	1788.98	279.299	1669.74	228.568	-0.0368198	(1)	-0.0557258	(1)	0.0159116	(1)	-0.0189061	(1)	0.0527314	(1)	0.0716374	(1)	0.217671	(1)	-0.0988005	(1)	0.182036	(1)	-0.316472	(1)	-0.0356355	(1)	0.280836	(1)
LOC725685	gamma-tubulin complex component 5-like	171.196	180.478	248.708	220.601	258.345	207.447	222.001	238.513	237.019	252.881	189.014	271.669	295.416	233.343	256.371	175.837	234.655	232.896	23.2567	244.95	23.3414	264.379	256.371	0.4163	(1)	0.405447	(1)	0.389005	(1)	-0.0108529	(1)	-0.0272952	(1)	-0.0164423	(1)	-0.0887127	(1)	0.110122	(1)	0.0657475	(1)	0.198834	(1)	0.15446	(1)	-0.0443742	(1)
LOC551980	ras-related GTP-binding protein D-like	611.271	644.237	654.112	679.969	694.139	689.881	639.713	774.023	664.662	759.523	654.401	780.526	660.829	719.947	772.847	627.754	667.478	692.137	76.8683	712.925	717.463	69.3883	772.847	0.0875754	(1)	0.140594	(1)	0.171242	(1)	0.0530187	(1)	0.0836666	(1)	0.0306479	(1)	0.0108405	(1)	-0.0446567	(1)	0.118118	(1)	-0.0554972	(1)	0.107278	(1)	0.162775	(1)
LOC100578849	hypothetical protein LOC100578849	153.07	188.093	147.585	192.052	214.853	202.622	161.632	190.993	194.658	185.916	127.068	235.098	194.571	177.378	177.966	17.5812	169.819	28.7376	176.313	19.287	181.831	185.975	177.966	-0.00646242	(1)	0.291232	(1)	0.0476763	(1)	0.297694	(1)	0.0541388	(1)	-0.243555	(1)	-0.0715247	(1)	-0.0330711	(1)	-0.0965721	(1)	0.0384536	(1)	-0.0250473	(1)	-0.063501	(1)
LOC100578432	cyclin-dependent kinase 2-interacting	87.6122	74.6279	87.4579	80.4544	85.2452	65.6111	77.8951	75.8488	73.6272	71.3705	90.5361	74.1865	94.9127	74.9352	73.4267	81.1255	83.9561	75.4281	76.8719	72.4988	82.3613	84.9239	73.4267	0.0495773	(1)	-0.104956	(1)	-0.0776015	(1)	-0.154533	(1)	-0.127179	(1)	0.0273542	(1)	0.184008	(1)	0.228213	(1)	0.0183465	(1)	0.0442049	(1)	-0.165662	(1)	-0.209867	(1)
LOC409057	hypothetical protein LOC409057	4298.03	3393.29	3486.47	3555.57	3095.79	3590.28	3226.8	3077.82	2294.55	2727.06	2974.98	2872.38	2166.38	2530.72	2582.38	3845.66	3521.19	3343.35	3152.32	251.82	2923.68	2348.55	2582.38	-0.127238	(1)	-0.202072	(1)	-0.286821	(1)	-0.0748345	(1)	-0.159583	(1)	-0.0847489	(1)	0.219637	(1)	-0.0963765	(1)	0.0405527	(1)	-0.316014	(1)	-0.179084	(1)	0.136929	(1)
LOC411417	tetratricopeptide repeat protein 27-like	1543.79	1489.51	1208.92	1496.62	1510.06	1578.53	1180.11	1314.1	1013.64	1357.8	1272.27	1516.12	1242.17	1324.17	1458.58	1516.65	1352.77	1544.29	1247.17	1185.72	1394.2	1283.18	1458.58	-0.164967	(1)	0.0260572	(1)	-0.282303	(1)	0.191024	(1)	-0.117336	(1)	-0.30836	(1)	0.233672	(1)	0.113952	(1)	0.298801	(1)	-0.11972	(1)	0.0651291	(1)	0.184849	(1)
LOC552134	riboflavin kinase-like	1046.31	1047.84	1018.52	1003.52	1149.94	1199.33	1045.74	1178.86	914.793	1000.95	1248.44	1109.66	1014.38	1117.39	1011.79	147.744	111.186	1174.64	1112.3	957.879	1179.54	165.884	111.795	-0.0505539	(1)	0.165851	(1)	0.0871801	(1)	0.216404	(1)	0.137734	(1)	-0.0786704	(1)	0.299726	(1)	0.154147	(1)	0.0790137	(1)	-0.14558	(1)	-0.220713	(1)	-0.0751331	(1)
LOC725948	hypothetical protein LOC725948	317.216	335.826	357.12	347.771	345.33	393.667	353.449	410.315	323.758	353.328	368.498	367.798	363.041	368.036	387.046	326.521	352.445	369.498	381.882	338.543	368.148	365.539	387.458	0.110223	(1)	0.178391	(1)	0.22595	(1)	0.0681688	(1)	0.115727	(1)	0.0475584	(1)	0.120946	(1)	0.110685	(1)	0.193165	(1)	-0.0102613	(1)	0.0722192	(1)	0.0824806	(1)
LOC725983	putative ATP-dependent RNA helicase DHX57-like	326.28	353.34	322.501	363.342	396.651	370.51	353.449	361.881	370.153	367.426	481.271	437.805	514.901	453.405	509.009	339.811	342.922	383.584	357.665	368.79	459.538	484.153	59.8756	0.0131504	(1)	0.1748	(1)	0.07388	(1)	0.16165	(1)	0.0607297	(1)	-0.10092	(1)	0.317386	(1)	0.392666	(1)	0.464893	(1)	0.0752806	(1)	0.147507	(1)	0.0722265	(1)
LOC412937	probable elongator complex protein 2-like	445.11	436.345	438.2	402.272	467.979	492.083	447.897	467.887	472.021	476.684	497.154	464.972	431.853	498.936	489.096	44.7276	42.2362	48.3943	457.892	474.353	481.63	465.394	489.964	-0.0686865	(1)	0.12324	(1)	0.0551192	(1)	0.191927	(1)	0.123806	(1)	-0.0681211	(1)	0.0202656	(1)	-0.027507	(1)	0.0441588	(1)	-0.0477727	(1)	0.0238932	(1)	0.0716659	(1)
CAP-D2 (LOC412035)	condensin complex subunit 1	268.879	290.135	338.899	304.516	289.66	269.198	289.185	286.032	309.638	297.818	327.201	329.137	355.923	300.689	312.375	279.569	321.774	279.43	287.689	33.7277	328.169	328.359	312.375	0.202865	(1)	-0.000402036	(1)	0.041224	(1)	-0.203267	(1)	-0.161641	(1)	0.041626	(1)	0.11166	(1)	0.112263	(1)	0.0404987	(1)	0.000602239	(1)	-0.0711616	(1)	-0.0717638	(1)
Upf3 (LOC552225)	hypothetical protein LOC552225 (>1 isoforms)	897.269	925.996	823.562	872.887	835.055	918.555	859.767	847.131	747.367	735.733	713.17	737.686	768.793	804.368	750.446	911.633	848.224	876.852	853.449	741.55	725.428	786.582	75.4457	-0.104007	(1)	-0.0561963	(1)	-0.0951479	(1)	0.0478103	(1)	0.00885862	(1)	-0.0389516	(1)	-0.0317114	(1)	0.0850505	(1)	0.0172042	(1)	0.116762	(1)	0.0489156	(1)	-0.0678462	(1)
LOC552246	transmembrane protein 43 homolog	645.51	568.086	612.205	618.547	570.621	610.762	547.213	625.981	567.837	681.103	641.694	643.646	535.07	503.678	562.523	66.7983	615.376	59.6915	586.597	624.474	642.673	519.374	562.523	0.0202518	(1)	-0.0388122	(1)	-0.0488472	(1)	-0.059064	(1)	-0.069099	(1)	-0.010035	(1)	0.0414456	(1)	-0.265859	(1)	-0.150721	(1)	-0.307304	(1)	-0.192166	(1)	0.115138	(1)
LOC412431	thiamine transporter 2-like	388.716	468.328	580.32	554.53	565.402	559.624	511.186	583.944	325.775	288.125	179.484	280.028	204.062	254.211	240.192	428.522	567.425	562.513	547.565	36.9525	229.756	229.136	24.1924	0.405059	(1)	0.392516	(1)	0.353661	(1)	-0.0125427	(1)	-0.0513975	(1)	-0.0388548	(1)	-0.417903	(1)	-0.421798	(1)	-0.353814	(1)	-0.00389499	(1)	0.0640888	(1)	0.0679838	(1)
LOC100579028	hypothetical protein LOC100579028	5.03518	6.09208	8.19918	2.5953	6.95879	4.82435	3.89475	7.31073	3.02578	3.52447	1.58835	3.13464	1.18641	1.89709	2.48904	5.56363	5.39724	5.89157	5.62741	3.27512	2.3615	1.54175	2.48944	-0.0438045	(1)	0.0826253	(1)	0.0101065	(1)	0.12643	(1)	0.053911	(1)	-0.0725188	(1)	-0.471847	(1)	-1.08698	(1)	-0.395959	(1)	-0.615132	(1)	0.0758882	(1)	0.69102	(1)
serpin-5 (LOC413749)	antithrombin-III	8394.66	7966.91	7387.46	7214.94	6890.07	7981.4	6804.13	7074.96	7770.19	7404.03	8561.22	7744.65	6951.17	7060.03	7134.83	818.785	731.268	7435.73	6939.55	7587.2	8152.94	75.6529	7134.83	-0.164105	(1)	-0.137764	(1)	-0.237398	(1)	0.0263416	(1)	-0.0732924	(1)	-0.099634	(1)	0.103769	(1)	-0.115042	(1)	-0.0886705	(1)	-0.218811	(1)	-0.19244	(1)	0.0263712	(1)
LOC100578688	hypothetical protein LOC100578688	206.442	151.54	155.784	132.36	140.046	167.887	113.922	145.301	190.624	207.062	249.371	188.078	201.689	221.96	207.835	178.991	144.724	153.966	129.611	198.843	218.725	211.825	27.8349	-0.313096	(1)	-0.217275	(1)	-0.465701	(1)	0.0958218	(1)	-0.152604	(1)	-0.248426	(1)	0.137486	(1)	0.0912396	(1)	0.0638065	(1)	-0.0462464	(1)	-0.0736795	(1)	-0.0274331	(1)
LOC727029	26S proteasome non-ATPase regulatory subunit	1612.27	1609.83	1475.85	1441.26	1509.19	1499.41	1406.98	1596.48	1345.46	1338.42	1203.97	1338.49	944.381	1165.76	1222.12	1611.48	1458.56	154.297	151.737	1341.94	1271.23	155.726	1222.12	-0.14346	(1)	-0.0989102	(1)	-0.101374	(1)	0.0445496	(1)	0.0420856	(1)	-0.00246402	(1)	-0.0780928	(1)	-0.346977	(1)	-0.134935	(1)	-0.268884	(1)	-0.056842	(1)	0.212042	(1)
LOC727023	transcription initiation factor TFIID subunit	341.385	328.211	383.539	318.357	318.365	392.702	362.212	357.312	324.767	348.041	401.853	301.97	353.55	319.66	357.177	334.798	35.9482	355.533	359.762	336.439	351.912	336.65	357.177	0.0679674	(1)	0.0866934	(1)	0.103752	(1)	0.018726	(1)	0.0357845	(1)	0.0170585	(1)	0.0650191	(1)	0.000862047	(1)	0.0864458	(1)	-0.0641571	(1)	0.0214267	(1)	0.0855838	(1)
LOC412310	UPF0468 protein CG5343-like	1.00704	0.76151	4.5551	1.7302	1.7397	0	1.94738	2.74152	3.02578	2.64335	3.1767	1.04488	4.74563	2.84564	1.24452	0.884273	3.14265	0.869849	2.34446	2.83456	2.11792	3.79564	1.24452	1.82942	(1)	-0.0237271	(1)	1.40669	(1)	-1.85315	(1)	-0.422732	(1)	1.43041	(1)	-0.425342	(1)	0.421215	(1)	-1.18754	(1)	0.846558	(1)	-0.762195	(1)	-1.60875	(1)
LOC724872	hypothetical protein LOC724872	0	1.52302	2.73306	0	1.7397	2.89461	0	0.913841	2.01718	2.64335	1.58835	1.04488	3.55923	0	2.48904	0.761596	1.36653	2.31715	0.456926	2.33268	1.31662	1.77961	2.48944	0.843583	(1)	1.60542	(1)	-0.736919	(1)	0.761836	(1)	-1.5805	(1)	-2.34234	(1)	-0.823661	(1)	-0.388932	(1)	0.0950941	(1)	0.434728	(1)	0.918755	(1)	0.484026	(1)
LOC409525	oxysterol-binding protein-related protein 1-like	327.287	347.248	297.903	297.595	347.07	390.772	331.054	286.032	304.595	340.111	324.024	376.157	380.837	370.882	393.268	337.268	297.75	368.928	38.5432	322.353	35.9373	375.859	393.268	-0.179797	(1)	0.129417	(1)	-0.128421	(1)	0.309214	(1)	0.0513752	(1)	-0.257839	(1)	0.119086	(1)	0.221552	(1)	0.286873	(1)	0.102466	(1)	0.167787	(1)	0.0653209	(1)
LOC726199	hypothetical protein LOC726199	3897.23	3529.6	2793.19	2925.77	3580.3	3378.97	2917.17	3090.61	2534.59	2653.92	3434.02	2906.86	2455.87	2483.3	2744.17	3713.41	2859.48	3479.63	33.8952	2594.26	317.437	2469.59	2744.17	-0.376994	(1)	-0.0938103	(1)	-0.305914	(1)	0.283183	(1)	0.0710799	(1)	-0.212104	(1)	0.28936	(1)	-0.071056	(1)	0.0810463	(1)	-0.360416	(1)	-0.208313	(1)	0.152102	(1)
LOC726179	hypothetical protein LOC726179	0	1.52302	1.82204	1.7302	1.7397	0	0.973688	2.74152	2.01718	1.76223	4.76506	1.04488	3.55923	4.74273	4.97808	0.761596	1.77613	0.869849	1.85766	1.8898	2.94968	4.1598	4.97887	1.2218	(1)	0.191902	(1)	1.28651	(1)	-1.02989	(1)	0.0647148	(1)	1.09461	(1)	0.620358	(1)	1.13529	(1)	1.39743	(1)	0.51493	(1)	0.777067	(1)	0.262138	(1)
5-HT2beta (LOC552518)	serotonin receptor	133.936	86.8121	113.877	179.941	92.204	156.309	79.8424	60.3135	65.5585	27.3146	79.4176	37.6157	23.7282	35.0962	23.6459	11.374	146.992	124.256	7.77985	46.4366	58.5166	29.4122	23.6459	0.412525	(1)	0.17092	(1)	-0.655367	(1)	-0.241605	(1)	-1.06789	(1)	-0.826287	(1)	0.333586	(1)	-0.658846	(1)	-0.973672	(1)	-0.992432	(1)	-1.30726	(1)	-0.314826	(1)
LOC100577331	hypothetical protein LOC100577331	0	3.04604	0.91102	1.7302	3.4794	5.78921	2.92107	3.65536	0	1.76223	0	1.04488	2.37282	0.948547	0	1.52319	1.32619	4.63435	3.28821	0.881117	0.522443	1.66682		-0.205729	(1)	1.60542	(1)	1.11037	(1)	1.81115	(1)	1.3161	(1)	-0.495048	(1)	-0.754067	(1)	0.91437	(1)			1.66844	(1)
LOC409699		1874.09	1538.25	1582.44	1449.04	1487.44	1613.26	1556.93	1558.1	1678.3	1489.09	2017.21	1625.83	1532.84	1603.04	1709.97	176.173	1515.74	155.351	1557.51	1583.69	1821.52	1567.94	179.977	-0.170738	(1)	-0.138168	(1)	-0.131519	(1)	0.0325702	(1)	0.0392197	(1)	0.00664945	(1)	0.201851	(1)	-0.0144201	(1)	0.110679	(1)	-0.216271	(1)	-0.0911716	(1)	0.1251	(1)
LOC726592	hypothetical protein LOC726592	109449	77889.5	97347.9	76599.5	91021	82259.9	86437.2	68339.8	25414.5	51872.2	61759.9	25738.5	50383.2	36537.1	28385	93669.1	86973.7	8664.45	77388.6	38643.4	43749.2	4346.15	28385.2	-0.106994	(1)	-0.112533	(1)	-0.275454	(1)	-0.00553876	(1)	-0.16846	(1)	-0.162921	(1)	0.179036	(1)	0.169472	(1)	-0.445091	(1)	-0.00956425	(1)	-0.624128	(1)	-0.614563	(1)
Toll-6 (LOC410229)	slit homolog 2 protein	47.3307	48.7366	43.7289	60.5571	59.1497	45.3488	58.4213	50.2613	64.5499	66.9649	54.004	41.7952	43.8971	46.4788	54.7589	48.3366	52.1439	52.2493	54.3413	65.7574	47.8996	45.188	54.7589	0.118428	(1)	0.121365	(1)	0.178003	(1)	0.0029374	(1)	0.0595748	(1)	0.0566374	(1)	-0.45714	(1)	-0.541215	(1)	-0.26406	(1)	-0.0840751	(1)	0.19308	(1)	0.277155	(1)
Su(var)3-3 (LOC726469)	lysine-specific histone demethylase 1A	328.294	293.943	270.573	278.563	296.618	250.866	305.738	257.703	333.844	265.216	206.486	205.841	215.926	247.571	207.835	311.118	274.568	273.742	281.727	299.54	26.1636	231.749	27.8349	-0.180301	(1)	-0.184645	(1)	-0.143198	(1)	-0.004344	(1)	0.0371036	(1)	0.0414476	(1)	-0.538911	(0.926)	-0.370141	(1)	-0.527263	(1)	0.168771	(1)	0.0116481	(1)	-0.157122	(1)
Toll-8 (LOC410231)	slit homolog 2 protein	28.197	18.2762	24.5975	16.4369	39.1432	25.0866	16.5527	17.363	61.5241	59.9159	55.5923	54.3338	52.202	45.5303	56.0034	23.2366	2.51723	32.1149	16.9578	6.72357	54.9635	48.8662	56.3484	-0.179565	(1)	0.466842	(1)	-0.454448	(1)	0.646407	(1)	-0.274883	(1)	-0.92129	(1)	-0.143711	(1)	-0.313338	(1)	-0.116658	(1)	-0.169628	(1)	0.0270526	(1)	0.19668	(1)
LOC726453	ATP synthase subunit s, mitochondrial-like	33.2322	33.5064	43.7289	32.0087	36.5337	45.3488	36.0265	39.2952	25.2148	30.8391	28.5903	29.2567	30.8466	34.1477	37.3356	33.3693	37.8688	4.94125	37.6682	28.2695	28.9235	32.4972	37.3357	0.182489	(1)	0.295033	(1)	0.174542	(1)	0.112544	(1)	-0.00794693	(1)	-0.120491	(1)	0.0454272	(1)	0.213499	(1)	0.413737	(1)	0.168072	(1)	0.36831	(1)	0.200239	(1)
LOC100576957	UPF0544 protein C5orf45 homolog	12.0844	15.9917	14.5763	19.0322	10.4382	16.4028	18.5001	10.0523	21.1804	19.3846	31.767	20.8976	23.7282	36.0448	18.6678	14.3869	16.8427	13.4248	14.2762	2.28254	26.3323	29.8865	18.6678	0.259483	(1)	-0.0649083	(1)	0.024264	(1)	-0.324392	(1)	-0.235219	(1)	0.0891723	(1)	0.376599	(1)	0.559257	(1)	-0.119684	(1)	0.182658	(1)	-0.496283	(1)	-0.678941	(1)
Sulf1 (LOC410233)	extracellular sulfatase SULF-1 homolog	1733.11	1401.94	1163.37	1464.62	1327.39	1509.06	983.425	1171.54	851.252	844.11	776.704	778.436	605.068	939.061	924.678	1567.52	1313.99	1418.22	177.485	847.689	777.575	772.648	924.678	-0.254529	(1)	-0.144404	(1)	-0.54082	(1)	0.110125	(1)	-0.286291	(1)	-0.396416	(1)	-0.124549	(1)	-0.134799	(1)	0.125431	(1)	-0.0102505	(1)	0.249979	(1)	0.26023	(1)
LOC410234	UDP-glucuronic acid decarboxylase 1-like	322.252	278.713	267.84	301.92	298.358	297.18	319.37	253.134	277.363	303.985	225.546	299.881	243.214	286.461	266.327	3.48286	284.883	297.769	286.252	29.6749	262.713	264.837	266.327	-0.0769245	(1)	-0.0130859	(1)	-0.0699938	(1)	0.0638386	(1)	0.00693074	(1)	-0.0569079	(1)	-0.145913	(1)	-0.134295	(1)	-0.126202	(1)	0.0116177	(1)	0.019711	(1)	0.00809335	(1)
LOC408302	solute carrier family 22 member 21-like	1461.21	1117.9	1084.11	1331.39	1372.62	1292.92	1051.58	891.909	722.152	630.88	444.739	673.948	612.187	495.141	548.833	1289.55	127.752	1332.77	971.746	676.516	559.343	553.665	548.833	-0.0945468	(1)	0.04756	(1)	-0.40822	(1)	0.142107	(1)	-0.313673	(1)	-0.45578	(1)	-0.27439	(1)	-0.289113	(1)	-0.301755	(1)	-0.0147228	(1)	-0.0273655	(1)	-0.0126427	(1)
LOC412302	zinc finger C4H2 domain-containing protein-like	365.554	339.633	337.077	310.571	297.488	362.791	393.37	342.69	356.033	308.391	320.847	315.554	308.466	305.432	326.064	352.594	323.824	33.1395	368.326	332.212	318.249	36.9491	326.643	-0.122796	(1)	-0.094931	(1)	0.0618175	(1)	0.0278647	(1)	0.184613	(1)	0.156749	(1)	-0.062168	(1)	-0.114104	(1)	-0.0269476	(1)	-0.0519364	(1)	0.0352204	(1)	0.0871568	(1)
LOC552144	major facilitator superfamily domain-containing	318.224	317.55	307.014	288.079	360.117	306.828	320.343	282.377	246.096	265.216	200.132	248.682	287.111	251.365	255.127	317.887	297.546	333.473	31.3619	255.656	224.469	269.238	255.127	-0.0953984	(1)	0.0690577	(1)	-0.0770229	(1)	0.164456	(1)	0.0183754	(1)	-0.146081	(1)	-0.188088	(1)	0.0746756	(1)	-0.00299225	(1)	0.262764	(1)	0.185096	(1)	-0.0776678	(1)
LOC100578152		43.3026	54.0672	60.1273	65.7477	75.6768	59.8219	66.2108	75.8488	70.6015	57.2726	88.9477	76.2763	85.4214	82.5236	85.8719	48.6849	62.9375	67.7494	71.2981	63.9373	82.612	83.9725	85.8719	0.370446	(1)	0.476734	(1)	0.544951	(1)	0.106288	(1)	0.174505	(1)	0.0682172	(1)	0.3697	(1)	0.393265	(1)	0.425534	(1)	0.0235656	(1)	0.0558348	(1)	0.0322692	(1)
Dnmt1-1 (LOC726540)	DNA (cytosine-5)-methyltransferase PliMCI	1481.35	1500.17	1478.58	1545.07	1420.46	1440.55	1510.19	1569.07	999.515	1109.33	1176.97	1315.5	882.688	936.216	942.102	149.762	1511.83	143.563	1539.63	154.425	1246.24	99.4518	942.118	0.0202435	(1)	-0.0595243	(1)	0.0465316	(1)	-0.0797679	(1)	0.026288	(1)	0.106056	(1)	0.241128	(1)	-0.213381	(1)	-0.162495	(1)	-0.454509	(0.730)	-0.403623	(1)	0.0508858	(1)
LOC552501	transmembrane and coiled-coil domain-containing	422.955	466.044	436.378	408.328	470.588	468.926	401.16	511.751	448.824	450.251	522.568	591.402	360.668	430.64	434.338	444.5	422.354	469.757	456.455	449.537	556.986	395.654	434.338	-0.0737326	(1)	0.0797335	(1)	0.0382916	(1)	0.153466	(1)	0.112024	(1)	-0.0414419	(1)	0.309198	(1)	-0.1842	(1)	-0.0496236	(1)	-0.493398	(0.816)	-0.358822	(1)	0.134577	(1)
PNUTS (LOC412093)	hypothetical protein LOC412093	3681.73	3809.07	3145.75	3609.2	3789.93	3566.16	3193.7	3456.15	3445.35	3495.39	2876.51	3358.25	3803.63	3762.89	3866.72	3745.4	3377.48	3678.44	3324.92	347.378	3117.38	3783.26	3866.72	-0.149173	(1)	-0.0261805	(1)	-0.171798	(1)	0.122993	(1)	-0.0226249	(1)	-0.145618	(1)	-0.154758	(1)	0.124538	(1)	0.156022	(1)	0.279296	(1)	0.31078	(1)	0.0314837	(1)
mRpS18B (LOC552526)	28S ribosomal protein S18b, mitochondrial	178.245	194.185	208.624	206.759	240.948	241.217	211.29	222.063	185.581	175.342	131.833	167.181	157.792	178.327	124.452	186.215	27.6913	241.827	216.677	18.4616	149.574	168.596	124.452	0.15747	(1)	0.372557	(1)	0.218574	(1)	0.215087	(1)	0.0611043	(1)	-0.153983	(1)	-0.271479	(1)	-0.102719	(1)	-0.536102	(1)	0.168759	(1)	-0.264624	(1)	-0.433383	(1)
kinesin-3C (LOC412638)	kinesin 3C	1422.94	1431.64	1505	1462.02	1503.97	1499.41	1406.98	1481.34	1141.73	1163.96	1041.96	1304.01	1152	1069.96	1110.11	1427.29	1483.51	151.688	1444.16	1152.85	1172.98	111.982	111.113	0.0557385	(1)	0.0733059	(1)	0.0169499	(1)	0.0175675	(1)	-0.0387886	(1)	-0.056356	(1)	0.0249909	(1)	-0.0533583	(1)	-0.0544881	(1)	-0.0783493	(1)	-0.0794791	(1)	-0.00112981	(1)
LOC100578341	hypothetical protein LOC100578341	14027	15893.5	13766.4	12765.4	13742.7	15100.2	13175	14780.5	5083.3	5722.85	4788.88	5040.5	4742.07	5549.95	5239.43	1496.24	13265.9	14421.5	13977.7	543.794	4914.69	5146.11	5239.43	-0.173408	(1)	-0.0529148	(1)	-0.0980039	(1)	0.120493	(1)	0.075404	(1)	-0.0450891	(1)	-0.136681	(1)	-0.0703273	(1)	-0.044372	(1)	0.0663535	(1)	0.0923088	(1)	0.0259553	(1)
Catsup (LOC412094)	protein catecholamines up	1028.18	982.347	1234.43	1129.82	1178.65	1184.86	1065.22	1278.46	618.267	675.817	800.529	853.667	626.424	663.034	711.866	15.2658	1182.13	1181.75	1171.84	647.418	827.983	644.729	711.866	0.233808	(1)	0.233351	(1)	0.221198	(1)	-0.000457293	(1)	-0.01261	(1)	-0.0121527	(1)	0.3542	(1)	-0.00516623	(1)	0.137746	(1)	-0.359366	(1)	-0.216454	(1)	0.142912	(1)
LOC726627	tetratricopeptide repeat protein 19-like	4.02815	4.56906	3.64408	1.7302	6.08894	5.78921	5.84213	5.48305	4.03437	6.16782	4.76506	7.31416	5.93204	8.53692	7.46712	4.29862	2.68714	5.93979	5.66259	5.11934	6.39694	7.23448	7.46712	-0.677796	(1)	0.466372	(1)	0.397594	(1)	1.14417	(1)	1.07539	(1)	-0.0687773	(1)	0.243649	(1)	0.504083	(1)	0.549746	(1)	0.260434	(1)	0.306097	(1)	0.0456624	(1)
LOC725675	tetratricopeptide repeat protein 19-like	3.02111	2.28453	2.73306	2.5953	2.60955	3.85948	4.86844	1.82768	2.01718	1.76223	0	2.08976	1.18641	2.84564	3.73356	2.65282	2.66418	3.23451	3.34863	1.8898	1.44884	2.16245	3.73357	0.00616588	(1)	0.286021	(1)	0.3358	(1)	0.279856	(1)	0.329634	(1)	0.0497785	(1)	-0.854826	(1)	0.093349	(1)	0.982388	(1)	0.948175	(1)	1.83721	(1)	0.889039	(1)
LOC412598	transmembrane protein C9orf91 homolog	1170.18	1302.94	1262.67	1227.58	1316.95	1174.25	1369.01	1107.58	1024.73	971.872	700.463	844.263	831.672	976.055	888.587	1236.56	1245.13	1245.6	1238.3	998.379	772.363	93.8635	888.587	0.00995974	(1)	0.0105072	(1)	0.00201817	(1)	0.000547426	(1)	-0.00794157	(1)	-0.008489	(1)	-0.370195	(1)	-0.14337	(1)	-0.167961	(1)	0.226825	(1)	0.202234	(1)	-0.0245912	(1)
Rrp1 (LOC551153)	recombination repair protein 1	80.5629	65.4898	83.8138	84.7799	86.9849	78.1544	76.9214	86.8149	75.6444	85.4683	115.95	117.027	92.5399	93.9061	112.007	73.2637	84.2969	82.5696	81.8681	8.55638	116.488	93.223	112.682	0.207061	(1)	0.177194	(1)	0.164885	(1)	-0.0298675	(1)	-0.0421766	(1)	-0.0123092	(1)	0.532113	(1)	0.210687	(1)	0.475516	(1)	-0.321425	(1)	-0.0565967	(1)	0.264829	(1)
rasp (LOC725603)	protein-cysteine N-palmitoyltransferase Rasp	13.0915	6.09208	7.28816	9.51611	6.95879	15.4379	10.7106	5.48305	8.06874	7.04893	14.2952	6.26928	8.30486	11.3826	7.46712	9.59178	8.42134	11.1983	8.96895	7.55884	1.28222	9.84372	7.46712	-0.191042	(1)	0.223416	(1)	-0.244444	(1)	0.414458	(1)	-0.0534024	(1)	-0.46786	(1)	0.443916	(1)	0.381038	(1)	-0.017612	(1)	-0.0628783	(1)	-0.461528	(1)	-0.39865	(1)
LOC725562	hypothetical protein LOC725562	73.5137	110.419	100.212	99.4866	126.128	83.9436	83.7372	80.418	76.653	88.9928	71.4758	106.578	77.1165	60.707	62.226	91.9663	99.8494	15.3584	82.7769	82.823	89.2682	68.9118	62.2269	0.118649	(1)	0.191705	(1)	-0.164116	(1)	0.0730562	(1)	-0.282765	(1)	-0.355821	(1)	0.10421	(1)	-0.265279	(1)	-0.412512	(1)	-0.36949	(1)	-0.516722	(1)	-0.147233	(1)
LOC726219	hypothetical protein LOC726219	18.1267	27.4143	29.1526	25.953	36.5337	31.8407	29.2107	33.8121	28.2406	22.0279	22.2369	29.2567	41.5243	30.3535	36.0911	22.7757	27.5528	34.1872	31.5114	25.1343	25.7468	35.9389	36.9185	0.275035	(1)	0.586289	(1)	0.468707	(1)	0.311254	(1)	0.193673	(1)	-0.117582	(1)	0.0347378	(1)	0.515891	(1)	0.521988	(1)	0.481154	(1)	0.48725	(1)	0.00609642	(1)
ABCB7 (LOC412749)	ATP-binding cassette sub-family B member 7,	268.879	328.211	286.06	320.952	343.59	314.547	285.291	325.327	347.964	373.594	257.313	369.888	354.736	368.985	349.71	298.545	33.5633	329.688	35.3966	36.7789	313.634	361.864	349.712	0.0237798	(1)	0.140442	(1)	0.0323236	(1)	0.116663	(1)	0.0085438	(1)	-0.108119	(1)	-0.202188	(1)	0.00431822	(1)	-0.0449553	(1)	0.206506	(1)	0.157233	(1)	-0.0492736	(1)
LOC551463	decaprenyl-diphosphate synthase subunit 2-like	442.089	466.044	474.641	457.638	477.547	463.137	518.002	493.474	455.884	532.195	595.632	547.517	535.07	539.723	497.808	454.664	466.14	47.3428	55.7382	494.391	571.575	537.397	497.887	0.0378595	(1)	0.050807	(1)	0.155487	(1)	0.0129475	(1)	0.117628	(1)	0.10468	(1)	0.210317	(1)	0.121362	(1)	0.0109643	(1)	-0.0889546	(1)	-0.199352	(1)	-0.110398	(1)
Bet3 (LOC412710)	trafficking protein particle complex subunit 3	383.681	357.91	358.942	397.946	389.692	408.14	353.449	383.813	428.652	415.006	522.568	432.58	430.666	400.287	446.783	37.7952	378.444	398.916	368.632	421.829	477.574	415.477	446.783	0.0294577	(1)	0.105462	(1)	-0.00844486	(1)	0.0760045	(1)	-0.0379026	(1)	-0.113907	(1)	0.179067	(1)	-0.0218909	(1)	0.0829157	(1)	-0.200958	(1)	-0.0961512	(1)	0.104807	(1)
LOC726265	lysM and putative peptidoglycan-binding	320.238	351.056	351.654	308.841	359.248	356.037	334.949	362.795	267.277	309.272	330.377	323.913	268.128	305.432	280.017	335.647	33.2473	357.642	348.872	288.274	327.146	286.782	28.1742	-0.0233968	(1)	0.091573	(1)	0.0557536	(1)	0.11497	(1)	0.0791503	(1)	-0.0358194	(1)	0.182487	(1)	-0.00749772	(1)	-0.0419285	(1)	-0.189985	(1)	-0.224416	(1)	-0.0344308	(1)
Cka (LOC550685)	striatin isoform 2	2173.18	2080.44	2055.26	2057.21	1986.73	1980.88	2009.69	2002.23	1917.33	2095.3	1825.02	1895.41	1676.39	1725.41	1777.17	2126.81	256.235	1983.85	25.9594	26.3148	186.215	17.99	1777.17	-0.0486888	(1)	-0.100424	(1)	-0.0844018	(1)	-0.0517349	(1)	-0.035713	(1)	0.0160218	(1)	-0.109079	(1)	-0.238249	(1)	-0.174962	(1)	-0.12917	(1)	-0.0658836	(1)	0.0632865	(1)
LOC100577401	hypothetical protein LOC100577401	880.15	926.757	766.168	891.919	792.432	810.49	813.03	805.094	713.075	768.334	838.65	762.763	779.47	751.249	759.157	93.4535	829.434	81.4611	89.6192	74.743	8.76265	765.36	759.157	-0.124003	(1)	-0.172818	(1)	-0.1592	(1)	-0.048815	(1)	-0.0351975	(1)	0.0136175	(1)	0.112375	(1)	0.0472403	(1)	0.0355012	(1)	-0.0651351	(1)	-0.0768742	(1)	-0.0117391	(1)
LOC410225	probable E3 ubiquitin-protein ligase	427.99	475.182	354.387	467.155	474.937	426.472	375.844	401.176	437.729	429.985	277.962	458.703	370.159	379.419	406.958	451.586	41.7762	45.7479	388.6	433.857	368.332	374.79	46.9582	-0.136669	(1)	-0.00281873	(1)	-0.21705	(1)	0.13385	(1)	-0.0803813	(1)	-0.214231	(1)	-0.236213	(1)	-0.211141	(1)	-0.0923394	(1)	0.025072	(1)	0.143873	(1)	0.118801	(1)
crc #2 (LOC410226)	activating transcription factor of chaperone	23955.4	22999.1	23782.2	20111	23075.4	23627.7	20484.5	22132.3	17006.9	18507.9	20318.2	18830.8	16137.5	17514.9	18253.4	23477.2	21946.6	23351.5	2138.39	17757.4	19574.5	16826.2	18253.4	-0.0972667	(1)	-0.00774612	(1)	-0.139842	(1)	0.0895206	(1)	-0.0425752	(1)	-0.132096	(1)	0.140559	(1)	-0.0777067	(1)	0.0397455	(1)	-0.218265	(1)	-0.100813	(1)	0.117452	(1)
LOC410227	inactive hydroxysteroid dehydrogenase-like	314.195	321.357	429.09	360.747	317.495	374.369	369.028	313.448	233.993	240.545	335.142	251.816	213.554	287.41	277.528	317.776	394.919	345.933	341.238	237.269	293.479	25.4817	277.528	0.313545	(1)	0.122477	(1)	0.102766	(1)	-0.191067	(1)	-0.210779	(1)	-0.0197115	(1)	0.306734	(1)	0.0781801	(1)	0.226109	(1)	-0.228554	(1)	-0.080625	(1)	0.147929	(1)
LOC550998	carbohydrate sulfotransferase 11-like	4996.91	3627.07	5551.75	5142.16	4023.92	5112.84	5012.55	3625.21	2367.17	2236.27	2973.39	2084.54	1793.85	2976.54	2123.15	4311.99	5346.96	4568.39	4318.88	231.723	2528.97	2385.19	2123.15	0.310363	(1)	0.0833283	(1)	0.00230181	(1)	-0.227035	(1)	-0.308062	(1)	-0.0810265	(1)	0.135835	(1)	0.0513946	(1)	-0.116505	(1)	-0.0844403	(1)	-0.25234	(1)	-0.1679	(1)
DEG6 (LOC726149)	sodium channel protein Nach	99.6966	72.3434	94.746	85.645	98.2929	121.573	74.974	85.9011	58.4983	43.1747	71.4758	52.244	79.4894	73.0381	93.339	86.2937	9.19553	19.9333	8.43754	5.83654	61.8599	76.2637	93.3391	0.0683836	(1)	0.353883	(1)	-0.0968034	(1)	0.285499	(1)	-0.165187	(1)	-0.450686	(1)	0.283139	(1)	0.585131	(1)	0.876614	(1)	0.301992	(1)	0.593475	(1)	0.291483	(1)
LOC100578876	hypothetical protein LOC100578876 (>1 isoforms)	14.0985	6.85359	7.28816	12.1114	15.6573	17.3676	5.84213	4.56921	4.03437	2.64335	3.1767	0	3.55923	6.63983	3.73356	1.47648	9.69979	16.5125	5.25668	3.33886	1.58835	5.99527	3.73357	-0.11107	(1)	0.656461	(1)	-1.00894	(1)	0.76753	(1)	-0.89787	(1)	-1.6654	(1)	-1.07182	(1)	0.611008	(1)	0.161197	(1)	1.68283	(1)	1.23302	(1)	-0.449811	(1)
Pka-C3 (LOC410228)	protein kinase DC2	2943.57	1715.68	1624.35	616.817	1843.21	2224.99	1044.77	936.687	400.411	412.363	222.369	151.508	436.598	509.37	398.246	2329.62	112.583	234.988	99.7274	46.3869	186.938	472.984	398.246	-1.05585	(1)	-0.195708	(1)	-1.23354	(1)	0.860141	(1)	-0.177689	(1)	-1.03783	(1)	-1.12029	(1)	0.218937	(1)	-0.0291924	(1)	1.33923	(0.877)	1.0911	(1)	-0.24813	(1)
LOC100578960		2.01407	2.28453	2.73306	0.865101	3.4794	2.89461	1.94738	4.56921	2.01718	2.64335	1.58835	4.17952	5.93204	3.79419	1.24452	2.14938	1.79986	3.18712	3.25829	2.33268	2.88394	4.86311	1.24452	-0.256608	(1)	0.568332	(1)	0.600248	(1)	0.82494	(1)	0.856856	(1)	0.0319159	(1)	0.307544	(1)	1.06139	(1)	-0.904906	(1)	0.753841	(1)	-1.21245	(1)	-1.96629	(1)
Mir263 (LOC732499)	ame-miR-263	0	0	0	0	0	0	0	0	0	0	0	0	0	0	0
LOC410239	hypothetical protein LOC410239	869.072	895.535	852.714	882.403	821.137	896.363	916.241	836.165	798.805	751.593	773.527	815.007	698.795	844.207	803.96	882.339	867.559	858.753	876.227	775.199	794.268	771.563	83.9643	-0.0243142	(1)	-0.0390369	(1)	-0.010011	(1)	-0.0147227	(1)	0.0143032	(1)	0.0290259	(1)	0.0350577	(1)	-0.00689911	(1)	0.0525574	(1)	-0.0419568	(1)	0.0174996	(1)	0.0594565	(1)
LOC726063	zinc finger protein 568-like	418.927	500.312	470.086	410.923	452.321	469.891	448.87	423.108	390.325	420.293	320.847	431.536	384.396	423.052	465.451	459.619	44.5458	461.164	435.989	45.3896	376.191	43.7241	465.455	-0.0612829	(1)	0.00465946	(1)	-0.0761469	(1)	0.0659424	(1)	-0.014864	(1)	-0.0808064	(1)	-0.107555	(1)	-0.00565234	(1)	0.199606	(1)	0.101903	(1)	0.307161	(1)	0.205258	(1)
LOC410238	leukocyte receptor cluster member 1-like	109.767	80.72	89.2799	79.5893	77.4165	89.7328	95.4215	76.7627	88.7561	88.1117	106.42	91.9495	92.5399	73.0381	77.1603	95.2435	84.4346	83.5747	86.9258	88.4339	99.1845	82.789	77.1625	-0.173786	(1)	-0.188555	(1)	-0.14574	(1)	-0.0147685	(1)	0.0280456	(1)	0.0428142	(1)	0.165516	(1)	-0.0951608	(1)	-0.196742	(1)	-0.260676	(1)	-0.362257	(1)	-0.101581	(1)
DebB (LOC725880)	small nuclear ribonucleoprotein F (>1 isoforms)	439.068	417.307	470.997	406.597	414.048	485.329	429.397	466.973	454.875	458.181	771.939	579.909	568.29	551.106	640.928	428.188	438.797	449.689	448.185	456.528	675.924	559.698	64.9279	0.0353118	(1)	0.0706833	(1)	0.0658505	(1)	0.0353715	(1)	0.0305386	(1)	-0.00483289	(1)	0.566158	(0.717)	0.293945	(1)	0.489459	(1)	-0.272213	(1)	-0.0766986	(1)	0.195514	(1)
LOC726016	chromosome transmission fidelity protein 8	50.3518	57.8747	71.0595	66.6128	68.7181	74.2949	68.1582	80.418	74.6358	39.6503	57.1807	51.1991	56.9476	71.141	51.0253	54.1133	68.8362	71.5649	74.2881	57.1434	54.19	64.4439	51.2533	0.347184	(1)	0.402092	(1)	0.457149	(1)	0.0549076	(1)	0.109965	(1)	0.055057	(1)	-0.0765537	(1)	0.164493	(1)	-0.163364	(1)	0.241046	(1)	-0.0868106	(1)	-0.327857	(1)
LOC408301	transmembrane protein 55B-like	620.334	510.211	548.434	593.459	534.087	533.573	574.476	556.529	475.047	505.761	519.391	524.53	443.717	469.531	490.341	565.273	57.9466	533.83	565.527	49.4445	521.965	456.624	49.3495	0.0144082	(1)	-0.0825676	(1)	0.000586265	(1)	-0.0969757	(1)	-0.0138219	(1)	0.0831538	(1)	0.0899699	(1)	-0.102965	(1)	-0.000185499	(1)	-0.192935	(1)	-0.0901554	(1)	0.102779	(1)
LOC100577466	hypothetical protein LOC100577466	120.844	133.264	150.318	172.155	120.039	143.765	150.922	145.301	147.254	111.902	115.95	132.7	122.2	137.539	115.74	127.543	161.237	131.923	148.111	129.578	124.325	129.87	115.744	0.343735	(1)	0.0540249	(1)	0.221236	(1)	-0.28971	(1)	-0.122499	(1)	0.167211	(1)	-0.0597089	(1)	0.00324216	(1)	-0.16293	(1)	0.0629511	(1)	-0.103221	(1)	-0.166172	(1)
LOC410237	hypothetical protein LOC410237	1420.93	1388.99	1279.07	1349.56	1383.93	1183.89	1421.59	1227.29	3108.48	2436.29	2609.66	2310.23	3157.03	2746.99	3335.31	144.97	1314.31	1283.91	1324.44	2772.38	2459.95	2952.12	3335.31	-0.0962194	(1)	-0.129984	(1)	-0.085151	(1)	-0.0337645	(1)	0.0110683	(1)	0.0448328	(1)	-0.172501	(1)	0.0905713	(1)	0.266695	(1)	0.263072	(1)	0.439196	(1)	0.176124	(1)
Hil (LOC410236)	hypothetical protein LOC410236 isoform 1	431.012	581.793	390.827	323.548	610.634	274.988	527.739	322.586	862.346	747.187	724.288	731.416	949.127	794.882	726.8	56.4246	357.188	442.818	425.163	84.7667	727.852	872.449	726.8	-0.503602	(1)	-0.193594	(1)	-0.25227	(1)	0.310008	(1)	0.251332	(1)	-0.058676	(1)	-0.144925	(1)	0.115765	(1)	-0.147013	(1)	0.26069	(1)	-0.0020879	(1)	-0.262778	(1)
Toll-10 (LOC410235)	protein slit	67.4714	75.3895	89.2799	72.6685	111.341	55.9624	108.079	38.3813	153.306	116.307	46.0622	123.296	92.5399	103.392	80.8938	71.4345	8.97429	83.6515	73.2337	134.867	84.6795	97.9657	8.89381	0.180923	(1)	0.227853	(1)	0.0359029	(1)	0.0469294	(1)	-0.14502	(1)	-0.19195	(1)	-0.670815	(1)	-0.460543	(1)	-0.736791	(1)	0.210272	(1)	-0.0659757	(1)	-0.276248	(1)
LOC100578455		39.2744	45.6906	32.7967	33.7389	39.1432	28.9461	36.0265	39.2952	51.4382	68.7271	85.771	62.6928	94.9127	65.4497	62.226	42.4825	33.2678	34.4463	37.6682	6.82659	74.2319	8.18122	62.2269	-0.352741	(1)	-0.319441	(1)	-0.173804	(1)	0.0332999	(1)	0.178937	(1)	0.145637	(1)	0.305091	(1)	0.416315	(1)	0.0505691	(1)	0.111224	(1)	-0.254522	(1)	-0.365746	(1)
RabGAP3 (LOC412306)	TBC1 domain family member 14	46.3237	118.795	60.1273	110.733	109.601	67.5408	63.2897	94.1256	108.928	89.8739	66.7108	137.924	132.878	66.3983	80.8938	82.5596	85.4312	88.5789	78.7769	99.4939	12.3175	99.6389	8.89381	0.049309	(1)	0.101397	(1)	-0.0689312	(1)	0.0520879	(1)	-0.11824	(1)	-0.170328	(1)	0.0417215	(1)	0.00343671	(1)	-0.29723	(1)	-0.0382848	(1)	-0.338952	(1)	-0.300667	(1)
LOC409427	peptidyl-prolyl cis-trans isomerase E-like	1591.12	1707.3	1709.98	1607.36	1639.67	1688.52	1576.4	1675.07	1724.69	1791.31	2210.99	1865.11	1900.63	1935.98	1894.16	1649.21	1658.68	1664.93	1625.74	1758.16	238.487	1918.35	1894.16	0.0082516	(1)	0.01296	(1)	-0.0206829	(1)	0.00470839	(1)	-0.0289345	(1)	-0.0336429	(1)	0.213252	(1)	0.125896	(1)	0.107622	(1)	-0.0873563	(1)	-0.105631	(1)	-0.0182743	(1)
Ssadh (LOC412305)	succinate-semialdehyde dehydrogenase,	177.238	213.223	245.064	215.41	258.345	227.709	218.106	265.928	205.753	206.181	128.657	201.662	173.216	204.886	145.609	195.236	23.2372	243.28	242.17	25.9678	165.159	189.587	145.689	0.237942	(1)	0.315938	(1)	0.309929	(1)	0.0779961	(1)	0.0719871	(1)	-0.00600892	(1)	-0.318556	(1)	-0.123639	(1)	-0.500316	(1)	0.194917	(1)	-0.181759	(1)	-0.376676	(1)
LOC412304	dehydrogenase/reductase SDR family member	1485.38	1472	1719.09	1662.72	1563.99	1638.35	1544.27	1594.65	1158.87	1370.14	1142.03	1130.56	1276.58	1206.55	945.835	1478.69	169.992	161.168	1569.46	1264.55	1136.29	1241.56	945.835	0.193481	(1)	0.114807	(1)	0.0859514	(1)	-0.0786746	(1)	-0.10753	(1)	-0.0288552	(1)	-0.154238	(1)	-0.0264142	(1)	-0.418911	(1)	0.127823	(1)	-0.264674	(1)	-0.392497	(1)
LOC551499	FIT family protein CG10671-like	754.27	767.602	800.786	737.931	722.844	708.214	721.503	748.436	644.49	726.921	695.698	754.404	581.34	627.938	591.147	76.936	769.359	715.529	734.969	685.759	725.596	64.6397	591.148	0.0158814	(1)	-0.0887646	(1)	-0.0500907	(1)	-0.104646	(1)	-0.0659721	(1)	0.0386738	(1)	0.0804923	(1)	-0.181516	(1)	-0.214073	(1)	-0.262008	(1)	-0.294565	(1)	-0.0325571	(1)
LOC409497	hypothetical protein LOC409497	2064.42	2106.34	1822.95	1918.79	1771.01	1969.3	1891.88	1869.72	1743.86	1689.1	1632.83	1558.96	1693	1602.1	1599.21	285.381	187.872	187.155	188.798	1716.48	1595.89	1647.55	1599.28	-0.156599	(1)	-0.157153	(1)	-0.148966	(1)	-0.000553227	(1)	0.00763364	(1)	0.00818687	(1)	-0.105087	(1)	-0.0591293	(1)	-0.102094	(1)	0.0459579	(1)	0.00299344	(1)	-0.0429644	(1)
LOC725612	WASH complex subunit strumpellin-like	496.469	538.387	511.082	542.418	617.593	563.484	522.871	582.117	427.643	489.02	400.265	479.6	468.631	410.721	383.312	517.428	526.752	59.539	552.494	458.331	439.932	439.677	383.312	0.0257605	(1)	0.190672	(1)	0.0945996	(1)	0.164911	(1)	0.0688391	(1)	-0.0960721	(1)	-0.0591095	(1)	-0.0599504	(1)	-0.257871	(1)	-0.000840904	(1)	-0.198762	(1)	-0.197921	(1)
LOC100578811	transmembrane protein 223-like	1.00704	2.28453	0	0	2.60955	3.85948	1.94738	1.82768	0	6.16782	1.58835	2.08976	2.37282	8.53692	2.48904	1.64578		3.23451	1.88753	3.83993	1.83956	5.45487	2.48944			0.974774	(1)	0.197725	(1)					-0.777049	(1)	-0.745794	(1)	0.822784	(1)	-0.309171	(1)	1.56858	(1)	0.436624	(1)	-1.13196	(1)
LOC725577	hypothetical protein LOC725577	278.949	275.666	325.234	275.967	291.399	276.917	268.738	254.962	241.054	283.72	281.138	238.233	302.534	300.689	271.305	277.378	3.66312	284.158	261.85	262.387	259.686	31.6117	271.355	0.11636	(1)	0.0352072	(1)	-0.0827484	(1)	-0.0811527	(1)	-0.199108	(1)	-0.117956	(1)	-0.0149284	(1)	0.200999	(1)	0.0482238	(1)	0.215927	(1)	0.0631522	(1)	-0.152775	(1)
LOC725536	Sjoegren syndrome nuclear autoantigen 1 homolog	13.0915	11.4226	10.9322	16.4369	20.8764	14.473	16.5527	19.1907	16.1375	16.7412	19.0602	28.2118	16.6097	26.5593	21.1568	12.2576	13.6846	17.6747	17.8717	16.4393	23.636	21.5845	21.1568	0.158938	(1)	0.528073	(1)	0.544063	(1)	0.369135	(1)	0.385125	(1)	0.0159895	(1)	0.523833	(1)	0.392844	(1)	0.363971	(1)	-0.130989	(1)	-0.159861	(1)	-0.0288723	(1)
LOC551589	beta-1,3-galactosyltransferase brn-like	3.02111	5.33057	3.64408	6.92081	8.69849	3.85948	4.86844	8.22457	15.1289	9.69229	6.35341	11.4937	14.2369	11.3826	7.46712	4.17584	5.28244	6.27898	6.54656	12.4158	8.92355	12.8973	7.46712	0.33914	(1)	0.588465	(1)	0.648659	(1)	0.249325	(1)	0.30952	(1)	0.0601944	(1)	-0.475882	(1)	0.0456692	(1)	-0.732947	(1)	0.521551	(1)	-0.257065	(1)	-0.778616	(1)
Cdc27 (LOC409522)	LOW QUALITY PROTEIN: cell division cycle protein	223.562	279.474	219.556	269.912	243.558	231.569	229.79	240.34	237.019	260.811	193.779	265.4	228.977	188.761	204.101	251.519	244.734	237.563	235.653	248.915	229.589	28.8688	24.1132	-0.0394496	(1)	-0.0823511	(1)	-0.0976002	(1)	-0.0429015	(1)	-0.0581506	(1)	-0.0152491	(1)	-0.116597	(1)	-0.253055	(1)	-0.286367	(1)	-0.136458	(1)	-0.16977	(1)	-0.0333117	(1)
LOC411691	phosphotriesterase-related protein-like	876.122	699.066	900.087	912.682	869.849	1063.29	805.24	773.11	816.96	726.921	805.294	619.614	839.977	811.008	769.113	787.594	96.3845	966.567	789.175	771.945	712.454	825.492	769.113	0.202672	(1)	0.295418	(1)	0.00289347	(1)	0.0927469	(1)	-0.199778	(1)	-0.292525	(1)	-0.115692	(1)	0.0967651	(1)	-0.00529327	(1)	0.212457	(1)	0.110399	(1)	-0.102058	(1)
LOC724839	ras-related protein Rab-32-like	1690.81	1446.87	1544.18	1519.12	1263.02	1490.72	1470.27	1363.45	1109.45	1119.02	1099.14	978.008	943.195	1130.67	935.879	1568.84	1531.65	1376.87	1416.86	1114.23	138.574	136.931	935.879	-0.0346146	(1)	-0.188305	(1)	-0.147002	(1)	-0.153691	(1)	-0.112387	(1)	0.0413034	(1)	-0.10145	(1)	-0.103733	(1)	-0.251659	(1)	-0.00228348	(1)	-0.15021	(1)	-0.147926	(1)
LOC409159	G-protein coupled receptor moody-like isoform 1	106.746	107.373	105.678	106.407	101.772	111.925	114.895	117.886	123.048	100.447	138.187	98.2188	131.691	114.774	181.7	17.5936	16.4286	16.8486	116.394	111.748	118.227	123.233	181.7	-0.0137635	(1)	-0.00284342	(1)	0.120561	(1)	0.0109201	(1)	0.134324	(1)	0.123404	(1)	0.0810166	(1)	0.141139	(1)	0.701312	(1)	0.0601229	(1)	0.620295	(1)	0.560172	(1)
LOC100577758		136.957	89.0966	129.365	102.947	86.9849	117.714	128.527	90.4703	149.272	111.902	131.833	79.4109	90.167	101.495	114.496	113.268	116.156	12.3495	19.4986	13.5867	15.6226	95.8378	114.496	0.0393978	(1)	-0.143161	(1)	-0.0457527	(1)	-0.182559	(1)	-0.0851506	(1)	0.0974086	(1)	-0.306097	(1)	-0.446447	(1)	-0.189713	(1)	-0.14035	(1)	0.116384	(1)	0.256734	(1)
SCR-B7 (LOC413995)	lysosome membrane protein 2	10.0704	6.85359	5.46612	5.19061	7.82864	4.82435	2.92107	2.74152	6.05155	5.2867	11.1185	6.26928	7.11845	6.63983	9.95616	8.46198	5.32836	6.32649	2.83129	5.66913	8.69387	6.87914	9.95616	-0.667302	(1)	-0.419589	(1)	-1.57953	(1)	0.247714	(1)	-0.91223	(1)	-1.15994	(1)	0.616872	(1)	0.279101	(1)	0.812463	(1)	-0.337771	(1)	0.195591	(1)	0.533362	(1)
LOC100576193	zinc finger protein 512B-like	25.1759	31.9834	25.5086	20.7624	20.8764	26.0515	31.158	14.6215	28.2406	29.0769	34.9437	24.0322	36.7787	37.9419	21.1568	28.5797	23.1355	23.4639	22.8897	28.6587	29.488	37.3627	21.1568	-0.304881	(1)	-0.284545	(1)	-0.320287	(1)	0.0203364	(1)	-0.0154063	(1)	-0.0357427	(1)	0.0411537	(1)	0.382531	(1)	-0.43785	(1)	0.341377	(1)	-0.479003	(1)	-0.82038	(1)
LOC100577839	zinc finger protein 512B-like	15.1055	11.4226	18.2204	10.3812	15.6573	10.6136	6.81582	12.7938	16.1375	22.0279	12.7068	13.5834	26.101	26.5593	14.9342	13.265	14.3832	13.1354	9.84797	19.827	13.1451	26.3315	14.9342	0.10857	(1)	-0.014064	(1)	-0.435967	(1)	-0.122634	(1)	-0.544536	(1)	-0.421903	(1)	-0.537737	(1)	0.46445	(1)	-0.353641	(1)	1.00219	(1)	0.184096	(1)	-0.818092	(1)
LOC100577877	hypothetical protein LOC100577877	189.323	187.331	230.488	219.736	205.284	205.517	215.185	213.839	194.658	237.02	204.897	206.886	247.959	234.291	228.992	188.327	225.112	25.4716	214.512	215.839	25.8919	241.125	228.992	0.257401	(1)	0.125201	(1)	0.187818	(1)	-0.132201	(1)	-0.0695836	(1)	0.062617	(1)	-0.0680712	(1)	0.159825	(1)	0.0853374	(1)	0.227896	(1)	0.153409	(1)	-0.0744871	(1)
LOC410155		727.08	645.76	623.137	645.365	621.942	639.708	686.45	574.806	671.722	689.915	501.919	585.133	557.612	626.041	644.661	686.422	634.251	63.8255	63.6282	68.8185	543.526	591.826	644.661	-0.114037	(1)	-0.121852	(1)	-0.122302	(1)	-0.00781491	(1)	-0.0082652	(1)	-0.000450293	(1)	-0.324921	(1)	-0.202096	(1)	-0.0787284	(1)	0.122825	(1)	0.246192	(1)	0.123368	(1)
LOC412607	hypothetical protein LOC412607	1082.56	1280.86	1024.9	1225.85	1152.55	1029.52	1116.82	1183.42	1104.41	1089.06	903.772	1135.79	900.484	934.319	906.011	1181.71	1125.37	191.325	115.122	196.734	119.779	917.413	96.1696	-0.0704752	(1)	-0.115184	(1)	-0.0390906	(1)	-0.0447088	(1)	0.0313846	(1)	0.0760934	(1)	-0.104958	(1)	-0.257589	(1)	-0.275614	(1)	-0.152631	(1)	-0.170656	(1)	-0.0180249	(1)
LOC725193	G patch domain-containing protein 2-like	498.483	487.366	511.993	432.551	437.534	433.226	410.896	462.404	343.93	404.433	433.62	369.888	401.006	382.264	331.042	492.925	472.272	435.388	436.656	374.181	41.7539	391.635	331.424	-0.0617496	(1)	-0.179092	(1)	-0.174889	(1)	-0.117342	(1)	-0.11314	(1)	0.0042021	(1)	0.102575	(1)	0.0657731	(1)	-0.176722	(1)	-0.0368015	(1)	-0.279296	(1)	-0.242495	(1)
LOC725240	mitochondrial import inner membrane translocase	74.5207	89.8581	104.767	81.3195	95.6834	128.328	93.4741	119.713	141.203	163.007	216.016	145.238	169.656	148.922	153.076	82.1894	93.4338	112.548	16.5936	152.148	18.6271	159.289	153.76	0.178951	(1)	0.446545	(1)	0.375097	(1)	0.267594	(1)	0.196146	(1)	-0.071448	(1)	0.247949	(1)	0.0665825	(1)	0.0091826	(1)	-0.181367	(1)	-0.238767	(1)	-0.0573999	(1)
LOC100576223	hypothetical protein LOC100576223	2.01407	0.76151	5.46612	0	0	3.85948	0	2.74152	0	0	0	6.26928	1.18641	4.74273	2.48904	1.38779	2.7336	1.92974	1.37762		3.13464	2.96457	2.48944	0.977726	(1)	0.475614	(1)	-0.0178128	(1)	-0.502112	(1)	-0.995539	(1)	-0.493427	(1)							-0.0804768	(1)	-0.332711	(1)	-0.252234	(1)
LOC409876	interferon regulatory factor 2-binding protein	2111.76	2515.27	1899.48	2360.86	2317.28	1779.22	1995.09	2239.82	2124.1	2010.71	1636	2100.21	1446.23	1515.78	1724.9	2313.52	213.168	248.248	2117.46	267.419	1868.17	1481.49	1724.95	-0.119116	(1)	-0.175693	(1)	-0.127752	(1)	-0.0565771	(1)	-0.00863547	(1)	0.0479417	(1)	-0.146243	(1)	-0.481243	(1)	-0.261302	(1)	-0.335	(1)	-0.115059	(1)	0.219941	(1)
LOC100577911	hypothetical protein LOC100577911	7.04925	11.4226	5.46612	10.3812	2.60955	10.6136	2.92107	6.39689	15.1289	5.2867	4.76506	6.26928	11.8641	3.79419	17.4233	9.23595	7.92367	6.61155	4.65898	1.27792	5.51717	7.82914	17.4233	-0.221092	(1)	-0.482271	(1)	-0.987247	(1)	-0.261179	(1)	-0.766155	(1)	-0.504976	(1)	-0.887671	(1)	-0.382746	(1)	0.771346	(1)	0.504925	(1)	1.65902	(1)	1.15409	(1)
LOC100576344	hypothetical protein LOC100576344	0	0.76151	1.82204	0.865101	1.7397	0	0.973688	2.74152	2.01718	0.881117	0	2.08976	2.37282	0.948547	2.48904	0.387548	1.34357	0.869849	1.85766	1.44916	1.44884	1.66682	2.48944	1.81914	(1)	1.1919	(1)	2.28651	(1)	-0.627235	(1)	0.467373	(1)	1.09461	(1)	-0.47187	(1)	0.196568	(1)	0.780382	(1)	0.668438	(1)	1.25225	(1)	0.583814	(1)
LOC551726	inositol-tetrakisphosphate 1-kinase-like	182.274	183.524	227.755	175.616	219.202	185.255	228.817	258.617	238.028	202.657	235.076	253.906	223.045	219.114	235.214	182.899	21.6852	22.2284	243.717	22.3423	244.491	221.796	235.214	0.14106	(1)	0.144941	(1)	0.414161	(1)	0.00388014	(1)	0.273101	(1)	0.269221	(1)	0.150035	(1)	0.00481898	(1)	0.0942293	(1)	-0.145216	(1)	-0.0558056	(1)	0.0894103	(1)
crn (LOC551756)	protein crooked neck	365.554	332.018	389.005	326.143	334.892	320.337	379.738	341.777	331.827	402.67	387.558	417.952	378.464	413.566	380.823	348.786	357.574	327.614	36.7575	367.249	42.7552	396.154	38.8232	0.0358999	(1)	-0.0903453	(1)	0.0486865	(1)	-0.126245	(1)	0.0127866	(1)	0.139032	(1)	0.133145	(1)	0.108799	(1)	0.0523642	(1)	-0.0243462	(1)	-0.0807813	(1)	-0.0564351	(1)
bbx (LOC551787)	hypothetical protein LOC551787	1681.75	1905.3	1754.62	1804.6	1301.29	1567.91	1749.72	1613.84	961.188	1074.96	1053.08	1123.25	786.589	885.943	821.383	1793.52	1779.61	1434.63	1681.79	118.755	188.162	836.266	821.383	-0.011234	(1)	-0.322145	(1)	-0.0928074	(1)	-0.310911	(1)	-0.0815734	(1)	0.229338	(1)	0.0960487	(1)	-0.283811	(1)	-0.309717	(1)	-0.37986	(1)	-0.405766	(1)	-0.0259059	(1)
LOC724141	protein yippee-like 5-like	780.453	682.313	643.18	613.357	653.256	639.708	654.319	650.655	796.788	770.096	878.359	629.018	820.995	735.124	789.026	731.383	628.268	646.482	652.487	783.442	753.688	778.592	789.258	-0.219246	(1)	-0.178016	(1)	-0.164678	(1)	0.0412302	(1)	0.0545678	(1)	0.0133376	(1)	-0.0558584	(1)	-0.00994651	(1)	0.010246	(1)	0.0459119	(1)	0.0661044	(1)	0.0201925	(1)
LOC409472	protein Smaug homolog 2-like	612.278	809.485	696.019	865.966	780.254	758.387	792.582	791.386	858.312	698.726	953.011	870.385	1009.63	854.641	978.193	71.8814	78.9926	769.327	791.984	778.519	911.698	932.137	978.193	0.1357	(1)	0.113976	(1)	0.155863	(1)	-0.0217237	(1)	0.0201631	(1)	0.0418868	(1)	0.227825	(1)	0.25981	(1)	0.329387	(1)	0.0319858	(1)	0.101562	(1)	0.0695767	(1)
LOC413683	arf-GAP with SH3 domain, ANK repeat and PH	750.242	811.769	692.375	798.488	875.068	711.108	680.608	848.045	897.647	859.089	738.584	987.412	842.35	783.5	774.092	781.569	745.432	793.883	764.326	878.368	862.998	812.925	774.916	-0.0672571	(1)	0.0221483	(1)	-0.0311443	(1)	0.0894053	(1)	0.0361128	(1)	-0.0532925	(1)	-0.0254686	(1)	-0.111704	(1)	-0.182321	(1)	-0.086235	(1)	-0.156853	(1)	-0.0706177	(1)
LOC410024	40S ribosomal protein S19a-like	8498.38	6645.69	7851.17	7464.96	6563.01	7731.5	8055.32	6291.8	6054.58	5795.99	8783.59	6098.97	5975.94	6839.02	6807.53	7572.37	7658.62	7147.25	7173.56	5925.28	7441.28	647.49	687.525	0.0162979	(1)	-0.0832928	(1)	-0.0779923	(1)	-0.0995906	(1)	-0.0942901	(1)	0.0053005	(1)	0.328666	(1)	0.112873	(1)	0.200246	(1)	-0.215793	(1)	-0.12842	(1)	0.0873732	(1)
LOC410023	protein ETHE1, mitochondrial-like	1621.33	1616.68	1622.53	1500.09	1385.67	1486.86	1677.67	1529.77	1097.35	1157.79	1289.74	1103.39	1068.95	1194.22	984.415	1619.68	1561.36	1436.27	163.718	1127.57	1196.57	1131.59	984.415	-0.052356	(1)	-0.172786	(1)	-0.0136889	(1)	-0.12043	(1)	0.0386671	(1)	0.159097	(1)	0.0856877	(1)	0.00513344	(1)	-0.195875	(1)	-0.0805543	(1)	-0.281563	(1)	-0.201009	(1)
Appl (LOC551733)	beta amyloid protein precursor-like isoform 1	2921.41	2680.51	2971.75	2776.11	3548.98	2908.12	2776.96	2821.03	3036.87	2428.36	1810.72	2111.7	2495.02	2462.43	2281.21	28.9632	2873.93	3228.55	2798.99	2732.61	1961.21	2478.72	2281.26	0.0371007	(1)	0.204963	(1)	-0.00101497	(1)	0.167862	(1)	-0.0381157	(1)	-0.205978	(1)	-0.478536	(0.756)	-0.140685	(1)	-0.260486	(1)	0.337851	(1)	0.218051	(1)	-0.1198	(1)
LOC413702	hormone-sensitive lipase-like	460.216	485.843	439.111	482.726	393.172	457.348	471.265	425.85	304.595	304.866	324.024	313.464	319.144	298.792	268.816	473.294	46.9189	425.26	448.558	34.7365	318.744	38.9686	268.816	-0.0374168	(1)	-0.153585	(1)	-0.0766367	(1)	-0.116169	(1)	-0.0392199	(1)	0.0769487	(1)	0.0648634	(1)	0.0199231	(1)	-0.180914	(1)	-0.0449403	(1)	-0.245777	(1)	-0.200837	(1)
LOC724486	probable N-acetyltransferase san-like	203.421	166.009	224.111	185.997	210.503	188.149	188.896	235.771	225.925	236.139	271.608	259.13	261.01	235.24	216.547	184.715	25.5378	199.326	212.333	231.32	265.369	248.125	216.547	0.1507	(1)	0.10983	(1)	0.201028	(1)	-0.0408693	(1)	0.0503281	(1)	0.0911974	(1)	0.199909	(1)	0.102973	(1)	-0.0934157	(1)	-0.0969357	(1)	-0.293324	(1)	-0.196389	(1)
PPWD1 (LOC413544)	peptidylprolyl isomerase domain and WD	328.294	309.173	359.853	309.706	299.228	322.266	384.607	339.949	362.085	373.594	370.086	305.105	341.686	381.316	375.845	318.733	334.779	31.7471	362.278	367.84	337.596	361.573	375.846	0.0708609	(1)	-0.0366091	(1)	0.184747	(1)	-0.10747	(1)	0.113886	(1)	0.221356	(1)	-0.123779	(1)	-0.0250762	(1)	0.0310634	(1)	0.0987027	(1)	0.154842	(1)	0.0561396	(1)
LOC724499	brain protein 44-like	2.01407	6.85359	2.73306	5.19061	3.4794	5.78921	3.89475	2.74152	2.01718	5.2867	6.35341	6.26928	3.55923	4.74273	3.73356	4.43383	3.96183	4.63435	3.31814	3.65194	6.31135	4.1598	3.73357	-0.162385	(1)	0.0637996	(1)	-0.418179	(1)	0.226185	(1)	-0.255794	(1)	-0.481979	(1)	0.789283	(1)	0.184788	(1)	0.031888	(1)	-0.604496	(1)	-0.757395	(1)	-0.1529	(1)
LOC409903	hypothetical protein LOC409903	269.886	320.596	192.225	290.674	361.857	196.833	294.054	206.528	481.098	390.335	341.496	388.696	514.901	420.206	433.093	295.247	241.45	279.345	25.2999	435.717	365.956	467.554	433.932	-0.29017	(1)	-0.0798423	(1)	-0.238285	(1)	0.210327	(1)	0.0518846	(1)	-0.158443	(1)	-0.255116	(1)	0.101742	(1)	-0.00871323	(1)	0.356858	(1)	0.246403	(1)	-0.110455	(1)
LOC100576890	hypothetical protein LOC100576890	2.01407	1.52302	3.64408	5.19061	2.60955	0.964869	3.89475	0.913841	2.01718	0	1.58835	0	1.18641	5.69128	2.48904	1.76855	4.41734	1.78728	2.44297	1.85922	0.794176	3.43884	2.48944	1.32061	(1)	0.0151436	(1)	0.443052	(1)	-1.30547	(1)	-0.877563	(1)	0.427908	(1)	-0.344812	(1)	1.76958	(1)	1.30325	(1)	2.11439	(1)	1.64806	(1)	-0.466334	(1)
DEG5 (LOC724767)	sodium channel protein Nach	118.83	127.172	139.386	105.542	114.82	98.4166	142.159	86.8149	271.311	223.804	265.255	240.322	244.4	342.425	299.929	123.122	122.464	16.6183	114.487	247.557	252.789	293.413	299.929	-0.00631269	(1)	-0.206217	(1)	-0.103492	(1)	-0.199904	(1)	-0.0971796	(1)	0.102724	(1)	0.030168	(1)	0.245168	(1)	0.276859	(1)	0.215	(1)	0.246691	(1)	0.0316911	(1)
LOC412569	probable 2-oxoglutarate dehydrogenase E1	5.03518	6.85359	26.4196	5.19061	10.4382	14.473	4.86844	16.4491	0	1.76223	4.76506	1.04488	20.1689	7.58838	7.46712	5.94438	15.8589	12.4556	1.6588	0.881117	2.94968	13.8787	7.46712	1.41079	(1)	1.0672	(1)	0.842445	(1)	-0.343593	(1)	-0.568345	(1)	-0.224752	(1)	1.72112	(1)	3.97739	(1)	3.08315	(1)	2.25627	(1)	1.36203	(1)	-0.894244	(1)
Sirt2 (LOC409532)	NAD-dependent deacetylase sirtuin-2	620.334	596.262	533.858	509.545	554.094	518.135	576.424	601.307	604.147	687.271	608.339	590.357	597.95	626.041	601.103	68.2982	521.713	536.114	588.865	645.789	599.348	611.995	61.1325	-0.221556	(1)	-0.182238	(1)	-0.0468407	(1)	0.0393171	(1)	0.174715	(1)	0.135398	(1)	-0.10749	(1)	-0.0773632	(1)	-0.103271	(1)	0.0301266	(1)	0.00421862	(1)	-0.0259079	(1)
LOC100577192	3-hydroxyacyl-CoA dehydratase 2-like	97.6825	111.18	108.411	79.5893	136.566	95.522	108.079	139.818	155.323	148.909	169.954	151.508	187.453	179.275	159.299	14.4315	94.3196	116.442	123.949	152.116	16.7366	183.364	159.299	-0.151819	(1)	0.152117	(1)	0.247185	(1)	0.303936	(1)	0.399004	(1)	0.0950676	(1)	0.0794735	(1)	0.269538	(1)	0.0665618	(1)	0.190065	(1)	-0.0129117	(1)	-0.202977	(1)
LOC412233	pseudouridine-metabolizing bifunctional protein	190.33	145.448	188.581	179.076	172.23	211.306	163.58	159.008	184.572	217.636	177.895	167.181	186.266	198.246	170.499	167.889	183.828	191.768	161.294	21.1412	172.538	192.256	17.4993	0.130852	(1)	0.191855	(1)	-0.0578159	(1)	0.061003	(1)	-0.188668	(1)	-0.249671	(1)	-0.221027	(1)	-0.0649125	(1)	-0.238177	(1)	0.156115	(1)	-0.0171498	(1)	-0.173265	(1)
LOC100577343	hypothetical protein LOC100577343	43.3026	58.6362	87.4579	115.058	80.0261	55.9624	93.4741	65.7966	96.8249	66.9649	135.01	67.9172	74.7437	53.1186	82.1383	5.96943	11.2582	67.9942	79.6353	81.8949	11.4636	63.9312	82.1383	0.990335	(1)	0.415781	(1)	0.643777	(1)	-0.574554	(1)	-0.346558	(1)	0.227996	(1)	0.309117	(1)	-0.357253	(1)	0.00428263	(1)	-0.66637	(1)	-0.304834	(1)	0.361536	(1)
pck (LOC551488)	hypothetical protein LOC551488	835.84	807.2	833.583	787.242	765.467	805.666	814.977	750.264	862.346	861.732	932.363	822.321	942.008	980.797	940.857	821.523	81.4125	785.566	782.624	862.393	877.342	961.429	94.8573	-0.0196397	(1)	-0.064563	(1)	-0.0699834	(1)	-0.0449233	(1)	-0.0503437	(1)	-0.00542041	(1)	0.0253852	(1)	0.157387	(1)	0.126222	(1)	0.132002	(1)	0.100837	(1)	-0.0311652	(1)
LOC551516	hypothetical protein LOC551516	399.793	357.148	393.561	370.263	426.226	400.421	430.37	344.518	485.133	414.125	427.267	400.189	511.342	488.502	520.209	378.477	381.912	413.323	387.444	449.629	413.728	499.922	52.2944	0.013058	(1)	0.127089	(1)	0.0338067	(1)	0.114031	(1)	0.0207487	(1)	-0.0932822	(1)	-0.120052	(1)	0.152968	(1)	0.210358	(1)	0.27302	(1)	0.33041	(1)	0.0573901	(1)
LOC727266	hypothetical protein LOC727266	194.358	194.185	187.67	177.346	193.976	198.763	187.922	164.491	231.976	200.014	219.193	157.777	232.536	238.085	268.816	194.271	182.579	196.37	176.266	215.995	188.485	235.317	268.816	-0.0901154	(1)	0.0154978	(1)	-0.140806	(1)	0.105613	(1)	-0.0506906	(1)	-0.156304	(1)	-0.196549	(1)	0.12357	(1)	0.315624	(1)	0.320119	(1)	0.512173	(1)	0.192054	(1)
phr (LOC551610)	deoxyribodipyrimidine photo-lyase	113.795	129.457	125.721	129.765	132.217	138.941	141.185	139.818	132.126	137.454	152.482	131.655	141.183	150.819	153.076	121.626	127.743	135.58	14.5125	134.79	142.684	146.775	153.76	0.0707933	(1)	0.156684	(1)	0.208133	(1)	0.0858911	(1)	0.137339	(1)	0.0514484	(1)	0.0758728	(1)	0.115264	(1)	0.183535	(1)	0.0393907	(1)	0.107663	(1)	0.0682719	(1)
LOC411711	integrator complex subunit 6-like	192.344	254.344	174.916	213.68	209.634	164.028	179.159	185.51	182.555	202.657	147.717	182.854	237.282	165.996	168.01	223.345	194.298	186.837	182.334	192.663	165.285	21.6387	168.123	-0.200998	(1)	-0.257537	(1)	-0.292683	(1)	-0.0565389	(1)	-0.0916849	(1)	-0.035146	(1)	-0.220694	(1)	0.0661196	(1)	-0.197104	(1)	0.286813	(1)	0.0235897	(1)	-0.263223	(1)
stau (LOC551666)	double-stranded RNA-binding protein Staufen	5104.67	5546.07	5207.39	5889.61	5634.88	5163.98	5641.55	4907.33	4171.54	3765.89	3468.96	4151.31	3288.72	3492.55	3788.32	5325.37	5548.5	5399.43	5274.44	3968.72	381.135	339.637	3788.32	0.0592153	(1)	0.0199251	(1)	-0.0138645	(1)	-0.0392902	(1)	-0.0730798	(1)	-0.0337895	(1)	-0.0588299	(1)	-0.227116	(1)	-0.0671141	(1)	-0.168286	(1)	-0.00828423	(1)	0.160002	(1)
LOC412363	UPF0468 protein C16orf80 homolog	296.069	302.319	341.632	290.674	336.632	378.229	354.423	344.518	364.102	346.279	465.387	406.458	441.344	394.596	436.827	299.194	316.153	357.438	349.473	355.194	435.923	417.97	436.827	0.0795424	(1)	0.25658	(1)	0.224089	(1)	0.177037	(1)	0.144546	(1)	-0.0324911	(1)	0.29548	(1)	0.234806	(1)	0.298468	(1)	-0.0606743	(1)	0.002988	(1)	0.0636623	(1)
LOC727285	zinc finger protein weckle-like	25.1759	35.0294	28.2416	27.6832	22.6161	26.0515	19.4738	35.6398	18.1547	22.909	17.4719	25.0771	33.2194	37.9419	27.3794	3.12676	27.9624	24.3338	27.5568	2.53185	21.2746	35.5865	27.3794	-0.106402	(1)	-0.306932	(1)	-0.127484	(1)	-0.20053	(1)	-0.0210817	(1)	0.179448	(1)	0.0512617	(1)	0.793229	(1)	0.41523	(1)	0.741968	(1)	0.363968	(1)	-0.378	(1)
LOC550885	nicotinate phosphoribosyltransferase-like	3760.27	3112.29	3317.02	3559.89	3421.12	2652.42	3939.54	3153.67	2286.48	2161.38	3084.58	1964.38	1869.78	1951.16	2703.1	3436.28	3438.46	336.772	3546.64	2223.93	2524.48	191.473	273.978	0.000912807	(1)	-0.178311	(1)	0.04559	(1)	-0.179223	(1)	0.0446772	(1)	0.223901	(1)	0.182874	(1)	-0.219183	(1)	0.281503	(1)	-0.402057	(1)	0.098629	(1)	0.500686	(1)
TppII (LOC412055)	tripeptidyl-peptidase 2	3624.32	4043.62	3080.16	3561.62	3957.81	3465.81	3233.62	3637.09	1980.88	2348.18	1605.82	2178.58	1829.44	1872.43	1848.11	3833.97	332.889	3711.82	3435.35	2164.53	1892.2	185.937	1848.11	-0.207269	(1)	-0.0467158	(1)	-0.158381	(1)	0.160554	(1)	0.0488889	(1)	-0.111665	(1)	-0.193987	(1)	-0.225795	(1)	-0.227998	(1)	-0.0318089	(1)	-0.0340118	(1)	-0.00220294	(1)
LOC550726	DCN1-like protein 1-like	749.235	773.694	728.816	729.28	727.194	830.752	786.74	763.971	791.745	785.075	697.287	839.039	788.962	775.911	724.311	761.464	729.48	778.973	775.356	788.414	768.163	782.436	724.317	-0.0627629	(1)	0.0327966	(1)	0.0260816	(1)	0.0955595	(1)	0.0888446	(1)	-0.00671491	(1)	-0.0375341	(1)	-0.0109725	(1)	-0.122337	(1)	0.0265616	(1)	-0.0848032	(1)	-0.111365	(1)
LOC410001	hypothetical protein LOC410001	27.19	46.4521	28.2416	35.4691	53.0608	28.9461	29.2107	33.8121	41.3523	25.5524	15.8835	27.1669	21.3554	18.9709	28.624	36.8213	31.8554	41.3425	31.5114	33.4523	21.5253	2.16314	28.624	-0.208993	(1)	0.155214	(1)	-0.224657	(1)	0.364208	(1)	-0.0156637	(1)	-0.379871	(1)	-0.63608	(1)	-0.730386	(1)	-0.224883	(1)	-0.0943064	(1)	0.411197	(1)	0.505503	(1)
LOC100578824	zinc finger protein ZIC 5-like	267.872	212.461	237.776	249.149	197.456	256.655	272.633	261.359	438.738	400.027	244.606	287.342	399.82	345.271	302.418	24.1664	243.463	227.554	266.996	419.382	265.974	372.545	32.4185	0.0196657	(1)	-0.08099	(1)	0.152782	(1)	-0.100656	(1)	0.133116	(1)	0.233772	(1)	-0.65698	(0.550)	-0.17085	(1)	-0.47172	(1)	0.48613	(1)	0.18526	(1)	-0.30087	(1)
LOC100577759		74.5207	85.2891	71.9706	76.994	67.8482	88.768	77.8951	57.572	119.014	81.9439	76.2409	95.0841	135.251	140.385	103.295	79.9489	74.4823	78.3886	67.7335	1.47887	85.6626	137.818	13.2952	-0.101387	(1)	-0.0291225	(1)	-0.238414	(1)	0.0722641	(1)	-0.137027	(1)	-0.209291	(1)	-0.230156	(1)	0.455869	(1)	0.0398807	(1)	0.686026	(1)	0.270037	(1)	-0.415989	(1)
SP30 (LOC725241)	LOW QUALITY PROTEIN: hypothetical protein	56.394	118.034	53.7502	130.63	133.957	62.7165	65.2371	99.6087	127.083	63.4404	65.1224	174.495	115.082	79.6779	67.2041	87.2141	92.1929	98.3366	82.4229	95.2615	119.887	97.3798	67.2496	0.0800536	(1)	0.173169	(1)	-0.0815147	(1)	0.093115	(1)	-0.161568	(1)	-0.254683	(1)	0.330768	(1)	0.0317287	(1)	-0.503344	(1)	-0.299039	(1)	-0.834112	(1)	-0.535073	(1)
Clp (LOC412627)	cleavage and polyadenylation specificity factor	503.518	469.09	473.73	468.885	416.658	483.399	449.844	513.579	454.875	474.041	533.686	489.004	499.478	456.251	399.491	486.346	471.375	45.2849	481.711	464.458	511.345	477.864	399.5	-0.04519	(1)	-0.111842	(1)	-0.0136897	(1)	-0.0666523	(1)	0.0315003	(1)	0.0981526	(1)	0.138749	(1)	0.0410535	(1)	-0.217385	(1)	-0.0976958	(1)	-0.356134	(1)	-0.258439	(1)
LOC409548	drebrin-like protein-like	991.931	919.142	914.664	868.561	836.795	967.764	945.451	926.635	620.284	617.663	651.224	694.845	549.307	637.424	693.198	955.536	891.613	92.2791	936.432	618.974	673.349	593.365	693.198	-0.0998939	(1)	-0.0827372	(1)	-0.0297359	(1)	0.0171568	(1)	0.070158	(1)	0.0530013	(1)	0.120803	(1)	-0.0609573	(1)	0.163389	(1)	-0.181761	(1)	0.0425857	(1)	0.224346	(1)
LOC725142	u6 snRNA-associated Sm-like protein LSm2-like	110.774	101.281	127.543	106.407	106.122	131.222	89.5793	111.489	75.6444	108.377	139.775	108.668	99.6583	110.98	112.007	16.2739	116.976	118.672	1.53397	92.1895	124.221	15.3191	112.682	0.141764	(1)	0.162541	(1)	-0.0767539	(1)	0.0207767	(1)	-0.218518	(1)	-0.239295	(1)	0.433036	(1)	0.194891	(1)	0.28371	(1)	-0.238144	(1)	-0.149326	(1)	0.0888188	(1)
LOC551072		230.611	268.051	245.975	228.387	281.831	240.252	238.554	233.943	309.638	306.629	358.968	224.649	434.225	333.889	327.309	249.331	237.19	261.418	236.248	38.1332	291.884	384.57	327.389	-0.0720759	(1)	0.066216	(1)	-0.0777593	(1)	0.138292	(1)	-0.00568331	(1)	-0.143975	(1)	-0.0785328	(1)	0.317766	(1)	0.0870981	(1)	0.396299	(1)	0.165631	(1)	-0.230668	(1)
LOC100578852	ribonucleases P/MRP protein subunit POP1-like	64.4503	65.4898	52.8391	71.8034	70.4578	67.5408	60.3687	67.6242	109.937	87.2306	79.4176	89.8597	90.167	68.2954	70.9377	64.9779	62.3213	68.9993	63.9965	98.5836	84.6387	79.2313	7.93766	-0.060051	(1)	0.0868062	(1)	-0.0217833	(1)	0.146857	(1)	0.0382676	(1)	-0.108589	(1)	-0.22003	(1)	-0.315278	(1)	-0.474796	(1)	-0.095248	(1)	-0.254765	(1)	-0.159517	(1)
Pka-R2 (LOC409390)	cAMP-dependent protein kinase type II regulatory	236.654	360.194	241.42	387.565	387.953	247.006	267.764	275.98	566.829	386.81	325.612	435.715	417.616	308.278	268.816	298.424	314.493	317.48	271.872	476.82	38.6636	362.947	268.816	0.0756641	(1)	0.089301	(1)	-0.134434	(1)	0.0136368	(1)	-0.210098	(1)	-0.223735	(1)	-0.324927	(1)	-0.393686	(1)	-0.826822	(1)	-0.0687589	(1)	-0.501896	(1)	-0.433137	(1)
LOC100578890	hypothetical protein LOC100578890	9.06333	3.80755	9.1102	4.32551	11.308	6.75408	5.84213	6.39689	9.07733	10.5734	11.1185	11.4937	8.30486	7.58838	4.97808	6.43544	6.71785	9.31591	6.11959	9.82537	11.3675	7.94662	4.97887	0.0619615	(1)	0.488857	(1)	-0.0726224	(1)	0.426895	(1)	-0.134584	(1)	-0.561479	(1)	0.202515	(1)	-0.30617	(1)	-0.980922	(1)	-0.508685	(1)	-1.18344	(1)	-0.674751	(1)
LOC100578011	kinetochore protein NDC80 homolog	51.3589	59.3977	77.4367	64.0175	65.2387	58.857	67.1845	62.1412	58.4983	50.2237	41.2972	73.1416	58.134	61.6555	44.8027	55.3783	7.72775	62.4784	64.6628	54.3615	57.2194	59.8948	44.8273	0.352942	(1)	0.16406	(1)	0.223616	(1)	-0.188882	(1)	-0.129326	(1)	0.0595561	(1)	0.073932	(1)	0.139858	(1)	-0.278986	(1)	0.0659261	(1)	-0.352918	(1)	-0.418844	(1)
LOC551210	hypothetical protein LOC551210	144.006	149.256	160.339	153.988	137.436	146.66	135.343	152.611	125.065	176.223	135.01	155.687	131.691	173.584	176.722	146.631	157.164	142.482	143.978	15.6444	145.349	152.638	176.722	0.100078	(1)	-0.045811	(1)	-0.0263515	(1)	-0.145889	(1)	-0.126429	(1)	0.0194595	(1)	-0.0516304	(1)	0.0189643	(1)	0.230333	(1)	0.0705947	(1)	0.281964	(1)	0.211369	(1)
jim (LOC410222)	zinc finger protein 93	3.02111	2.28453	5.46612	1.7302	11.308	0.964869	7.78951	2.74152	10.0859	18.5035	1.58835	3.13464	4.74563	9.48547	4.97808	2.65282	3.59816	6.13645	5.26552	14.2947	2.3615	7.11555	4.97887	0.439733	(1)	1.20988	(1)	0.989048	(1)	0.770145	(1)	0.549315	(1)	-0.22083	(1)	-2.59771	(1)	-1.00643	(1)	-1.52182	(1)	1.59127	(1)	1.07589	(1)	-0.515386	(1)
LOC551282	ribokinase-like	3007.01	2666.81	3223.19	2742.37	2420.79	3170.56	3026.22	2786.3	1334.37	1586.89	1629.65	1537.02	1224.37	1807.93	1431.2	2836.99	2982.78	2795.67	296.263	146.629	1583.33	1516.15	1431.2	0.0723374	(1)	-0.0211233	(1)	0.0348453	(1)	-0.0934607	(1)	-0.0374921	(1)	0.0559686	(1)	0.116375	(1)	0.053824	(1)	-0.0293668	(1)	-0.0625514	(1)	-0.145742	(1)	-0.0831908	(1)
LOC409395	hypothetical protein LOC409395	2006.02	2440.64	2142.72	2442.18	2482.55	2282.88	2374.83	2251.7	1867.91	2123.49	1613.77	2204.7	1791.48	1825	1992.48	2223.33	2292.45	2382.71	2313.27	1995.72	199.232	188.244	1992.48	0.0441694	(1)	0.0998856	(1)	0.0572103	(1)	0.0557162	(1)	0.0130409	(1)	-0.0426753	(1)	-0.0639043	(1)	-0.14231	(1)	-0.00233352	(1)	-0.0784056	(1)	0.0615708	(1)	0.139976	(1)
LOC551361		2216.49	2640.15	2211.04	2555.51	2734.8	2388.05	2195.67	2323.9	1766.04	1594.82	1867.9	2164.99	1764.19	1787.06	1793.35	2428.32	2383.28	2561.43	2259.78	168.433	216.448	1775.63	1793.35	-0.0270124	(1)	0.0769894	(1)	-0.103775	(1)	0.104002	(1)	-0.0767624	(1)	-0.180764	(1)	0.262982	(1)	0.0794943	(1)	0.0938267	(1)	-0.183488	(1)	-0.169156	(1)	0.0143324	(1)
vir (LOC411612)	protein virilizer	503.518	542.195	502.883	559.72	618.463	514.275	574.476	549.219	623.31	611.495	487.624	563.191	537.443	600.43	586.169	522.857	531.316	566.369	561.847	617.425	525.473	568.937	586.17	0.023116	(1)	0.115327	(1)	0.103763	(1)	0.0922108	(1)	0.080647	(1)	-0.0115638	(1)	-0.232775	(1)	-0.117944	(1)	-0.0748947	(1)	0.114832	(1)	0.15788	(1)	0.0430488	(1)
Mtor (LOC412508)	LOW QUALITY PROTEIN: nucleoprotein TPR	1544.79	1564.9	1449.43	1603.9	1748.4	1514.84	1480.98	1552.62	1971.8	1863.56	1663	1887.05	1765.38	1701.69	1772.2	1554.85	1526.66	1631.62	1516.8	1917.68	1775.29	1733.53	1772.2	-0.0263902	(1)	0.0695317	(1)	-0.0357446	(1)	0.095922	(1)	-0.00935435	(1)	-0.105276	(1)	-0.111519	(1)	-0.145646	(1)	-0.113823	(1)	-0.0341264	(1)	-0.00230403	(1)	0.0318223	(1)
LOC100579031	vascular endothelial growth factor A-A-like	5.03518	3.04604	7.28816	6.05571	3.4794	3.85948	4.86844	3.65536	1.00859	8.81117	4.76506	1.04488	9.49127	8.53692	4.97808	4.46127	6.67193	3.66944	4.26193	4.99884	2.94968	9.14944	4.97887	0.723531	(1)	-0.139015	(1)	0.0769246	(1)	-0.862546	(1)	-0.646607	(1)	0.21594	(1)	-0.757166	(1)	0.876495	(1)	0.0199017	(1)	1.63366	(1)	0.777067	(1)	-0.856593	(1)
LOC411506	dyslexia susceptibility 1 candidate gene 1	1.00704	0	0	1.7302	3.4794	3.85948	0	0.913841	3.02578	0.881117	1.58835	0	2.37282	1.89709	3.73356	0.535182	0.865114	3.66944	0.456926	1.95345	0.794176	2.13496	3.73357	0.780825	(1)	2.86544	(1)	-0.140101	(1)	2.08462	(1)	-0.920925	(1)	-3.00554	(1)	-1.29849	(1)	0.128184	(1)	0.93453	(1)	1.42668	(1)	2.23302	(1)	0.806346	(1)
Spn (LOC551498)	hypothetical protein LOC551498	747.221	1005.19	703.307	1023.41	1027.29	733.3	851.004	932.118	812.925	755.117	698.875	929.944	819.808	665.88	685.731	876.269	863.369	88.296	891.568	784.212	814.492	742.844	685.736	-0.0213078	(1)	0.00671718	(1)	0.0250617	(1)	0.028025	(1)	0.0463695	(1)	0.0183445	(1)	0.0548612	(1)	-0.0778334	(1)	-0.193251	(1)	-0.132695	(1)	-0.248112	(1)	-0.115417	(1)
LOC411754	YTH domain-containing protein 1-like	530.708	515.542	475.552	515.6	521.909	509.451	526.765	496.216	486.141	554.223	552.746	457.658	498.292	509.37	526.432	523.126	495.576	515.688	511.496	52.182	55.2249	53.8359	526.432	-0.0780489	(1)	-0.0206797	(1)	-0.0324483	(1)	0.0573693	(1)	0.0456006	(1)	-0.0117687	(1)	-0.0421559	(1)	-0.0460777	(1)	0.0172309	(1)	-0.00392176	(1)	0.0593868	(1)	0.0633086	(1)
LOC100576099	carbohydrate sulfotransferase 11-like	0	0	1.82204	0	2.60955	0	1.94738	2.74152	0	0	0	0	0	0.948547	0		0.911197	1.34773	2.34446			0.474273								0.518245	(1)	1.3637	(1)	0.84545	(1)
Uba2 (LOC409191)	SUMO-activating enzyme subunit 2	670.686	656.421	612.205	617.682	631.51	620.411	611.476	593.997	515.391	506.642	484.447	471.241	467.445	521.701	471.673	663.554	614.944	625.965	62.7365	511.165	477.844	494.573	471.673	-0.109759	(1)	-0.0841417	(1)	-0.138686	(1)	0.0256174	(1)	-0.0289268	(1)	-0.0545442	(1)	-0.0968293	(1)	-0.0471866	(1)	-0.115582	(1)	0.0496427	(1)	-0.0187528	(1)	-0.0683955	(1)
LOC724457	hypothetical protein LOC724457	15.1055	12.1842	10.0212	15.5718	16.5271	17.3676	11.6843	25.5876	9.07733	14.0979	9.53011	14.6283	21.3554	19.9195	16.1788	13.6449	12.7965	16.9474	18.636	11.5876	12.7922	2.63742	16.1788	-0.0926053	(1)	0.312706	(1)	0.449728	(1)	0.405311	(1)	0.542334	(1)	0.137022	(1)	0.0599454	(1)	0.832681	(1)	0.481519	(1)	0.772735	(1)	0.421574	(1)	-0.351161	(1)
LOC410223	phosducin-like protein-like isoform 1	407.85	463.759	467.353	452.448	428.835	476.645	449.844	455.093	492.193	492.544	587.69	608.12	557.612	514.112	543.855	435.846	459.947	452.744	452.468	492.369	597.953	535.862	543.855	0.0776404	(1)	0.0550028	(1)	0.0541359	(1)	-0.0226377	(1)	-0.0235045	(1)	-0.000866814	(1)	0.280178	(1)	0.122123	(1)	0.143484	(1)	-0.158055	(1)	-0.136694	(1)	0.0213609	(1)
LOC408299	purine nucleoside phosphorylase-like	3.02111	19.7992	17.3094	17.302	8.69849	25.0866	7.78951	47.5197	3.02578	4.40558	6.35341	0	157.792	7.58838	34.8466	11.4118	17.357	16.8925	27.6546	3.71568	3.17674	82.6934	34.8466	0.600926	(1)	0.566065	(1)	1.2772	(1)	-0.0348607	(1)	0.676274	(1)	0.711134	(1)	-0.226096	(1)	4.47602	(1)	3.22932	(1)	4.70212	(1)	3.45541	(1)	-1.2467	(1)
Syn1 (LOC724333)	beta-1-syntrophin	231.618	182.762	168.539	163.504	187.887	171.747	149.948	129.765	179.529	152.433	100.066	157.777	150.674	142.282	136.897	27.1934	166.214	179.817	139.857	165.981	128.922	146.478	136.897	-0.319588	(1)	-0.204427	(1)	-0.567007	(1)	0.115161	(1)	-0.247419	(1)	-0.36258	(1)	-0.364527	(1)	-0.180337	(1)	-0.277928	(1)	0.18419	(1)	0.0865996	(1)	-0.0975903	(1)
LOC100578447		6.04222	12.9457	6.37714	9.51611	7.82864	16.4028	5.84213	10.0523	7.06015	9.69229	1.58835	14.6283	11.8641	2.84564	7.46712	9.49395	7.94662	12.1158	7.94719	8.37622	8.18339	7.35486	7.46712	-0.256665	(1)	0.3518	(1)	-0.256562	(1)	0.608464	(1)	0.000102868	(1)	-0.608362	(1)	-0.0468922	(1)	-0.1876	(1)	-0.165746	(1)	-0.140708	(1)	-0.118854	(1)	0.0218538	(1)
Myo20 (LOC551706)	myosin-IXb isoform 1	394.758	367.809	517.459	357.287	339.241	246.042	658.213	267.755	1001.53	474.041	717.935	134.79	793.707	228.6	271.305	381.284	437.373	292.641	462.984	737.786	426.362	511.153	271.355	0.197999	(1)	-0.381731	(1)	0.280099	(1)	-0.579731	(1)	0.0820996	(1)	0.66183	(1)	-0.791123	(1)	-0.529447	(1)	-1.44329	(1)	0.261677	(1)	-0.652162	(1)	-0.913839	(1)
LOC100578500		8.05629	4.56906	2.73306	0.865101	4.34924	2.89461	3.89475	5.48305	10.0859	1.76223	14.2952	2.08976	13.0505	2.84564	4.97808	6.31267	1.79986	3.62193	4.68892	5.92478	8.19246	7.94866	4.97887	-1.81099	(1)	-0.801494	(1)	-0.429002	(1)	1.0095	(1)	1.38199	(1)	0.372493	(1)	0.467707	(1)	0.424013	(1)	-0.251001	(1)	-0.0436936	(1)	-0.718708	(1)	-0.675014	(1)
LOC724241	LSM domain-containing protein 1-A-like	202.414	191.139	174.005	179.941	185.278	170.782	188.896	165.405	194.658	240.545	273.197	204.797	249.146	241.879	190.412	196.777	176.973	178.298	177.154	217.616	238.997	245.513	19.4116	-0.15303	(1)	-0.14444	(1)	-0.151584	(1)	0.00859048	(1)	0.00144631	(1)	-0.00714417	(1)	0.135301	(1)	0.174108	(1)	-0.192568	(1)	0.0388073	(1)	-0.327868	(1)	-0.366676	(1)
LOC100576140	hypothetical protein LOC100576140	124.873	160.679	174.916	183.401	167.011	165.957	159.685	171.802	173.478	199.132	166.777	215.245	176.775	221.96	199.123	142.776	179.159	166.484	165.744	186.351	191.112	199.367	199.123	0.327489	(1)	0.221637	(1)	0.215204	(1)	-0.105852	(1)	-0.112285	(1)	-0.00643309	(1)	0.0359895	(1)	0.0977621	(1)	0.0959941	(1)	0.0617727	(1)	0.0600046	(1)	-0.00176805	(1)
LOC551763	hypoxia up-regulated protein 1-like	1655.57	1648.67	1587.91	1659.26	1784.93	1678.87	1785.74	1613.84	1478.6	1597.46	1412.04	1742.86	1492.5	1477.84	1495.91	1652.12	1623.59	1732	1699.79	1538.35	1577.45	1485.17	1495.91	-0.0251334	(1)	0.0680396	(1)	0.0410431	(1)	0.093173	(1)	0.0661765	(1)	-0.0269966	(1)	0.0365126	(1)	-0.0504571	(1)	-0.0400576	(1)	-0.0869698	(1)	-0.0765702	(1)	0.0103995	(1)
LOC551794	transmembrane protein 50A-like	691.834	630.53	670.51	583.943	632.38	669.619	588.108	622.326	678.783	673.173	732.23	696.935	622.864	724.69	699.42	661.182	627.227	65.9996	65.2168	675.978	714.583	673.777	699.423	-0.0760601	(1)	-0.0223907	(1)	-0.127595	(1)	0.0536694	(1)	-0.0515353	(1)	-0.105205	(1)	0.0801249	(1)	-0.00470471	(1)	0.0491836	(1)	-0.0848297	(1)	-0.0309413	(1)	0.0538884	(1)
Zfrp8 (LOC724151)	programmed cell death protein 2	123.865	131.741	151.229	138.416	157.443	162.098	115.869	190.079	168.435	169.174	187.426	192.258	198.13	169.79	168.01	127.833	144.823	159.773	152.974	168.847	189.842	183.964	168.123	0.180363	(1)	0.322074	(1)	0.259361	(1)	0.141711	(1)	0.0789979	(1)	-0.0627136	(1)	0.169443	(1)	0.124038	(1)	-0.00680576	(1)	-0.045405	(1)	-0.176248	(1)	-0.130843	(1)
LOC551844	stromal cell-derived factor 2-like protein	1734.12	1591.56	1599.75	1574.48	1747.53	1768.6	1607.56	1559.93	1282.93	1434.46	2018.8	1422.08	1363.18	1471.2	1624.1	1662.84	1587.12	1758.66	1583.74	1358.69	172.439	1417.19	1624.99	-0.0672371	(1)	0.0803431	(1)	-0.0703074	(1)	0.14758	(1)	-0.00307032	(1)	-0.150651	(1)	0.340556	(1)	0.0608126	(1)	0.257419	(1)	-0.279744	(1)	-0.0831371	(1)	0.196607	(1)
LOC725537	hypothetical protein LOC725537	71.4996	92.1427	92.013	67.4779	116.56	115.784	65.2371	77.6765	33.2835	27.3146	36.5321	18.8078	32.033	35.0962	34.8466	81.8211	79.7454	116.172	71.4569	3.29983	27.67	33.5646	34.8466	-0.0370714	(1)	0.505717	(1)	-0.195402	(1)	0.542789	(1)	-0.15833	(1)	-0.701119	(1)	-0.130953	(1)	0.147668	(1)	0.201742	(1)	0.278621	(1)	0.332695	(1)	0.0540747	(1)
LOC725578	hypothetical protein LOC725578	855.981	743.995	821.74	884.133	835.925	851.979	757.53	782.248	644.49	555.104	565.453	657.23	888.62	759.786	718.088	799.988	852.937	843.952	769.889	599.797	611.342	824.23	718.881	0.0924601	(1)	0.0771828	(1)	-0.0553282	(1)	-0.0152773	(1)	-0.147788	(1)	-0.132511	(1)	0.0275042	(1)	0.458525	(1)	0.259687	(1)	0.431021	(1)	0.232182	(1)	-0.198839	(1)
LOC552639	acylphosphatase-1-like	155.084	159.156	177.649	153.988	135.696	187.185	164.553	127.938	153.306	189.44	176.307	155.687	252.705	189.709	189.167	157.12	165.818	161.446	146.246	171.374	165.997	221.272	189.168	0.0777414	(1)	0.0391398	(1)	-0.10347	(1)	-0.0386016	(1)	-0.181212	(1)	-0.14261	(1)	-0.0459822	(1)	0.368258	(1)	0.142521	(1)	0.41424	(1)	0.188503	(1)	-0.225737	(1)
LOC725654	cell growth regulator with RING finger domain	1793.53	1490.27	1531.42	1603.9	1503.97	1562.12	1511.16	1366.19	1145.76	1320.79	744.937	1156.68	1485.38	1238.8	1154.91	1641.94	1567.67	1533.46	1438.68	1233.28	95.8984	1362.93	1154.91	-0.0667556	(1)	-0.0989682	(1)	-0.190625	(1)	-0.0322125	(1)	-0.123869	(1)	-0.0916567	(1)	-0.375269	(1)	0.143328	(1)	-0.0947111	(1)	0.518596	(0.845)	0.280558	(1)	-0.238039	(1)
Spec2 (LOC725686)	CDC42 small effector protein homolog	227.59	211.7	194.958	219.736	215.723	268.234	247.317	238.513	191.633	211.468	222.369	214.2	177.961	214.372	196.634	219.645	27.3469	241.979	242.915	21.5528	218.285	196.166	196.634	-0.0831266	(1)	0.139703	(1)	0.145276	(1)	0.222829	(1)	0.228403	(1)	0.00557354	(1)	0.115072	(1)	-0.0390617	(1)	-0.0356256	(1)	-0.154134	(1)	-0.150698	(1)	0.00343605	(1)
LOC100577844	hypothetical protein LOC100577844	41.2885	47.9751	42.8179	40.6597	40.013	38.5948	24.3422	32.8983	31.2664	29.0769	39.7088	39.7055	55.7612	28.4564	37.3356	44.6318	41.7388	39.3394	28.6224	3.17167	39.7713	42.188	37.3357	-0.0966816	(1)	-0.183399	(1)	-0.641036	(1)	-0.0867178	(1)	-0.544354	(1)	-0.457637	(1)	0.396206	(1)	0.48093	(1)	0.307361	(1)	0.0847238	(1)	-0.0888459	(1)	-0.17357	(1)
LOC725749	hypothetical protein LOC725749	95.6685	92.1427	111.144	95.1611	96.5532	115.784	136.316	97.781	142.212	151.552	136.598	145.238	175.588	194.452	163.032	93.9556	13.1528	16.1688	117.487	146.882	14.9183	185.227	163.321	0.1355	(1)	0.177077	(1)	0.317826	(1)	0.0415768	(1)	0.182326	(1)	0.14075	(1)	-0.0597964	(1)	0.333028	(1)	0.150501	(1)	0.392824	(1)	0.210297	(1)	-0.182527	(1)
LOC100578641	hypothetical protein LOC100578641	33.2322	52.5442	30.0637	40.6597	37.4035	48.2435	39.9212	35.6398	49.421	78.4194	50.8273	67.9172	107.963	98.6489	56.0034	42.8882	35.3617	42.8235	37.7851	63.923	59.3722	13.3618	56.3484	-0.278393	(1)	-0.00217827	(1)	-0.182938	(1)	0.276214	(1)	0.0954547	(1)	-0.18076	(1)	-0.106483	(1)	0.69258	(1)	-0.190758	(1)	0.799064	(1)	-0.084274	(1)	-0.883338	(1)
LOC100577949	potassium/sodium hyperpolarization-activated	48.3377	38.0755	38.2628	31.1436	38.2733	25.0866	50.6318	45.6921	67.5757	81.0628	50.8273	83.5904	103.218	76.8323	58.4924	43.2661	34.7323	31.68	48.1619	74.3192	67.2885	9.24912	58.4924	-0.316182	(1)	-0.447681	(1)	0.156641	(1)	-0.131499	(1)	0.472823	(1)	0.604322	(1)	-0.145084	(1)	0.276589	(1)	-0.345485	(1)	0.421673	(1)	-0.200401	(1)	-0.622074	(1)
LOC725886	f-box/LRR-repeat protein 2-like	260.822	289.374	280.594	297.595	300.098	264.374	347.607	321.672	260.217	299.58	230.311	290.477	247.959	247.571	289.973	275.984	289.944	282.236	334.639	279.898	26.3939	247.765	289.973	0.0715948	(1)	0.0369561	(1)	0.282661	(1)	-0.0346388	(1)	0.211067	(1)	0.245705	(1)	-0.104207	(1)	-0.17593	(1)	0.0510171	(1)	-0.071723	(1)	0.155224	(1)	0.226947	(1)
Hsf (LOC411854)	hypothetical protein LOC411854	2377.61	2948.57	2252.04	2715.55	2856.58	2598.39	2408.91	2509.41	2538.63	2648.64	2160.16	2876.56	2884.16	2543.05	2505.22	2663.9	2483.8	2727.49	2459.16	2593.63	2518.36	2713.66	255.219	-0.100554	(1)	0.0344721	(1)	-0.114937	(1)	0.135026	(1)	-0.0143835	(1)	-0.149409	(1)	-0.0424908	(1)	0.0652377	(1)	-0.050037	(1)	0.107729	(1)	-0.00754613	(1)	-0.115275	(1)
LOC725949	protein pigeon-like	437.054	512.496	558.455	535.498	526.259	501.732	527.739	487.077	530.519	700.488	624.222	709.474	740.319	702.873	738	474.775	546.976	513.995	57.4829	615.537	666.849	721.596	738.474	0.204235	(1)	0.114511	(1)	0.0959032	(1)	-0.0897234	(1)	-0.108331	(1)	-0.0186081	(1)	0.115591	(1)	0.229424	(1)	0.261854	(1)	0.113833	(1)	0.146264	(1)	0.0324303	(1)
LOC552722	glyoxalase domain-containing protein 4-like	3265.82	3291.24	3388.08	3112.63	3088.83	3019.08	3478.99	3321.81	2835.15	3679.54	3862.87	3808.59	3081.1	3143.48	2958.22	3278.53	325.358	353.954	34.4521	3257.35	3835.74	3112.29	2958.22	-0.0124513	(1)	-0.102371	(1)	0.0526548	(1)	-0.0899201	(1)	0.0651061	(1)	0.155026	(1)	0.235803	(1)	-0.0657199	(1)	-0.138966	(1)	-0.301523	(1)	-0.37477	(1)	-0.0732466	(1)
LOC552728	hypothetical protein LOC552728	18.1267	24.3683	43.7289	51.041	33.9241	89.7328	25.3159	64.8827	28.2406	16.7412	23.8253	27.1669	148.301	32.2506	51.0253	21.2475	47.385	61.8285	45.9939	22.4992	25.4968	9.27582	51.2533	1.15714	(1)	1.54098	(1)	1.08581	(1)	0.383842	(1)	-0.0713237	(1)	-0.455166	(1)	0.180934	(1)	2.005	(1)	1.18187	(1)	1.82406	(1)	1.00094	(1)	-0.823126	(1)
LOC552734	hypothetical protein LOC552734	404.829	357.91	366.23	337.389	379.254	373.404	374.87	300.654	599.104	572.726	438.385	404.369	571.849	587.151	541.366	381.37	351.897	376.329	337.762	585.915	421.377	579.5	541.366	-0.116393	(1)	-0.0191926	(1)	-0.175181	(1)	0.0972002	(1)	-0.0587886	(1)	-0.155989	(1)	-0.47558	(0.878)	-0.0158832	(1)	-0.114086	(1)	0.459697	(0.896)	0.361494	(1)	-0.0982028	(1)
pnt (LOC412916)	hypothetical protein LOC412916	1123.85	1024.99	941.083	1103.87	958.573	898.293	1050.61	908.358	1195.18	1088.18	1129.32	1151.46	1068.95	1001.67	1321.68	174.422	122.476	928.433	979.484	1141.69	114.388	135.397	1321.68	-0.071494	(1)	-0.210691	(1)	-0.133467	(1)	-0.139197	(1)	-0.0619735	(1)	0.0772236	(1)	-0.00163398	(1)	-0.141097	(1)	0.211214	(1)	-0.139463	(1)	0.212848	(1)	0.352311	(1)
ATPsyn-Cf6 (LOC726120)	ATP synthase-coupling factor 6, mitochondrial	1499.48	1418.69	1629.81	1464.62	1457.87	1575.63	1495.59	1527.03	1650.06	1816.86	2328.52	1776.3	1952.83	1827.85	1702.5	1459.85	1547.22	1516.75	1511.37	1733.46	252.413	189.339	172.536	0.0846101	(1)	0.0559185	(1)	0.0507329	(1)	-0.0286916	(1)	-0.0338771	(1)	-0.00518558	(1)	0.243665	(1)	0.124991	(1)	-0.0259966	(1)	-0.118674	(1)	-0.269661	(1)	-0.150987	(1)
DNApol-epsilon (LOC409673)	DNA polymerase epsilon catalytic subunit A	91.6403	140.879	108.411	138.416	142.655	124.468	125.606	116.972	112.962	107.496	93.7128	119.116	111.522	143.231	113.251	116.26	123.414	133.562	121.289	11.2293	16.4146	127.376	113.251	0.0861509	(1)	0.200154	(1)	0.0610932	(1)	0.114003	(1)	-0.0250577	(1)	-0.13906	(1)	-0.050812	(1)	0.208591	(1)	0.0390204	(1)	0.259403	(1)	0.0898324	(1)	-0.169571	(1)
Pnn (LOC409672)	pinin	856.988	794.255	808.074	776.861	768.077	906.012	818.872	826.112	816.96	837.942	725.877	759.628	695.235	710.462	766.624	825.621	792.468	837.443	822.492	827.459	742.752	72.8485	766.624	-0.0591282	(1)	0.0198238	(1)	-0.00547821	(1)	0.078952	(1)	0.05365	(1)	-0.025302	(1)	-0.155792	(1)	-0.23546	(1)	-0.110154	(1)	-0.0796678	(1)	0.0456385	(1)	0.125306	(1)
Pax-1 (LOC726200)	paired box protein Pax-1	0	0	2.73306	1.7302	1.7397	0.964869	0	0	0	0	0	0	8.30486	0.948547	1.24452		2.23164	1.35228				4.62673	1.24452							-0.722701	(1)															-1.89439	(1)
Pbp49 (LOC726244)	snRNA-activating protein complex subunit 3	140.985	126.411	127.543	127.17	140.916	134.117	173.317	159.922	161.375	159.482	228.723	155.687	194.571	184.967	212.813	133.698	127.356	137.516	166.619	16.4285	192.249	189.769	212.813	-0.0701058	(1)	0.0406249	(1)	0.31758	(1)	0.110731	(1)	0.387686	(1)	0.276955	(1)	0.260715	(1)	0.242313	(1)	0.407656	(1)	-0.0184025	(1)	0.146941	(1)	0.165343	(1)
LOC100577493	transmembrane and TPR repeat-containing protein	166.161	147.733	179.471	154.853	158.312	137.976	186.948	161.75	170.452	188.559	260.49	193.303	242.027	202.989	192.901	156.947	167.162	148.144	174.349	179.555	226.896	222.582	192.963	0.0909699	(1)	-0.083273	(1)	0.151701	(1)	-0.174243	(1)	0.0607315	(1)	0.234974	(1)	0.338005	(1)	0.30983	(1)	0.103829	(1)	-0.0281748	(1)	-0.234175	(1)	-0.206	(1)
LOC412914	hypothetical protein LOC412914	2167.14	2630.25	1896.74	2646.34	2314.67	1876.67	2220.98	2468.28	1959.69	1596.58	1729.72	1610.16	1579.11	1328.91	1768.46	2398.7	2271.54	295.669	2344.63	1778.14	1669.94	1454.12	1768.46	-0.0785787	(1)	-0.194841	(1)	-0.032889	(1)	-0.116262	(1)	0.0456898	(1)	0.161952	(1)	-0.0905737	(1)	-0.290329	(1)	-0.00787209	(1)	-0.199756	(1)	0.0827017	(1)	0.282457	(1)
LOC100577528	hypothetical protein LOC100577528	70.4925	94.4272	79.2587	111.598	85.2452	75.2598	94.4478	99.6087	81.696	75.7761	193.779	64.7826	106.777	67.3468	125.697	82.4599	95.4284	8.25249	97.2823	78.7369	129.288	87.6179	125.697	0.210726	(1)	-0.0391461	(1)	0.234712	(1)	-0.249872	(1)	0.0239862	(1)	0.273858	(1)	0.715412	(1)	0.145016	(1)	0.674849	(1)	-0.570396	(1)	-0.0405627	(1)	0.529833	(1)
LOC409671	beta-catenin-like protein 1-like	693.848	753.895	731.549	654.881	668.044	759.352	701.056	676.242	644.49	705.775	779.881	641.557	645.406	724.69	677.019	723.871	693.215	713.698	688.649	675.133	71.7187	685.48	677.19	-0.06243	(1)	-0.0204197	(1)	-0.0719643	(1)	0.0420104	(1)	-0.00953428	(1)	-0.0515447	(1)	0.0741079	(1)	0.0210343	(1)	0.00402558	(1)	-0.0530736	(1)	-0.0700824	(1)	-0.0170088	(1)
membrin (LOC412913)	Golgi SNAP receptor complex member 2	233.632	263.482	257.819	237.038	222.681	249.901	240.501	266.842	268.286	286.363	347.849	327.048	295.416	262.747	289.973	248.557	247.428	236.291	253.671	277.324	337.448	279.816	289.973	-0.00656946	(1)	-0.0730131	(1)	0.0293814	(1)	-0.0664437	(1)	0.0359509	(1)	0.102395	(1)	0.283093	(1)	0.00911313	(1)	0.0643458	(1)	-0.27398	(1)	-0.218747	(1)	0.0552327	(1)
LOC726345	uncharacterized protein C1orf31 homolog	49.3448	39.5985	38.2628	38.0644	31.3146	50.1732	29.2107	34.726	47.4038	38.7691	61.9457	39.7055	48.6427	41.7361	37.3356	44.4716	38.1636	4.74387	31.9684	43.8649	5.8256	45.1894	37.3357	-0.220687	(1)	-0.126303	(1)	-0.476243	(1)	0.0943845	(1)	-0.255556	(1)	-0.349941	(1)	0.23832	(1)	0.068749	(1)	-0.206683	(1)	-0.169571	(1)	-0.445003	(1)	-0.275432	(1)
LOC100577602	hypothetical protein LOC100577602	50.3518	60.9208	53.7502	72.6685	83.5055	65.6111	64.2634	65.7966	75.6444	77.5383	69.8875	79.4109	69.9981	64.5012	78.4048	55.6363	63.2932	74.5583	65.3	76.5913	74.6492	67.2496	78.4477	0.184111	(1)	0.422342	(1)	0.225079	(1)	0.238231	(1)	0.040968	(1)	-0.197263	(1)	-0.0370547	(1)	-0.187655	(1)	0.03376	(1)	-0.1506	(1)	0.0708147	(1)	0.221415	(1)
CoRest (LOC409119)	REST corepressor 3 (>1 isoforms)	306.139	351.056	294.259	333.064	295.749	330.95	358.317	306.137	288.457	268.741	238.253	258.085	240.841	280.77	294.951	328.598	313.662	313.349	332.227	278.6	248.169	26.8539	294.951	-0.0671124	(1)	-0.0685495	(1)	0.015848	(1)	-0.00143709	(1)	0.0829605	(1)	0.0843976	(1)	-0.166866	(1)	-0.0952164	(1)	0.0822866	(1)	0.07165	(1)	0.249153	(1)	0.177503	(1)
LOC411591	meiotically up-regulated gene 71 protein-like	484.385	469.09	494.684	547.609	501.903	469.891	506.318	479.767	549.683	533.957	454.269	600.806	571.849	541.62	557.545	476.737	521.146	485.897	493.423	541.82	527.537	556.735	557.545	0.128494	(1)	0.0274563	(1)	0.0485171	(1)	-0.101038	(1)	-0.0799772	(1)	0.0210608	(1)	-0.0385396	(1)	0.0391765	(1)	0.0412753	(1)	0.0777161	(1)	0.0798149	(1)	0.00209874	(1)
LOC725681	hypothetical protein LOC725681	1192.33	1258.01	1187.06	1274.29	1282.16	1263.01	1109.03	1133.16	1147.78	1223.87	1181.73	1284.16	1193.53	1142.05	1153.67	1225.17	123.676	1272.59	1121.97	1185.82	1232.95	1167.79	1153.67	0.0064664	(1)	0.0547776	(1)	-0.128074	(1)	0.0483112	(1)	-0.13454	(1)	-0.182851	(1)	0.0562189	(1)	-0.0221115	(1)	-0.0396598	(1)	-0.0783304	(1)	-0.0958787	(1)	-0.0175483	(1)
LOC724119	ESF1 homolog	310.167	329.734	356.209	340.85	329.673	351.212	324.238	370.106	358.05	338.349	338.319	345.855	320.33	340.528	333.531	319.954	348.529	34.4425	347.172	348.2	342.872	33.4293	333.531	0.123431	(1)	0.0895628	(1)	0.117802	(1)	-0.0338685	(1)	-0.00562941	(1)	0.0282391	(1)	-0.0255503	(1)	-0.0755728	(1)	-0.0620917	(1)	-0.0500225	(1)	-0.0365415	(1)	0.013481	(1)
LOC724152	hypothetical protein LOC724152	91.6403	104.327	102.034	115.924	92.204	109.995	93.4741	106.006	62.5327	77.5383	57.1807	72.0967	75.9301	66.3983	59.737	97.9836	18.9789	11.9952	99.7398	7.35546	64.6388	71.1643	59.737	0.153437	(1)	0.0451645	(1)	0.0256299	(1)	-0.108272	(1)	-0.127807	(1)	-0.0195346	(1)	-0.115688	(1)	0.0230654	(1)	-0.229462	(1)	0.138753	(1)	-0.113774	(1)	-0.252528	(1)
LOC410220	hypothetical protein LOC410220	317.216	296.227	289.704	221.466	294.879	258.585	299.896	296.085	370.153	297.818	195.367	286.297	332.194	388.904	344.732	36.7219	255.586	276.732	297.993	333.985	24.8323	36.5493	344.733	-0.263127	(1)	-0.148442	(1)	-0.0416657	(1)	0.114685	(1)	0.221462	(1)	0.106777	(1)	-0.471756	(1)	0.110411	(1)	0.0456905	(1)	0.582168	(0.835)	0.517447	(1)	-0.0647209	(1)
LOC100578564		0	0	0	0	0	0	0	0	0	0	0	0	0	0	0
LOC100577799	hypothetical protein LOC100577799	28.197	25.8913	21.8645	16.4369	25.2256	27.9812	23.3685	30.1568	40.3437	24.6713	20.6486	29.2567	28.4738	27.5079	16.1788	27.4417	19.157	26.6349	26.7626	32.5748	24.9526	27.9983	16.1788	-0.497921	(1)	-0.0237067	(1)	-0.0150974	(1)	0.474214	(1)	0.482824	(1)	0.00860924	(1)	-0.381581	(1)	-0.215817	(1)	-1.00667	(1)	0.165763	(1)	-0.62509	(1)	-0.790853	(1)
ken (LOC551360)	transcription factor Ken 1	921.438	881.067	823.562	737.931	640.209	708.214	753.635	678.984	522.451	440.558	378.028	451.388	360.668	423.052	528.921	91.2525	78.7465	674.211	716.394	481.546	414.785	391.863	528.922	-0.207077	(1)	-0.41873	(1)	-0.331348	(1)	-0.211653	(1)	-0.124271	(1)	0.087382	(1)	-0.215454	(1)	-0.297211	(1)	0.135503	(1)	-0.0817576	(1)	0.350956	(1)	0.432714	(1)
LOC551389	apolipoprotein D-like isoform 2	47.3307	38.837	52.8391	36.3342	38.2733	31.8407	42.8423	30.1568	29.2492	29.0769	58.769	25.0771	42.7107	34.1477	43.5582	43.8386	44.5867	35.5714	36.4995	29.1632	41.9238	38.4292	43.5583	0.049466	(1)	-0.297444	(1)	-0.23927	(1)	-0.34691	(1)	-0.288736	(1)	0.0581745	(1)	0.523605	(1)	0.398063	(1)	0.578805	(1)	-0.125542	(1)	0.0552	(1)	0.180742	(1)
LOC100578744	apolipoprotein D-like	1.00704	0.76151	0.91102	0.865101	0	1.92974	1.94738	1.82768	0	0.881117	3.1767	1.04488	0	0.948547	2.48904	0.884273	0.888637	0.964869	1.88753	0.445584	2.11792	0.474273	2.48944	0.00616588	(1)	0.125841	(1)	1.09394	(1)	0.119675	(1)	1.08777	(1)	0.968094	(1)	2.26038	(1)	0.106386	(1)	2.49818	(1)	-2.15399	(1)	0.237805	(1)	2.3918	(1)
Dnt (LOC410190)	tyrosine-protein kinase Dnt	176.231	183.524	213.179	180.806	165.271	153.414	229.79	233.029	419.574	338.349	176.307	284.207	304.907	332.94	355.933	179.878	196.992	159.343	231.5	378.962	23.2573	318.923	355.933	0.131124	(1)	-0.174882	(1)	0.363436	(1)	-0.306007	(1)	0.232311	(1)	0.538318	(1)	-0.718805	(0.588)	-0.248842	(1)	-0.090447	(1)	0.469963	(1)	0.628358	(1)	0.158395	(1)
LOC100578612		52.3659	23.6068	52.8391	48.4457	50.4512	29.9109	37.9738	43.8644	96.8249	59.9159	120.715	54.3338	88.9806	124.26	75.9157	37.9863	5.64242	4.18187	4.91911	78.374	87.5243	16.6213	75.9157	0.414865	(1)	0.0810356	(1)	0.107294	(1)	-0.333829	(1)	-0.307571	(1)	0.0262582	(1)	0.159374	(1)	0.444099	(1)	-0.04591	(1)	0.284725	(1)	-0.205284	(1)	-0.490009	(1)
LOC408280	hypothetical protein LOC408280	1708.94	1754.52	1923.16	1386.76	1755.35	1125.04	2027.22	1230.03	2855.32	2901.52	4680.87	2098.12	4279.37	3374.93	3004.27	1731.73	1654.96	144.196	1628.62	2878.42	3389.5	3827.15	34.2717	-0.0654174	(1)	-0.265948	(1)	-0.0885594	(1)	-0.200531	(1)	-0.023142	(1)	0.177389	(1)	0.235793	(1)	0.410994	(1)	0.0617376	(1)	0.1752	(1)	-0.174056	(1)	-0.349256	(1)
LOC726611	hypothetical protein LOC726611	109.767	71.5819	142.119	101.217	95.6834	134.117	80.8161	223.891	286.44	119.832	85.771	153.597	168.47	138.488	143.12	9.67444	121.668	114.984	152.354	23.1364	119.684	153.479	143.12	0.424181	(1)	0.341612	(1)	0.748656	(1)	-0.0825693	(1)	0.324474	(1)	0.407044	(1)	-0.763213	(1)	-0.404406	(1)	-0.505223	(1)	0.358808	(1)	0.257991	(1)	-0.100817	(1)
LOC100578448	hypothetical protein LOC100578448	31.2181	15.9917	32.7967	14.7067	40.013	23.1569	23.3685	27.4152	18.1547	32.6013	33.3554	33.4362	36.7787	34.1477	18.6678	23.6492	23.7517	31.585	25.3919	25.378	33.3958	35.4632	18.6678	0.00894427	(1)	0.42015	(1)	0.10528	(1)	0.411206	(1)	0.0963355	(1)	-0.31487	(1)	0.396088	(1)	0.482744	(1)	-0.443026	(1)	0.0866557	(1)	-0.839114	(1)	-0.92577	(1)
LOC551496	hypothetical protein LOC551496	516.61	719.627	686.909	411.788	504.512	518.135	575.45	1286.69	1181.06	974.515	2198.28	1464.92	2311.12	1070.91	1677.61	618.118	549.348	511.324	931.696	177.788	1831.67	1691.16	1677.61	-0.170161	(1)	-0.273646	(1)	0.591006	(1)	-0.103485	(1)	0.761167	(1)	0.864652	(1)	0.765031	(1)	0.649817	(1)	0.638336	(1)	-0.115214	(1)	-0.126695	(1)	-0.0114806	(1)
LOC409648	hypothetical protein LOC409648	11.0774	9.13812	18.2204	13.8416	19.1367	28.9461	10.7106	42.0367	6.05155	1.76223	3.1767	3.13464	5.93204	4.74273	2.48904	1.17758	16.3153	24.4137	26.3736	3.96893	3.15567	5.33739	2.48944	0.665402	(1)	1.25006	(1)	1.38363	(1)	0.584654	(1)	0.718231	(1)	0.133577	(1)	-0.308074	(1)	0.450112	(1)	-0.650432	(1)	0.758186	(1)	-0.342358	(1)	-1.10054	(1)
LOC726546	gem-associated protein 7-like	441.082	420.353	427.268	431.685	386.213	404.28	400.186	398.435	410.497	372.712	565.453	478.555	454.394	533.083	502.786	43.7176	429.477	395.247	399.313	391.647	522.426	493.739	52.7862	-0.00416208	(1)	-0.12399	(1)	-0.109232	(1)	-0.119828	(1)	-0.10507	(1)	0.0147577	(1)	0.414663	(1)	0.33435	(1)	0.360547	(1)	-0.0803133	(1)	-0.0541167	(1)	0.0261967	(1)
MED30 (LOC412870)	mediator of RNA polymerase II transcription	241.689	242.922	264.196	222.331	227.031	250.866	240.501	249.479	308.629	281.076	297.022	273.759	259.823	303.535	278.773	242.352	243.263	238.948	244.99	294.853	285.392	281.679	278.773	0.00569383	(1)	-0.0201269	(1)	0.0158968	(1)	-0.0258207	(1)	0.0102029	(1)	0.0360237	(1)	-0.0470586	(1)	-0.0659415	(1)	-0.0809063	(1)	-0.0188829	(1)	-0.0338476	(1)	-0.0149648	(1)
LOC100578316	hypothetical protein LOC100578316	11.0774	8.37661	4.5551	3.4604	6.08894	2.89461	10.7106	3.65536	13.1117	18.5035	6.35341	14.6283	22.5418	31.302	37.3356	9.72732	4.77513	4.49177	7.18297	15.8758	1.49867	26.9219	37.3357	-1.2792	(1)	-1.11471	(1)	-0.437415	(1)	0.164493	(1)	0.841787	(1)	0.677295	(1)	-0.591482	(1)	0.768164	(1)	1.23994	(1)	1.35965	(1)	1.83142	(1)	0.471772	(1)
LOC551587	RNA-binding protein 38-like (>1 isoforms)	193.351	176.67	161.25	191.187	226.161	152.449	197.659	179.113	419.574	355.971	308.14	330.182	326.262	301.638	368.378	185.162	176.219	189.354	188.386	387.773	319.161	313.951	368.378	-0.0702393	(1)	0.0331045	(1)	0.0260822	(1)	0.103344	(1)	0.0963215	(1)	-0.00702232	(1)	-0.280926	(1)	-0.304676	(1)	-0.0740247	(1)	-0.0237502	(1)	0.206901	(1)	0.230652	(1)
LOC409649	solute carrier organic anion transporter family	6058.33	5584.15	6086.52	6123.19	4823.31	5515.19	6316.32	5398.97	7120.66	8496.61	6091.33	6015.38	7003.37	6373.29	5774.57	5821.25	614.854	5169.25	5857.64	788.635	653.353	6688.33	5774.57	0.0686301	(1)	-0.171371	(1)	0.00899411	(1)	-0.240001	(1)	-0.059636	(1)	0.180365	(1)	-0.367336	(1)	-0.223425	(1)	-0.435356	(1)	0.143911	(1)	-0.0680201	(1)	-0.211931	(1)
LOC409650	solute carrier organic anion transporter family	28448.8	25398.6	32782.1	28473.1	26245.1	26913.1	28750.1	25662.5	49885	49683.5	32232.4	37304.3	44833.2	45007.6	40573.8	26923.7	3627.62	26579.9	2726.29	49784.3	34768.4	4492.39	4573.85	0.185955	(1)	-0.0185854	(1)	0.0150634	(1)	-0.204541	(1)	-0.170892	(1)	0.0336488	(1)	-0.517914	(0.479)	-0.148319	(1)	-0.295139	(1)	0.369595	(1)	0.222775	(1)	-0.14682	(1)
LOC726470		9310.05	7455.94	6718.77	7553.2	7074.48	7635.01	6217.97	7355.51	6100.97	5960.76	7188.88	7856.46	4650.72	5250.21	6868.51	8383	7135.98	7354.74	6786.75	63.8649	7522.67	495.464	6868.57	-0.232354	(1)	-0.188791	(1)	-0.304747	(1)	0.0435629	(1)	-0.0723935	(1)	-0.115956	(1)	0.31888	(1)	-0.284801	(1)	0.187632	(1)	-0.603681	(0.145)	-0.131248	(1)	0.472433	(1)
LOC100577980	hypothetical protein LOC100577980	1450.13	1889.31	1462.19	1181.73	1955.42	2133.33	1736.09	1210.84	2397.42	1818.63	2611.25	1987.36	1935.03	1910.37	2276.23	1669.72	1321.96	244.373	1473.46	218.244	2299.37	1922.73	2276.23	-0.33693	(1)	0.292053	(1)	-0.180394	(1)	0.628983	(1)	0.156535	(1)	-0.472448	(1)	0.125307	(1)	-0.132756	(1)	0.110753	(1)	-0.258063	(1)	-0.0145541	(1)	0.243509	(1)
LOC100577951		11.0774	6.85359	19.1314	30.2785	10.4382	13.5082	21.4211	35.6398	14.1203	2.64335	27.002	5.2244	16.6097	11.3826	12.4452	8.96549	24.7497	11.9732	28.5347	8.38183	16.1132	13.9961	12.4452	1.46235	(1)	0.417351	(1)	1.67005	(1)	-1.045	(1)	0.207702	(1)	1.2527	(1)	0.942907	(1)	0.739693	(1)	0.570254	(1)	-0.203213	(1)	-0.372653	(1)	-0.169439	(1)
LOC100577981	insulin-like growth factor-binding protein	21566.7	20362.8	18981.1	20292.7	15271.1	16638.2	18005.4	21348.2	18041.7	16155.3	19026.9	15948	14015	16066.5	16949.1	2964.73	19636.9	15954.6	19676.8	1798.49	17487.4	154.765	16949.1	-0.0943981	(1)	-0.393989	(1)	-0.0914654	(1)	-0.299591	(1)	0.00293273	(1)	0.302523	(1)	0.0324503	(1)	-0.184991	(1)	-0.0126583	(1)	-0.217441	(1)	-0.0451086	(1)	0.172333	(1)
LOC726414	hypothetical protein LOC726414	9154.97	7461.27	8488.88	9262.64	6850.06	7397.65	7325.06	7600.42	8827.2	7977.63	6896.62	8510.55	4169.04	5782.34	6119.31	838.12	8875.76	7123.86	7462.74	842.416	773.588	4975.69	6119.36	0.0953485	(1)	-0.221864	(1)	-0.154817	(1)	-0.317212	(1)	-0.250166	(1)	0.0670467	(1)	-0.125274	(1)	-0.755907	(0.050)	-0.457436	(1)	-0.630634	(0.094)	-0.332162	(1)	0.298471	(1)
LOC100577868	hypothetical protein LOC100577868	1.00704	3.80755	1.82204	4.32551	2.60955	3.85948	1.94738	8.22457	1.00859	0.881117	1.58835	5.2244	9.49127	1.89709	3.73356	2.47292	3.73772	3.23451	5.85973	0.944855	3.46377	5.69418	3.73357	0.352599	(1)	0.426136	(1)	1.07911	(1)	0.0735375	(1)	0.726514	(1)	0.652976	(1)	1.85007	(1)	2.59132	(1)	1.98239	(1)	0.74125	(1)	0.132314	(1)	-0.608936	(1)
Gp150 (LOC551793)	glycoprotein 150	79788.5	82830.2	78152.7	77367.7	74619.1	80370.7	73290.5	75539.9	49504.7	54210.7	47974.6	48486.6	41887.3	44478.3	44639.7	8139.33	7776.23	77494.9	74415.2	51857.7	4823.66	43182.8	44639.7	-0.0643885	(1)	-0.0693195	(1)	-0.127823	(1)	-0.00493095	(1)	-0.0634348	(1)	-0.0585038	(1)	-0.10461	(1)	-0.264101	(1)	-0.216232	(1)	-0.159491	(1)	-0.111622	(1)	0.0478696	(1)
LOC100577856	probable hydroxyacid-oxoacid transhydrogenase,	466.258	384.562	458.243	416.979	385.343	419.718	429.397	388.382	357.042	331.3	401.853	298.836	414.057	347.168	352.199	425.412	437.618	42.5353	48.8895	344.178	35.3444	38.6123	352.199	0.040794	(1)	-0.0797561	(1)	-0.0571432	(1)	-0.12055	(1)	-0.0979373	(1)	0.0226129	(1)	0.0256493	(1)	0.145198	(1)	0.033267	(1)	0.119548	(1)	0.00761776	(1)	-0.111931	(1)
T3dh (LOC552069)	probable hydroxyacid-oxoacid transhydrogenase,	190.33	163.725	194.047	159.179	177.449	151.484	186.948	158.095	137.169	151.552	133.422	130.61	153.047	158.407	140.631	177.272	176.613	164.467	172.521	144.363	132.159	155.727	14.6378	-0.00338058	(1)	-0.106175	(1)	-0.0371964	(1)	-0.102794	(1)	-0.0338158	(1)	0.0689784	(1)	-0.128964	(1)	0.109345	(1)	-0.0377618	(1)	0.238308	(1)	0.0912017	(1)	-0.147107	(1)
LOC413924	glyceraldehyde-3-phosphate dehydrogenase 1-like	2.01407	4.56906	3.64408	5.19061	9.56834	2.89461	4.86844	1.82768	2.01718	0.881117	9.53011	5.2244	1.18641	5.69128	2.48904	3.29157	4.41734	6.23147	3.34863	1.44916	7.37726	3.43884	2.48944	0.424405	(1)	0.920799	(1)	0.0245525	(1)	0.496394	(1)	-0.399852	(1)	-0.896247	(1)	2.34788	(1)	1.24672	(1)	0.780382	(1)	-1.10116	(1)	-1.56749	(1)	-0.466334	(1)
Gapdh (LOC410122)	glyceraldehyde-3-phosphate dehydrogenase 2	20079.3	19094.9	18339.7	17194.7	19336.7	19127.6	17386.2	16801.9	17688.7	18070.8	18748.9	19116.1	15705.7	17302.4	19375.9	19587.8	17767.2	19232.2	1794.31	17879.8	18932.5	1654.59	19375.9	-0.140682	(1)	-0.0263819	(1)	-0.196409	(1)	0.1143	(1)	-0.0557272	(1)	-0.170028	(1)	0.0825375	(1)	-0.115506	(1)	0.115939	(1)	-0.198044	(1)	0.0334012	(1)	0.231445	(1)
LOC726273	hypothetical protein LOC726273	708.954	740.949	766.168	737.066	591.497	677.338	806.214	650.655	624.319	605.327	621.046	613.345	538.629	572.922	525.188	724.951	751.617	634.418	728.434	614.823	617.195	555.776	525.188	0.0521134	(1)	-0.192451	(1)	0.00691514	(1)	-0.244564	(1)	-0.0451983	(1)	0.199366	(1)	0.00555589	(1)	-0.145668	(1)	-0.227338	(1)	-0.151224	(1)	-0.232894	(1)	-0.0816705	(1)
Reps (LOC413925)	hypothetical protein LOC413925	1.00704	1.52302	9.1102	4.32551	5.21909	4.82435	4.86844	8.22457	8.06874	6.16782	4.76506	3.13464	15.4233	11.3826	2.48904	1.26528	6.71785	5.21719	6.54656	7.11828	3.94985	13.4294	2.48944	2.40883	(1)	1.98901	(1)	2.37156	(1)	-0.419818	(1)	-0.0372747	(1)	0.382544	(1)	-0.849731	(1)	0.912949	(1)	-1.51594	(1)	1.76268	(1)	-0.666208	(1)	-2.42889	(1)
LOC726321	hypothetical protein LOC726321	521.645	454.621	460.976	511.275	595.846	500.767	695.214	489.819	723.161	556.866	665.519	503.632	817.435	649.755	709.377	488.134	486.125	548.367	592.516	64.1323	584.576	733.595	79.3766	-0.0059461	(1)	0.167709	(1)	0.27958	(1)	0.173655	(1)	0.285526	(1)	0.111871	(1)	-0.130711	(1)	0.196882	(1)	0.14845	(1)	0.327593	(1)	0.279161	(1)	-0.0484322	(1)
LOC100577788		28.197	32.7449	37.3518	35.4691	29.5749	49.2083	29.2107	31.0706	11.0945	14.979	12.7068	27.1669	16.6097	27.5079	17.4233	3.47966	36.4148	39.3916	3.14625	13.3675	19.9369	22.5879	17.4233	0.256918	(1)	0.370452	(1)	-0.0157259	(1)	0.113534	(1)	-0.272644	(1)	-0.386178	(1)	0.612853	(1)	0.758769	(1)	0.418432	(1)	0.145916	(1)	-0.194421	(1)	-0.340337	(1)
LOC726268	hypothetical protein LOC726268 (>1 isoforms)	586.095	669.367	808.985	665.263	474.937	574.097	666.977	1373.5	1511.88	1299.65	883.124	953.976	1418.94	903.965	1015.53	627.732	737.125	524.517	12.2399	145.764	918.55	1161.45	115.528	0.231761	(1)	-0.259156	(1)	0.70069	(1)	-0.490917	(1)	0.468929	(1)	0.959846	(1)	-0.613924	(1)	-0.275421	(1)	-0.469123	(1)	0.338503	(1)	0.144801	(1)	-0.193702	(1)
LOC100577748	hypothetical protein LOC100577748	523.659	423.399	519.281	481.861	503.642	474.716	409.923	460.576	523.459	526.908	486.036	417.952	467.445	443.92	547.589	473.529	5.57125	489.179	435.249	525.184	451.994	455.682	547.589	0.0801222	(1)	0.0469093	(1)	-0.121611	(1)	-0.0332129	(1)	-0.201733	(1)	-0.16852	(1)	-0.216519	(1)	-0.204793	(1)	0.0602712	(1)	0.0117253	(1)	0.27679	(1)	0.265064	(1)
LOC726201	hypothetical protein LOC726201	44.3096	31.9834	40.9959	32.0087	20.0065	43.4191	50.6318	38.3813	58.4983	52.867	65.1224	59.5582	67.6253	59.7585	73.4267	38.1465	36.5231	31.7128	44.5656	55.6827	62.3437	63.6919	73.4267	-0.063563	(1)	-0.266485	(1)	0.222467	(1)	-0.202922	(1)	0.28603	(1)	0.488952	(1)	0.162937	(1)	0.19388	(1)	0.399076	(1)	0.0309439	(1)	0.236139	(1)	0.205195	(1)
LOC100577716		1.00704	0	0	0	0	0	0	1.82768	1.00859	0	0	1.04488	2.37282	0	1.24452	0.535182			0.913841	0.542961	0.522443	1.18648	1.24452					0.859899	(1)							0.0509949	(1)	1.23426	(1)	1.30325	(1)	1.18326	(1)	1.25225	(1)	0.068989	(1)
LOC100577573	hypothetical protein LOC100577573	1.00704	4.56906	0	0	0	2.89461	5.84213	0.913841	2.01718	0.881117	1.58835	3.13464	4.74563	0.948547	7.46712	2.78847		1.44734	3.37799	1.44916	2.3615	2.84791	7.46712			-0.945887	(1)	0.276908	(1)					1.2228	(1)	0.704494	(1)	0.974281	(1)	2.36534	(1)	0.269787	(1)	1.66085	(1)	1.39106	(1)
LOC100577762		3.02111	0.76151	2.73306	0.865101	3.4794	1.92974	2.92107	2.74152	7.06015	7.04893	3.1767	2.08976	4.74563	10.434	2.48904	1.89139	1.79986	2.74567	2.83129	7.54542	2.63323	7.58982	2.48944	-0.072126	(1)	0.516012	(1)	0.582076	(1)	0.588138	(1)	0.654202	(1)	0.0660642	(1)	-1.42172	(1)	0.105515	(1)	-1.50296	(1)	1.52723	(1)	-0.0812452	(1)	-1.60848	(1)
kel (LOC410191)	ring canal kelch homolog	329.301	389.893	284.238	350.366	348.809	291.39	318.396	325.327	347.964	311.915	219.193	255.996	230.163	244.725	250.149	359.597	317.323	32.9992	321.862	329.94	237.594	237.444	25.1486	-0.180524	(1)	-0.167858	(1)	-0.159939	(1)	0.0126655	(1)	0.0205845	(1)	0.00791892	(1)	-0.473704	(1)	-0.474615	(1)	-0.399418	(1)	-0.000910955	(1)	0.0742859	(1)	0.0751969	(1)
LOC100577236		314.195	325.165	300.637	203.299	136.566	253.761	309.633	186.424	231.976	421.174	181.072	225.694	279.992	238.085	185.434	319.68	251.968	195.163	248.282	326.575	23.3831	259.388	185.434	-0.34339	(1)	-0.711946	(1)	-0.366124	(1)	-0.368556	(1)	-0.0227339	(1)	0.345822	(1)	-0.683214	(1)	-0.334246	(1)	-0.816513	(1)	0.348968	(1)	-0.133298	(1)	-0.482266	(1)
LOC100577211		4.02815	6.85359	3.64408	2.5953	2.60955	0.964869	1.94738	0.913841	4.03437	2.64335	6.35341	2.08976	16.6097	5.69128	7.46712	5.44867	3.1197	1.78728	1.43689	3.33886	4.22158	11.155	7.46712	-0.802433	(1)	-1.60613	(1)	-1.92721	(1)	-0.803696	(1)	-1.12477	(1)	-0.321078	(1)	0.338429	(1)	1.73968	(1)	1.1612	(1)	1.40125	(1)	0.822768	(1)	-0.578484	(1)
LOC100577182		16.1126	12.9457	15.4873	14.7067	15.6573	11.5784	24.3422	10.9661	33.2835	27.3146	25.4136	12.5386	29.6602	23.7137	21.1568	14.5291	15.9726	13.6179	17.6542	3.29983	18.977	26.6869	21.1568	0.0553168	(1)	-0.0934483	(1)	0.28106	(1)	-0.148765	(1)	0.225743	(1)	0.374508	(1)	-0.675091	(1)	-0.18314	(1)	-0.51815	(1)	0.491951	(1)	0.156941	(1)	-0.33501	(1)
LOC100577138	dual 3',5'-cyclic-AMP and -GMP phosphodiesterase	2097.66	2655.38	2076.21	2411.04	2569.53	2166.13	2337.83	2287.34	2619.31	2744.68	1888.55	3028.06	2544.85	2046.96	2263.78	2376.52	2243.63	2367.83	2312.59	2682	2458.37	2295.96	2263.78	-0.0830191	(1)	-0.00528394	(1)	-0.0393444	(1)	0.0777352	(1)	0.0436747	(1)	-0.0340604	(1)	-0.125642	(1)	-0.224244	(1)	-0.244572	(1)	-0.0986021	(1)	-0.11893	(1)	-0.0203278	(1)
LOC100577004	probable G-protein coupled receptor	64.4503	67.0128	56.4832	54.5014	73.0673	67.5408	55.5002	48.4336	92.7905	87.2306	58.769	56.4235	92.5399	104.34	102.051	65.7316	55.4923	7.34677	51.967	9.15262	57.5963	98.4449	12.5655	-0.244299	(1)	0.0970213	(1)	-0.338994	(1)	0.341321	(1)	-0.0946942	(1)	-0.436015	(1)	-0.644118	(1)	0.129151	(1)	0.18112	(1)	0.773269	(0.892)	0.825238	(1)	0.0519688	(1)
LOC100576963	myoneurin-like	234.639	217.03	238.687	246.554	302.707	239.288	221.027	208.356	153.306	170.937	106.42	154.642	113.895	146.076	134.408	225.835	242.625	27.9975	214.692	162.121	13.5395	129.986	134.482	0.103433	(1)	0.263011	(1)	-0.073003	(1)	0.159578	(1)	-0.176436	(1)	-0.336014	(1)	-0.312682	(1)	-0.318721	(1)	-0.270453	(1)	-0.00603877	(1)	0.0422291	(1)	0.0482679	(1)
LOC410194	protein downstream neighbor of son homolog	140.985	137.833	146.674	142.742	168.751	132.187	161.632	138.904	145.237	184.153	146.128	179.719	174.402	140.385	148.098	139.492	144.779	15.4689	15.2686	164.695	162.924	157.393	148.979	0.0538184	(1)	0.11014	(1)	0.108213	(1)	0.0563211	(1)	0.0543945	(1)	-0.00192662	(1)	-0.0156015	(1)	-0.065424	(1)	-0.153249	(1)	-0.0498225	(1)	-0.137647	(1)	-0.0878246	(1)
LOC100576858	hypothetical protein LOC100576858	6.04222	7.6151	10.0212	6.05571	7.82864	11.5784	4.86844	11.8799	6.05155	14.0979	14.2952	8.35904	11.8641	15.1768	9.95616	6.82866	8.38462	9.73534	8.37419	1.74712	11.3272	13.5242	9.95616	0.235318	(1)	0.506908	(1)	0.294347	(1)	0.271591	(1)	0.0590299	(1)	-0.212561	(1)	0.169041	(1)	0.424401	(1)	-0.017077	(1)	0.25536	(1)	-0.186118	(1)	-0.441478	(1)
LOC414006	hypothetical protein LOC414006	50.3518	54.8287	72.8816	61.4222	53.9306	60.7867	58.4213	59.3997	59.5069	64.3215	65.1224	49.1094	72.3709	55.9643	64.715	52.5926	67.1519	57.3587	58.9149	61.9142	57.1159	64.1676	64.7155	0.352632	(1)	0.125217	(1)	0.163729	(1)	-0.227416	(1)	-0.188903	(1)	0.0385125	(1)	-0.116379	(1)	0.0515736	(1)	0.0638301	(1)	0.167952	(1)	0.180209	(1)	0.0122565	(1)
LOC726017	lachesin-like	95.6685	135.549	67.4155	64.8826	156.573	154.379	108.079	71.2796	140.194	155.077	114.361	91.9495	156.606	139.436	95.8281	115.686	66.1492	155.476	89.6796	147.635	13.1555	148.211	95.8285	-0.805457	(1)	0.427443	(1)	-0.366398	(1)	1.2329	(0.050)	0.439059	(1)	-0.793841	(1)	-0.51722	(1)	0.0037642	(1)	-0.623519	(1)	0.520984	(1)	-0.106299	(1)	-0.627283	(1)
LOC100576793	hypothetical protein LOC100576793	0	1.52302	1.82204	0.865101	1.7397	0.964869	0	0	1.00859	1.76223	0	1.04488	3.55923	2.84564	0	0.761596	1.34357	1.35228		1.38541	0.522443	3.22433		0.819138	(1)	0.828463	(1)			0.00932577	(1)					-1.40698	(1)	1.20885	(1)			2.61583	(1)
LOC100576772		0	0	0	0.865101	0	0.964869	2.92107	0	1.00859	0	3.1767	1.04488	0	0	0		0.432555	0.482435	1.46533	0.542961	2.11792									0.157464	(1)	1.75555	(1)	1.59809	(1)	2.06544	(1)
LOC100576750		0	0.76151	0	0.865101	0.869849	0	1.94738	0.913841	0	0	0	1.04488	0	0.948547	0	0.387548	0.432555	0.434924	1.43689		0.522443	0.474273		0.184006	(1)	0.191902	(1)	1.9097	(1)	0.00789609	(1)	1.72569	(1)	1.71779	(1)							-0.139547	(1)
LOC100576715	hypothetical protein LOC100576715	0	0	0	0	0	0	0	0	0	0	0	0	1.18641	0	0							0.593242
LOC100576692		0	0	1.82204	0	0	0.964869	0	1.82768	1.00859	2.64335	0	0	1.18641	3.79419	0		0.911197	0.482435	0.913841	1.82597		2.49298								-0.917149	(1)	0.0044611	(1)	0.92161	(1)			0.447654	(1)
msn (LOC413504)	serine/threonine-protein kinase mig-15	1963.72	2251.02	1887.63	2501.87	2285.09	1396.17	2237.54	1989.43	1783.19	1561.34	1658.24	1742.86	1631.31	1234.06	1428.71	217.372	2194.75	184.629	2113.48	1672.27	17.55	1432.69	1428.79	0.0586135	(1)	-0.195246	(1)	0.00417839	(1)	-0.253859	(1)	-0.0544351	(1)	0.199424	(1)	0.0241979	(1)	-0.223082	(1)	-0.227091	(1)	-0.247279	(1)	-0.251289	(1)	-0.00400967	(1)
LOC725950	hypothetical protein LOC725950	1777.42	1998.96	1896.74	1941.29	1758.83	1810.09	1972.69	1793.87	1853.79	1808.93	1893.32	1940.34	1993.17	1934.09	1915.32	1888.19	1919.15	1784.46	1883.28	1831.36	1916.83	1963.63	1915.32	0.0233612	(1)	-0.0815136	(1)	-0.00375614	(1)	-0.104875	(1)	-0.0271173	(1)	0.0777575	(1)	0.0658043	(1)	0.100603	(1)	0.0646653	(1)	0.0347988	(1)	-0.00113895	(1)	-0.0359377	(1)
RpLP1 (LOC406120)	60S acidic ribosomal protein P1	14135.8	12265.6	11907	12503.3	12286.6	13507.2	12586.9	11412	10262.4	10336.4	15530.9	12011.9	12131	12516.1	12569.7	132.728	1225.17	12897	11999.5	1299.44	13771.4	12323.6	12569.7	-0.113123	(1)	-0.0335895	(1)	-0.137645	(1)	0.0795333	(1)	-0.0245226	(1)	-0.104056	(1)	0.419117	(1)	0.258857	(1)	0.287384	(1)	-0.16026	(1)	-0.131733	(1)	0.0285269	(1)
Ndufs6 (LOC412328)	NADH dehydrogenase [ubiquinone] iron-sulfur	607.243	571.894	553.9	548.474	581.929	547.081	512.16	576.634	804.857	772.739	906.949	762.763	812.69	750.301	762.891	589.568	551.187	564.548	544.397	788.798	834.856	781.495	762.899	-0.0971171	(1)	-0.0626732	(1)	-0.115	(1)	0.034444	(1)	-0.017883	(1)	-0.052327	(1)	0.0818711	(1)	-0.013419	(1)	-0.0481793	(1)	-0.0952902	(1)	-0.13005	(1)	-0.0347602	(1)
LOC725977	protein SYS1 homolog	281.97	309.173	351.654	319.222	314.885	322.266	281.396	362.795	335.861	306.629	463.799	482.735	386.769	341.477	405.714	295.572	335.438	318.576	322.954	321.245	473.267	364.123	45.7136	0.182538	(1)	0.108129	(1)	0.123981	(1)	-0.0744093	(1)	-0.0585577	(1)	0.0158517	(1)	0.55898	(0.631)	0.180752	(1)	0.336788	(1)	-0.378228	(1)	-0.222192	(1)	0.156036	(1)
LOC100576472		1410.86	1810.11	1423.01	1585.73	1711.86	1428.01	1530.64	1649.48	1325.29	1277.62	940.304	1323.86	1166.24	1068.06	1047.89	161.483	154.371	1569.93	159.667	131.455	1132.84	1117.15	147.886	-0.0983327	(1)	-0.0367894	(1)	-0.0184118	(1)	0.0615434	(1)	0.079921	(1)	0.0183776	(1)	-0.201144	(1)	-0.2203	(1)	-0.312643	(1)	-0.0191559	(1)	-0.111499	(1)	-0.0923432	(1)
mRpL37 (LOC725854)	39S ribosomal protein L37, mitochondrial	238.668	246.729	283.327	239.633	273.133	282.707	256.08	241.254	221.89	220.279	252.548	240.322	258.637	268.439	241.437	242.698	261.486	277.92	248.667	221.848	246.435	263.538	241.437	0.107536	(1)	0.195503	(1)	0.0350509	(1)	0.0879666	(1)	-0.0724856	(1)	-0.160452	(1)	0.156609	(1)	0.253411	(1)	0.127047	(1)	0.0968019	(1)	-0.0295622	(1)	-0.126364	(1)
LOC552469	cyclin-dependent kinase 20-like isoform 1	44.3096	38.837	39.1738	50.1759	53.0608	48.2435	38.9475	61.2274	38.3265	39.6503	60.3574	47.0196	43.8971	52.1701	51.0253	41.5733	44.6749	5.65212	5.87445	38.9884	53.6885	48.3359	51.2533	0.103806	(1)	0.284965	(1)	0.268792	(1)	0.18116	(1)	0.164986	(1)	-0.0161735	(1)	0.461569	(1)	0.301	(1)	0.388169	(1)	-0.160569	(1)	-0.0733995	(1)	0.0871698	(1)
rec (LOC412034)	DNA replication licensing factor MCM8	58.4081	49.4981	96.5681	80.4544	90.4643	61.7516	94.4478	69.4519	102.876	114.545	101.655	68.9621	126.946	125.208	99.5616	53.9531	88.5112	76.1795	81.9498	18.718	85.3832	126.769	99.5616	0.714154	(1)	0.496341	(1)	0.603035	(1)	-0.217814	(1)	-0.111119	(1)	0.106694	(1)	-0.349737	(1)	0.213809	(1)	-0.126834	(1)	0.563546	(1)	0.222903	(1)	-0.340643	(1)
LOC725726	hypothetical protein LOC725726	1.00704	0	0.91102	0	0	1.92974	0	0	1.00859	1.76223	0	0	0	0.948547	1.24452	0.535182	0.455598	0.964869		1.38541		0.474273	1.24452	-0.144562	(1)	0.938289	(1)			1.08285	(1)							-1.54653	(1)	-0.154726	(1)					1.3918	(1)
LOC100576387	hypothetical protein LOC100576387	1.00704	0	1.82204	0	0.869849	0.964869	0	0	0	0	0	0	1.18641	0.948547	1.24452	0.535182	0.911197	0.917359				1.67478	1.24452	0.855438	(1)	0.865442	(1)			0.0100041	(1)															0.221384	(1)
Inos (LOC551143)	inositol-3-phosphate synthase 1-B isoform 1	462.23	402.839	726.994	407.463	447.102	379.194	431.344	555.615	423.609	446.726	405.03	388.696	971.668	977.952	467.94	432.534	567.228	413.148	493.48	435.167	396.863	974.811	467.94	0.391115	(1)	-0.0661556	(1)	0.190177	(1)	-0.457271	(1)	-0.200938	(1)	0.256332	(1)	-0.132931	(1)	1.16355	(0.012)	0.104752	(1)	1.29648	(0.001)	0.237683	(1)	-1.0588	(0.736)
ATM (LOC725613)	serine-protein kinase ATM	241.689	243.683	224.111	226.656	257.475	248.936	239.527	217.494	289.466	306.629	331.966	315.554	393.888	385.11	314.864	242.686	225.384	253.257	228.518	298.473	323.76	389.499	314.864	-0.106707	(1)	0.0612197	(1)	-0.0868282	(1)	0.167927	(1)	0.0198792	(1)	-0.148048	(1)	0.119382	(1)	0.386078	(1)	0.0791856	(1)	0.266695	(1)	-0.0401965	(1)	-0.306892	(1)
LOC100576322	DNA-directed RNA polymerase, mitochondrial-like	93.6544	89.8581	102.945	98.6215	100.033	119.644	89.5793	116.972	126.074	132.168	146.128	135.834	166.097	120.465	135.653	91.7563	1.78337	19.8382	13.2755	129.128	14.9814	143.281	135.653	0.135379	(1)	0.259501	(1)	0.17062	(1)	0.124122	(1)	0.0352404	(1)	-0.0888817	(1)	0.126784	(1)	0.150129	(1)	0.0711966	(1)	0.0233454	(1)	-0.0555872	(1)	-0.0789327	(1)
LOC725579	DNA-directed RNA polymerase, mitochondrial-like	176.231	181.239	198.602	180.806	191.367	192.974	196.685	187.337	229.959	222.041	184.249	168.226	206.435	213.423	186.678	178.735	189.743	192.173	192.112	226.236	176.237	29.9295	186.678	0.0859268	(1)	0.10456	(1)	0.103366	(1)	0.0186335	(1)	0.0174391	(1)	-0.00119443	(1)	-0.358805	(1)	-0.106422	(1)	-0.275772	(1)	0.252383	(1)	0.0830329	(1)	-0.16935	(1)
LOC413792	hypothetical protein LOC413792	167.168	116.511	211.357	166.964	199.195	190.079	173.317	191.907	146.246	178.867	169.954	113.892	191.012	224.806	141.875	141.84	189.165	194.637	182.612	162.556	141.923	27.9868	141.875	0.415352	(1)	0.456529	(1)	0.364519	(1)	0.041177	(1)	-0.0508328	(1)	-0.0920099	(1)	-0.195833	(1)	0.355011	(1)	-0.196316	(1)	0.550843	(0.816)	-0.000483041	(1)	-0.551327	(1)
LOC411366	UPF0047 protein yjbQ-like	585.088	663.275	502.883	546.744	643.688	545.151	501.45	567.495	484.124	533.076	339.907	485.869	357.109	379.419	399.491	624.182	524.813	594.42	534.472	58.6	412.888	368.264	399.5	-0.250161	(1)	-0.070484	(1)	-0.22385	(1)	0.179677	(1)	0.0263111	(1)	-0.153366	(1)	-0.30078	(1)	-0.465792	(1)	-0.348368	(1)	-0.165012	(1)	-0.0475888	(1)	0.117423	(1)
LOC726983	geranylgeranyl transferase type-2 subunit	64.4503	67.0128	68.3265	64.8826	86.9849	84.9085	70.1056	70.3658	83.7132	64.3215	61.9457	87.77	59.3204	59.7585	60.9815	65.7316	66.6453	85.9467	7.23566	74.1734	74.8578	59.5394	6.98149	0.0190334	(1)	0.386855	(1)	0.095617	(1)	0.367822	(1)	0.0765835	(1)	-0.291238	(1)	0.0162901	(1)	-0.314018	(1)	-0.279492	(1)	-0.330308	(1)	-0.295782	(1)	0.0345258	(1)
LOC726977	prostaglandin E synthase 2-like	348.435	380.755	450.044	460.234	459.28	396.561	407.975	404.832	446.806	492.544	487.624	481.69	488.8	491.347	504.031	364.595	455.139	427.927	46.4352	469.675	484.657	49.7377	54.3675	0.320013	(1)	0.23105	(1)	0.156619	(1)	-0.088963	(1)	-0.163393	(1)	-0.0744305	(1)	0.0453001	(1)	0.0613351	(1)	0.101848	(1)	0.016035	(1)	0.0565476	(1)	0.0405126	(1)
LOC551372	hypothetical protein LOC551372	252.766	220.076	203.157	204.164	233.119	243.147	257.054	190.079	224.916	228.209	289.08	255.996	383.21	297.844	253.882	236.421	23.6662	238.133	223.566	226.563	272.538	34.5268	253.882	-0.215192	(1)	0.0104096	(1)	-0.0806565	(1)	0.225602	(1)	0.134536	(1)	-0.091066	(1)	0.266547	(1)	0.587858	(1)	0.164249	(1)	0.321312	(1)	-0.102298	(1)	-0.42361	(1)
IFT122 (LOC727298)	intraflagellar transport protein 122 homolog	786.495	945.033	948.372	1020.82	955.094	916.626	1113.9	992.431	664.662	824.725	625.811	769.032	692.862	661.137	497.808	865.764	984.595	935.86	153.165	744.694	697.421	677	497.887	0.185556	(1)	0.112318	(1)	0.282686	(1)	-0.0732385	(1)	0.0971293	(1)	0.170368	(1)	-0.0946169	(1)	-0.137492	(1)	-0.581058	(1)	-0.042875	(1)	-0.486441	(1)	-0.443566	(1)
LOC552360	glycosylphosphatidylinositol anchor attachment 1	1603.2	1728.63	1719.09	1623.79	1637.93	1741.59	1664.03	1702.49	1225.44	1460.01	1083.26	1346.85	978.787	1108.85	1096.42	1665.91	1671.44	1689.76	1683.26	1342.73	1215.53	143.819	196.422	0.0047811	(1)	0.0205015	(1)	0.0149435	(1)	0.0157204	(1)	0.0101624	(1)	-0.00555799	(1)	-0.144144	(1)	-0.363292	(1)	-0.29236	(1)	-0.219148	(1)	-0.148216	(1)	0.0709318	(1)
LOC409315	PRKCA-binding protein-like	600.194	607.685	568.476	560.585	611.504	623.305	592.976	599.48	568.846	657.313	643.283	620.659	599.136	675.365	640.928	63.9392	564.539	617.446	596.228	613.796	631.978	637.258	64.9279	-0.0973508	(1)	0.0318129	(1)	-0.0185392	(1)	0.129164	(1)	0.0788116	(1)	-0.050352	(1)	0.0437834	(1)	0.0557869	(1)	0.0640877	(1)	0.0120035	(1)	0.0203043	(1)	0.00830078	(1)
mRpS28 (LOC725538)	28S ribosomal protein S28, mitochondrial	219.534	203.323	251.441	197.243	242.688	228.674	218.106	241.254	257.191	267.86	297.022	278.983	285.924	320.609	268.816	211.429	224.342	235.689	229.681	262.525	288.244	33.2666	268.816	0.0855314	(1)	0.156665	(1)	0.119456	(1)	0.0711336	(1)	0.0339248	(1)	-0.0372088	(1)	0.133625	(1)	0.20813	(1)	0.0341646	(1)	0.0745057	(1)	-0.0994601	(1)	-0.173966	(1)
mRpL14 (LOC552097)	39S ribosomal protein L14, mitochondrial	324.266	304.604	316.124	325.278	321.844	344.458	296.001	309.792	340.904	404.433	487.624	350.035	361.855	386.059	364.644	314.435	32.7912	333.151	32.8967	372.668	418.829	373.957	364.644	0.0284676	(1)	0.0834161	(1)	-0.053935	(1)	0.0549485	(1)	-0.0824026	(1)	-0.137351	(1)	0.168471	(1)	0.00497821	(1)	-0.0314022	(1)	-0.163492	(1)	-0.199873	(1)	-0.0363804	(1)
LOC408284	mitochondrial import receptor subunit TOM40	2271.87	1960.89	2170.05	2032.99	1971.95	2146.83	2002.88	1944.65	1501.79	1507.59	1963.2	1650.91	1589.79	1686.52	1797.09	2116.39	211.518	259.395	1973.77	154.692	187.573	1638.15	1797.87	-0.0101672	(1)	-0.0393818	(1)	-0.100649	(1)	-0.0292145	(1)	-0.0904814	(1)	-0.0612668	(1)	0.264173	(1)	0.1226	(1)	0.256192	(1)	-0.141573	(1)	-0.00798166	(1)	0.133591	(1)
LOC725422	hypothetical protein LOC725422	1684.77	1350.92	1523.22	1484.51	1508.32	1451.16	1416.72	1395.44	1122.56	902.264	1691.59	1146.23	951.499	1152.48	1065.31	1517.84	153.869	1479.74	146.76	112.413	1418.91	151.992	165.393	-0.0133454	(1)	-0.0366803	(1)	-0.11035	(1)	-0.0233349	(1)	-0.0970045	(1)	-0.0736696	(1)	0.486989	(1)	0.0553252	(1)	0.0734738	(1)	-0.431664	(1)	-0.413515	(1)	0.0181486	(1)
LOC725389	hypothetical protein LOC725389	13442.9	13193.2	13085	12196.2	11355.9	11723.2	13744.6	11602.1	10830.3	10643	10773.8	10962.9	8548.07	10290.8	10093.1	13318.4	1264.59	11539.5	12673.4	1736.64	1868.34	9419.43	193.587	-0.0753187	(1)	-0.206799	(1)	-0.0715833	(1)	-0.13148	(1)	0.00373536	(1)	0.135216	(1)	0.0175892	(1)	-0.188831	(1)	-0.0891787	(1)	-0.20642	(1)	-0.106768	(1)	0.099652	(1)
pnr (LOC725350)	transcription factor GATA-5	35.2463	30.4604	30.9747	43.2551	36.5337	24.1217	17.5264	20.1045	25.2148	13.2168	41.2972	24.0322	13.0505	18.0224	19.9123	32.8533	37.1149	3.32769	18.8154	19.2158	32.6648	15.5364	19.9123	0.175957	(1)	-0.115404	(1)	-0.804122	(1)	-0.291361	(1)	-0.980079	(1)	-0.688718	(1)	0.765441	(1)	-0.306635	(1)	0.0513701	(1)	-1.07208	(1)	-0.714071	(1)	0.358005	(1)
LOC408285	hypothetical protein LOC408285 isoform 1	2622.32	2295.19	2358.63	2442.18	1958.03	2163.24	2439.09	1989.43	2010.12	2076.79	2353.94	1998.86	2396.54	2413.1	2313.56	2458.76	24.4511	26.6336	2214.27	243.458	2176.4	244.825	2313.56	-0.0346509	(1)	-0.254841	(1)	-0.151104	(1)	-0.22019	(1)	-0.116453	(1)	0.103737	(1)	0.0909288	(1)	0.234919	(1)	0.179104	(1)	0.14399	(1)	0.0881747	(1)	-0.055815	(1)
Ugt (LOC412198)	UDP-glucose:glycoprotein glucosyltransferase	7304.04	6867.29	7023.96	6772.88	7066.65	7219.15	6969.66	6629	4110.01	4602.07	4058.24	3927.71	4059.89	4299.76	4049.67	785.664	6898.42	7142.92	6799.33	4356.43	3992.97	4179.83	449.669	-0.0386374	(1)	0.011607	(1)	-0.05951	(1)	0.0502444	(1)	-0.0208726	(1)	-0.071117	(1)	-0.125555	(1)	-0.0595753	(1)	-0.105214	(1)	0.0659799	(1)	0.0203408	(1)	-0.0456391	(1)
LOC552253	mitochondrial chaperone BCS1-like	489.42	469.09	491.951	420.439	422.747	477.61	423.554	474.284	488.159	553.341	576.572	503.632	486.427	491.347	530.166	479.255	456.195	45.1784	448.919	52.7591	54.1258	488.887	53.1656	-0.0711427	(1)	-0.0902962	(1)	-0.0943378	(1)	-0.0191535	(1)	-0.0231951	(1)	-0.00404156	(1)	0.0526411	(1)	-0.0910889	(1)	0.0258521	(1)	-0.14373	(1)	-0.026789	(1)	0.116941	(1)
LOC552275	hypothetical protein LOC552275	420.941	360.956	343.454	361.612	360.117	395.596	413.818	304.309	346.956	363.901	263.666	297.791	306.093	381.316	350.955	39.9484	352.533	377.857	359.633	355.428	28.7287	343.746	35.9547	-0.149219	(1)	-0.0491383	(1)	-0.12274	(1)	0.10008	(1)	0.0264787	(1)	-0.0736015	(1)	-0.340383	(1)	-0.0483902	(1)	-0.0182745	(1)	0.291993	(1)	0.322108	(1)	0.0301156	(1)
Obp10 (LOC410068)	odorant binding protein 10	149.041	107.373	133.92	141.877	133.957	159.203	153.843	159.008	151.289	132.168	182.66	148.373	193.385	173.584	155.565	128.271	137.898	146.586	156.426	141.728	165.517	183.484	155.565	0.105128	(1)	0.193212	(1)	0.287	(1)	0.0880849	(1)	0.181872	(1)	0.0937874	(1)	0.223851	(1)	0.37253	(1)	0.134391	(1)	0.14868	(1)	-0.0894595	(1)	-0.238139	(1)
Obp11 (LOC677676)	odorant binding protein 11	16.1126	11.4226	15.4873	13.8416	10.4382	15.4379	8.7632	16.4491	14.1203	15.8601	12.7068	17.763	17.7961	20.868	19.9123	13.7676	14.6645	12.9385	12.6617	14.992	15.2349	19.3328	19.9123	0.091047	(1)	-0.0896588	(1)	-0.127149	(1)	-0.180706	(1)	-0.218196	(1)	-0.0374899	(1)	0.0233598	(1)	0.366977	(1)	0.409642	(1)	0.343618	(1)	0.386282	(1)	0.0426648	(1)
LOC725048	nodal modulator 2-like (>1 isoforms)	1598.17	1502.46	1459.45	1409.25	1756.22	1373.01	1455.66	1559.01	1470.53	1479.4	1162.67	1435.67	1168.61	1314.69	1169.85	155.313	1434.35	1564.62	157.339	1474.96	1299.17	1241.65	1169.85	-0.11216	(1)	0.0132501	(1)	-0.0405557	(1)	0.125411	(1)	0.0716048	(1)	-0.0538058	(1)	-0.183087	(1)	-0.24842	(1)	-0.334355	(1)	-0.0653323	(1)	-0.151268	(1)	-0.0859352	(1)
LOC724996	UPF0587 protein v1g245604-like	292.041	265.767	298.814	280.293	291.399	274.988	297.949	265.014	250.131	271.384	331.966	240.322	344.058	315.866	304.907	278.938	289.554	283.194	281.481	26.7574	286.144	329.962	34.9745	0.0540633	(1)	0.0220211	(1)	0.0132719	(1)	-0.0320422	(1)	-0.0407914	(1)	-0.00874925	(1)	0.134033	(1)	0.339593	(1)	0.225663	(1)	0.20556	(1)	0.0916299	(1)	-0.11393	(1)
LOC412715	hypothetical protein LOC412715	69.4855	69.2974	68.3265	75.2638	60.0196	71.4003	62.3161	106.006	90.7733	81.9439	42.8855	62.6928	84.235	79.6779	72.1822	69.3914	71.7951	65.7994	84.1681	86.3586	52.7892	81.9565	72.1822	0.0491283	(1)	-0.0786462	(1)	0.278391	(1)	-0.127774	(1)	0.229263	(1)	0.357037	(1)	-0.710098	(1)	-0.0754818	(1)	-0.258697	(1)	0.634616	(1)	0.451401	(1)	-0.183215	(1)
LOC100578797	hypothetical protein LOC100578797	159.112	150.017	138.475	119.384	134.827	145.695	104.185	126.11	164.401	224.685	211.251	217.335	175.588	176.43	189.167	154.565	128.929	14.269	115.147	194.543	214.293	176.98	189.168	-0.261628	(1)	-0.140097	(1)	-0.424728	(1)	0.121531	(1)	-0.163101	(1)	-0.284631	(1)	0.139498	(1)	-0.144437	(1)	-0.0404256	(1)	-0.283935	(1)	-0.179924	(1)	0.104011	(1)
LOC100578831		404.829	298.512	365.319	310.571	314.885	381.123	395.317	308.878	396.377	508.404	481.271	371.977	392.701	462.891	316.108	351.672	337.946	348.428	352.979	452.396	426.624	427.796	316.181	-0.0574343	(1)	-0.0151181	(1)	0.00175348	(1)	0.0423162	(1)	0.0591877	(1)	0.0168716	(1)	-0.0846037	(1)	-0.0806458	(1)	-0.517151	(1)	0.00395783	(1)	-0.432547	(1)	-0.436505	(1)
LOC100578769	hypothetical protein LOC100578769	3222.52	2801.59	3121.15	3026.12	2649.56	2819.35	2938.59	2862.15	1975.83	2018.64	2700.2	2172.31	1872.15	2048.86	2146.8	312.552	373.638	2734.45	29.3795	1997.24	2436.25	196.568	2146.8	0.0291993	(1)	-0.139496	(1)	-0.0545108	(1)	-0.168695	(1)	-0.08371	(1)	0.0849849	(1)	0.286659	(1)	-0.0267777	(1)	0.104182	(1)	-0.313437	(1)	-0.182478	(1)	0.130959	(1)
LOC100578731	hypothetical protein LOC100578731	11333.2	9406.17	15939.2	13182.4	10301.6	13250.5	13491.4	10851.9	5314.27	4677.85	18161.2	7419.7	5845.43	4885.97	4431.74	1369.68	1456.85	11776.8	12171.6	4996.69	1279.46	5365.7	4431.74	0.489719	(1)	0.183489	(1)	0.231153	(1)	-0.30623	(1)	-0.258566	(1)	0.0476644	(1)	1.3562	(0.631)	0.102975	(1)	-0.172919	(1)	-1.25323	(0.763)	-1.52912	(1)	-0.275894	(1)
LOC410201	phosphatidate phosphatase LPIN1-like	397.779	740.949	604.006	840.878	822.007	451.559	599.792	644.258	315.689	323.37	374.851	351.08	424.734	217.217	224.014	569.364	722.442	636.783	622.251	319.53	362.965	32.9757	224.136	0.34353	(1)	0.16145	(1)	0.127621	(1)	-0.18208	(1)	-0.215909	(1)	-0.0338291	(1)	0.183882	(1)	0.00651445	(1)	-0.512363	(1)	-0.177368	(1)	-0.696246	(1)	-0.518878	(1)
LOC410200	mRNA turnover protein 4 homolog	316.209	279.474	301.548	293.269	295.749	337.704	289.185	307.051	408.48	446.726	525.744	482.735	461.513	473.325	505.275	297.842	297.484	316.726	298.118	427.635	54.2396	467.419	55.2752	-0.00210058	(1)	0.0886911	(1)	0.00133773	(1)	0.0907917	(1)	0.00343832	(1)	-0.0873534	(1)	0.237837	(1)	0.128444	(1)	0.240797	(1)	-0.109393	(1)	0.00295987	(1)	0.112353	(1)
Pfk (Pfrx) (LOC724724)	LOW QUALITY PROTEIN: 6-phosphofructokinase	15378.5	14570	12844.5	13230.9	13855.8	13883.5	12329.8	13074.3	13735	14127.8	11113.7	12723.5	9772.45	11291.5	12210	14974.3	1337.67	13869.7	1272.75	13931.4	11918.6	1531.97	1229.99	-0.199795	(1)	-0.110547	(1)	-0.237416	(1)	0.0892475	(1)	-0.0376214	(1)	-0.126869	(1)	-0.225127	(1)	-0.403566	(1)	-0.19028	(1)	-0.178439	(1)	0.0348465	(1)	0.213286	(1)
LOC100578676		12734	11896.3	11852.4	11867.5	11753.4	12526.9	11541.1	11683.5	12540.8	12728.6	14847.9	12470.6	12027.8	12431.7	13542.9	12315.1	11859.9	1214.15	11612.3	12634.7	13659.3	12229.7	13542.9	-0.0543397	(1)	-0.0206472	(1)	-0.08478	(1)	0.0336926	(1)	-0.0304403	(1)	-0.0641328	(1)	0.112487	(1)	-0.0470015	(1)	0.100139	(1)	-0.159489	(1)	-0.0123482	(1)	0.147141	(1)
LOC410172	translocating chain-associated membrane protein	2267.85	2104.81	1791.06	1584.87	2212.03	2250.07	1679.61	1907.19	1053.98	1042.36	1950.5	1488.95	1111.66	1171.46	1499.65	2186.33	1687.96	2231.51	1793.4	148.175	1719.73	1141.56	1499.65	-0.373226	(1)	0.0292122	(1)	-0.285814	(1)	0.402438	(1)	0.0874119	(1)	-0.315026	(1)	0.714305	(0.128)	0.123134	(1)	0.51675	(1)	-0.591171	(0.411)	-0.197555	(1)	0.393616	(1)
LOC100577102	hypothetical protein LOC100577102	615.299	629.007	580.32	602.11	508.862	561.554	645.555	591.255	506.313	533.957	535.275	548.562	472.191	516.958	546.344	622.154	591.215	535.277	618.453	52.1355	541.918	494.574	546.344	-0.0735869	(1)	-0.217171	(1)	-0.00871695	(1)	-0.143584	(1)	0.06487	(1)	0.208454	(1)	0.0591894	(1)	-0.072699	(1)	0.0709243	(1)	-0.131888	(1)	0.0117349	(1)	0.143623	(1)
LOC724626	hypothetical protein LOC724626	4.02815	0.76151	1.82204	3.4604	6.08894	2.89461	0	1.82768	4.03437	3.52447	3.1767	4.17952	4.74563	2.84564	7.46712	2.39483	2.64122	4.49177	0.913841	3.77942	3.67811	3.79564	7.46712	0.141284	(1)	0.907364	(1)	-1.38991	(1)	0.76608	(1)	-1.53119	(1)	-2.29727	(1)	-0.0391984	(1)	0.0061779	(1)	0.982388	(1)	0.0453763	(1)	1.02159	(1)	0.97621	(1)
LOC100577069	hairy/enhancer-of-split related with YRPW motif	1.00704	0.76151	0.91102	1.7302	1.7397	0.964869	0	1.82768	3.02578	3.52447	3.1767	0	2.37282	2.84564	2.48904	0.884273	1.32619	1.35228	0.913841	3.27512	1.58835	2.69229	2.48944	0.578642	(1)	0.612834	(1)	0.0474515	(1)	0.034192	(1)	-0.53119	(1)	-0.565382	(1)	-1.04402	(1)	-0.327925	(1)	-0.395959	(1)	0.716093	(1)	0.648059	(1)	-0.0680338	(1)
BMS1 (LOC414048)	hypothetical protein LOC414048	654.574	609.969	600.362	606.436	653.256	669.619	670.871	590.341	787.711	734.851	665.519	678.127	664.389	689.594	680.753	632.271	63.3989	661.438	63.6633	761.29	671.823	676.991	68.7525	-0.067432	(1)	0.0650614	(1)	-0.0038044	(1)	0.132493	(1)	0.0636276	(1)	-0.0688658	(1)	-0.180347	(1)	-0.169292	(1)	-0.161299	(1)	0.0110548	(1)	0.0190484	(1)	0.00799352	(1)
LOC410171	filamin-A-like	1884.17	2181.73	1841.17	1924.85	2551.27	1660.54	2074.93	1798.44	2969.3	2629.25	2706.55	2505.62	3746.68	3336.99	2902.22	232.946	1883.14	215.931	1936.68	2799.27	266.875	3541.83	292.222	-0.11053	(1)	0.0508678	(1)	-0.0699822	(1)	0.161398	(1)	0.0405481	(1)	-0.12085	(1)	-0.103167	(1)	0.339443	(1)	0.0521047	(1)	0.442611	(0.743)	0.155272	(1)	-0.287339	(1)
LOC408282	hypothetical protein LOC408282	299.09	261.959	234.132	265.586	249.647	286.566	304.764	237.599	290.475	261.692	324.024	266.445	402.192	289.307	303.663	28.5246	249.859	268.164	271.182	276.831	295.234	345.75	33.6629	-0.167013	(1)	-0.0653216	(1)	-0.0488679	(1)	0.101691	(1)	0.118145	(1)	0.0164537	(1)	0.0967569	(1)	0.324625	(1)	0.137368	(1)	0.227868	(1)	0.0406112	(1)	-0.187257	(1)
LOC410195	COP9 signalosome complex subunit 6-like	765.348	773.694	850.892	793.298	678.482	823.033	844.188	785.903	706.015	733.089	795.764	665.589	792.521	803.419	724.311	769.527	822.952	75.7577	815.456	719.552	73.6766	797.97	724.317	0.095345	(1)	-0.0356128	(1)	0.0829206	(1)	-0.130958	(1)	-0.0124244	(1)	0.118533	(1)	0.0221342	(1)	0.149236	(1)	0.00951006	(1)	0.127102	(1)	-0.0126242	(1)	-0.139726	(1)
LOC100576915	hypothetical protein LOC100576915	392.744	420.353	371.696	388.43	421.877	338.669	354.423	425.85	342.921	366.545	365.321	375.112	335.754	331.043	345.977	46.5488	38.6329	38.2729	39.1363	354.733	37.2166	333.398	345.977	-0.097189	(1)	-0.0963934	(1)	-0.0594503	(1)	0.000795636	(1)	0.0377388	(1)	0.0369431	(1)	0.0616358	(1)	-0.0894871	(1)	-0.036059	(1)	-0.151123	(1)	-0.0976947	(1)	0.0534281	(1)
LOC408283	e3 ubiquitin-protein ligase RNF13-like	1208.44	1504.74	1231.7	1378.97	1416.11	1262.05	1321.3	1390.87	1013.64	1088.18	705.228	1004.13	857.773	926.73	845.029	1356.59	135.335	1339.81	1356.87	15.9725	854.679	892.252	845.293	-0.0555684	(1)	-0.0187448	(1)	-0.000545332	(1)	0.0368236	(1)	0.0550231	(1)	0.0181994	(1)	-0.29818	(1)	-0.236113	(1)	-0.314562	(1)	0.0620679	(1)	-0.0163818	(1)	-0.0784497	(1)
LOC100578182	hypothetical protein LOC100578182	14.0985	12.1842	13.6653	5.19061	9.56834	6.75408	16.5527	15.5353	10.0859	10.5734	11.1185	8.35904	5.93204	5.69128	6.2226	13.1413	9.42796	8.16121	16.4473	1.32966	9.73875	5.81166	6.22269	-0.479095	(1)	-0.687256	(1)	0.287922	(1)	-0.208161	(1)	0.767018	(1)	0.975179	(1)	-0.084984	(1)	-0.82977	(1)	-0.731203	(1)	-0.744786	(1)	-0.646219	(1)	0.098567	(1)
LOC100576882	hypothetical protein LOC100576882	193.351	329.734	210.446	277.697	245.297	161.133	344.686	322.586	260.217	140.979	155.658	195.393	166.097	146.076	125.697	261.542	244.715	23.2153	333.636	2.59774	175.526	156.867	125.697	-0.0997406	(1)	-0.364036	(1)	0.35123	(1)	-0.264295	(1)	0.45097	(1)	0.715265	(1)	-0.192624	(1)	-0.361958	(1)	-0.67436	(1)	-0.169334	(1)	-0.481736	(1)	-0.312403	(1)
LOC100578366		20.1407	17.5147	32.7967	16.4369	16.5271	13.5082	33.1054	22.846	12.1031	8.81117	22.2369	10.4488	15.4233	10.434	14.9342	18.8277	24.6168	15.1765	27.9757	1.45714	16.3429	12.9287	14.9342	0.386785	(1)	-0.3262	(1)	0.571316	(1)	-0.712985	(1)	0.184531	(1)	0.897516	(1)	0.644173	(1)	0.306085	(1)	0.514136	(1)	-0.338088	(1)	-0.130037	(1)	0.208051	(1)
LOC100578211		9.06333	12.1842	15.4873	15.5718	9.56834	15.4379	25.3159	21.9322	16.1375	17.6223	25.4136	18.8078	34.4058	25.6108	27.3794	1.62375	15.5296	12.5313	23.6244	16.88	22.1174	3.83414	27.3794	0.547727	(1)	0.234996	(1)	1.15296	(1)	-0.31273	(1)	0.605237	(1)	0.917968	(1)	0.38944	(1)	0.830055	(1)	0.697786	(1)	0.440615	(1)	0.308346	(1)	-0.132269	(1)
Cry2 (LOC410197)	cryptochrome 2	1288	871.167	849.981	916.142	802.87	908.907	787.714	890.995	620.284	497.831	555.923	635.287	450.835	611.813	705.643	179.583	883.617	855.889	839.354	559.576	595.652	531.324	75.6429	-0.289888	(1)	-0.33498	(1)	-0.363122	(1)	-0.0450913	(1)	-0.073234	(1)	-0.0281427	(1)	0.0913595	(1)	-0.0734052	(1)	0.335941	(1)	-0.164765	(1)	0.244582	(1)	0.409347	(1)
LOC410198	hypothetical protein LOC410198	276.935	326.688	307.014	324.413	327.063	268.234	338.844	324.414	294.509	293.412	222.369	313.464	268.128	266.542	240.192	31.8113	315.713	297.648	331.629	293.964	267.917	267.335	24.1924	0.064968	(1)	-0.0200379	(1)	0.135921	(1)	-0.0850058	(1)	0.0709535	(1)	0.155959	(1)	-0.133837	(1)	-0.136973	(1)	-0.291431	(1)	-0.00313587	(1)	-0.157594	(1)	-0.154458	(1)
AGO2 (LOC411577)	protein argonaute-2	2049.32	2357.63	2100.81	2750.16	2670.44	1992.45	3261.86	2405.23	5094.4	2916.5	4588.75	2569.36	3211.61	3120.72	2986.85	223.476	2425.48	2331.45	2833.54	45.4482	3579.55	3166.16	2986.85	0.138491	(1)	0.0814431	(1)	0.362826	(1)	-0.057048	(1)	0.224335	(1)	0.281383	(1)	-0.162385	(1)	-0.339228	(1)	-0.42334	(1)	-0.176843	(1)	-0.260955	(1)	-0.0841116	(1)
LOC410170	protein FAM13B-like isoform 1	1072.49	1246.59	1049.49	1237.96	1180.38	1180.03	1221.98	1113.06	1388.83	1313.75	1265.92	1337.45	1606.4	1426.61	1617.88	1159.54	1143.73	118.299	1167.52	1351.29	131.682	1516.56	1617.88	-0.0198128	(1)	0.0254877	(1)	0.00988995	(1)	0.0453005	(1)	0.0297028	(1)	-0.0155978	(1)	-0.0539588	(1)	0.166415	(1)	0.259766	(1)	0.220374	(1)	0.313725	(1)	0.0933503	(1)
LOC100577989	hypothetical protein LOC100577989	34.2392	29.6989	36.4408	30.2785	48.7115	39.5596	54.5265	47.5197	40.3437	50.2237	38.1204	50.1543	42.7107	57.8614	49.7808	31.9696	33.3597	44.1356	51.2314	45.2837	44.1374	5.28636	49.7887	0.0614285	(1)	0.465266	(1)	0.674476	(1)	0.403838	(1)	0.613047	(1)	0.20921	(1)	-0.0369909	(1)	0.151167	(1)	0.136599	(1)	0.188158	(1)	0.17359	(1)	-0.014568	(1)
LOC552618	hypothetical protein LOC552618	45.3166	54.0672	85.6359	58.8269	72.1975	71.4003	69.1319	77.6765	72.6186	80.1816	47.6506	73.1416	62.8796	72.0896	77.1603	49.6919	72.2314	71.7989	73.4418	76.4137	6.39694	67.4846	77.1625	0.539614	(1)	0.53095	(1)	0.562851	(1)	-0.00866399	(1)	0.023237	(1)	0.0319009	(1)	-0.33912	(1)	-0.179017	(1)	0.0142826	(1)	0.160103	(1)	0.353403	(1)	0.193299	(1)
LOC100577950	hypothetical protein LOC100577950	4.02815	4.56906	8.19918	2.5953	13.9176	5.78921	5.84213	9.13841	14.1203	7.04893	6.35341	5.2244	9.49127	9.48547	8.71164	4.29862	5.39724	9.8534	7.49277	1.58461	5.78895	9.48837	8.71164	0.328354	(1)	1.19675	(1)	0.80115	(1)	0.868399	(1)	0.472796	(1)	-0.395603	(1)	-0.870606	(1)	-0.157737	(1)	-0.280952	(1)	0.712869	(1)	0.589654	(1)	-0.123215	(1)
LOC408286	2-oxoglutarate dehydrogenase, mitochondrial-like	4902.25	5926.83	4536.88	5272.79	5510.49	4785.75	4662.99	5303.02	4786.78	5380.1	3416.55	5337.25	4046.84	3835.92	3960.06	5414.54	494.834	5148.12	4983.68	583.44	4376.9	3941.38	396.632	-0.142635	(1)	-0.072793	(1)	-0.119823	(1)	0.0698416	(1)	0.0228121	(1)	-0.0470295	(1)	-0.215896	(1)	-0.367104	(1)	-0.360281	(1)	-0.151207	(1)	-0.144385	(1)	0.00682215	(1)
Zasp66 (LOC726668)	PDZ and LIM domain protein 3	627.384	534.58	520.192	456.773	507.122	523.924	579.345	439.558	723.161	586.824	778.292	429.446	675.066	643.115	696.931	58.9817	488.483	515.523	59.4518	654.992	63.8692	659.957	696.931	-0.250185	(1)	-0.172456	(1)	-0.189549	(1)	0.0777287	(1)	0.0606359	(1)	-0.0170928	(1)	-0.117242	(1)	0.00899896	(1)	0.0895387	(1)	0.126241	(1)	0.20678	(1)	0.0805397	(1)
LOC408288	isovaleryl-CoA dehydrogenase,	374.618	373.14	455.51	420.439	381.864	415.859	463.476	403.918	360.067	385.048	424.09	341.676	478.123	340.528	393.268	373.879	437.974	398.862	433.697	372.558	382.883	49.3254	393.268	0.228277	(1)	0.0933164	(1)	0.214117	(1)	-0.13496	(1)	-0.0141603	(1)	0.1208	(1)	0.0394393	(1)	0.135784	(1)	0.0780501	(1)	0.096345	(1)	0.0386108	(1)	-0.0577342	(1)
RpIII128 (LOC552658)	DNA-directed RNA polymerase III subunit RPC2	678.743	615.3	610.383	646.23	701.968	686.022	691.319	646.086	553.717	613.257	665.519	614.39	663.202	608.019	652.129	647.212	628.368	693.995	668.723	583.487	639.955	635.614	652.129	-0.0423436	(1)	0.101112	(1)	0.047551	(1)	0.143456	(1)	0.0898946	(1)	-0.0535613	(1)	0.133268	(1)	0.123442	(1)	0.160455	(1)	-0.00982674	(1)	0.0271869	(1)	0.0370137	(1)
LOC552663	pyridoxal kinase-like	1555.87	1665.42	1697.23	1832.28	1671.85	1809.13	1565.69	1710.71	1147.78	1202.72	1216.68	1206.84	1105.73	1088.93	1147.45	161.646	1764.76	174.489	1638.27	1175.25	1211.76	197.332	1147.45	0.13183	(1)	0.111853	(1)	0.0244724	(1)	-0.0199763	(1)	-0.107357	(1)	-0.0873809	(1)	0.0441315	(1)	-0.0989688	(1)	-0.0345409	(1)	-0.1431	(1)	-0.0786724	(1)	0.0644279	(1)
LOC100577672	hypothetical protein LOC100577672	356.491	419.592	408.137	421.304	402.74	421.648	434.265	440.471	358.05	398.265	327.201	363.618	417.616	387.956	378.334	388.413	414.725	412.194	437.368	378.158	345.494	42.7858	378.334	0.095929	(1)	0.0871128	(1)	0.172638	(1)	-0.00881629	(1)	0.076709	(1)	0.0855253	(1)	-0.13068	(1)	0.0910252	(1)	0.000673616	(1)	0.221705	(1)	0.131353	(1)	-0.0903515	(1)
Atp5d (LOC552682)	ATP synthase subunit delta, mitochondrial	1464.23	1564.14	1807.46	1592.65	1519.63	1650.89	1513.11	1561.75	1420.1	1655.62	1969.56	1586.13	1611.14	1610.63	1630.32	1514.19	17.5743	1585.26	1537.43	1537.86	1777.84	161.888	163.321	0.167041	(1)	0.0661758	(1)	0.0219814	(1)	-0.100865	(1)	-0.14506	(1)	-0.0441944	(1)	0.209205	(1)	0.0669333	(1)	0.084234	(1)	-0.142272	(1)	-0.124971	(1)	0.0173006	(1)
LOC410202	radial spoke head protein 3 homolog	0	0	0	0	0	0	0	0	0	0	0	0	0	0	0
LOC100577603		19.1337	16.7532	20.9535	16.4369	13.9176	13.5082	21.4211	18.2768	26.2234	16.7412	22.2369	21.9425	23.7282	25.6108	28.624	17.9435	18.6952	13.7129	19.849	21.4824	22.8978	24.6695	28.624	0.0592094	(1)	-0.387926	(1)	0.145608	(1)	-0.447136	(1)	0.0863983	(1)	0.533534	(1)	0.0402253	(1)	0.199577	(1)	0.414074	(1)	0.159352	(1)	0.373849	(1)	0.214497	(1)
LOC410203	POU domain protein CF1A-like	223.562	210.938	182.204	184.267	208.764	190.079	192.79	191.907	308.629	246.713	200.132	220.47	242.027	199.195	233.97	217.251	183.235	199.421	192.348	277.68	21.3156	22.6118	233.97	-0.24566	(1)	-0.123536	(1)	-0.175635	(1)	0.122124	(1)	0.0700254	(1)	-0.0520983	(1)	-0.40092	(1)	-0.331871	(1)	-0.247054	(1)	0.0690491	(1)	0.153866	(1)	0.0848171	(1)
LOC726488	hypothetical protein LOC726488	695.862	702.112	600.362	634.984	742.851	626.2	633.871	654.31	668.697	677.579	506.684	714.698	551.68	571.025	629.727	698.987	617.674	684.525	644.969	673.138	61.6912	561.353	629.727	-0.178422	(1)	-0.0301615	(1)	-0.118002	(1)	0.148261	(1)	0.0604204	(1)	-0.0878404	(1)	-0.140459	(1)	-0.261995	(1)	-0.0961748	(1)	-0.121536	(1)	0.0442839	(1)	0.16582	(1)
LOC551473	uncharacterized protein C16orf52 homolog A-like	295.062	280.997	297.903	277.697	255.736	311.653	294.054	277.808	252.148	251.999	306.552	242.412	228.977	289.307	267.572	288.294	287.844	283.694	285.938	252.737	274.483	259.142	267.572	-0.00114709	(1)	-0.0218796	(1)	-0.0105499	(1)	-0.0207325	(1)	-0.00940277	(1)	0.0113297	(1)	0.122866	(1)	0.039896	(1)	0.0860805	(1)	-0.0829702	(1)	-0.0367857	(1)	0.0461845	(1)
ldbr (LOC551497)	lariat debranching enzyme	100.704	95.9502	115.7	106.407	104.382	107.1	109.053	119.713	92.7905	113.664	93.7128	101.353	96.0991	111.929	104.54	98.3269	111.535	15.7412	114.383	13.2273	97.5338	14.1385	14.5397	0.175596	(1)	0.104879	(1)	0.218216	(1)	-0.0707173	(1)	0.04262	(1)	0.113337	(1)	-0.0818607	(1)	0.0109507	(1)	0.0182266	(1)	0.0928115	(1)	0.100087	(1)	0.00727585	(1)
LOC100577423	methyltransferase-like protein 4-like	60.4222	62.4438	38.2628	51.041	36.5337	49.2083	47.7107	54.8305	47.4038	59.9159	60.3574	62.6928	64.0661	66.3983	53.5144	61.433	44.6519	42.8799	51.276	53.6599	61.526	65.2322	53.5144	-0.460292	(1)	-0.519012	(1)	-0.260882	(1)	-0.0587198	(1)	0.19941	(1)	0.25813	(1)	0.197331	(1)	0.281739	(1)	-0.00391781	(1)	0.0844085	(1)	-0.201249	(1)	-0.285657	(1)
LOC409499	probable UDP-glucose 4-epimerase-like	428.998	197.231	424.535	378.914	390.562	384.018	365.133	414.884	510.348	605.327	765.586	479.6	525.579	665.88	455.494	313.114	41.7247	387.294	39.8547	557.837	622.593	595.729	455.494	0.359518	(1)	0.306725	(1)	0.316816	(1)	-0.052793	(1)	-0.0427016	(1)	0.0100913	(1)	0.158444	(1)	0.0948123	(1)	-0.292412	(1)	-0.0636319	(1)	-0.450856	(1)	-0.387224	(1)
LOC551588	factor VIII intron 22 protein-like	331.315	344.202	374.429	365.073	340.981	398.491	381.686	373.761	312.664	355.971	424.09	348.99	373.719	338.631	408.203	337.759	369.759	369.736	377.723	334.317	386.541	356.175	48.2262	0.130561	(1)	0.130502	(1)	0.161338	(1)	-5.86725e-05	(1)	0.0307768	(1)	0.0308354	(1)	0.209399	(1)	0.0913676	(1)	0.288067	(1)	-0.118032	(1)	0.0786677	(1)	0.196699	(1)
LOC726389	glycerophosphodiester phosphodiesterase 1-like	594.151	541.433	607.65	570.967	561.922	572.167	592.976	596.738	592.044	601.803	841.827	760.673	626.424	693.388	729.289	567.792	589.384	567.448	594.857	596.923	81.2497	659.957	729.289	0.0536593	(1)	-0.00190073	(1)	0.0671799	(1)	-0.05556	(1)	0.0135206	(1)	0.0690806	(1)	0.424707	(1)	0.144714	(1)	0.288945	(1)	-0.279992	(1)	-0.135762	(1)	0.14423	(1)
LOC100577308		27.19	39.5985	48.284	44.1202	47.8417	56.9273	51.6055	46.6059	56.4812	45.8181	46.0622	57.4684	66.4389	85.3692	80.8938	33.3942	46.2298	52.3845	49.157	51.1496	51.7653	75.9445	8.89381	0.468359	(1)	0.64954	(1)	0.556291	(1)	0.181181	(1)	0.0879318	(1)	-0.0932492	(1)	0.0172622	(1)	0.569453	(1)	0.661306	(1)	0.552191	(1)	0.644044	(1)	0.0918526	(1)
LOC100576572	serine/threonine-protein kinase RIO1-like	409.864	410.454	432.734	429.955	421.007	414.894	463.476	417.625	358.05	374.475	374.851	368.843	368.973	383.213	370.867	41.1588	431.345	417.953	44.5553	366.262	371.847	376.93	37.8672	0.0726591	(1)	0.0271489	(1)	0.103125	(1)	-0.0455102	(1)	0.030466	(1)	0.0759762	(1)	0.021831	(1)	0.0382115	(1)	0.0180242	(1)	0.0163805	(1)	-0.00380687	(1)	-0.0201874	(1)
LOC726326		206.442	226.93	262.374	264.721	228.77	243.147	253.159	265.928	204.744	273.146	258.901	307.195	282.365	277.924	255.127	216.686	263.547	235.959	259.543	238.945	283.481	28.1447	255.127	0.282455	(1)	0.122927	(1)	0.260369	(1)	-0.159528	(1)	-0.0220862	(1)	0.137442	(1)	0.244367	(1)	0.229492	(1)	0.0945336	(1)	-0.014875	(1)	-0.149834	(1)	-0.134959	(1)
LOC100576531	RNA pseudouridylate synthase domain-containing	8.05629	8.37661	10.0212	6.05571	4.34924	4.82435	3.89475	7.31073	7.06015	4.40558	4.76506	10.4488	11.8641	10.434	9.95616	8.21645	8.38462	4.58679	5.62741	5.73286	7.6693	11.1495	9.95616	-0.0315954	(1)	-0.841029	(1)	-0.552382	(1)	-0.809433	(1)	-0.520787	(1)	0.288647	(1)	0.408058	(1)	0.959593	(1)	0.796333	(1)	0.551535	(1)	0.388275	(1)	-0.163259	(1)
RANBP2 (LOC726272)	LOW QUALITY PROTEIN: e3 SUMO-protein ligase	1421.94	1746.14	1450.34	1891.98	1975.43	1448.27	1547.19	1721.68	1703.51	1641.52	1419.99	1898.55	1662.16	1538.54	1517.07	1584.38	1671.16	1711.85	1634.43	1672.52	1659.27	16.3558	1517.72	0.0772422	(1)	0.111947	(1)	0.0451835	(1)	0.0347047	(1)	-0.0320587	(1)	-0.0667633	(1)	-0.0114742	(1)	-0.0636324	(1)	-0.140733	(1)	-0.0521582	(1)	-0.129258	(1)	-0.0771002	(1)
LOC408291	3-ketoacyl-CoA thiolase, mitochondrial-like	3676.69	3508.27	3594.88	3300.36	3538.55	3775.53	3615.3	3058.63	1951.63	1947.27	2622.37	1841.08	2228.07	2291.69	2276.23	3592.48	3447.62	3657.39	3336.97	1949.45	2231.72	2259.88	2276.23	-0.0593794	(1)	0.0256949	(1)	-0.106444	(1)	0.0850743	(1)	-0.0470648	(1)	-0.132139	(1)	0.195094	(1)	0.213182	(1)	0.22358	(1)	0.0180888	(1)	0.028486	(1)	0.0103972	(1)
LOC100576462	odorant receptor 2a-like	30.2111	28.9374	43.7289	43.2551	31.3146	41.4894	35.0528	43.8644	26.2234	29.0769	23.8253	21.9425	23.7282	27.5079	24.8904	29.5742	43.492	36.4196	39.4586	27.6513	22.8839	25.6181	24.8944	0.556409	(1)	0.299676	(1)	0.415998	(1)	-0.256734	(1)	-0.140411	(1)	0.116323	(1)	-0.272954	(1)	-0.110127	(1)	-0.151696	(1)	0.162827	(1)	0.121258	(1)	-0.041569	(1)
LOC410207	dihydropyrimidine dehydrogenase [NADP+]-like	3903.27	4042.85	3342.53	3639.48	3238.45	3814.13	3154.75	3464.37	1640.98	1941.1	2241.16	1953.93	1519.79	1558.46	1736.11	3973.64	3491.57	3526.29	339.561	1791.4	297.545	1539.13	1736.16	-0.186609	(1)	-0.172102	(1)	-0.263612	(1)	0.0145073	(1)	-0.0770028	(1)	-0.0915101	(1)	0.227905	(1)	-0.218686	(1)	-0.0449428	(1)	-0.446591	(0.845)	-0.272847	(1)	0.173744	(1)
LOC410206	differentially expressed in FDCP 8 homolog	843.897	809.485	894.621	897.975	758.508	863.558	945.451	811.491	767.539	837.942	980.013	811.872	881.501	928.627	872.409	826.696	896.298	811.33	878.471	82.7443	895.943	95.6447	872.487	0.116631	(1)	-0.0275869	(1)	0.0876474	(1)	-0.144218	(1)	-0.0289837	(1)	0.115234	(1)	0.158473	(1)	0.173087	(1)	0.120071	(1)	0.0146141	(1)	-0.0384023	(1)	-0.0530164	(1)
LOC410205	gastrulationDEFective protein 1 homolog	775.418	836.138	819.918	836.553	804.61	824.963	841.267	804.18	695.929	762.166	717.935	733.506	688.117	744.609	705.643	85.7778	828.235	814.787	822.723	729.474	725.726	716.364	75.6429	0.0396585	(1)	0.0160402	(1)	0.0300256	(1)	-0.0236183	(1)	-0.00963294	(1)	0.0139853	(1)	-0.00659837	(1)	-0.0253215	(1)	-0.0470742	(1)	-0.0187232	(1)	-0.0404758	(1)	-0.0217526	(1)
LOC726121	hypothetical protein LOC726121	111.781	85.2891	92.013	81.3195	82.6356	103.241	67.1845	68.5381	130.108	107.496	96.8895	85.6802	167.284	133.745	131.919	98.5356	86.6662	92.9383	67.8613	118.823	91.2848	15.5143	131.919	-0.185167	(1)	-0.0843637	(1)	-0.538048	(1)	0.100803	(1)	-0.352881	(1)	-0.453685	(1)	-0.380116	(1)	0.341338	(1)	0.151091	(1)	0.721454	(0.816)	0.531207	(1)	-0.190247	(1)
LOC410204	hypothetical protein LOC410204	8373.51	7877.06	8180.96	7932.98	7010.11	8144.46	9121.51	6743.23	7175.12	6500.88	8092.65	7280.73	6779.14	7709.79	8966.77	8125.28	856.967	7577.29	7932.37	6838.26	7686.69	7244.46	8966.77	-0.012181	(1)	-0.100737	(1)	-0.0346653	(1)	-0.0885556	(1)	-0.0224842	(1)	0.0660714	(1)	0.168788	(1)	0.0833038	(1)	0.391013	(1)	-0.0854837	(1)	0.222226	(1)	0.307709	(1)
LOC551967	probable tubulin polyglutamylase TTLL2-like	85.5981	125.649	99.3011	75.2638	105.252	87.8031	57.4476	84.0734	48.4124	51.1048	44.4739	55.3787	45.0835	53.1186	51.0253	15.6236	87.2825	96.5274	7.76499	49.7586	49.9263	49.1172	51.2533	-0.275168	(1)	-0.129922	(1)	-0.577916	(1)	0.145247	(1)	-0.302748	(1)	-0.447994	(1)	0.00485283	(1)	-0.0191914	(1)	0.0362676	(1)	-0.0240443	(1)	0.0314148	(1)	0.055459	(1)
LOC550651	40S ribosomal protein S4-like isoform 1	13680.6	12206.2	12368.9	12636.5	11957.8	13079.8	12682.3	11265.8	10504.5	11262.4	14712.9	11866.7	12291.2	12203.1	12797.4	12943.4	1252.72	12518.8	11974.6	1883.46	13289.9	12247.1	12797.4	-0.0499759	(1)	-0.0481232	(1)	-0.112305	(1)	0.00185264	(1)	-0.0623296	(1)	-0.0641823	(1)	0.288182	(1)	0.170305	(1)	0.233713	(1)	-0.117877	(1)	-0.0544691	(1)	0.063408	(1)
LOC551986	putative deoxyribose-phosphate aldolase-like	476.328	461.475	537.502	516.465	527.998	591.465	410.896	424.936	511.356	452.894	425.678	298.836	402.192	432.537	349.71	468.915	526.983	559.731	417.916	482.125	362.258	417.365	349.712	0.168473	(1)	0.25545	(1)	-0.166071	(1)	0.0869772	(1)	-0.334544	(1)	-0.421521	(1)	-0.412394	(0.977)	-0.208098	(1)	-0.463248	(1)	0.204295	(1)	-0.050854	(1)	-0.25515	(1)
LOC552015	putative ATPase N2B-like	220.541	229.214	308.836	291.539	297.488	290.426	250.238	275.98	334.853	380.642	290.668	297.791	390.328	346.22	303.663	224.878	3.18736	293.957	263.19	357.748	294.23	368.274	33.6629	0.416723	(1)	0.386464	(1)	0.22652	(1)	-0.0302584	(1)	-0.190203	(1)	-0.159944	(1)	-0.281999	(1)	0.0418376	(1)	-0.236471	(1)	0.323837	(1)	0.0455281	(1)	-0.278309	(1)
LOC552042	rab-like protein 3-like	130.915	145.448	150.318	131.495	145.265	150.52	148.974	155.353	138.177	125.119	162.012	138.969	148.301	149.87	134.408	138.182	14.9684	147.892	152.164	131.648	15.495	149.857	134.482	0.0281764	(1)	0.0979808	(1)	0.139059	(1)	0.0698043	(1)	0.110883	(1)	0.0410782	(1)	0.192988	(1)	0.179458	(1)	0.0299368	(1)	-0.0135302	(1)	-0.163051	(1)	-0.149521	(1)
TfIIEalpha (LOC411786)	general transcription factor IIE subunit 1	198.386	191.9	215.912	178.211	190.497	215.166	169.422	205.614	215.839	196.489	292.257	210.021	191.012	225.754	266.327	195.143	197.612	22.8313	187.518	26.1639	251.139	28.383	266.327	0.0141101	(1)	0.0557467	(1)	-0.0575047	(1)	0.0416366	(1)	-0.0716148	(1)	-0.113251	(1)	0.284694	(1)	0.0154456	(1)	0.369409	(1)	-0.269248	(1)	0.0847151	(1)	0.353963	(1)
Arr2 (LOC550791)	arrestin homolog (>1 isoforms)	35.2463	40.36	45.551	25.953	40.8829	42.4542	38.9475	38.3813	36.3093	45.8181	52.4156	40.7503	122.2	33.1991	38.5801	37.8314	35.7528	41.6686	38.6644	41.637	46.583	77.6997	38.5813	-0.0804819	(1)	0.140453	(1)	0.0325008	(1)	0.220935	(1)	0.112983	(1)	-0.107952	(1)	0.181939	(1)	0.920044	(1)	-0.0900057	(1)	0.738104	(1)	-0.271945	(1)	-1.01005	(1)
akirin (LOC411785)	akirin-2 (>1 isoforms)	1531.7	1440.01	1357.42	1309.76	1298.68	1404.85	1387.51	1345.17	1325.29	1267.05	1110.26	1304.01	1125.9	1263.46	1273.14	1485.86	1333.59	1351.77	1366.34	1296.17	127.134	1194.68	1273.14	-0.15598	(1)	-0.13645	(1)	-0.12098	(1)	0.0195299	(1)	0.0350001	(1)	0.0154703	(1)	-0.102667	(1)	-0.117625	(1)	-0.0258571	(1)	-0.0149584	(1)	0.0768095	(1)	0.0917679	(1)
LOC409201	acyl-protein thioesterase 1-like	816.707	688.405	743.392	737.066	741.981	750.668	704.95	704.571	609.19	699.607	724.288	676.038	615.746	622.247	619.771	752.556	74.2298	746.325	74.7694	654.398	7.16358	618.996	619.772	-0.0238264	(1)	-0.011995	(1)	-0.0946642	(1)	0.0118314	(1)	-0.0708378	(1)	-0.0826692	(1)	0.0975221	(1)	-0.080238	(1)	-0.0784335	(1)	-0.17776	(1)	-0.175956	(1)	0.00180448	(1)
LOC552143	peroxisomal 3,2-trans-enoyl-CoA isomerase-like	113.795	134.026	134.831	102.947	113.95	140.871	142.159	121.541	122.04	113.664	122.303	91.9495	107.963	100.546	112.007	123.914	118.889	127.415	131.85	117.852	17.1263	14.2546	112.682	-0.0596825	(1)	0.0401873	(1)	0.0895968	(1)	0.0998698	(1)	0.149279	(1)	0.0494095	(1)	-0.137662	(1)	-0.176864	(1)	-0.0733881	(1)	-0.039202	(1)	0.064274	(1)	0.103476	(1)
LOC552169	DNA repair and recombination protein	31.2181	22.0838	33.7077	37.1993	29.5749	40.5245	36.0265	39.2952	35.3007	31.7202	28.5903	18.8078	36.7787	33.1991	32.3575	26.6595	35.4535	35.4968	37.6682	33.5147	23.6999	34.989	32.3575	0.411742	(1)	0.395214	(1)	0.498877	(1)	-0.0165283	(1)	0.0871348	(1)	0.103663	(1)	-0.49978	(1)	0.0622855	(1)	-0.0505105	(1)	0.562066	(1)	0.44927	(1)	-0.112796	(1)
LOC725655	bladder cancer-associated protein-like	228.597	236.068	237.776	234.442	233.989	244.112	222.975	256.789	222.899	228.209	241.429	274.804	223.045	232.394	222.769	232.333	236.193	239.563	239.882	225.555	258.117	227.719	222.769	0.0232629	(1)	0.0411243	(1)	0.0461331	(1)	0.0178614	(1)	0.0228703	(1)	0.00500884	(1)	0.194549	(1)	0.0137837	(1)	-0.0179241	(1)	-0.180765	(1)	-0.212473	(1)	-0.0317079	(1)
LOC409552	40S ribosomal protein S10-like	11124.7	10478.4	10613.4	10341.4	9502.23	11164.5	10755.4	9905.12	9106.58	9134.54	13902.8	10215.8	11161.7	10792.6	11656.2	181.552	1477.4	1333.36	133.243	912.559	1259.32	1977.15	11656.2	-0.043958	(1)	-0.0639286	(1)	-0.0643644	(1)	-0.0199705	(1)	-0.0204064	(1)	-0.000435852	(1)	0.402954	(1)	0.267309	(1)	0.3539	(1)	-0.135645	(1)	-0.049054	(1)	0.0865913	(1)
LOC552189	sorting nexin-17-like	132.929	185.047	198.602	168.695	194.846	192.009	149.948	149.87	146.246	195.608	177.895	189.123	294.229	228.6	243.926	158.988	183.648	193.428	149.99	17.927	183.594	261.415	243.926	0.208031	(1)	0.282877	(1)	-0.0848295	(1)	0.0748461	(1)	-0.29286	(1)	-0.367706	(1)	0.102474	(1)	0.61296	(1)	0.513064	(1)	0.510486	(1)	0.410589	(1)	-0.0998961	(1)
LOC410208	serine/threonine-protein kinase 3-like isoform	250.752	204.085	235.954	239.633	247.037	220.955	261.922	243.082	239.036	235.258	158.835	207.931	174.402	204.886	175.477	227.418	237.794	233.996	252.52	237.147	183.383	189.645	175.477	0.0643611	(1)	0.0411356	(1)	0.150946	(1)	-0.0232254	(1)	0.086585	(1)	0.10981	(1)	-0.370922	(1)	-0.322489	(1)	-0.434499	(1)	0.0484329	(1)	-0.0635767	(1)	-0.11201	(1)
LOC408292	yorkie homolog	648.531	777.501	608.561	689.486	851.582	631.989	717.608	640.603	888.57	741.019	519.391	650.96	526.765	678.211	691.953	713.164	649.233	741.786	679.155	814.795	585.176	62.4882	691.953	-0.135665	(1)	0.0570671	(1)	-0.0702996	(1)	0.192732	(1)	0.0653653	(1)	-0.127367	(1)	-0.477566	(1)	-0.435503	(1)	-0.235762	(1)	0.0420628	(1)	0.241804	(1)	0.199742	(1)
Hb (LOC410209)	protein hunchback	0	0	0	1.7302	1.7397	0	0	0	1.00859	0	0	0	0	0.948547	1.24452		0.865114	0.869849		0.542961		0.474273	1.24452							0.00789609	(1)							-0.088552	(1)	1.30325	(1)					1.3918	(1)
LOC100576217	adenylate cyclase type 10-like	0	0.76151	0	0	0	0.964869	1.94738	0	0	0	0	0	0	2.84564	3.73356	0.387548		0.482435	0.973688			1.42282	3.73357			0.341471	(1)	1.3546	(1)					1.01313	(1)											1.3918	(1)
LOC100576518	hypothetical protein LOC100576518	6.04222	6.85359	6.37714	10.3812	4.34924	6.75408	3.89475	6.39689	5.04296	2.64335	6.35341	10.4488	3.55923	7.58838	9.95616	6.44792	8.37918	5.55166	5.14583	3.84316	8.4116	5.57382	9.95616	0.377978	(1)	-0.21591	(1)	-0.325429	(1)	-0.593888	(1)	-0.703407	(1)	-0.109519	(1)	1.12829	(1)	0.53637	(1)	1.3733	(1)	-0.591918	(1)	0.24501	(1)	0.836928	(1)
Cda5 (LOC552276)	hypothetical protein LOC552276	1312.17	1169.68	999.389	962.857	908.122	1102.85	1109.03	1088.38	994.472	978.04	1159.5	873.52	989.465	1035.81	1102.64	124.924	981.123	15.4838	198.779	986.256	116.585	112.639	112.645	-0.338908	(1)	-0.303525	(1)	-0.175606	(1)	0.0353838	(1)	0.163302	(1)	0.127918	(1)	0.0435884	(1)	0.038086	(1)	0.160934	(1)	-0.00550245	(1)	0.117346	(1)	0.122848	(1)
ttv (LOC408293)	exostosin-1	558.905	640.43	450.955	472.345	615.853	510.416	461.528	580.289	497.236	450.251	419.325	483.78	446.09	514.112	510.253	599.667	461.65	563.134	52.9874	473.743	451.552	48.1978	51.2533	-0.377363	(1)	-0.0906834	(1)	-0.203132	(1)	0.28668	(1)	0.174231	(1)	-0.112449	(1)	-0.0692126	(1)	0.0192322	(1)	0.107108	(1)	0.0884449	(1)	0.176321	(1)	0.0878757	(1)
LOC408294	protein FAM76A-like	1535.73	1479.61	1572.42	1312.36	1222.14	1265.91	1559.85	1315.02	1224.43	1225.63	1918.73	1242.36	1246.92	1347.89	1301.77	157.672	1442.39	1244.23	1437.43	1225.32	158.546	1297.42	131.768	-0.063862	(1)	-0.277309	(1)	-0.0688277	(1)	-0.213447	(1)	-0.00496565	(1)	0.208482	(1)	0.367603	(1)	0.0828038	(1)	0.0876528	(1)	-0.284799	(1)	-0.279951	(1)	0.00484896	(1)
Blimp-1 (LOC408295)	hypothetical protein LOC408295	3.02111	8.37661	0.91102	2.5953	0.869849	1.92974	0	1.82768	3.02578	0	0	2.08976	0	1.89709	0	5.69886	1.75316	1.39979	0.913841	1.51289	1.44884	0.948547		-1.70071	(1)	-2.02546	(1)	-2.64066	(1)	-0.324745	(1)	-0.939944	(1)	-0.615199	(1)	-0.533968	(1)	-0.673514	(1)			-0.139547	(1)
Lmpt (LOC410211)	four and a half LIM domains protein 2	18033	16214.1	13981.4	13422	14433.4	13622	15555.6	13112.7	11453.6	10147.8	10063.8	8015.28	10444	10569.7	10910.7	17123.5	1371.74	1427.71	14334.2	18.6986	939.538	156.854	191.785	-0.321622	(1)	-0.287701	(1)	-0.256521	(1)	0.0339215	(1)	0.0651008	(1)	0.0311793	(1)	-0.256804	(1)	-0.0398005	(1)	0.0146202	(1)	0.217003	(1)	0.271424	(1)	0.0544207	(1)
LOC725155	hypothetical protein LOC725155	1470.27	1242.02	1173.39	1255.26	1187.34	1261.08	1308.64	1187.99	1467.5	1451.2	1637.59	1480.6	1534.03	1535.7	1606.68	1356.15	1214.33	1224.21	1248.32	1459.36	1559.93	1534.86	166.676	-0.159357	(1)	-0.147659	(1)	-0.119532	(1)	0.0116979	(1)	0.0398248	(1)	0.0281269	(1)	0.0953807	(1)	0.0727822	(1)	0.138752	(1)	-0.0225985	(1)	0.0433715	(1)	0.06597	(1)
LOC552353	hypothetical protein LOC552353	220.541	215.507	208.624	215.41	197.456	215.166	194.738	190.993	225.925	261.692	260.49	241.367	270.501	276.976	240.192	218.25	212.168	26.3174	192.865	243.882	25.9285	273.738	24.1924	-0.0403088	(1)	-0.0796687	(1)	-0.176894	(1)	-0.0393599	(1)	-0.136586	(1)	-0.0972258	(1)	0.0415301	(1)	0.167051	(1)	-0.0215561	(1)	0.125521	(1)	-0.0630861	(1)	-0.188607	(1)
LOC100578528	hypothetical protein LOC100578528	18.1267	15.2302	8.19918	20.7624	11.308	15.4379	15.579	10.9661	22.189	12.3356	9.53011	13.5834	13.0505	11.3826	11.2007	16.6784	14.4882	13.373	13.2726	17.2623	11.5568	12.2165	11.2682	-0.203842	(1)	-0.318663	(1)	-0.329537	(1)	-0.114822	(1)	-0.125695	(1)	-0.0108739	(1)	-0.578888	(1)	-0.498793	(1)	-0.624041	(1)	0.0800949	(1)	-0.0451528	(1)	-0.125248	(1)
LOC725109	serine/arginine repetitive matrix protein	163.14	207.892	152.14	200.703	239.208	164.028	192.79	194.648	217.856	182.391	171.542	192.258	224.231	160.304	174.233	185.516	176.422	21.6188	193.719	2.12355	181.933	192.268	174.233	-0.0725143	(1)	0.120081	(1)	0.0624235	(1)	0.192596	(1)	0.134938	(1)	-0.0576579	(1)	-0.137745	(1)	-0.0577738	(1)	-0.199875	(1)	0.0799716	(1)	-0.0621291	(1)	-0.142101	(1)
LOC725082	hypothetical protein LOC725082	67.4714	23.6068	42.8179	64.8826	66.1085	44.384	54.5265	33.8121	31.2664	32.6013	57.1807	26.122	54.5748	32.2506	38.5801	45.5391	53.8525	55.2462	44.1693	31.9338	41.6513	43.4127	38.5813	0.241847	(1)	0.27877	(1)	-0.0440613	(1)	0.0369233	(1)	-0.285908	(1)	-0.322831	(1)	0.383277	(1)	0.443031	(1)	0.272772	(1)	0.0597539	(1)	-0.110505	(1)	-0.170259	(1)
LOC725047	hypothetical protein LOC725047	2924.43	2290.62	2160.03	2172.27	2377.3	2303.14	2132.38	2072.59	2252.19	2313.81	2160.16	2394.87	1779.61	2048.86	2333.48	267.527	2166.15	234.22	212.485	2283	2277.51	1914.24	2333.48	-0.26755	(1)	-0.156038	(1)	-0.310587	(1)	0.111512	(1)	-0.0430367	(1)	-0.154549	(1)	-0.0034718	(1)	-0.254161	(1)	0.0315496	(1)	-0.250689	(1)	0.0350214	(1)	0.285711	(1)
LOC408297	hypothetical protein LOC408297	103.725	60.1593	64.6824	70.9383	64.3688	55.9624	74.974	66.7104	78.6702	59.0348	120.715	64.7826	36.7787	65.4497	60.9815	81.9425	67.8134	6.16569	7.84223	68.8525	92.7487	51.1142	6.98149	-0.273098	(1)	-0.445664	(1)	-0.209994	(1)	-0.172566	(1)	0.0631038	(1)	0.23567	(1)	0.429817	(1)	-0.429785	(1)	-0.175138	(1)	-0.859602	(1)	-0.604955	(1)	0.254647	(1)
LOC724908	hypothetical protein LOC724908	1.00704	2.28453	1.82204	2.5953	0.869849	2.89461	1.94738	1.82768	5.04296	0	0	0	2.37282	3.79419	3.73356	1.64578	2.28671	1.88223	1.88753	2.52149		3.83521	3.73357	0.424405	(1)	0.193668	(1)	0.197725	(1)	-0.230737	(1)	-0.22668	(1)	0.00405781	(1)			0.290299	(1)	0.566281	(1)					0.275982	(1)
LOC100578228	hypothetical protein LOC100578228	0	0	0.91102	0	0	0	0	0.913841	0	0	0	0	0	0.948547	0		0.455598		0.456926			0.474273										0.0044611	(1)
LOC410216	reticulocalbin-2-like	637.454	644.237	706.04	642.77	634.12	689.881	835.425	604.963	576.915	718.11	922.832	672.903	646.593	616.555	740.49	64.8456	674.452	662.584	72.1937	647.512	797.868	631.574	74.4895	0.0736388	(1)	0.0468557	(1)	0.168408	(1)	-0.0267831	(1)	0.0947694	(1)	0.121553	(1)	0.301242	(1)	-0.0359562	(1)	0.193571	(1)	-0.337198	(1)	-0.10767	(1)	0.229527	(1)
LOC552458	DNA-directed RNA polymerase II subunit	381.667	432.537	452.777	461.964	392.302	449.629	447.897	404.832	424.617	431.747	571.807	453.478	457.954	451.508	444.294	47.1213	457.374	42.9654	426.364	428.182	512.642	454.74	444.294	0.167972	(1)	0.0483109	(1)	0.0666953	(1)	-0.119661	(1)	-0.101277	(1)	0.0183844	(1)	0.259728	(1)	0.0867881	(1)	0.0532886	(1)	-0.17294	(1)	-0.206439	(1)	-0.0334996	(1)
Cap (LOC410217)	structural maintenance of chromosomes protein 3	1297.06	1325.03	1320.07	1327.06	1202.13	1301.61	1309.61	1301.31	1103.4	1109.33	1092.79	1079.36	1194.71	1149.64	1091.44	1311.45	1323.57	1251.87	135.463	116.363	186.738	1172.18	191.444	0.0137134	(1)	-0.0666326	(1)	-0.0061584	(1)	-0.080346	(1)	-0.0198718	(1)	0.0604742	(1)	-0.0267027	(1)	0.0833644	(1)	-0.0195864	(1)	0.110067	(1)	0.00711623	(1)	-0.102951	(1)
LOC410218	probable signal peptidase complex subunit	1494.44	1461.34	1450.34	1387.62	1516.15	1622.91	1394.32	1344.26	827.046	837.942	1304.04	955.021	907.602	964.672	1016.77	1477.89	1418.98	1569.53	1369.29	832.494	1129.53	936.137	116.773	-0.0586814	(1)	0.0867925	(1)	-0.110109	(1)	0.145474	(1)	-0.0514279	(1)	-0.196902	(1)	0.44021	(1)	0.16928	(1)	0.288486	(1)	-0.270929	(1)	-0.151723	(1)	0.119206	(1)
LOC410219	hypothetical protein LOC410219	592.137	521.634	502.883	523.386	522.779	522.959	510.213	487.991	615.241	551.579	708.405	613.345	516.088	571.974	563.768	556.886	513.134	522.87	499.119	583.412	66.8749	544.375	563.768	-0.118044	(1)	-0.0909316	(1)	-0.158047	(1)	0.0271128	(1)	-0.0400025	(1)	-0.0671153	(1)	0.179867	(1)	-0.100823	(1)	-0.0494099	(1)	-0.280689	(1)	-0.229276	(1)	0.0514126	(1)
pum (LOC408298)	pumilio homolog 2	972.797	1053.93	871.846	1251.8	1113.41	870.312	936.688	1071.02	1179.04	1034.43	2060.09	1447.16	1172.17	1357.37	1448.62	113.363	161.824	991.859	13.8555	116.738	1753.63	1264.77	1448.62	0.0673926	(1)	-0.0309442	(1)	-0.0136005	(1)	-0.0983368	(1)	-0.0809931	(1)	0.0173437	(1)	0.664028	(0.821)	0.192563	(1)	0.388367	(1)	-0.471465	(1)	-0.27566	(1)	0.195804	(1)
FucT6 (LOC552522)	alpha-(1,6)-fucosyltransferase	720.031	771.409	758.879	701.597	759.378	746.809	728.319	817.888	603.138	734.851	498.743	665.589	565.917	634.578	546.344	745.721	73.2382	753.933	773.134	668.995	582.166	6.24733	546.344	-0.0302672	(1)	0.0141944	(1)	0.052027	(1)	0.0444616	(1)	0.0822942	(1)	0.0378326	(1)	-0.200565	(1)	-0.156438	(1)	-0.292184	(1)	0.0441273	(1)	-0.0916192	(1)	-0.135747	(1)
Dat #2 (LOC409361)	hypothetical protein LOC409361 (>1 isoforms)	2145.99	2494.71	1884.9	1783.84	2022.4	1674.05	2214.17	1583.69	1676.28	1767.52	3329.19	2305.01	1990.79	2307.81	1765.97	232.354	1834.37	1848.22	1898.93	1721.93	2817.96	2149.34	1765.97	-0.339059	(1)	-0.328203	(1)	-0.289158	(1)	0.0108551	(1)	0.0499005	(1)	0.0390455	(1)	0.710207	(0.630)	0.319868	(1)	0.0364626	(1)	-0.390339	(1)	-0.673744	(1)	-0.283405	(1)
Unc-76 (LOC409362)	fasciculation and elongation protein zeta-2	284.991	221.599	288.793	243.093	256.605	293.32	254.133	224.805	208.779	186.797	190.602	152.553	263.383	228.6	307.396	253.295	265.943	274.963	239.469	197.788	171.577	245.991	37.3965	0.0702985	(1)	0.118416	(1)	-0.0809827	(1)	0.0481177	(1)	-0.151281	(1)	-0.199399	(1)	-0.205093	(1)	0.314654	(1)	0.636148	(1)	0.519747	(0.912)	0.841241	(0.966)	0.321494	(1)
LOC100576945	hypothetical protein LOC100576945	97.6825	140.118	159.428	141.877	152.224	141.836	131.448	168.147	165.409	156.839	190.602	184.944	208.808	167.893	163.032	118.915	15.6526	147.296	149.797	161.124	187.773	188.353	163.321	0.341474	(1)	0.306357	(1)	0.333262	(1)	-0.0351176	(1)	-0.00821261	(1)	0.026905	(1)	0.220819	(1)	0.225248	(1)	0.0169854	(1)	0.00442871	(1)	-0.203833	(1)	-0.208262	(1)
LOC552556	arginase-1-like	118.83	134.026	135.742	115.058	107.861	125.433	111.974	139.818	101.868	106.615	135.01	94.0392	149.487	99.5974	118.229	126.428	125.419	116.647	125.896	14.2415	114.525	124.542	118.229	-0.0117765	(1)	-0.116165	(1)	-0.00608434	(1)	-0.104389	(1)	0.00569212	(1)	0.110081	(1)	0.135728	(1)	0.256708	(1)	0.18166	(1)	0.12098	(1)	0.0459318	(1)	-0.0750484	(1)
LOC724321	fumarate hydratase, mitochondrial-like	2383.66	2174.11	2241.11	2077.11	2299.01	2227.88	2172.3	2158.49	1635.94	1890.88	1667.77	1680.17	1713.17	1715.92	1729.88	2278.88	2159.18	2263.45	2165.4	1763.47	1673.97	1714.55	1729.88	-0.0778912	(1)	-0.00980535	(1)	-0.0736959	(1)	0.0680858	(1)	0.00419529	(1)	-0.0638905	(1)	-0.0750927	(1)	-0.0405374	(1)	-0.0276907	(1)	0.0345554	(1)	0.047402	(1)	0.0128466	(1)
LOC552688	acyl-CoA:lysophosphatidylglycerol	646.517	663.275	532.036	599.515	661.955	604.008	556.95	644.258	500.262	493.425	398.676	460.792	385.583	390.801	405.714	654.896	565.775	632.981	6.63872	496.844	429.734	388.192	45.7136	-0.211037	(1)	-0.0491028	(1)	-0.124852	(1)	0.161934	(1)	0.0861847	(1)	-0.0757495	(1)	-0.209347	(1)	-0.356021	(1)	-0.29233	(1)	-0.146674	(1)	-0.0829833	(1)	0.0636911	(1)
LOC414027	n-alpha-acetyltransferase 20, NatB catalytic	455.18	484.32	509.26	459.369	447.102	441.91	484.897	519.062	488.159	480.209	705.228	481.69	620.492	488.502	602.348	469.753	484.314	444.562	51.9793	484.184	593.46	554.497	62.3478	0.0440497	(1)	-0.0796906	(1)	0.0957338	(1)	-0.12374	(1)	0.0516841	(1)	0.175424	(1)	0.293594	(1)	0.195624	(1)	0.315042	(1)	-0.0979699	(1)	0.0214482	(1)	0.119418	(1)
LOC724417	uncharacterized protein CG42248-like	1155.07	1136.93	962.948	1084.84	931.608	971.623	1062.29	992.431	1135.67	1113.73	1170.62	1050.1	1163.87	879.303	1069.04	1146.24	123.892	951.616	127.363	1124.73	111.361	121.585	169.428	-0.162546	(1)	-0.268159	(1)	-0.157664	(1)	-0.105613	(1)	0.00488174	(1)	0.110495	(1)	-0.0185168	(1)	-0.138735	(1)	-0.0732248	(1)	-0.120219	(1)	-0.054708	(1)	0.0655107	(1)
LOC414026	thyroid adenoma-associated protein homolog	30.2111	29.6989	34.6187	19.8973	30.4447	31.8407	27.2633	36.5536	44.3781	38.7691	23.8253	45.9747	36.7787	39.839	54.7589	29.955	27.2584	31.1427	31.9846	41.5736	34.9874	38.3881	54.7589	-0.136114	(1)	0.0560977	(1)	0.0911429	(1)	0.192212	(1)	0.227257	(1)	0.0350452	(1)	-0.25244	(1)	-0.117991	(1)	0.397425	(1)	0.134449	(1)	0.649866	(1)	0.515417	(1)
RpL23 (LOC409294)	60S ribosomal protein L23	8844.8	7283.08	7477.65	7517.73	7119.71	8268.93	7660.98	7082.27	5905.31	6026.84	9231.5	6214.95	6725.75	6611.37	7259.29	863.939	7497.69	7694.32	7371.62	5966.73	7723.23	6668.56	7259.29	-0.105039	(1)	-0.0676909	(1)	-0.129502	(1)	0.0373479	(1)	-0.0244634	(1)	-0.0618113	(1)	0.372422	(1)	0.160594	(1)	0.283046	(1)	-0.211828	(1)	-0.0893757	(1)	0.122452	(1)
LOC726364	metaxin-2-like (>1 isoforms)	436.047	423.399	426.357	440.336	428.835	419.718	423.554	420.367	425.626	467.873	338.319	428.401	383.21	411.669	387.046	429.724	433.347	424.277	421.967	446.749	383.36	397.44	387.458	0.0121149	(1)	-0.0184015	(1)	-0.0262986	(1)	-0.0305165	(1)	-0.0384136	(1)	-0.00789707	(1)	-0.220766	(1)	-0.16873	(1)	-0.206962	(1)	0.052036	(1)	0.0138045	(1)	-0.0382315	(1)
LOC411972	hypothetical protein LOC411972	135.95	186.57	156.695	148.797	210.503	177.536	171.369	152.611	147.254	143.622	119.126	173.45	128.132	161.253	130.675	161.26	152.746	194.197	161.993	145.438	146.288	144.693	13.6746	-0.0782494	(1)	0.266815	(1)	0.00651992	(1)	0.345065	(1)	0.0847693	(1)	-0.260295	(1)	0.00840732	(1)	-0.00741629	(1)	-0.154428	(1)	-0.0158236	(1)	-0.162835	(1)	-0.147012	(1)
LOC409743	protein MON2 homolog	2330.28	2981.31	2336.77	2924.04	3020.99	2276.13	2428.38	2789.96	2319.76	2119.97	1975.91	2504.58	1950.46	1733.94	2014.88	2655.8	263.435	2648.56	269.168	2219.86	224.245	1842.2	214.878	-0.0138603	(1)	-0.00393867	(1)	-0.0255547	(1)	0.00992164	(1)	-0.0116944	(1)	-0.021616	(1)	0.0131842	(1)	-0.269042	(1)	-0.139779	(1)	-0.282227	(1)	-0.152963	(1)	0.129263	(1)
LOC551275	t-complex protein 1 subunit delta-like isoform	3140.95	3057.46	3075.6	2864.35	2989.67	3174.42	2978.51	3134.48	2998.54	3016.94	3348.25	2814.91	2725.18	2996.46	3006.76	399.238	2969.98	382.448	356.494	37.7444	381.577	286.82	36.7677	-0.0614464	(1)	-0.00800981	(1)	-0.02002	(1)	0.0534366	(1)	0.0414264	(1)	-0.0120102	(1)	0.0349868	(1)	-0.0722533	(1)	-0.000471878	(1)	-0.10724	(1)	-0.0354587	(1)	0.0717815	(1)
LOC409702	hypothetical protein LOC409702	1154.06	1630.39	1247.19	1237.09	1326.52	1235.03	1283.32	1320.5	1179.04	1220.35	846.592	1203.7	1331.15	1120.23	1023	1392.23	1242.14	128.776	131.918	1199.7	125.147	1225.69	122.996	-0.164567	(1)	-0.120377	(1)	-0.0967647	(1)	0.0441901	(1)	0.0678026	(1)	0.0236126	(1)	-0.226838	(1)	0.0309282	(1)	-0.229868	(1)	0.257766	(1)	-0.00303075	(1)	-0.260797	(1)
LOC727642	dnaJ homolog subfamily B member 13-like	67.4714	85.2891	38.2628	38.0644	97.4231	32.8055	87.632	44.7782	105.902	104.853	162.012	112.847	170.843	167.893	181.7	76.3826	38.1636	65.1144	66.2585	15.3775	137.429	169.368	181.7	-1.001	(1)	-0.230225	(1)	-0.206258	(1)	0.770776	(1)	0.794743	(1)	0.0239674	(1)	0.383124	(1)	0.684592	(1)	0.785991	(1)	0.301468	(1)	0.402866	(1)	0.101398	(1)
LOC100578854	hypothetical protein LOC100578854	118.83	266.528	142.119	204.164	231.38	157.274	181.106	222.063	289.466	185.916	174.719	200.617	214.74	158.407	171.744	192.679	173.141	194.327	21.5847	237.698	187.668	186.574	171.744	-0.154251	(1)	0.0122825	(1)	0.0651844	(1)	0.166533	(1)	0.219435	(1)	0.0529019	(1)	-0.340904	(1)	-0.349341	(1)	-0.468828	(1)	-0.0084367	(1)	-0.127924	(1)	-0.119487	(1)
LOC412976	hypothetical protein LOC412976	215.506	273.382	143.03	120.249	261.825	101.311	294.054	137.076	255.174	275.79	233.488	239.278	472.191	305.432	262.594	244.444	131.64	181.568	215.565	265.482	236.383	388.811	262.594	-0.89291	(1)	-0.428994	(1)	-0.18138	(1)	0.463916	(1)	0.71153	(1)	0.247614	(1)	-0.167488	(1)	0.550458	(1)	-0.0157798	(1)	0.717946	(1)	0.151708	(1)	-0.566238	(1)
LOC412975	e3 ubiquitin-protein ligase parkin-like isoform	428.998	399.031	441.845	382.375	406.219	419.718	427.449	376.503	406.463	431.747	371.674	456.613	429.48	452.457	466.695	414.143	412.197	412.969	41.9759	419.15	414.144	44.9683	466.696	-0.00665242	(1)	-0.003648	(1)	-0.0425716	(1)	0.00300442	(1)	-0.0359192	(1)	-0.0389236	(1)	-0.0171807	(1)	0.0733635	(1)	0.155169	(1)	0.0905442	(1)	0.172349	(1)	0.0818051	(1)
LOC100578048	hypothetical protein LOC100578048	35.2463	35.0294	48.284	27.6832	20.0065	36.665	25.3159	22.846	17.1461	10.5734	52.4156	90.9046	8.30486	15.1768	196.634	35.1379	37.9836	28.3358	24.8963	13.8597	71.6615	11.7484	196.634	0.112352	(1)	-0.310402	(1)	-0.545133	(1)	-0.422754	(1)	-0.657485	(1)	-0.234731	(1)	2.37027	(0.000)	-0.239368	(1)	3.82654	(7.274)	-2.60964	(0.000)	1.45627	(0.966)	4.06591	(4.007)
LOC552261	EF-hand domain-containing protein CG10641-like	669.679	586.362	629.515	638.445	629.771	683.127	673.792	548.305	643.482	543.649	533.686	843.218	511.342	534.032	980.682	628.289	633.98	656.449	611.485	593.565	688.452	522.687	98.682	0.013624	(1)	0.0638704	(1)	-0.0395254	(1)	0.0502464	(1)	-0.0531495	(1)	-0.103396	(1)	0.21395	(1)	-0.18346	(1)	0.724378	(0.763)	-0.39741	(0.946)	0.510428	(1)	0.907838	(0.277)
LOC727648	acylamino-acid-releasing enzyme-like	4624.31	4601.8	5580	4981.25	5069.48	5537.38	4917.13	4682.52	4033.36	3135.01	3626.21	3315.41	3305.33	3458.4	3307.93	4613.57	528.624	533.431	4799.82	3584.19	347.865	3381.87	337.935	0.194985	(1)	0.201203	(1)	0.0572584	(1)	0.00621772	(1)	-0.137727	(1)	-0.143945	(1)	-0.046375	(1)	-0.0838256	(1)	-0.115715	(1)	-0.0374507	(1)	-0.0693402	(1)	-0.0318895	(1)
LOC727650	hypothetical protein LOC727650	233.632	255.867	255.086	246.554	250.516	251.831	288.212	243.996	270.303	235.258	241.429	203.752	266.942	250.416	255.127	244.75	25.8197	251.174	266.137	252.785	222.596	258.679	255.127	0.0353425	(1)	0.0373772	(1)	0.12068	(1)	0.00203467	(1)	0.085338	(1)	0.0833033	(1)	-0.183492	(1)	0.0332787	(1)	0.0133286	(1)	0.216771	(1)	0.196821	(1)	-0.0199501	(1)
LOC727652	hypothetical protein LOC727652	61.4292	60.1593	71.0595	89.9705	93.0738	74.2949	69.1319	84.9872	86.7389	95.1606	88.9477	104.488	110.336	99.5974	78.4048	6.79424	8.51523	83.6844	77.5955	9.94978	96.7179	14.9667	78.4477	0.405323	(1)	0.461024	(1)	0.342039	(1)	0.0557002	(1)	-0.0632842	(1)	-0.118984	(1)	0.0887125	(1)	0.20679	(1)	-0.214129	(1)	0.118077	(1)	-0.302841	(1)	-0.420918	(1)
LOC100578832	hypothetical protein LOC100578832	104.732	79.9585	122.077	138.416	134.827	102.276	125.606	115.144	119.014	140.979	127.068	155.687	157.792	140.385	145.609	92.3451	13.2464	118.551	12.3749	129.996	141.378	149.886	145.689	0.496135	(1)	0.360404	(1)	0.382426	(1)	-0.135732	(1)	-0.113709	(1)	0.0220225	(1)	0.121084	(1)	0.1977	(1)	0.163628	(1)	0.0766159	(1)	0.0425439	(1)	-0.034072	(1)
LOC100578380		60.4222	51.7827	71.0595	81.3195	97.4231	72.3652	65.2371	88.6426	87.7475	106.615	160.424	115.982	107.963	105.289	90.85	56.1242	76.1895	84.8941	76.9399	97.1813	138.226	16.6259	9.84997	0.44153	(1)	0.597602	(1)	0.455668	(1)	0.156072	(1)	0.0141386	(1)	-0.141934	(1)	0.508034	(1)	0.133807	(1)	-0.0971931	(1)	-0.374227	(1)	-0.605227	(1)	-0.231	(1)
LOC100577926		166.161	194.185	148.496	205.894	280.961	189.114	152.869	177.285	108.928	128.643	87.3594	143.149	77.1165	90.112	63.4705	18.173	177.195	235.378	165.771	118.786	115.254	83.6142	63.4753	-0.0240437	(1)	0.38351	(1)	-0.126242	(1)	0.407554	(1)	-0.102199	(1)	-0.509752	(1)	-0.0435422	(1)	-0.506538	(1)	-0.9042	(1)	-0.462996	(1)	-0.860658	(1)	-0.397662	(1)
LOC409177		3777.39	4380.96	4071.35	4415.48	4748.5	4359.28	3743.83	3892.05	5288.05	5153.65	4788.88	4405.22	5434.94	4221.03	3457.28	479.179	4243.41	4553.89	3817.95	522.857	4597.48	4827.99	3457.28	0.0569457	(1)	0.158821	(1)	-0.0954842	(1)	0.101875	(1)	-0.15243	(1)	-0.254305	(1)	-0.183577	(1)	-0.112864	(1)	-0.594649	(1)	0.0707134	(1)	-0.411072	(1)	-0.481785	(1)
LOC551579	band 4.1-like protein 5-like	1007.04	954.172	1494.98	1237.09	681.092	1307.4	1275.53	1148.7	1218.38	1174.53	1159.5	343.766	1028.62	865.075	1209.67	98.6398	1366.39	994.245	1212.12	1196.45	751.631	946.845	129.674	0.478256	(1)	0.0199302	(1)	0.305784	(1)	-0.458326	(1)	-0.172472	(1)	0.285854	(1)	-0.670668	(0.951)	-0.337564	(1)	0.0158528	(1)	0.333104	(1)	0.686521	(1)	0.353417	(1)
Drl2 (LOC408278)	tyrosine-protein kinase Drl	104.732	79.9585	63.7714	89.9705	57.41	113.855	48.6844	84.0734	74.6358	63.4404	55.5923	97.1739	69.9981	90.112	98.3171	92.3451	76.8794	85.6323	66.379	69.3812	76.384	8.55238	98.3179	-0.264598	(1)	-0.108881	(1)	-0.476311	(1)	0.155716	(1)	-0.211714	(1)	-0.36743	(1)	0.14586	(1)	0.213599	(1)	0.510049	(1)	0.0677385	(1)	0.364189	(1)	0.29645	(1)
LOC100577212	hypothetical protein LOC100577212	0	0	0	0.865101	0.869849	1.92974	0.973688	0.913841	0	0.881117	0	0	2.37282	4.74273	2.48904		0.432555	1.39979	0.943765	0.445584		3.55778	2.48944							1.69427	(1)	1.12556	(1)	-0.568715	(1)			3.01357	(1)	2.49818	(1)					-0.515386	(1)
LOC100577165	hypothetical protein LOC100577165	4.02815	0.76151	1.82204	0	1.7397	3.85948	5.84213	4.56921	8.06874	3.52447	0	3.13464	13.0505	4.74273	13.6897	2.39483	0.911197	2.79959	5.25668	5.79663	1.56733	8.89661	13.6897	-1.39437	(1)	0.225292	(1)	1.12016	(1)	1.61966	(1)	2.51453	(1)	0.894869	(1)	-1.88691	(1)	0.618049	(1)	1.23981	(1)	2.50496	(1)	3.12672	(1)	0.621765	(1)
dyl (LOC408277)	hypothetical protein LOC408277	20.1407	25.1298	36.4408	24.2228	26.0955	27.0163	20.4475	18.2768	26.2234	22.909	11.1185	21.9425	40.3379	45.5303	16.1788	22.6353	3.33188	26.5559	19.3621	24.5662	16.5348	42.9347	16.1788	0.422259	(1)	0.23046	(1)	-0.225334	(1)	-0.191799	(1)	-0.647593	(1)	-0.455794	(1)	-0.571547	(1)	0.805447	(1)	-0.602575	(1)	1.37699	(0.835)	-0.031027	(1)	-1.40802	(1)
LOC410189	5'-nucleotidase domain-containing protein	452.159	577.986	522.014	525.981	483.636	520.064	523.844	398.435	407.471	405.314	282.727	426.311	408.124	383.213	360.911	515.726	523.998	51.8518	461.14	46.3925	354.519	395.669	36.9185	0.0247852	(1)	-0.037519	(1)	-0.159572	(1)	-0.0623042	(1)	-0.184358	(1)	-0.122053	(1)	-0.197011	(1)	-0.0385808	(1)	-0.171231	(1)	0.15843	(1)	0.0257799	(1)	-0.13265	(1)
P58IPK (LOC413441)	dnaJ homolog subfamily C member 3	1216.5	1178.82	1126.93	1266.51	1145.59	1300.64	1355.37	1356.14	1095.33	1304.05	1051.49	1218.33	933.703	901.12	1027.97	1197.66	1196.72	1223.12	1355.76	1199.69	1135	917.411	127.974	-0.00113131	(1)	0.0303461	(1)	0.178882	(1)	0.0314774	(1)	0.180014	(1)	0.148536	(1)	-0.0800865	(1)	-0.387023	(1)	-0.222861	(1)	-0.306937	(1)	-0.142774	(1)	0.164162	(1)
bel (LOC408276)	putative ATP-dependent RNA helicase Pl10	1681.75	2183.25	1528.69	2173.13	2110.25	1436.69	1633.85	2338.52	2110.98	1686.46	1620.12	1843.17	1538.77	1333.66	1541.96	1932.5	185.912	1773.47	1986.18	1898.73	1731.64	1436.21	1541.97	-0.0622314	(1)	-0.123892	(1)	0.0395315	(1)	-0.0616604	(1)	0.101763	(1)	0.163423	(1)	-0.132885	(1)	-0.402757	(1)	-0.300262	(1)	-0.269871	(1)	-0.167377	(1)	0.102495	(1)
RpL8 (LOC410188)	60S ribosomal protein L8	16085.4	13220.6	14323.1	14006.9	12582.4	15336.6	13527.5	12608.3	9800.49	9786.57	14385.7	11804	11125	11418.6	13229.2	14653	14165	13959.5	1367.86	9793.53	1394.86	11271.8	13229.2	-0.0488685	(1)	-0.0699491	(1)	-0.165171	(1)	-0.0210806	(1)	-0.116303	(1)	-0.0952222	(1)	0.4191	(0.975)	0.202815	(1)	0.433831	(1)	-0.216285	(1)	0.0147307	(1)	0.231016	(1)
LOC410187	esterase E4-like	268.879	274.905	182.204	211.95	302.707	222.885	166.501	224.805	248.114	273.146	227.134	250.771	271.688	285.513	172.988	271.892	197.768	262.797	195.653	26.63	238.953	278.664	172.988	-0.464275	(1)	-0.0490892	(1)	-0.474737	(1)	0.415185	(1)	-0.0104624	(1)	-0.425648	(1)	-0.125277	(1)	0.0961927	(1)	-0.591328	(1)	0.22147	(1)	-0.466051	(1)	-0.687521	(1)
LOC100577127	proline-, glutamic acid- and leucine-rich	100.704	104.327	86.5469	94.296	125.258	104.206	118.79	107.833	130.108	127.762	154.07	132.7	122.2	111.929	118.229	12.5152	9.42144	114.732	113.312	128.935	143.385	117.643	118.229	-0.181101	(1)	0.16243	(1)	0.144458	(1)	0.343532	(1)	0.325559	(1)	-0.0179726	(1)	0.153248	(1)	-0.139345	(1)	-0.125057	(1)	-0.292593	(1)	-0.278305	(1)	0.0142879	(1)
LOC408275	hypothetical protein LOC408275	3090.59	3825.82	2196.47	3193.95	2319.02	1887.28	2434.22	2503.92	3693.46	4006.44	4148.78	3855.61	3275.67	3295.25	3640.22	3458.3	2695.22	213.154	2469.73	3849.95	42.1927	3285.46	364.222	-0.359627	(1)	-0.717473	(0.879)	-0.486056	(1)	-0.357846	(1)	-0.126429	(1)	0.231417	(1)	0.0559501	(1)	-0.228744	(1)	-0.080814	(1)	-0.284694	(1)	-0.136764	(1)	0.14793	(1)
LOC100576452		72.5066	79.9585	88.3689	102.082	38.2733	79.1193	101.264	137.99	51.4382	79.3005	101.655	32.3913	49.8292	51.2215	54.7589	76.2326	95.2254	58.6964	119.627	65.3694	67.2299	5.52534	54.7589	0.320939	(1)	-0.377138	(1)	0.650061	(1)	-0.698077	(1)	0.329122	(1)	1.0272	(1)	0.0360397	(1)	-0.371607	(1)	-0.255521	(1)	-0.407647	(1)	-0.291561	(1)	0.116086	(1)
LOC724334	hypothetical protein LOC724334	3.02111	1.52302	2.73306	2.5953	0.869849	0.964869	0	0.913841	4.03437	1.76223	1.58835	3.13464	1.18641	2.84564	6.2226	2.27264	2.66418	0.917359	0.456926	2.89831	2.3615	2.16245	6.22269	0.229689	(1)	-1.30845	(1)	-2.31399	(1)	-1.53813	(1)	-2.54368	(1)	-1.00554	(1)	-0.295506	(1)	-0.523694	(1)	1.10231	(1)	-0.228188	(1)	1.39782	(1)	1.626	(1)
LOC100576423	hypothetical protein LOC100576423	1.00704	1.52302	2.73306	0	0.869849	0	0	0	4.03437	0	1.58835	3.13464	1.18641	4.74273	3.73356	1.26528	1.36653	0.434924		2.17184	2.3615	2.96457	3.73357	0.111348	(1)	-1.54033	(1)			-1.65168	(1)					0.227358	(1)	0.555481	(1)	0.888209	(1)	0.328122	(1)	0.660851	(1)	0.332729	(1)
LOC725877	beta carbonic anhydrase 1-like	90.6333	86.8121	92.013	119.384	86.9849	88.768	97.3688	92.298	60.5155	74.0138	61.9457	58.5133	67.6253	82.5236	69.6931	88.7227	15.6985	87.8764	94.8334	67.2647	6.22951	75.7443	69.6931	0.252579	(1)	-0.013827	(1)	0.0960921	(1)	-0.266406	(1)	-0.156487	(1)	0.109919	(1)	-0.159378	(1)	0.158473	(1)	0.0511674	(1)	0.317851	(1)	0.210546	(1)	-0.107305	(1)
RagA (LOC724408)	ras-related GTP-binding protein A	458.202	453.098	519.281	455.043	403.61	493.048	487.818	428.591	304.595	344.517	376.439	311.374	340.499	384.161	316.108	455.65	487.162	448.329	458.247	324.556	343.969	362.333	316.181	0.0964764	(1)	-0.023368	(1)	0.00806647	(1)	-0.119844	(1)	-0.08841	(1)	0.0314345	(1)	0.0835516	(1)	0.158839	(1)	-0.0380483	(1)	0.0752876	(1)	-0.1216	(1)	-0.196888	(1)
Pak (LOC724453)	serine/threonine-protein kinase PAK 1 (>1 isoforms)	528.694	724.957	500.15	654.016	600.196	501.732	600.766	611.36	390.325	397.384	249.371	436.76	253.891	277.924	304.907	626.826	577.84	55.9639	66.6272	393.854	343.656	265.978	34.9745	-0.119285	(1)	-0.186107	(1)	-0.0485971	(1)	-0.0668215	(1)	0.070688	(1)	0.13751	(1)	-0.199178	(1)	-0.566736	(1)	-0.369291	(1)	-0.367558	(1)	-0.170113	(1)	0.197445	(1)
MsrB (LOC724494)	methionine-R-sulfoxide reductase B1 (>1 isoforms)	564.947	530.772	536.591	487.917	588.018	592.43	537.476	479.767	766.53	678.46	589.279	562.146	703.54	690.542	655.862	547.86	512.254	59.2237	58.6213	722.495	575.712	697.411	655.862	-0.096948	(1)	0.107455	(1)	-0.107215	(1)	0.204403	(1)	-0.0102669	(1)	-0.21467	(1)	-0.32764	(1)	-0.0517438	(1)	-0.139595	(1)	0.275896	(1)	0.188045	(1)	-0.0878512	(1)
ebi (LOC410184)	F-box-like/WD repeat-containing protein ebi	1022.14	895.535	979.346	879.808	818.528	939.782	900.662	936.687	894.621	877.592	846.592	849.488	800.826	913.451	867.431	958.839	929.577	879.155	918.674	886.168	848.397	857.138	867.436	-0.0447137	(1)	-0.12517	(1)	-0.0617343	(1)	-0.0804566	(1)	-0.0170206	(1)	0.063436	(1)	-0.0633489	(1)	-0.0479529	(1)	-0.0307324	(1)	0.015396	(1)	0.0326165	(1)	0.0172205	(1)
LOC100576130	hypothetical protein LOC100576130	231.618	216.269	156.695	163.504	139.176	196.833	183.053	243.996	68.5843	55.5104	85.771	48.0645	58.134	78.7294	49.7808	223.944	16.9974	168.455	213.524	62.4732	66.9178	68.4318	49.7887	-0.484164	(1)	-0.414635	(1)	-0.0687335	(1)	0.0695293	(1)	0.415431	(1)	0.345901	(1)	0.10902	(1)	0.141296	(1)	-0.317779	(1)	0.0322758	(1)	-0.426799	(1)	-0.459075	(1)
LOC100576168	hypothetical protein LOC100576168	0	0	0	1.7302	1.7397	0	0	0.913841	0	0	3.1767	1.04488	0	0.948547	0		0.865114	0.869849	0.456926		2.11792	0.474273								0.00789609	(1)	-0.920925	(1)	-0.928821	(1)							-2.15399	(1)
LOC100576103		6.04222	3.04604	2.73306	3.4604	4.34924	5.78921	1.94738	2.74152	4.03437	4.40558	4.76506	8.35904	3.55923	14.2282	12.4452	4.54413	3.96732	5.69229	2.34446	4.21998	6.5625	8.89371	12.4452	-0.553257	(1)	0.157763	(1)	-0.954754	(1)	0.71102	(1)	-0.401497	(1)	-1.11252	(1)	0.636912	(1)	1.07555	(1)	1.56028	(1)	0.43864	(1)	0.923371	(1)	0.484732	(1)
LOC551981	DTW domain-containing protein 1-like	151.055	158.394	189.492	177.346	162.662	176.571	189.869	178.199	186.59	189.44	211.251	184.944	233.722	200.143	200.368	154.725	183.419	169.616	184.341	188.148	198.973	216.933	2.36775	0.245439	(1)	0.132572	(1)	0.25027	(1)	-0.112867	(1)	0.00483097	(1)	0.117698	(1)	0.0753628	(1)	0.206402	(1)	0.0918038	(1)	0.13104	(1)	0.0164409	(1)	-0.114599	(1)
LOC727455	protein FAM100B-like	1222.54	1021.95	979.346	911.816	1063.83	1016.97	1056.45	827.94	1048.94	939.271	843.415	936.213	1059.46	1090.83	879.876	1122.24	945.581	14.3986	942.196	994.132	889.814	175.146	879.876	-0.247113	(1)	-0.10925	(1)	-0.252287	(1)	0.137863	(1)	-0.00517439	(1)	-0.143037	(1)	-0.159892	(1)	0.113065	(1)	-0.176096	(1)	0.272957	(1)	-0.0162037	(1)	-0.289161	(1)
fab1 (LOC410183)	1-phosphatidylinositol-3-phosphate 5-kinase	1261.82	1695.12	1475.85	1692.14	1538.76	1396.17	1412.82	1611.1	1067.09	1062.63	1189.68	1161.91	1141.32	1014	1049.13	1478.47	1583.99	1467.46	1511.96	164.859	1175.79	177.667	149.135	0.0994641	(1)	-0.0107784	(1)	0.0323182	(1)	-0.110242	(1)	-0.0671458	(1)	0.0430966	(1)	0.14297	(1)	0.017241	(1)	-0.0214679	(1)	-0.125729	(1)	-0.164438	(1)	-0.0387089	(1)
Y-y (LOC408273)	yellow-y	112.788	140.118	161.25	109.003	147.004	216.131	61.3424	74.935	147.254	79.3005	57.1807	77.3212	54.5748	85.3692	161.788	126.453	135.127	181.568	68.1387	113.277	67.2591	69.9722	161.788	0.0957114	(1)	0.521906	(1)	-0.892055	(1)	0.426195	(1)	-0.987766	(1)	-1.41396	(0.661)	-0.752235	(1)	-0.695012	(1)	0.51424	(1)	0.057224	(1)	1.26648	(1)	1.20925	(1)
LOC100578965		1.00704	1.52302	4.5551	3.4604	3.4794	4.82435	0.973688	6.39689	8.06874	3.52447	3.1767	5.2244	9.49127	3.79419	3.73356	1.26528	4.77513	4.15187	3.68529	5.79663	4.2553	6.64273	3.73357	1.66362	(1)	1.71459	(1)	1.54261	(1)	0.0509684	(1)	-0.121016	(1)	-0.171984	(1)	-0.464628	(1)	0.196568	(1)	-0.634655	(1)	0.661196	(1)	-0.170027	(1)	-0.831224	(1)
LOC100578938		2.01407	3.80755	6.37714	4.32551	3.4794	1.92974	6.81582	6.39689	8.06874	11.4545	7.94176	9.40392	17.7961	12.3311	13.6897	2.91814	5.35132	2.74567	6.66353	9.76163	8.67284	15.6362	13.6897	0.878474	(1)	-0.106023	(1)	1.18243	(1)	-0.984498	(1)	0.303959	(1)	1.28846	(1)	-0.170617	(1)	0.625875	(1)	0.487899	(1)	0.796492	(1)	0.658516	(1)	-0.137975	(1)
LOC100577017	hypothetical protein LOC100577017	0	0	0	0	0.869849	1.92974	0	0	1.00859	0	3.1767	1.04488	1.18641	0.948547	0			1.39979		0.542961	2.11792	1.67478														2.06544	(1)	1.08186	(1)			-0.983579	(1)
LOC724458	hypothetical protein LOC724458	38.2674	25.1298	33.7077	26.8181	22.6161	27.0163	28.237	27.4152	28.2406	40.5314	27.002	28.2118	35.5923	23.7137	31.113	31.6987	3.26293	24.8162	27.827	34.386	27.6688	29.653	31.1135	-0.0668675	(1)	-0.353137	(1)	-0.187981	(1)	-0.286269	(1)	-0.121113	(1)	0.165156	(1)	-0.316793	(1)	-0.213644	(1)	-0.144303	(1)	0.103148	(1)	0.17249	(1)	0.0693415	(1)
LOC100578866		12.0844	1.52302	7.28816	15.5718	12.1779	7.71895	6.81582	12.7938	6.05155	3.52447	19.0602	6.26928	15.4233	21.8166	3.73356	6.83728	11.43	9.94842	9.84797	4.78813	12.6648	18.6199	3.73357	0.748426	(1)	0.548142	(1)	0.527162	(1)	-0.200285	(1)	-0.221264	(1)	-0.0209794	(1)	1.40332	(1)	1.95935	(1)	-0.358874	(1)	0.55603	(1)	-1.76219	(1)	-2.31822	(1)
LOC100578780	hypothetical protein LOC100578780	42.2955	30.4604	33.7077	37.1993	33.9241	29.9109	28.237	34.726	58.4983	48.4614	28.5903	42.8401	46.2699	55.0157	52.2698	36.378	35.4535	31.9175	31.4815	53.4799	35.7152	5.64282	52.2698	-0.037135	(1)	-0.188716	(1)	-0.208562	(1)	-0.151581	(1)	-0.171427	(1)	-0.0198461	(1)	-0.582458	(1)	-0.0786386	(1)	-0.0330175	(1)	0.503819	(1)	0.54944	(1)	0.0456211	(1)
LOC724543	cytochrome c, testis-specific-like	1.00704	2.28453	10.0212	5.19061	5.21909	5.78921	4.86844	4.56921	12.1031	11.4545	11.1185	7.31416	11.8641	13.2797	3.73356	1.64578	7.65911	5.54154	4.71882	11.7788	9.21631	12.5719	3.73357	2.20835	(1)	1.74175	(1)	1.51965	(1)	-0.4666	(1)	-0.688694	(1)	-0.222093	(1)	-0.353932	(1)	0.0940051	(1)	-1.65757	(1)	0.447938	(1)	-1.30364	(1)	-1.75158	(1)
LOC408272	monocarboxylate transporter 9-like	8710.87	8379.65	9898.23	9473.72	7419.81	7658.17	8621.04	8032.66	19903.6	16974.7	16901.7	16219.7	20677.9	17419.1	18089.1	8545.26	9685.98	7538.99	8326.85	18439.1	1656.67	1948.51	1889.2	0.180773	(1)	-0.180753	(1)	-0.0373533	(1)	-0.361526	(1)	-0.218126	(1)	0.1434	(1)	-0.15501	(1)	0.0469072	(1)	-0.0276505	(1)	0.201918	(1)	0.12736	(1)	-0.0745577	(1)
LOC410179	hypothetical protein LOC410179	3157.06	2455.11	2655.62	2625.58	2518.21	2352.35	2524.77	2375.07	2928.95	2796.66	3338.72	2359.34	3236.52	2637.91	2920.89	286.838	264.624	2435.28	2449.92	2862.88	2849.28	2937.22	292.889	-0.0876908	(1)	-0.204469	(1)	-0.195821	(1)	-0.116778	(1)	-0.10813	(1)	0.00864813	(1)	-0.00696135	(1)	0.037018	(1)	0.0289764	(1)	0.0439794	(1)	0.0359377	(1)	-0.00804162	(1)
LOC100578761		36.2533	38.837	41.9069	51.9061	37.4035	43.4191	48.6844	46.6059	57.4898	51.9859	38.1204	49.1094	69.9981	48.3759	62.226	37.5452	46.9648	4.41133	47.6452	54.7378	43.6149	59.187	62.2269	0.321161	(1)	0.106132	(1)	0.343703	(1)	-0.215028	(1)	0.0225422	(1)	0.237571	(1)	-0.327717	(1)	0.112742	(1)	0.18498	(1)	0.440459	(1)	0.512696	(1)	0.0722376	(1)
LOC100578719	hypothetical protein LOC100578719	0	1.52302	0.91102	0.865101	1.7397	1.92974	0	2.74152	0	1.76223	1.58835	0	1.18641	1.89709	0	0.761596	0.888637	1.83472	1.37762	0.881117	0.794176	1.54175		0.221796	(1)	1.26862	(1)	0.848044	(1)	1.04683	(1)	0.626248	(1)	-0.42058	(1)	-0.149875	(1)	0.807165	(1)			0.957039	(1)
LOC551942	hypothetical protein LOC551942	7.04925	6.85359	11.8433	13.8416	4.34924	5.78921	7.78951	11.8799	10.0859	4.40558	12.7068	8.35904	7.11845	10.434	6.2226	6.95143	12.8424	5.69229	9.83473	7.24575	1.53293	8.77623	6.22269	0.885539	(1)	-0.455541	(1)	0.500576	(1)	-1.34108	(1)	-0.384963	(1)	0.956118	(1)	0.539699	(1)	0.276466	(1)	-0.219618	(1)	-0.263233	(1)	-0.759317	(1)	-0.496084	(1)
LOC410178	disks large homolog 5-like	301.104	478.99	245.064	545.879	535.827	283.671	300.87	440.471	395.368	246.713	166.777	396.01	274.06	193.504	210.324	39.4672	395.472	49.7492	37.6756	321.443	281.393	233.782	21.3239	0.0199269	(1)	0.0710942	(1)	-0.0735094	(1)	0.0511673	(1)	-0.0934363	(1)	-0.144604	(1)	-0.190167	(1)	-0.457591	(1)	-0.610142	(1)	-0.267425	(1)	-0.419975	(1)	-0.152551	(1)
LOC100578644	hypothetical protein LOC100578644	0	0	0	0	0	0	0	0	0	0	0	0	0	0	0
LOC100578598		76.5348	78.4355	92.013	88.2403	78.2864	75.2598	82.7635	65.7966	112.962	98.6851	190.602	88.8148	148.301	136.591	129.43	77.4851	9.12665	76.7739	74.2836	15.8238	139.785	142.446	129.44	0.218034	(1)	-0.0133187	(1)	-0.0609449	(1)	-0.231353	(1)	-0.278979	(1)	-0.0476262	(1)	0.400757	(1)	0.428751	(1)	0.29051	(1)	0.0279939	(1)	-0.110247	(1)	-0.138241	(1)
Rapgap1 (LOC408271)	rap1 GTPase-activating protein 2	276.935	284.805	239.598	275.102	340.981	252.796	222.975	263.186	370.153	285.482	244.606	266.445	255.078	258.005	284.995	28.8698	257.352	296.888	243.844	327.818	255.525	256.541	284.995	-0.126169	(1)	0.0800183	(1)	-0.208468	(1)	0.206187	(1)	-0.0822988	(1)	-0.288486	(1)	-0.359427	(1)	-0.353702	(1)	-0.201956	(1)	0.00572452	(1)	0.157471	(1)	0.151746	(1)
LOC100578541	hypothetical protein LOC100578541	3.02111	11.4226	8.19918	12.9765	8.69849	4.82435	6.81582	10.0523	14.1203	12.3356	1.58835	11.4937	4.74563	3.79419	6.2226	7.22188	1.58785	6.76142	8.43435	13.228	6.54118	4.26991	6.22269	0.551963	(1)	-0.0950482	(1)	0.223849	(1)	-0.647012	(1)	-0.328114	(1)	0.318898	(1)	-1.016	(1)	-1.63131	(1)	-1.088	(1)	-0.615309	(1)	-0.0719975	(1)	0.543312	(1)
CytC (LOC408270)	cytochrome c	1938.55	1659.33	1719.09	1836.61	1743.18	1757.99	1571.53	1861.49	3628.91	4267.25	4765.06	4612.1	3766.85	3446.07	3620.31	1798.94	1777.85	175.584	1716.51	3948.82	4688.58	366.459	362.392	-0.0170098	(1)	-0.0393084	(1)	-0.0676635	(1)	-0.0222986	(1)	-0.0506537	(1)	-0.0283551	(1)	0.247999	(1)	-0.130569	(1)	-0.125039	(1)	-0.378568	(0.999)	-0.373038	(1)	0.00553003	(1)
LOC551820	meiotic nuclear division protein 1 homolog	25.1759	25.8913	23.6865	30.2785	23.4859	28.9461	17.5264	37.4675	22.189	14.979	25.4136	22.9874	21.3554	30.3535	31.113	25.5336	26.9825	26.216	27.4969	18.5848	24.2513	25.8544	31.1135	0.0796273	(1)	0.0380493	(1)	0.106873	(1)	-0.041578	(1)	0.0272457	(1)	0.0688237	(1)	0.380975	(1)	0.47635	(1)	0.743456	(1)	0.0953744	(1)	0.362481	(1)	0.267106	(1)
LOC408269	zinc finger HIT domain-containing protein	531.715	552.856	538.413	498.298	581.059	608.832	525.792	516.32	620.284	684.628	856.122	685.442	711.845	747.455	769.113	542.286	518.355	594.946	521.56	652.457	77.7816	729.65	769.113	-0.0651112	(1)	0.133705	(1)	-0.0576145	(1)	0.198816	(1)	0.00749673	(1)	-0.19132	(1)	0.240442	(1)	0.161324	(1)	0.237316	(1)	-0.0791176	(1)	-0.00312571	(1)	0.0759919	(1)
Ipk2 (LOC724909)	hypothetical protein LOC724909	1734.12	1350.92	1772.84	1930.04	1503.1	1574.67	1556.93	1384.47	1465.48	1643.28	1539.11	1185.94	1530.47	1299.51	1154.91	1542.52	1851.44	1538.88	147.699	1554.38	1362.53	1414.99	1154.91	0.263363	(1)	-0.00340363	(1)	-0.0687852	(1)	-0.266767	(1)	-0.332148	(1)	-0.0653816	(1)	-0.190059	(1)	-0.135553	(1)	-0.428556	(1)	0.0545059	(1)	-0.238498	(1)	-0.293003	(1)
LOC100578404	zinc finger protein 62 homolog	555.884	626.722	614.938	569.236	621.942	561.554	597.845	611.36	540.605	601.803	527.333	624.838	621.678	563.437	573.724	591.333	592.874	591.748	64.6219	571.241	576.857	592.557	573.724	0.0019119	(1)	0.00108434	(1)	0.032088	(1)	-0.000827562	(1)	0.0301761	(1)	0.0310036	(1)	0.012277	(1)	0.0529486	(1)	0.00635	(1)	0.0406716	(1)	-0.00592698	(1)	-0.0465986	(1)
LOC409460	bifunctional 3'-phosphoadenosine	1328.28	1280.1	1103.24	1099.54	1194.3	1276.52	1157.72	1239.17	1042.88	1149.86	1045.14	1232.96	1119.97	1081.34	1167.36	134.189	111.394	1235.41	1198.44	196.379	1139.47	11.6565	1167.36	-0.243823	(1)	-0.078161	(1)	-0.121993	(1)	0.165662	(1)	0.121829	(1)	-0.0438323	(1)	0.0550916	(1)	0.00562828	(1)	0.0905135	(1)	-0.0494633	(1)	0.0354219	(1)	0.0848852	(1)
LOC725049	nuclear nucleic acid-binding protein C1D-like	206.442	218.553	248.708	224.061	226.161	250.866	269.712	290.601	325.775	288.125	341.496	297.791	333.381	297.844	355.933	212.498	236.385	238.513	28.1566	36.9525	319.643	315.612	355.933	0.153689	(1)	0.166622	(1)	0.398785	(1)	0.0129328	(1)	0.245096	(1)	0.232164	(1)	0.058458	(1)	0.0401483	(1)	0.2136	(1)	-0.0183097	(1)	0.155142	(1)	0.173452	(1)
LOC551682	coiled-coil domain-containing protein 6-like	599.187	649.568	599.451	588.269	591.497	546.116	626.082	575.72	483.116	535.719	376.439	506.767	408.124	420.206	433.093	624.377	593.86	568.865	6.97667	59.4174	441.633	414.165	433.932	-0.0722954	(1)	-0.13448	(1)	-0.0552911	(1)	-0.0621844	(1)	0.0170043	(1)	0.0791887	(1)	-0.206097	(1)	-0.298641	(1)	-0.234171	(1)	-0.0925437	(1)	-0.0280737	(1)	0.06447	(1)
LOC100577285	tryptophan-rich protein-like	107.753	108.134	127.543	113.328	120.039	116.749	109.053	171.802	132.126	107.496	146.128	161.956	130.505	110.98	138.142	17.9436	12.4355	118.394	14.4276	119.819	154.424	12.7425	138.142	0.157983	(1)	0.13332	(1)	0.379549	(1)	-0.0246629	(1)	0.221566	(1)	0.246229	(1)	0.362568	(1)	0.0111736	(1)	0.20539	(1)	-0.351395	(1)	-0.157178	(1)	0.194216	(1)
LOC413758	u3 small nucleolar RNA-associated protein 14	211.478	203.323	214.09	218.871	172.23	189.114	192.79	212.925	222.899	210.587	228.723	221.515	215.926	232.394	214.057	27.4357	216.49	18.6722	22.8576	216.743	225.119	224.162	214.575	0.061816	(1)	-0.199044	(1)	-0.0319507	(1)	-0.26086	(1)	-0.0937667	(1)	0.167093	(1)	0.0547009	(1)	0.0485451	(1)	-0.0179866	(1)	-0.00615582	(1)	-0.0726875	(1)	-0.0665317	(1)
LOC100576837	s-adenosylmethionine decarboxylase	101.711	88.3351	89.2799	91.7007	98.2929	113.855	127.553	89.5564	91.7819	110.14	90.5361	94.0392	97.2855	65.4497	62.226	95.229	9.49328	16.7373	18.5548	1.96749	92.2876	81.3676	62.2269	-0.0705117	(1)	0.15872	(1)	0.192076	(1)	0.229232	(1)	0.262588	(1)	0.0333561	(1)	-0.129585	(1)	-0.311268	(1)	-0.698205	(1)	-0.181683	(1)	-0.56862	(1)	-0.386937	(1)
LOC411707	probable glutamyl-tRNA synthetase,	121.851	149.256	149.407	157.448	172.23	183.325	156.764	159.922	116.997	146.265	135.01	130.61	107.963	131.848	112.007	135.554	153.428	177.778	158.343	131.631	132.9	119.956	112.682	0.178696	(1)	0.39121	(1)	0.224189	(1)	0.212514	(1)	0.0454932	(1)	-0.16702	(1)	0.0128638	(1)	-0.134601	(1)	-0.232913	(1)	-0.147465	(1)	-0.245777	(1)	-0.0983124	(1)
Su(z)12 (LOC409170)	polycomb protein suz12-B	426.983	501.835	414.514	456.773	451.452	434.191	423.554	466.059	428.652	425.579	363.733	429.446	406.938	387.007	358.422	464.491	435.644	442.821	444.868	427.116	396.589	396.973	358.422	-0.0922478	(1)	-0.0686717	(1)	-0.0622178	(1)	0.0235761	(1)	0.03003	(1)	0.0064539	(1)	-0.106981	(1)	-0.105587	(1)	-0.252968	(1)	0.00139395	(1)	-0.145987	(1)	-0.147381	(1)
LOC727048	uncharacterized protein C16orf68 homolog	17.1196	15.2302	21.8645	17.302	26.9653	26.0515	19.4738	23.7599	23.1976	18.5035	14.2952	10.4488	20.1689	20.868	14.9342	16.175	19.5832	26.5839	21.6168	2.85537	12.372	2.51849	14.9342	0.275863	(1)	0.712692	(1)	0.418397	(1)	0.436829	(1)	0.142534	(1)	-0.294295	(1)	-0.753007	(1)	-0.0231602	(1)	-0.481461	(1)	0.729847	(1)	0.271547	(1)	-0.4583	(1)
Pdi (LOC551435)	protein disulfide-isomerase	9124.76	8197.65	8819.58	8182.13	8574.1	9312.92	8563.59	7678.09	4637.51	4896.37	6351.82	5026.92	4269.88	4458.17	4634.59	8661.24	85.8536	8943.58	812.841	4766.94	5689.37	4364.27	4634.59	-0.0269599	(1)	0.0462732	(1)	-0.0929384	(1)	0.0732331	(1)	-0.0659785	(1)	-0.139212	(1)	0.255206	(1)	-0.127402	(1)	-0.0406198	(1)	-0.382609	(1)	-0.295826	(1)	0.0867827	(1)
LOC412174	dynein intermediate chain 2, axonemal-like	124.873	146.21	121.166	116.789	136.566	139.906	112.948	149.87	101.868	102.21	127.068	103.443	106.777	118.568	118.229	135.541	118.977	138.236	131.489	12.3868	115.256	112.673	118.229	-0.188047	(1)	0.0284036	(1)	-0.0446683	(1)	0.216451	(1)	0.143379	(1)	-0.0730719	(1)	0.175721	(1)	0.14302	(1)	0.212473	(1)	-0.0327014	(1)	0.0367515	(1)	0.0694529	(1)
LOC100578386	hypothetical protein LOC100578386	235.647	263.482	356.209	422.169	294.009	270.163	315.475	248.565	203.736	207.062	171.542	184.944	174.402	187.812	123.207	249.564	389.189	282.861	282.2	25.3994	178.243	181.172	123.275	0.641059	(1)	0.176723	(1)	0.176385	(1)	-0.464335	(1)	-0.464674	(1)	-0.000338664	(1)	-0.204585	(1)	-0.181586	(1)	-0.737339	(1)	0.0229988	(1)	-0.532755	(1)	-0.555753	(1)
LOC726237	protein disulfide-isomerase TMX3-like	270.893	265.767	241.42	265.586	290.53	270.163	283.343	280.549	344.939	350.685	343.084	366.753	378.464	370.882	337.265	268.33	253.531	28.3464	281.946	347.812	354.919	374.673	337.265	-0.0820039	(1)	0.0632032	(1)	0.0714128	(1)	0.145207	(1)	0.153417	(1)	0.0082096	(1)	0.0291821	(1)	0.107326	(1)	-0.0444232	(1)	0.0781443	(1)	-0.0736054	(1)	-0.15175	(1)
LOC551586	programmed cell death protein 5-like	315.202	304.604	332.522	283.753	286.18	341.564	324.238	307.051	324.767	298.699	416.148	343.766	354.736	356.654	392.024	39.9312	38.1377	313.872	315.644	311.733	379.957	355.695	392.239	-0.00824225	(1)	0.0183588	(1)	0.026483	(1)	0.0266011	(1)	0.0347252	(1)	0.00812414	(1)	0.285527	(1)	0.190331	(1)	0.330632	(1)	-0.0951958	(1)	0.0451056	(1)	0.140301	(1)
LOC100578425	hypothetical protein LOC100578425	14.0985	22.8453	19.1314	28.5483	36.5337	25.0866	27.2633	17.363	18.1547	10.5734	42.8855	5.2244	8.30486	21.8166	19.9123	18.4719	23.8399	3.81123	22.3131	14.3643	24.5495	15.6719	19.9123	0.368044	(1)	0.738072	(1)	0.272561	(1)	0.370028	(1)	-0.0954838	(1)	-0.465512	(1)	0.743873	(1)	0.0683299	(1)	0.471201	(1)	-0.675543	(1)	-0.272672	(1)	0.402871	(1)
LOC100578466	hypothetical protein LOC100578466	21.1478	12.9457	20.9535	19.8973	17.397	15.4379	18.5001	10.9661	14.1203	10.5734	25.4136	4.17952	13.0505	12.3311	14.9342	17.4671	2.42539	16.4174	14.7339	12.3468	14.7966	12.6987	14.9342	0.26087	(1)	-0.0542644	(1)	-0.210434	(1)	-0.315134	(1)	-0.471304	(1)	-0.15617	(1)	0.261121	(1)	0.0396405	(1)	0.274481	(1)	-0.22148	(1)	0.0133606	(1)	0.234841	(1)
LOC551495	Bardet-Biedl syndrome 5 protein homolog	9.06333	19.0377	16.3984	15.5718	17.397	20.2622	17.5264	21.9322	17.1461	11.4545	17.4719	15.6732	30.8466	25.6108	18.6678	14.5534	15.9859	18.8296	19.7293	14.3293	16.5725	28.2287	18.6678	0.186102	(1)	0.422378	(1)	0.489714	(1)	0.236277	(1)	0.303612	(1)	0.0673356	(1)	0.21275	(1)	0.981118	(1)	0.384507	(1)	0.768368	(1)	0.171758	(1)	-0.59661	(1)
LOC413547	WD and tetratricopeptide repeats protein 1-like	1071.49	1088.2	1059.52	1019.09	1011.63	1108.63	1004.85	971.413	1075.16	1166.6	1180.15	1052.19	1230.31	1151.54	1263.19	179.842	139.325	16.1344	988.13	112.88	1116.17	119.927	1263.19	-0.0552046	(1)	-0.0265731	(1)	-0.128048	(1)	0.0286315	(1)	-0.0728432	(1)	-0.101475	(1)	-0.00607374	(1)	0.0874468	(1)	0.172439	(1)	0.0935205	(1)	0.178513	(1)	0.084992	(1)
LOC725286	hypothetical protein LOC725286	223.562	239.876	291.526	279.428	276.612	271.128	273.606	274.152	286.44	267.86	379.616	341.676	351.177	298.792	398.246	231.719	285.477	273.877	273.879	277.15	36.6465	324.985	398.246	0.300999	(1)	0.241116	(1)	0.241166	(1)	-0.0598828	(1)	-0.0598337	(1)	4.90904e-05	(1)	0.379917	(1)	0.229705	(1)	0.522995	(1)	-0.150212	(1)	0.143078	(1)	0.29329	(1)
LOC551421	tRNA selenocysteine 1-associated protein 1-like	748.228	729.526	734.282	707.653	652.387	762.247	729.293	659.793	739.298	713.705	806.883	663.499	758.115	793.934	725.555	738.877	72.9673	77.3166	694.543	726.514	735.199	776.243	725.555	-0.0354007	(1)	-0.0629784	(1)	-0.0892706	(1)	-0.0275777	(1)	-0.0538699	(1)	-0.0262922	(1)	0.0171534	(1)	0.0951364	(1)	-0.00188001	(1)	0.0779829	(1)	-0.0190334	(1)	-0.0970164	(1)
LOC100577870	ras-related protein Rab-35-like	435.04	421.115	420.891	399.677	410.569	427.437	410.896	487.991	368.136	418.531	395.5	370.933	342.872	374.676	343.488	428.773	41.2839	419.282	449.444	393.333	383.217	358.774	343.488	-0.0612487	(1)	-0.0309113	(1)	0.0702696	(1)	0.0303374	(1)	0.131518	(1)	0.101181	(1)	-0.0375943	(1)	-0.132677	(1)	-0.195495	(1)	-0.0950827	(1)	-0.1579	(1)	-0.0628175	(1)
ppa (LOC410175)	f-box/LRR-repeat protein 14	40.2815	82.243	37.3518	38.0644	72.1975	35.7002	48.6844	61.2274	79.6788	58.1537	33.3554	118.071	36.7787	39.839	68.4486	61.2622	37.7813	53.9488	54.9559	68.9162	75.7134	38.3881	68.4486	-0.700123	(1)	-0.183407	(1)	-0.156724	(1)	0.516716	(1)	0.543399	(1)	0.026683	(1)	0.135705	(1)	-0.847168	(1)	-0.00982292	(1)	-0.982873	(1)	-0.145528	(1)	0.837345	(1)
LOC100577904		74.5207	74.6279	97.4791	83.0497	63.499	78.1544	81.7898	106.919	83.7132	114.545	173.13	119.116	130.505	116.671	177.966	74.5743	9.26444	7.82668	94.3546	99.1292	146.123	123.589	177.966	0.275478	(1)	-0.074386	(1)	0.339414	(1)	-0.349864	(1)	0.063936	(1)	0.4138	(1)	0.559805	(1)	0.318158	(1)	0.844223	(1)	-0.241647	(1)	0.284418	(1)	0.526065	(1)
LOC727078	lipid phosphate phosphohydrolase 3-like	662.63	985.393	849.07	814.06	1004.68	841.366	891.899	981.465	514.382	609.733	320.847	525.575	526.765	424	449.272	824.117	831.565	923.267	936.682	562.574	423.22	475.383	449.272	0.0131646	(1)	0.163698	(1)	0.184894	(1)	0.150533	(1)	0.17173	(1)	0.0211964	(1)	-0.409341	(1)	-0.241628	(1)	-0.323129	(1)	0.167713	(1)	0.0862114	(1)	-0.0815015	(1)
LOC100578533	hypothetical protein LOC100578533	7.04925	10.6611	15.4873	11.2463	19.1367	12.5433	11.6843	15.5353	13.1117	14.979	17.4719	20.8976	20.1689	11.3826	14.9342	8.85519	13.3668	15.84	13.6978	14.4534	19.1847	15.7758	14.9342	0.594061	(1)	0.838975	(1)	0.620048	(1)	0.244914	(1)	0.025987	(1)	-0.218927	(1)	0.449867	(1)	0.167617	(1)	0.0885322	(1)	-0.28225	(1)	-0.361335	(1)	-0.0790848	(1)
LOC725461	leucine-rich repeat protein 1-like	13.0915	9.13812	3.64408	11.2463	4.34924	18.3325	18.5001	9.13841	10.0859	7.93005	20.6486	10.4488	8.30486	16.1253	13.6897	11.1148	7.4452	11.3488	13.8192	9.79869	15.5487	12.2158	13.6897	-0.5781	(1)	0.0290511	(1)	0.314198	(1)	0.607151	(1)	0.892297	(1)	0.285146	(1)	0.787516	(1)	0.439386	(1)	0.603817	(1)	-0.34813	(1)	-0.1837	(1)	0.16443	(1)
Dnmt1a (LOC100328599)	DNA methyltransferase 1a	63.4433	67.7744	77.4367	61.4222	77.4165	82.0139	71.0793	61.2274	99.8506	77.5383	114.361	82.5456	126.946	110.98	118.229	65.6882	69.4294	79.7153	66.1533	88.6945	98.4534	118.963	118.229	0.0816573	(1)	0.280965	(1)	0.0119233	(1)	0.199308	(1)	-0.069734	(1)	-0.269042	(1)	0.150598	(1)	0.423595	(1)	0.414673	(1)	0.272997	(1)	0.264075	(1)	-0.00892194	(1)
LOC725539	phosphoacetylglucosamine mutase-like	1269.87	1196.33	1145.15	1086.57	1209.96	1268.8	1065.22	1233.69	577.923	600.922	860.887	693.801	543.375	622.247	665.818	1233.12	1115.86	1239.38	1149.45	589.423	777.344	582.819	665.818	-0.144137	(1)	0.00732762	(1)	-0.101348	(1)	0.151465	(1)	0.0427889	(1)	-0.108676	(1)	0.39925	(1)	-0.0162743	(1)	0.175826	(1)	-0.415525	(1)	-0.223424	(1)	0.192101	(1)
LOC409486	hypothetical protein LOC409486	9154.97	7732.37	8508.92	8590.45	7091.01	8510.14	7935.56	7594.02	10000.2	8909.85	11272.5	8573.24	9681.09	9581.27	10659.3	8443.67	8549.69	78.5763	7764.79	9455.23	9922.89	9631.18	1659.32	0.018002	(1)	-0.114289	(1)	-0.120923	(1)	-0.132291	(1)	-0.138925	(1)	-0.00663381	(1)	0.0696793	(1)	0.026632	(1)	0.172962	(1)	-0.0430473	(1)	0.103283	(1)	0.14633	(1)
LOC551243		55.387	76.151	72.8816	75.2638	72.1975	65.6111	82.7635	78.5903	90.7733	83.7061	68.2991	72.0967	75.9301	93.9061	92.0945	65.769	74.7268	68.9427	8.67692	87.2397	7.19794	84.9181	92.9449	0.171534	(1)	0.0671861	(1)	0.294749	(1)	-0.104348	(1)	0.123214	(1)	0.227563	(1)	-0.313556	(1)	-0.0389121	(1)	0.0781301	(1)	0.274644	(1)	0.391686	(1)	0.117042	(1)
Plip (LOC410177)	PTEN-like phosphatase	82.577	102.804	117.522	111.598	97.4231	124.468	114.895	95.0395	141.203	127.762	187.426	127.475	192.198	172.636	170.499	92.6939	114.56	11.9456	14.9674	134.482	157.455	182.417	17.4993	0.305609	(1)	0.259361	(1)	0.179449	(1)	-0.0462484	(1)	-0.12616	(1)	-0.0799116	(1)	0.22748	(1)	0.439821	(1)	0.342348	(1)	0.212341	(1)	0.114867	(1)	-0.0974734	(1)
STXBP5 (LOC408267)	syntaxin-binding protein 5	945.607	945.795	880.045	878.078	925.519	926.274	948.372	815.146	993.463	1058.22	813.236	891.283	975.228	944.753	917.211	945.717	879.613	925.897	881.759	125.842	852.26	959.992	917.211	-0.10542	(1)	-0.0305329	(1)	-0.100999	(1)	0.0748875	(1)	0.00442126	(1)	-0.0704663	(1)	-0.267444	(1)	-0.0957175	(1)	-0.161483	(1)	0.171727	(1)	0.105961	(1)	-0.0657654	(1)
LOC409921	zinc finger protein Noc-like isoform 1	1566.95	1511.6	1655.32	1350.42	1435.25	1519.67	1587.11	1522.46	1811.43	1531.38	1628.06	1681.21	1581.48	1639.09	1859.31	1539.27	152.873	1477.46	1554.79	1671.46	1654.64	161.286	1859.31	-0.0345259	(1)	-0.05913	(1)	0.014467	(1)	-0.0246041	(1)	0.0489929	(1)	0.073597	(1)	-0.0145481	(1)	-0.0537459	(1)	0.153707	(1)	-0.0391978	(1)	0.168255	(1)	0.207453	(1)
LOC408265	zinc finger protein Noc-like	1116.8	1178.06	1110.53	1003.52	1111.67	1039.16	1053.53	1058.23	1345.46	1192.15	1410.46	1283.11	1178.1	1261.57	1426.22	1147.43	157.252	175.415	155.879	1268.87	1346.78	1219.84	1426.22	-0.118396	(1)	-0.0935113	(1)	-0.11996	(1)	0.0248844	(1)	-0.00156455	(1)	-0.0264489	(1)	0.0860473	(1)	-0.0567856	(1)	0.168725	(1)	-0.142833	(1)	0.0826773	(1)	0.22551	(1)
LOC414025	neurotrimin-like	93.6544	106.611	90.191	119.384	119.169	84.9085	110.027	88.6426	143.22	149.79	93.7128	99.2636	150.674	141.333	100.806	1.13287	14.7874	12.3888	99.3347	146.55	96.4882	146.367	1.86136	0.0655503	(1)	0.0272034	(1)	-0.0115461	(1)	-0.0383469	(1)	-0.0770964	(1)	-0.0387495	(1)	-0.602525	(1)	-0.00494503	(1)	-0.539366	(1)	0.59758	(1)	0.063159	(1)	-0.534421	(1)
LOC406144	abaecin precursor	633.426	765.317	1040.38	1658.4	681.092	458.313	1091.5	818.802	7092.42	1660.91	6463	1754.35	2700.27	2274.62	2807.64	699.372	1349.39	569.722	955.153	4376.66	418.679	2487.44	287.638	0.948178	(1)	-0.295851	(1)	0.449673	(1)	-1.24403	(1)	-0.498505	(1)	0.745524	(1)	-0.0911566	(1)	-0.815169	(1)	-0.640475	(1)	-0.724013	(1)	-0.549318	(1)	0.174695	(1)
Mir219 (LOC732498)	ame-miR-219	0	0	0	0	0	0	0	0	0	0	0	0	0	0	0
LOC100577504	hypothetical protein LOC100577504	3394.72	3479.34	3276.03	2215.52	4019.57	2259.72	3409.86	2406.14	5334.44	4630.27	4887.36	4149.22	5851.37	5461.73	5399.97	3437.29	2745.78	3139.65	298.186	4982.36	4518.29	5656.55	5399.97	-0.323948	(1)	-0.130559	(1)	-0.241134	(1)	0.193389	(1)	0.0828138	(1)	-0.110575	(1)	-0.141052	(1)	0.183094	(1)	0.116124	(1)	0.324146	(1)	0.257175	(1)	-0.0669701	(1)
LOC100577537	hypothetical protein LOC100577537	3.02111	0.76151	8.19918	3.4604	0.869849	2.89461	0.973688	4.56921	3.02578	5.2867	0	2.08976	24.9146	3.79419	2.48904	1.89139	5.8298	1.88223	2.77145	4.15624	1.44884	14.3544	2.48944	1.62406	(1)	-0.00694405	(1)	0.551254	(1)	-1.631	(1)	-1.0728	(1)	0.558198	(1)	-1.99194	(1)	1.78814	(1)	-0.739689	(1)	3.78008	(1)	1.25225	(1)	-2.52783	(1)
LOC410288	phytanoyl-CoA dioxygenase domain-containing	203.421	263.482	248.708	173.02	254.866	192.009	251.212	209.27	231.976	219.398	241.429	196.438	396.26	267.49	230.236	233.452	21.8643	223.437	23.2469	225.687	218.934	331.875	23.2362	-0.14681	(1)	-0.0632548	(1)	-0.0199826	(1)	0.0835554	(1)	0.126828	(1)	0.0432721	(1)	-0.0438315	(1)	0.556317	(1)	0.0287906	(1)	0.600149	(1)	0.0726221	(1)	-0.527526	(1)
LOC100576309	hypothetical protein LOC100576309	150.048	156.871	167.628	156.583	137.436	141.836	162.606	159.922	171.461	165.65	179.484	170.316	175.588	162.202	139.386	153.46	162.155	139.636	161.265	168.555	174.9	168.895	139.386	0.0790728	(1)	-0.13619	(1)	0.0715652	(1)	-0.215262	(1)	-0.00750754	(1)	0.207755	(1)	0.0533051	(1)	0.00290424	(1)	-0.274134	(1)	-0.0504009	(1)	-0.327439	(1)	-0.277038	(1)
LOC726780	hypothetical protein LOC726780	304.125	351.817	288.793	328.738	320.104	312.618	332.028	347.26	331.827	307.51	209.662	355.259	268.128	282.667	276.283	327.971	38.7658	316.37	339.644	319.668	282.469	275.398	276.283	-0.0870562	(1)	-0.0519976	(1)	0.0504528	(1)	0.0350586	(1)	0.137509	(1)	0.10245	(1)	-0.178525	(1)	-0.21506	(1)	-0.210426	(1)	-0.036535	(1)	-0.0319019	(1)	0.00463316	(1)
LOC408336	probable exonuclease mut-7 homolog	661.623	696.781	729.727	641.905	695.009	697.6	671.845	751.177	672.731	714.586	706.817	811.872	720.15	670.623	658.351	679.222	685.816	696.348	711.511	693.658	759.344	695.386	658.351	0.0139804	(1)	0.035878	(1)	0.0670455	(1)	0.0218976	(1)	0.0530652	(1)	0.0311675	(1)	0.130529	(1)	0.00358922	(1)	-0.075368	(1)	-0.12694	(1)	-0.205897	(1)	-0.0789572	(1)
LOC410289	paraplegin-like	990.924	994.532	1075.91	1075.32	1076.87	1079.69	1114.87	1081.07	1127.61	1202.72	1019.72	1178.63	1135.39	1072.81	1133.76	992.728	175.617	178.287	197.974	1165.17	199.174	114.997	1133.76	0.115695	(1)	0.119263	(1)	0.145373	(1)	0.00356771	(1)	0.0296784	(1)	0.0261107	(1)	-0.0841155	(1)	-0.0776642	(1)	-0.0394221	(1)	0.00645124	(1)	0.0446934	(1)	0.0382422	(1)
CTL3 (LOC410293)	low affinity immunoglobulin epsilon Fc receptor	26.1829	25.8913	18.2204	20.7624	28.705	14.473	31.158	16.4491	18.1547	31.7202	7.94176	33.4362	41.5243	32.2506	38.5801	26.3714	19.4915	21.5892	23.8358	24.9374	2.68897	36.8874	38.5813	-0.417732	(1)	-0.270273	(1)	-0.129392	(1)	0.14746	(1)	0.28834	(1)	0.140881	(1)	-0.269451	(1)	0.564817	(1)	0.629545	(1)	0.834268	(1)	0.898996	(1)	0.064728	(1)
LOC100576370	hypothetical protein LOC100576370	4.02815	4.56906	0	0.865101	9.56834	0	0	1.82768	0	4.40558	1.58835	5.2244	2.37282	5.69128	3.73356	4.29862	0.432555	4.78417	0.913841	2.22792	3.46377	4.32494	3.73357	-3.31293	(1)	0.154401	(1)	-2.23385	(1)	3.46733	(1)	1.07907	(1)	-2.38825	(1)	0.628905	(1)	0.87218	(1)	0.761219	(1)	0.243275	(1)	0.132314	(1)	-0.110961	(1)
LOC410291	dipeptidase 1-like	18.1267	18.2762	12.7543	18.1671	14.7874	20.2622	31.158	22.846	22.189	29.0769	15.8835	9.40392	22.5418	22.7651	16.1788	18.2144	15.467	17.5248	27.2286	25.6329	12.6437	22.6534	16.1788	-0.235447	(1)	-0.0546516	(1)	0.569015	(1)	0.180796	(1)	0.804462	(1)	0.623666	(1)	-1.01958	(1)	-0.178269	(1)	-0.663898	(1)	0.841309	(1)	0.35568	(1)	-0.485629	(1)
LOC410290	anaphase-promoting complex subunit 5-like	226.583	231.499	222.289	212.815	207.894	213.236	205.448	212.925	190.624	234.377	211.251	233.008	244.4	206.783	219.036	229.416	217.552	21.565	29.1866	212.556	222.13	225.592	219.356	-0.0742471	(1)	-0.121341	(1)	-0.130816	(1)	-0.0470937	(1)	-0.0565686	(1)	-0.00947488	(1)	0.0639352	(1)	0.0862475	(1)	0.0436988	(1)	0.0223123	(1)	-0.0202364	(1)	-0.0425487	(1)
LOC100577651	hypothetical protein LOC100577651	120.844	127.172	142.119	131.495	154.833	130.257	150.922	137.99	124.057	127.762	122.303	121.206	103.218	136.591	116.985	124.824	136.872	142.545	144.456	125.994	121.755	119.941	116.985	0.141708	(1)	0.200984	(1)	0.220193	(1)	0.0592752	(1)	0.0784843	(1)	0.0192091	(1)	-0.0484095	(1)	-0.0705044	(1)	-0.106064	(1)	-0.022095	(1)	-0.0576542	(1)	-0.0355592	(1)
LOC100577693	hypothetical protein LOC100577693	717.01	814.815	1118.73	1070.13	1121.24	1383.62	1046.72	1414.63	581.958	514.572	447.915	649.916	323.889	521.701	607.326	765.913	194.432	1252.43	123.675	548.265	548.915	422.795	67.3259	0.514929	(1)	0.709477	(1)	0.684193	(1)	0.194547	(1)	0.169263	(1)	-0.0252839	(1)	0.00171059	(1)	-0.374915	(1)	0.147597	(1)	-0.376625	(1)	0.145887	(1)	0.522512	(1)
LOC100577736	hypothetical protein LOC100577736	79.5559	75.3895	77.4367	85.645	87.8547	82.0139	84.7109	90.4703	25.2148	24.6713	34.9437	27.1669	26.101	17.0738	39.8246	77.4727	81.5484	84.9344	87.5958	24.9434	31.5532	21.5874	39.8246	0.0738354	(1)	0.13266	(1)	0.177088	(1)	0.0588245	(1)	0.103253	(1)	0.0444284	(1)	0.316203	(1)	-0.208447	(1)	0.675024	(1)	-0.52465	(1)	0.358821	(1)	0.883471	(1)
LOC726895	uncharacterized protein C1orf112 homolog	247.731	226.168	146.674	160.044	180.929	182.36	148.001	308.878	162.383	139.216	73.0642	110.757	94.9127	134.694	123.207	236.95	153.359	181.644	228.439	15.7999	91.9176	114.832	123.275	-0.627668	(1)	-0.383464	(1)	-0.0527687	(1)	0.244205	(1)	0.5749	(1)	0.330695	(1)	-0.71433	(1)	-0.393473	(1)	-0.291545	(1)	0.320857	(1)	0.422784	(1)	0.101928	(1)
LOC100576588	hypothetical protein LOC100576588	152.063	89.8581	104.767	172.155	120.039	115.784	152.869	103.264	100.859	107.496	85.771	80.4558	22.5418	64.5012	87.1164	12.9632	138.461	117.912	128.666	14.1777	83.1134	43.5215	87.1164	0.194948	(1)	-0.0368268	(1)	0.08236	(1)	-0.231775	(1)	-0.112588	(1)	0.119187	(1)	-0.325894	(1)	-1.25925	(0.822)	-0.258031	(1)	-0.933354	(1)	0.0678635	(1)	1.00122	(1)
LOC100576552	hypothetical protein LOC100576552	5624.3	3629.35	3816.26	4634.35	3381.97	4397.87	4037.89	4119.6	2967.28	2442.46	6804.5	3994.58	1356.06	2384.65	3424.92	4626.83	4225.34	3889.92	478.747	274.867	5399.54	187.356	3424.92	-0.130968	(1)	-0.250282	(1)	-0.181899	(1)	-0.119314	(1)	-0.0509313	(1)	0.0683823	(1)	0.997278	(0.821)	-0.532245	(1)	0.340512	(1)	-1.52952	(0.096)	-0.656766	(1)	0.872757	(1)
LOC412236	e3 ubiquitin-protein ligase LRSAM1-like	912.375	980.824	1015.79	949.016	970.751	985.131	1016.53	1003.4	914.793	990.375	800.529	842.174	892.179	901.12	798.982	946.6	982.414	977.941	19.9642	952.584	821.351	896.649	798.982	0.0535582	(1)	0.0469934	(1)	0.0934777	(1)	-0.00656475	(1)	0.0399195	(1)	0.0464842	(1)	-0.213847	(1)	-0.0873028	(1)	-0.253684	(1)	0.126544	(1)	-0.0398368	(1)	-0.166381	(1)
Pole3 (LOC726923)	DNA polymerase epsilon subunit 3	141.992	101.281	176.738	126.305	129.607	140.871	136.316	131.593	135.151	131.286	154.07	118.071	131.691	149.87	133.164	121.636	151.521	135.239	133.955	133.219	136.781	14.7887	133.164	0.316945	(1)	0.152937	(1)	0.13917	(1)	-0.164007	(1)	-0.177775	(1)	-0.0137675	(1)	0.030559	(1)	0.0796527	(1)	-0.000598175	(1)	0.0490936	(1)	-0.0311572	(1)	-0.0802509	(1)
gammaSnap (LOC409363)	hypothetical protein LOC409363	929.495	886.397	930.151	896.245	922.91	872.242	935.715	987.862	1014.64	1150.74	1197.62	1196.39	1125.9	1058.58	1072.78	97.9459	913.198	897.576	961.788	182.691	1197.27	192.24	172.776	0.00832119	(1)	-0.0165729	(1)	0.0831132	(1)	-0.024894	(1)	0.074792	(1)	0.099686	(1)	0.144805	(1)	0.012668	(1)	-0.0132724	(1)	-0.132137	(1)	-0.158077	(1)	-0.0259404	(1)
LanB2 (LOC409474)	LOW QUALITY PROTEIN: laminin subunit gamma-1	1561.91	1681.41	1587	1968.1	1827.55	1674.05	1763.35	1608.36	1521.97	1691.74	1440.64	1786.75	1539.96	1568.9	1596.72	1621.66	1777.56	175.9	1685.86	166.856	1613.69	1554.43	1596.72	0.132416	(1)	0.11054	(1)	0.0560061	(1)	-0.0218762	(1)	-0.0764102	(1)	-0.0545339	(1)	0.00612402	(1)	-0.0478566	(1)	-0.00912895	(1)	-0.0539806	(1)	-0.015253	(1)	0.0387277	(1)
LOC726955	rhythmically expressed gene 2 protein-like	181.267	172.101	184.937	157.448	176.579	158.239	155.79	163.578	163.392	171.818	155.658	155.687	198.13	154.613	161.788	176.684	171.193	167.489	159.684	167.649	155.673	176.372	161.788	-0.0455492	(1)	-0.0777939	(1)	-0.145952	(1)	-0.0322447	(1)	-0.100403	(1)	-0.068158	(1)	-0.106547	(1)	0.0735548	(1)	-0.0509628	(1)	0.180102	(1)	0.055584	(1)	-0.124518	(1)
LOC413309	hypothetical protein LOC413309	40.2815	41.883	28.2416	55.3665	61.7593	42.4542	36.0265	46.6059	35.3007	36.1258	33.3554	44.9299	36.7787	22.7651	27.3794	41.8224	41.8438	52.1675	41.3162	35.7133	39.1426	29.7719	27.3794	0.0251274	(1)	0.342955	(1)	0.00819205	(1)	0.317828	(1)	-0.0169353	(1)	-0.334763	(1)	0.132281	(1)	-0.262509	(1)	-0.383367	(1)	-0.39479	(1)	-0.515647	(1)	-0.120858	(1)
Rab21 (LOC409863)	ras-related protein Rab-21	911.368	826.999	814.452	819.251	801.131	870.312	887.03	771.282	649.533	726.04	697.287	701.115	692.862	665.88	663.329	869.184	816.851	835.721	829.157	687.787	699.263	679.371	663.329	-0.0895879	(1)	-0.0566392	(1)	-0.0680175	(1)	0.0329488	(1)	0.0215704	(1)	-0.0113784	(1)	0.023745	(1)	-0.0177615	(1)	-0.0522363	(1)	-0.0415064	(1)	-0.0759813	(1)	-0.0344749	(1)
LOC551838	rho GTPase-activating protein 1-like (>1 isoforms)	625.37	577.224	570.298	525.116	522.779	596.289	498.528	523.631	390.325	460.824	444.739	412.728	441.344	470.479	398.246	61.297	547.773	559.534	511.798	425.575	428.733	455.912	398.246	-0.134672	(1)	-0.103852	(1)	-0.234529	(1)	0.0308209	(1)	-0.0998569	(1)	-0.130678	(1)	0.0106678	(1)	0.0993418	(1)	-0.0957507	(1)	0.0886741	(1)	-0.106418	(1)	-0.195093	(1)
Mical (LOC413310)	hypothetical protein LOC413310 isoform 1	15633.2	14639.3	13192.5	16485.4	13591.4	14352.4	12931.6	12702.4	12969.5	12507.5	10818.3	13501.9	13382.7	12186.9	12171.4	15136.2	14838.9	13972	12817	12738.5	1216.15	12784.9	12171.5	-0.0286214	(1)	-0.115479	(1)	-0.239952	(1)	-0.0868572	(1)	-0.211331	(1)	-0.124473	(1)	-0.0670364	(1)	0.00523847	(1)	-0.0656961	(1)	0.0722749	(1)	0.00134033	(1)	-0.0709345	(1)
LOC413311	UPF0554 protein C2orf43 homolog	538.764	539.91	569.387	538.958	581.059	528.748	634.845	615.015	554.726	592.111	736.995	705.294	492.359	595.687	648.395	539.337	554.173	554.936	624.93	573.418	721.145	544.235	648.395	0.0391474	(1)	0.0410492	(1)	0.212506	(1)	0.00190179	(1)	0.173359	(1)	0.171457	(1)	0.330701	(1)	-0.0759186	(1)	0.177286	(1)	-0.40662	(1)	-0.153416	(1)	0.253204	(1)
LOC411939	protein RIC1 homolog	352.463	426.445	347.099	423.034	505.382	383.053	384.607	442.299	440.755	414.125	271.608	417.952	389.142	325.352	375.845	389.455	385.665	444.218	413.454	427.44	344.782	357.247	375.846	-0.0163457	(1)	0.189813	(1)	0.0862702	(1)	0.206159	(1)	0.102616	(1)	-0.103543	(1)	-0.310045	(1)	-0.258801	(1)	-0.185583	(1)	0.0512441	(1)	0.124461	(1)	0.0732172	(1)
LOC409280		467.265	530.011	556.633	527.712	499.293	507.521	533.581	559.271	475.047	502.237	441.562	477.51	571.849	531.186	492.83	498.638	542.172	53.4717	546.426	488.642	459.537	551.518	492.83	0.120759	(1)	0.0137335	(1)	0.132034	(1)	-0.107026	(1)	0.0112746	(1)	0.1183	(1)	-0.088599	(1)	0.17463	(1)	0.0123129	(1)	0.263229	(1)	0.100912	(1)	-0.162317	(1)
LOC100577250	hypothetical protein LOC100577250	19.1337	14.4687	21.8645	15.5718	21.7462	21.2271	26.2896	14.6215	19.1633	12.3356	19.0602	26.122	26.101	22.7651	17.4233	16.8119	18.7181	21.4867	2.45552	15.7494	22.5911	24.4335	17.4233	0.155874	(1)	0.354879	(1)	0.283927	(1)	0.199004	(1)	0.128053	(1)	-0.0709515	(1)	0.520455	(1)	0.633533	(1)	0.145716	(1)	0.113079	(1)	-0.374739	(1)	-0.487818	(1)
LOC550701	peptidyl-prolyl cis-trans isomerase FKBP8-like	1057.39	1024.99	1090.49	961.992	1047.3	1043.02	979.531	995.173	853.269	889.928	911.714	850.533	925.399	962.775	853.741	141.199	126.241	145.167	987.352	871.599	881.123	944.869	853.748	-0.0208633	(1)	0.00549133	(1)	-0.0765974	(1)	0.0263546	(1)	-0.0557342	(1)	-0.0820888	(1)	0.0156802	(1)	0.115256	(1)	-0.0298655	(1)	0.0995755	(1)	-0.0455458	(1)	-0.145121	(1)
LOC552033		6384.61	5748.64	6419.96	5903.45	5656.63	6754.08	6368.9	5582.66	2806.91	3357.94	4077.3	3827.4	2756.03	3486.86	3412.47	666.623	6161.73	625.355	5975.78	382.424	3952.35	3121.44	3412.47	0.0224353	(1)	0.03262	(1)	-0.0217678	(1)	0.0101847	(1)	-0.0442031	(1)	-0.0543878	(1)	0.358645	(1)	0.0181475	(1)	0.146753	(1)	-0.340497	(1)	-0.211892	(1)	0.128605	(1)
LOC724361	GPI inositol-deacylase-like	379.653	340.395	350.743	374.589	377.514	420.683	361.238	370.106	388.308	412.363	357.379	373.022	399.82	419.258	390.779	36.2376	362.666	399.986	365.672	4.33535	365.275	49.5387	39.7793	0.010548	(1)	0.148653	(1)	0.0224581	(1)	0.138105	(1)	0.0119101	(1)	-0.126195	(1)	-0.132519	(1)	0.0327907	(1)	-0.0348548	(1)	0.16531	(1)	0.0976645	(1)	-0.0676455	(1)
LOC551229	STIP1 homology and U box-containing protein	1080.55	998.339	1111.44	1029.47	921.17	1075.83	1038.93	983.293	1033.81	1019.45	1229.38	951.886	982.346	1027.28	1093.93	139.445	17.4571	998.499	111.193	126.63	19.6352	14.8112	193.933	0.0424142	(1)	-0.0579793	(1)	-0.0398739	(1)	-0.100393	(1)	-0.0822881	(1)	0.0181054	(1)	0.0872529	(1)	-0.0309913	(1)	0.0916089	(1)	-0.118244	(1)	0.00435604	(1)	0.1226	(1)
LOC727282		512.582	532.295	563.01	577.887	507.992	564.448	527.739	560.185	437.729	467.873	481.271	480.645	414.057	444.868	436.827	522.438	57.4488	536.226	543.962	452.814	48.9578	429.463	436.827	0.126837	(1)	0.0375643	(1)	0.0582446	(1)	-0.0892723	(1)	-0.068592	(1)	0.0206803	(1)	0.0870331	(1)	-0.0763451	(1)	-0.0518166	(1)	-0.163378	(1)	-0.13885	(1)	0.0245285	(1)
Fuctb (LOC724588)	glycoprotein 3-alpha-L-fucosyltransferase A	4.02815	13.7072	20.9535	12.1114	13.0477	14.473	12.6579	12.7938	16.1375	14.979	30.1787	16.7181	22.5418	20.868	23.6459	8.86766	16.5324	13.7638	12.7259	15.5582	23.4484	21.749	23.6459	0.898674	(1)	0.633895	(1)	0.521138	(1)	-0.264778	(1)	-0.377536	(1)	-0.112757	(1)	0.591811	(1)	0.480342	(1)	0.603911	(1)	-0.111468	(1)	0.0121004	(1)	0.123569	(1)
LOC551532	ribosomal L1 domain-containing protein	254.78	278.713	263.285	241.363	249.647	253.761	245.369	293.343	291.483	282.839	263.666	273.759	282.365	269.387	265.083	266.746	252.324	251.736	269.356	287.168	268.713	275.876	265.828	-0.0801915	(1)	-0.0837428	(1)	0.0140468	(1)	-0.00355132	(1)	0.0942384	(1)	0.0977897	(1)	-0.0957953	(1)	-0.0578377	(1)	-0.115416	(1)	0.0379576	(1)	-0.0196206	(1)	-0.0575782	(1)
LOC100577060	ankyrin repeat domain-containing protein	203.421	218.553	208.624	169.56	222.681	195.868	206.422	180.027	185.581	218.517	182.66	208.976	194.571	207.732	192.901	21.9874	189.917	29.2749	193.224	22.4897	195.818	21.1514	192.963	-0.158071	(1)	-0.0117572	(1)	-0.12688	(1)	0.146313	(1)	0.031191	(1)	-0.115122	(1)	-0.0451896	(1)	-0.00642346	(1)	-0.0668472	(1)	0.0387661	(1)	-0.0216576	(1)	-0.0604237	(1)
U2af50 (LOC550656)	splicing factor U2AF 50 kDa subunit	731.108	640.43	668.688	644.5	606.285	684.092	767.266	665.276	852.26	793.005	833.885	794.109	752.183	775.911	861.208	685.769	656.594	645.188	716.271	822.633	813.997	764.471	861.28	-0.0627203	(1)	-0.0880022	(1)	0.0627836	(1)	-0.0252819	(1)	0.125504	(1)	0.150786	(1)	-0.0152252	(1)	-0.106587	(1)	0.0661131	(1)	-0.0913617	(1)	0.0813383	(1)	0.1727	(1)
LOC724768	hypothetical protein LOC724768	3950.6	3570.72	3893.7	3752.81	3637.71	3872.02	3864.57	3853.67	2988.46	2784.33	5384.51	3010.3	2931.62	3258.26	3113.79	376.661	3823.25	3754.86	3859.12	2886.39	4197.47	394.937	3113.79	0.0238144	(1)	-0.00222582	(1)	0.037285	(1)	-0.0260402	(1)	0.0134706	(1)	0.0395109	(1)	0.54023	(1)	0.100642	(1)	0.109403	(1)	-0.439588	(1)	-0.430827	(1)	0.00876147	(1)
LOC724799	hypothetical protein LOC724799	553.87	699.066	574.853	690.351	675.003	631.024	612.45	708.227	621.293	561.271	546.393	700.07	601.509	511.267	545.1	626.468	632.623	653.135	66.3384	591.282	623.231	556.388	545.998	0.0140575	(1)	0.0598722	(1)	0.075965	(1)	0.0458147	(1)	0.0619074	(1)	0.0160927	(1)	0.0759214	(1)	-0.0877556	(1)	-0.117326	(1)	-0.163677	(1)	-0.193248	(1)	-0.0295706	(1)
LOC409569	hypothetical protein LOC409569 isoform 1	338.364	361.717	369.874	385.835	354.898	367.615	341.765	418.539	373.179	371.831	482.859	464.972	389.142	409.772	409.447	35.4655	377.855	361.257	38.1519	372.552	473.915	399.458	49.4471	0.110308	(1)	0.0455019	(1)	0.119054	(1)	-0.0648065	(1)	0.00874518	(1)	0.0735517	(1)	0.347369	(1)	0.10078	(1)	0.136417	(1)	-0.246589	(1)	-0.210952	(1)	0.0356366	(1)
LOC100577378	galactokinase-like	488.413	470.613	433.645	431.685	379.254	468.926	430.37	468.8	333.844	390.335	297.022	339.586	282.365	308.278	266.327	479.513	432.665	424.922	449.585	362.894	318.34	295.321	266.327	-0.148318	(1)	-0.177198	(1)	-0.0929742	(1)	-0.0288805	(1)	0.0553434	(1)	0.0842239	(1)	-0.185941	(1)	-0.29406	(1)	-0.443145	(1)	-0.108119	(1)	-0.257205	(1)	-0.149086	(1)
LOC413934	sodium-independent sulfate anion	39.2744	36.5525	30.0637	27.6832	32.1844	31.8407	26.2896	46.6059	43.3695	59.0348	36.5321	53.2889	66.4389	41.7361	38.5801	37.9134	28.8734	32.1254	36.4477	51.2215	44.915	54.8747	38.5813	-0.392966	(1)	-0.244072	(1)	-0.05688	(1)	0.148894	(1)	0.336086	(1)	0.187192	(1)	-0.189152	(1)	0.07909	(1)	-0.408346	(1)	0.268242	(1)	-0.219195	(1)	-0.487436	(1)
LOC100577406		7.04925	7.6151	4.5551	8.65101	5.21909	5.78921	5.84213	8.22457	22.189	16.7412	23.8253	15.6732	24.9146	13.2797	17.4233	7.33218	6.63544	5.54154	7.33352	19.4651	19.7492	19.9712	17.4233	-0.151108	(1)	-0.413721	(1)	-0.0600293	(1)	-0.262613	(1)	0.0910785	(1)	0.353691	(1)	0.0209058	(1)	-0.0275368	(1)	-0.159875	(1)	-0.0484426	(1)	-0.180781	(1)	-0.132338	(1)
LOC724952	sodium-independent sulfate anion	300.097	264.244	269.662	246.554	226.161	265.339	259.975	258.617	318.715	330.419	262.078	326.003	275.247	294.05	270.061	282.173	258.178	245.75	259.296	324.567	294.438	284.648	27.6884	-0.128593	(1)	-0.199376	(1)	-0.121967	(1)	-0.0707833	(1)	0.00662568	(1)	0.077409	(1)	-0.142502	(1)	-0.189337	(1)	-0.265232	(1)	-0.0468346	(1)	-0.12273	(1)	-0.075895	(1)
LOC410375	hypothetical protein LOC410375	317.216	325.165	236.865	262.126	232.25	249.901	222.975	252.22	231.976	173.58	241.429	214.2	192.198	221.011	180.455	321.195	249.495	241.754	237.597	22.7781	227.815	26.6479	18.4554	-0.364416	(1)	-0.413945	(1)	-0.43491	(1)	-0.0495288	(1)	-0.070494	(1)	-0.0209652	(1)	0.167961	(1)	0.0269717	(1)	-0.168259	(1)	-0.140989	(1)	-0.33622	(1)	-0.195231	(1)
LOC725083	clusterin-associated protein 1-like	11.0774	14.4687	10.0212	25.0879	13.9176	17.3676	8.7632	16.4491	23.1976	20.2657	28.5903	25.0771	8.30486	18.9709	13.6897	12.7734	17.5546	15.6426	12.6617	21.7317	26.8337	13.6379	13.6897	0.458745	(1)	0.292379	(1)	-0.0189723	(1)	-0.166365	(1)	-0.477717	(1)	-0.311352	(1)	0.30425	(1)	-0.672177	(1)	-0.666705	(1)	-0.976426	(1)	-0.970955	(1)	0.00547184	(1)
LOC409061	tyrosine kinase receptor Cad96Ca-like	162.133	200.277	242.331	193.783	174.84	158.239	249.264	164.491	245.088	261.692	227.134	229.874	331.008	285.513	311.13	181.249	218.569	166.54	26.8778	253.39	228.55	38.2627	311.135	0.267083	(1)	-0.121762	(1)	0.191157	(1)	-0.388844	(1)	-0.0759259	(1)	0.312918	(1)	-0.149139	(1)	0.28279	(1)	0.296159	(1)	0.431929	(1)	0.445298	(1)	0.0133688	(1)
LOC727189	geranylgeranyl pyrophosphate synthase-like	238.668	290.897	167.628	237.903	262.694	281.742	164.553	303.395	193.65	209.706	154.07	198.527	162.538	178.327	205.346	264.782	22.7652	272.219	233.974	21.6778	176.299	17.4324	25.3458	-0.384996	(1)	0.0399569	(1)	-0.178456	(1)	0.424953	(1)	0.20654	(1)	-0.218413	(1)	-0.19403	(1)	-0.242853	(1)	0.0260037	(1)	-0.0488225	(1)	0.220034	(1)	0.268856	(1)
LOC725750	hypothetical protein LOC725750	70.4925	70.0589	55.5722	58.8269	49.5814	48.2435	46.737	56.6581	44.3781	47.5803	34.9437	42.8401	56.9476	43.6332	48.5363	7.27572	57.1995	48.9124	51.6976	45.9792	38.8919	5.29379	48.5363	-0.297023	(1)	-0.522825	(1)	-0.442929	(1)	-0.225803	(1)	-0.145906	(1)	0.0798964	(1)	-0.24151	(1)	0.129302	(1)	0.0780829	(1)	0.370812	(1)	0.319593	(1)	-0.0512187	(1)
LOC100578335	hypothetical protein LOC100578335	0	1.52302	1.82204	0.865101	0	1.92974	0	1.82768	3.02578	3.52447	3.1767	5.2244	2.37282	0	2.48904	0.761596	1.34357	0.964869	0.913841	3.27512	4.2553	1.18648	2.48944	0.819138	(1)	0.341471	(1)	0.263081	(1)	-0.477667	(1)	-0.556056	(1)	-0.0783898	(1)	0.359031	(1)	-1.46495	(1)	-0.395959	(1)	-1.82398	(1)	-0.75499	(1)	1.06899	(1)
LOC100578375		4.02815	6.09208	1.82204	2.5953	3.4794	2.89461	0.973688	2.74152	13.1117	10.5734	12.7068	17.763	14.2369	21.8166	9.95616	5.61113	2.28671	3.18712	1.85766	11.8426	15.2349	18.2674	9.95616	-1.19599	(1)	-0.66697	(1)	-1.44572	(1)	0.529021	(1)	-0.249734	(1)	-0.778755	(1)	0.363399	(1)	0.606159	(1)	-0.250318	(1)	0.242759	(1)	-0.613718	(1)	-0.856477	(1)
LOC100578162	hypothetical protein LOC100578162	86.6051	70.0589	69.2375	68.343	80.8959	62.7165	84.7109	47.5197	98.842	111.021	103.243	87.77	141.183	138.488	116.985	78.3328	68.7924	71.8621	66.1153	14.9314	95.5642	139.835	116.985	-0.187398	(1)	-0.125493	(1)	-0.244617	(1)	0.0619048	(1)	-0.0572194	(1)	-0.119124	(1)	-0.135777	(1)	0.414282	(1)	0.156876	(1)	0.550058	(1)	0.292653	(1)	-0.257405	(1)
LOC725727	hypothetical protein LOC725727	32.2252	31.2219	39.1738	40.6597	20.0065	27.9812	27.2633	45.6921	62.5327	48.4614	73.0642	28.2118	52.202	67.3468	42.3137	31.7235	39.9168	23.9939	36.4777	55.4977	5.63798	59.7744	42.3137	0.331443	(1)	-0.402888	(1)	0.20146	(1)	-0.734331	(1)	-0.129983	(1)	0.604348	(1)	-0.132192	(1)	0.107116	(1)	-0.391287	(1)	0.239308	(1)	-0.259095	(1)	-0.498403	(1)
LOC725687	breast cancer type 2 susceptibility protein	214.499	196.469	257.819	255.205	237.469	223.85	209.343	213.839	263.243	261.692	317.67	250.771	279.992	316.815	273.794	25.4841	256.512	23.6592	211.599	262.467	284.228	298.435	273.794	0.319998	(1)	0.166736	(1)	0.0422508	(1)	-0.153262	(1)	-0.277747	(1)	-0.124485	(1)	0.114876	(1)	0.185128	(1)	0.0609564	(1)	0.0702522	(1)	-0.0539192	(1)	-0.124171	(1)
LOC100578089	hypothetical protein LOC100578089	46.3237	54.8287	56.4832	68.343	63.499	62.7165	59.395	57.572	68.5843	50.2237	50.8273	58.5133	35.5923	47.4273	44.8027	5.57618	62.4131	63.1773	58.4835	59.4397	54.6728	41.598	44.8273	0.303391	(1)	0.319358	(1)	0.209571	(1)	0.0159677	(1)	-0.0938195	(1)	-0.109787	(1)	-0.119802	(1)	-0.517107	(1)	-0.406973	(1)	-0.397305	(1)	-0.28717	(1)	0.110135	(1)
Cyc (LOC725614)	cycle	2844.88	3286.68	3238.68	3539.13	2680	2649.53	3802.25	2916.98	4940.08	4974.79	3618.27	3926.66	4398.02	4296.92	3704.94	365.777	3388.92	2664.77	3359.62	4957.44	3772.46	4347.47	374.937	0.144565	(1)	-0.202243	(1)	0.132044	(1)	-0.346808	(1)	-0.012521	(1)	0.334287	(1)	-0.394087	(1)	-0.189419	(1)	-0.420145	(1)	0.204668	(1)	-0.026058	(1)	-0.230726	(1)
LOC100578524	hypothetical protein LOC100578524	29.2041	15.2302	49.1951	58.8269	20.0065	32.8055	61.3424	54.8305	105.902	139.216	81.0059	25.0771	69.9981	68.2954	44.8027	22.2171	54.1967	26.4635	58.8642	122.559	53.4154	69.1467	44.8273	1.28158	(1)	0.249196	(1)	1.38653	(1)	-1.03238	(1)	0.104948	(1)	1.13733	(1)	-1.20829	(0.373)	-0.825747	(1)	-1.45182	(1)	0.382538	(1)	-0.243536	(1)	-0.626075	(1)
LOC725565	nitric oxide synthase-interacting protein	493.448	421.115	488.307	488.782	404.48	490.153	481.002	420.367	440.755	411.482	557.512	485.869	453.208	460.045	431.849	457.281	488.544	447.317	45.6845	426.118	521.695	456.627	431.849	0.0954074	(1)	-0.0317857	(1)	-0.0209642	(1)	-0.127193	(1)	-0.116372	(1)	0.0108215	(1)	0.29194	(1)	0.0997613	(1)	0.0192717	(1)	-0.192179	(1)	-0.272669	(1)	-0.0804897	(1)
LOC725580	hypothetical protein LOC725580	220.541	211.7	201.335	218.005	174.84	199.728	228.817	233.029	217.856	182.391	311.317	189.123	220.672	178.327	221.525	216.123	29.6748	187.284	23.9231	2.12355	25.2217	199.499	221.525	-0.0437115	(1)	-0.206609	(1)	0.0955779	(1)	-0.162897	(1)	0.139289	(1)	0.302187	(1)	0.322307	(1)	-0.00450668	(1)	0.146576	(1)	-0.326814	(1)	-0.175731	(1)	0.151083	(1)
LOC409885	neuropeptide Y receptor-like	8.05629	10.6611	15.4873	20.7624	13.9176	7.71895	17.5264	10.0523	35.3007	19.3846	36.5321	21.9425	37.9651	26.5593	14.9342	9.35871	18.1249	1.81827	13.7893	27.3426	29.2373	32.2622	14.9342	0.953589	(1)	0.209087	(1)	0.559169	(1)	-0.744502	(1)	-0.39442	(1)	0.350082	(1)	0.0966567	(1)	0.238691	(1)	-0.872529	(1)	0.142035	(1)	-0.969186	(1)	-1.11122	(1)
LOC100578669		12.0844	9.89962	18.2204	19.0322	19.1367	19.2974	27.2633	17.363	33.2835	31.7202	23.8253	44.9299	48.6427	31.302	47.2918	1.9924	18.6264	19.2173	22.3131	32.5187	34.3776	39.9724	47.2918	0.760884	(1)	0.805927	(1)	1.02143	(1)	0.0450434	(1)	0.260551	(1)	0.215508	(1)	0.0809446	(1)	0.298481	(1)	0.541066	(1)	0.217537	(1)	0.460122	(1)	0.242585	(1)
LOC100578695	hypothetical protein LOC100578695	1.00704	0	0.91102	0.865101	1.7397	0.964869	0	0	1.00859	0	1.58835	1.04488	0	0.948547	0	0.535182	0.888637	1.35228		0.542961	1.31662	0.474273		0.818614	(1)	1.42528	(1)			0.606668	(1)					1.38449	(1)	-0.088552	(1)			-1.47304	(1)
LOC100578739	hypothetical protein LOC100578739	8.05629	6.85359	7.28816	6.05571	7.82864	4.82435	7.78951	6.39689	8.06874	10.5734	3.1767	8.35904	11.8641	5.69128	12.4452	7.45494	6.67193	6.32649	7.93197	9.32179	5.76787	8.77768	12.4452	-0.160092	(1)	-0.236791	(1)	-0.0717604	(1)	-0.0766988	(1)	0.0883314	(1)	0.16503	(1)	-0.692456	(1)	-0.0866555	(1)	0.417022	(1)	0.605801	(1)	1.10948	(1)	0.503678	(1)
LOC552468	hypothetical protein LOC552468	9.06333	33.5064	17.3094	35.4691	33.0543	13.5082	16.5527	30.1568	39.3351	18.5035	17.4719	55.3787	35.5923	10.434	14.9342	21.2849	26.3893	23.2812	23.3547	28.9193	36.4253	23.1313	14.9342	0.310122	(1)	0.129337	(1)	0.133886	(1)	-0.180785	(1)	-0.176236	(1)	0.00454862	(1)	0.332908	(1)	-0.329574	(1)	-0.953407	(1)	-0.662482	(1)	-1.28632	(1)	-0.623833	(1)
LOC100578197	hypothetical protein LOC100578197	436.047	648.045	488.307	670.453	681.961	545.151	492.686	612.274	675.757	611.495	546.393	696.935	740.319	534.032	536.388	542.457	579.38	613.556	552.48	643.626	621.664	637.175	536.388	0.0960952	(1)	0.178781	(1)	0.0275075	(1)	0.0826859	(1)	-0.0685876	(1)	-0.151274	(1)	-0.0500871	(1)	-0.014532	(1)	-0.262945	(1)	0.0355551	(1)	-0.212858	(1)	-0.248413	(1)
LOC100578918	hypothetical protein LOC100578918	1.00704	0.76151	0	2.5953	3.4794	3.85948	2.92107	3.65536	5.04296	6.16782	0	6.26928	5.93204	0	2.48904	0.884273	1.29765	3.66944	3.28821	5.6539	3.13464	2.96629	2.48944	0.553339	(1)	2.05299	(1)	1.89474	(1)	1.49966	(1)	1.3414	(1)	-0.158254	(1)	-0.838514	(1)	-0.918286	(1)	-1.17123	(1)	-0.0797716	(1)	-0.332711	(1)	-0.252939	(1)
LOC413545	hypothetical protein LOC413545	2674.69	2488.61	2489.82	2437.85	2175.49	2536.64	2418.64	2385.13	2308.67	2282.97	2079.15	2041.7	1926.73	2209.17	2352.14	2581.65	2463.84	2356.66	241.884	2295.83	26.4245	267.946	2352.14	-0.0673879	(1)	-0.131914	(1)	-0.104128	(1)	-0.0645259	(1)	-0.0367398	(1)	0.0277861	(1)	-0.156068	(1)	-0.150811	(1)	0.0349659	(1)	0.00525721	(1)	0.191034	(1)	0.185777	(1)
LOC727447	nuclear pore complex protein Nup153-like	559.912	785.878	564.832	812.33	809.829	570.238	571.555	712.796	619.276	582.418	419.325	790.974	525.579	454.354	563.768	672.896	688.581	69.3344	642.176	6.84694	65.1497	489.966	563.768	0.0332449	(1)	0.0362847	(1)	-0.0674138	(1)	0.00303981	(1)	-0.100659	(1)	-0.103698	(1)	0.0102946	(1)	-0.294315	(1)	-0.0918968	(1)	-0.304609	(1)	-0.102191	(1)	0.202418	(1)
CTL12 (LOC411888)	hypothetical protein LOC411888	53.3729	76.9125	47.373	53.6363	66.9784	55.9624	55.5002	81.3319	116.997	128.643	66.7108	71.0519	191.012	94.8547	104.54	65.1427	5.54644	61.4738	68.4165	122.82	68.8813	142.933	14.5397	-0.367187	(1)	-0.0837121	(1)	0.0707313	(1)	0.283475	(1)	0.437919	(1)	0.154443	(1)	-0.834359	(1)	0.218797	(1)	-0.232493	(1)	1.05316	(1)	0.601866	(1)	-0.45129	(1)
LOC411889	putative serine protease K12H4.7-like	781.46	754.656	807.163	828.767	830.706	694.706	819.846	806.008	541.614	726.921	665.519	636.332	628.796	614.658	602.348	768.581	817.965	762.757	812.927	634.268	65.9258	621.727	62.3478	0.0908238	(1)	-0.0100891	(1)	0.0819098	(1)	-0.100913	(1)	-0.00891398	(1)	0.0919989	(1)	0.0374012	(1)	-0.0288097	(1)	-0.0744952	(1)	-0.066211	(1)	-0.111896	(1)	-0.0456855	(1)
LOC551795	xenotropic and polytropic retrovirus receptor 1	491.434	632.814	559.366	588.269	598.456	486.294	573.502	566.581	666.679	636.166	438.385	627.973	480.495	586.202	497.808	562.124	573.817	542.375	57.4197	651.423	533.179	533.349	497.887	0.029703	(1)	-0.0515981	(1)	0.0201794	(1)	-0.081301	(1)	-0.00952356	(1)	0.0717775	(1)	-0.288974	(1)	-0.288515	(1)	-0.388005	(1)	0.000458696	(1)	-0.0990307	(1)	-0.0994894	(1)
LOC100576157	hypothetical protein LOC100576157	240.682	219.315	285.149	226.656	264.434	259.55	259.001	200.131	395.368	257.286	306.552	289.432	276.433	376.573	304.907	229.998	255.928	261.992	229.566	326.327	297.992	326.531	34.9745	0.153973	(1)	0.187899	(1)	-0.00271282	(1)	0.0339262	(1)	-0.156686	(1)	-0.190612	(1)	-0.131046	(1)	0.000777875	(1)	-0.0979476	(1)	0.131824	(1)	0.0330983	(1)	-0.0987254	(1)
LOC100578225	hypothetical protein LOC100578225	23.1618	29.6989	20.0424	30.2785	22.6161	26.0515	23.3685	22.846	42.3609	16.7412	19.0602	20.8976	29.6602	43.6332	27.3794	26.4336	25.1648	24.3338	23.1727	29.5515	19.9789	36.6467	27.3794	-0.0710361	(1)	-0.119236	(1)	-0.193849	(1)	-0.0482	(1)	-0.122813	(1)	-0.0746126	(1)	-0.564731	(1)	0.310473	(1)	-0.110116	(1)	0.875204	(1)	0.454615	(1)	-0.420589	(1)
LOC100576189	hypothetical protein LOC100576189	0	0.76151	0	1.7302	1.7397	0	1.94738	0.913841	2.01718	3.52447	0	0	0	1.89709	0	0.387548	0.865114	0.869849	1.43689	2.77826		0.948547		1.18401	(1)	1.1919	(1)	1.9097	(1)	0.00789609	(1)	0.725689	(1)	0.717793	(1)			-1.54653	(1)
LOC725194	cytosolic	1449.13	1350.16	1410.26	1390.22	1316.08	1515.81	1283.32	1427.42	1328.32	1276.74	1372.34	1278.93	1041.67	1295.72	1075.27	1399.65	14.2379	1415.95	1355.38	132.527	1325.63	1168.7	175.265	0.000615187	(1)	0.0167087	(1)	-0.0463695	(1)	0.0160935	(1)	-0.0469847	(1)	-0.0630782	(1)	0.02537	(1)	-0.15642	(1)	-0.276621	(1)	-0.18179	(1)	-0.301991	(1)	-0.1202	(1)
LOC100576219		4.02815	3.80755	10.0212	9.51611	6.08894	7.71895	19.4738	5.48305	26.2234	25.5524	52.4156	10.4488	37.9651	30.3535	18.6678	3.91785	9.76866	6.93948	12.4785	25.8879	31.4323	34.1593	18.6678	1.3181	(1)	0.81736	(1)	1.6713	(1)	-0.50074	(1)	0.353201	(1)	0.85394	(1)	0.279966	(1)	0.4	(1)	-0.471725	(1)	0.120034	(1)	-0.751692	(1)	-0.871726	(1)
LOC725243	hypothetical protein LOC725243	5.03518	6.85359	18.2204	14.7067	15.6573	8.68382	23.3685	25.5876	55.4726	48.4614	50.8273	13.5834	41.5243	37.9419	27.3794	5.94438	16.4636	12.1755	24.4784	51.967	32.2535	39.7338	27.3794	1.46968	(1)	1.0338	(1)	2.04189	(1)	-0.435882	(1)	0.572212	(1)	1.00809	(1)	-0.690295	(1)	-0.387255	(1)	-0.924503	(1)	0.30304	(1)	-0.234207	(1)	-0.537248	(1)
LOC100576299		1.00704	0	0.91102	0.865101	0	0.964869	0	0	0	0	0	0	3.55923	0	0	0.535182	0.888637	0.482435				1.77961		0.818614	(1)	-0.0617108	(1)			-0.880325	(1)
LOC413053	serine-threonine kinase receptor-associated	980.853	815.577	801.697	799.353	920.3	886.715	874.372	790.473	1151.81	1141.93	1221.44	992.636	1204.2	1151.54	1235.81	898.215	8.52535	93.5737	832.422	1146.87	117.395	1177.87	1235.89	-0.166114	(1)	0.00847533	(1)	-0.109745	(1)	0.174589	(1)	0.0563686	(1)	-0.118221	(1)	-0.050995	(1)	0.0384789	(1)	0.107754	(1)	0.0894738	(1)	0.158749	(1)	0.0692747	(1)
LOC413054	hypothetical protein LOC413054	158.105	155.348	138.475	116.789	137.436	104.206	151.895	129.765	226.933	187.678	193.779	152.553	233.722	218.166	237.703	156.726	127.632	12.8299	14.8341	27.3557	173.166	225.944	237.734	-0.29626	(1)	-0.375377	(1)	-0.154289	(1)	-0.0791169	(1)	0.141971	(1)	0.221088	(1)	-0.259605	(1)	0.124207	(1)	0.197403	(1)	0.383812	(1)	0.457009	(1)	0.0731963	(1)
LOC100576380	hypothetical protein LOC100576380	1.00704	1.52302	0.91102	0	0	0	0	0	0	0.881117	0	0	0	0	0	1.26528	0.455598			0.445584				-1.47361	(1)
LOC410376	peptidyl-tRNA hydrolase ICT1,	347.428	365.525	408.137	385.835	404.48	470.856	422.581	371.019	392.342	407.076	462.21	420.042	441.344	440.126	424.381	356.477	396.986	437.668	396.813	399.792	441.126	44.7348	424.381	0.155283	(1)	0.296031	(1)	0.154607	(1)	0.140749	(1)	-0.000675443	(1)	-0.141424	(1)	0.142241	(1)	0.14096	(1)	0.0864107	(1)	-0.00128043	(1)	-0.05583	(1)	-0.0545496	(1)
LOC408382	clusterin-associated protein 1-like	12.0844	13.7072	13.6653	16.4369	16.5271	18.3325	8.7632	19.1907	19.1633	9.69229	17.4719	20.8976	13.0505	22.7651	17.4233	12.8958	15.5118	17.4298	13.9769	14.4278	19.1847	17.9789	17.4233	0.222968	(1)	0.434656	(1)	0.116146	(1)	0.211688	(1)	-0.106822	(1)	-0.31851	(1)	0.411111	(1)	0.311741	(1)	0.272168	(1)	-0.0993704	(1)	-0.138943	(1)	-0.0395724	(1)
LOC551988	hypothetical protein LOC551988	75.5277	41.883	33.7077	31.1436	36.5337	25.0866	34.0791	35.6398	29.2492	14.0979	30.1787	32.3913	28.4738	33.1991	24.8904	58.7538	32.4257	3.81123	34.8594	21.6735	31.285	3.83648	24.8944	-0.856356	(1)	-0.930088	(1)	-0.751943	(1)	-0.0737325	(1)	0.104413	(1)	0.178145	(1)	0.529537	(1)	0.508704	(1)	0.199656	(1)	-0.020833	(1)	-0.329881	(1)	-0.309048	(1)
LOC100577809	hypothetical protein LOC100577809	28.197	32.7449	38.2628	36.3342	61.7593	52.1029	41.8686	62.1412	31.2664	37.0069	25.4136	52.244	37.9651	34.1477	34.8466	3.47966	37.2985	56.932	52.4899	34.1366	38.8288	36.5638	34.8466	0.291684	(1)	0.901782	(1)	0.771212	(1)	0.610098	(1)	0.479529	(1)	-0.130569	(1)	0.185807	(1)	0.0789337	(1)	0.0296957	(1)	-0.106874	(1)	-0.156112	(1)	-0.049238	(1)
LOC725390	leucine-rich repeat-containing protein C10orf11	542.793	519.35	560.277	476.671	466.239	506.556	481.002	477.939	479.081	450.251	595.632	412.728	480.495	589.048	464.206	531.719	518.474	486.398	479.475	464.667	54.1799	534.772	464.263	-0.0346337	(1)	-0.126769	(1)	-0.147463	(1)	-0.0921352	(1)	-0.112829	(1)	-0.0206941	(1)	0.117744	(1)	0.202728	(1)	-0.00142885	(1)	0.0849841	(1)	-0.119173	(1)	-0.204157	(1)
btsz (LOC408337)	hypothetical protein LOC408337	19369.3	21804.3	17459.7	20489.1	17624.9	18054.6	17819.5	18654.2	16442.1	16676	13359.6	14255.3	11890.2	12217.3	11874	2586.82	18974.4	17839.8	18236.9	16559.4	1387.47	1253.73	11874	-0.117669	(1)	-0.206625	(1)	-0.174864	(1)	-0.0889565	(1)	-0.0571952	(1)	0.0317613	(1)	-0.262171	(1)	-0.458139	(1)	-0.479817	(1)	-0.195968	(1)	-0.217647	(1)	-0.0216781	(1)
LOC100577738	hypothetical protein LOC100577738	534.736	657.944	487.396	620.277	652.387	544.186	575.45	555.615	832.089	613.257	497.154	541.248	627.61	496.09	489.096	596.343	553.836	598.286	565.533	722.673	519.212	561.852	489.964	-0.106676	(1)	0.00470035	(1)	-0.0765257	(1)	0.111376	(1)	0.0301501	(1)	-0.081226	(1)	-0.477049	(1)	-0.363158	(1)	-0.563224	(1)	0.113892	(1)	-0.0861745	(1)	-0.200066	(1)
LOC100576317	hypothetical protein LOC100576317	9.06333	3.04604	10.9322	2.5953	6.95879	7.71895	4.86844	10.0523	5.04296	4.40558	12.7068	13.5834	10.6777	5.69128	8.71164	6.54683	6.76377	7.33887	7.46348	4.72427	13.1451	8.18448	8.71164	0.159776	(1)	0.277507	(1)	0.301191	(1)	0.117731	(1)	0.141415	(1)	0.0236845	(1)	1.47636	(1)	0.792798	(1)	0.882852	(1)	-0.683566	(1)	-0.593512	(1)	0.0900541	(1)
LOC410294	dnaJ homolog subfamily C member 8-like isoform	216.513	194.185	221.378	213.68	212.243	194.904	202.527	215.667	228.95	212.349	179.484	245.547	252.705	211.526	207.835	25.3489	217.529	23.5733	29.9684	22.6498	212.515	232.115	27.8349	0.0831297	(1)	-0.0125286	(1)	0.0260941	(1)	-0.0956583	(1)	-0.0570356	(1)	0.0386227	(1)	-0.0541915	(1)	0.0730842	(1)	-0.0863207	(1)	0.127276	(1)	-0.0321292	(1)	-0.159405	(1)
LOC408339	hypothetical protein LOC408339	10.0704	6.09208	14.5763	9.51611	10.4382	12.5433	3.89475	10.0523	13.1117	12.3356	11.1185	12.5386	13.0505	11.3826	13.6897	8.81225	12.4621	11.4974	6.97353	12.7237	11.8285	12.2165	13.6897	0.575935	(1)	0.507827	(1)	-0.21269	(1)	-0.0681078	(1)	-0.788624	(1)	-0.720517	(1)	-0.105246	(1)	-0.0586803	(1)	0.105579	(1)	0.0465654	(1)	0.210824	(1)	0.164259	(1)
LOC100576477		0	0	0	0	0	0	0	0	0	0.881117	0	1.04488	0	0	0					0.445584	0.522443															0.245933	(1)
LOC100576289	hypothetical protein LOC100576289	73.5137	73.1049	80.1697	115.924	86.115	77.1895	90.553	116.972	115.988	121.594	127.068	96.129	107.963	104.34	116.985	73.393	98.4664	81.6523	13.7623	118.791	111.599	16.1517	116.985	0.419472	(1)	0.155497	(1)	0.501215	(1)	-0.263975	(1)	0.0817429	(1)	0.345718	(1)	-0.0901083	(1)	-0.1623	(1)	-0.0221046	(1)	-0.0721917	(1)	0.0680037	(1)	0.140195	(1)
Pkn (LOC725923)	hypothetical protein LOC725923	1447.11	1551.96	1204.37	1367.72	1356.09	1249.51	1281.37	1429.25	1522.97	1295.24	1100.73	1286.25	1207.76	1166.71	1359.02	1499.53	1286.46	132.8	1355.32	149.181	1193.49	1187.24	1359.16	-0.221572	(1)	-0.202899	(1)	-0.145891	(1)	0.0186728	(1)	0.0756809	(1)	0.0570081	(1)	-0.239598	(1)	-0.247173	(1)	-0.0522197	(1)	-0.00757447	(1)	0.187379	(1)	0.194953	(1)
LOC410298	conserved oligomeric Golgi complex subunit	285.998	295.466	336.166	325.278	272.263	289.461	341.765	325.327	256.182	333.062	346.261	309.285	346.431	321.557	316.108	29.7324	33.7221	28.8617	333.546	294.622	327.773	333.994	316.181	0.18593	(1)	-0.0498301	(1)	0.198196	(1)	-0.23576	(1)	0.0122663	(1)	0.248026	(1)	0.153829	(1)	0.180957	(1)	0.101552	(1)	0.027128	(1)	-0.0522774	(1)	-0.0794054	(1)
LOC410297	sorting nexin-16-like	57.4011	46.4521	50.1061	37.1993	42.6226	42.4542	53.5529	53.9166	37.3179	43.1747	28.5903	27.1669	41.5243	40.7875	42.3137	51.9266	43.6527	42.5384	53.7347	4.24632	27.8786	41.1559	42.3137	-0.250402	(1)	-0.287707	(1)	0.049382	(1)	-0.0373051	(1)	0.299784	(1)	0.337089	(1)	-0.529698	(1)	0.0322426	(1)	0.0722675	(1)	0.561941	(1)	0.601966	(1)	0.040025	(1)
LOC410296	B(0,+)-type amino acid transporter 1-like	1306.13	903.15	1203.46	1071	1034.25	1401.95	1125.58	734.728	221.89	300.461	160.424	124.341	289.484	297.844	189.167	114.638	1137.23	1218.12	93.1561	261.176	142.382	293.664	189.168	0.041945	(1)	0.141061	(1)	-0.248029	(1)	0.0991165	(1)	-0.289974	(1)	-0.389091	(1)	-0.875252	(0.829)	0.169145	(1)	-0.465359	(1)	1.0444	(0.528)	0.409893	(1)	-0.634504	(1)
LOC408340	ZZ-type zinc finger-containing protein 3-like	264.851	262.721	253.263	255.205	248.777	289.461	294.054	264.1	270.303	256.405	247.783	230.919	276.433	272.233	219.036	263.786	254.234	269.119	279.77	263.354	239.357	274.334	219.356	-0.0532086	(1)	0.0288765	(1)	0.0812968	(1)	0.0820851	(1)	0.134505	(1)	0.0524203	(1)	-0.137876	(1)	0.0589258	(1)	-0.265838	(1)	0.196802	(1)	-0.127961	(1)	-0.324763	(1)
LOC410295	queuine tRNA-ribosyltransferase subunit QTRTD1	206.442	213.223	197.691	198.973	240.948	228.674	203.501	249.479	206.761	242.307	187.426	240.322	187.453	202.989	228.992	29.8326	198.332	234.811	226.49	224.534	213.874	195.228	228.992	-0.0813194	(1)	0.162262	(1)	0.110207	(1)	0.243581	(1)	0.191526	(1)	-0.0520545	(1)	-0.0701745	(1)	-0.201829	(1)	0.0283597	(1)	-0.131655	(1)	0.0985342	(1)	0.230189	(1)
LOC410299	hypothetical protein LOC410299	1337.34	1206.23	1034.92	1100.41	1054.26	1235.03	1032.11	1226.37	1090.29	1141.93	930.774	942.482	956.245	1083.24	1122.56	1271.79	167.663	1144.64	1129.24	1116.18	936.628	119.743	1122.56	-0.252401	(1)	-0.151958	(1)	-0.171503	(1)	0.100443	(1)	0.080898	(1)	-0.0195447	(1)	-0.252928	(1)	-0.130271	(1)	0.00831257	(1)	0.122657	(1)	0.261241	(1)	0.138584	(1)
LOC100578577		0	0	0	0	0	0	0	0	0	0	0	0	0	0	0
LOC412840	homeobox protein araucan-like	297.076	278.713	244.153	250.014	258.345	299.109	249.264	222.977	159.358	149.79	109.596	98.2188	72.3709	90.112	116.985	287.894	247.837	278.727	236.127	154.574	13.9752	81.2414	116.985	-0.220538	(1)	-0.0466843	(1)	-0.286014	(1)	0.173854	(1)	-0.0654754	(1)	-0.239329	(1)	-0.572995	(0.975)	-0.928007	(0.281)	-0.401973	(1)	-0.355013	(1)	0.171022	(1)	0.526035	(1)
LOC100579014		0	0	0	0	0.869849	0	0	0	0	0	0	0	0	1.89709	1.24452			0.434924				0.948547	1.24452																							0.391799	(1)
mirr (LOC412839)	homeobox protein araucan	33.2322	31.9834	54.6612	20.7624	26.0955	31.8407	21.4211	31.9844	22.189	32.6013	23.8253	20.8976	36.7787	38.8904	26.1349	32.6783	37.7118	28.9687	26.7279	27.3952	22.3614	37.8345	26.1349	0.209799	(1)	-0.170754	(1)	-0.288227	(1)	-0.380552	(1)	-0.498026	(1)	-0.117473	(1)	-0.292909	(1)	0.465782	(1)	-0.0679429	(1)	0.758691	(1)	0.224966	(1)	-0.533725	(1)
LOC100576080		0	0	1.82204	0	0	0	0	0	1.00859	0	1.58835	0	2.37282	1.89709	0		0.911197			0.542961	0.794176	2.13496														0.655188	(1)	2.08186	(1)			1.42668	(1)
LOC100576095	hypothetical protein LOC100576095	0	0	0	0	0	0	0	1.82768	0	0	0	0	0	0	3.73356				0.913841				3.73357
Y-g (LOC413379)	major royal jelly protein 1	1.00704	0.76151	3.64408	0	0.869849	0	0	0.913841	1.00859	0	0	0	3.55923	0.948547	1.24452	0.884273	1.82239	0.434924	0.456926	0.542961		2.25389	1.24452	1.04299	(1)	-1.02373	(1)	-0.952549	(1)	-2.06672	(1)	-1.99554	(1)	0.0711786	(1)			2.16007	(1)	1.30325	(1)					-0.856825	(1)
Y-g2 (LOC413380)	protein yellow	6.04222	11.4226	11.8433	5.19061	4.34924	5.78921	1.94738	10.0523	4.03437	5.2867	1.58835	2.08976	11.8641	14.2282	11.2007	8.73243	8.51693	5.69229	5.99981	4.66535	1.83956	13.4614	11.2682	-0.0360497	(1)	-0.784617	(1)	-0.541465	(1)	-0.748567	(1)	-0.505416	(1)	0.243151	(1)	-1.34153	(1)	1.48506	(1)	1.26502	(1)	2.82659	(0.852)	2.60655	(1)	-0.220037	(1)
Y-e (LOC726274)	protein yellow	13.0915	7.6151	9.1102	6.05571	6.08894	6.75408	2.92107	6.39689	5.04296	3.52447	6.35341	6.26928	15.4233	12.3311	7.46712	1.35328	7.58295	6.42151	4.65898	4.28371	6.31135	13.8773	7.46712	-0.449257	(1)	-0.689103	(1)	-1.152	(1)	-0.239846	(1)	-0.702747	(1)	-0.4629	(1)	0.559085	(1)	1.69578	(1)	0.80169	(1)	1.1367	(1)	0.242605	(1)	-0.894093	(1)
Y-e3 (LOC413894)	yellow-e3	14.0985	15.9917	11.8433	10.3812	13.0477	4.82435	10.7106	17.363	10.0859	4.40558	27.002	9.40392	23.7282	23.7137	78.4048	15.4516	11.1122	8.93639	14.3678	7.24575	18.2295	23.7292	78.4477	-0.437145	(1)	-0.751587	(1)	-0.100083	(1)	-0.314442	(1)	0.337063	(1)	0.651504	(1)	1.32896	(1)	1.71095	(1)	3.43573	(0.002)	0.381987	(1)	2.10677	(0.709)	1.72478	(1)
Mrjp3 (LOC406121)	major royal jelly protein 3 precursor	4359.46	379.993	1973.27	647.096	1825.81	5050.12	302.817	225.719	6.05155	7.93005	7.94176	5.2244	8.30486	11.3826	4.97808	2369.73	131.182	3437.97	264.268	6.99826	6.58389	9.84372	4.97887	-0.854953	(1)	0.536836	(1)	-3.16465	(1)	1.39179	(1)	-2.30969	(1)	-3.70148	(1)	-0.0866952	(1)	0.493744	(1)	-0.489868	(1)	0.580439	(1)	-0.403173	(1)	-0.983613	(1)
Mrjp1 (LOC406090)	major royal jelly protein 1	4.02815	5.33057	3.64408	4.32551	3.4794	0.964869	5.84213	10.0523	10.0859	10.5734	12.7068	9.40392	8.30486	5.69128	27.3794	4.67936	3.98479	2.22213	7.94719	1.32966	11.5537	6.9987	27.3794	-0.231806	(1)	-1.07437	(1)	0.764135	(1)	-0.84256	(1)	0.995941	(1)	1.8385	(1)	0.0979542	(1)	-0.561764	(1)	1.4063	(1)	-0.659718	(1)	1.30835	(1)	1.96806	(1)
Mrjp4 (LOC406133)	major royal jelly protein 4 precursor	6.04222	0.76151	8.19918	6.92081	1.7397	0.964869	2.92107	0.913841	11.0945	8.81117	9.53011	4.17952	5.93204	14.2282	8.71164	3.41865	7.55999	1.35228	1.91745	9.95284	6.85482	1.81226	8.71164	1.15206	(1)	-1.33093	(1)	-0.827134	(1)	-2.48299	(1)	-1.97919	(1)	0.503794	(1)	-0.53799	(1)	0.0183328	(1)	-0.192164	(1)	0.556323	(1)	0.345826	(1)	-0.210497	(1)
Mrjp6 (LOC406149)	major royal jelly protein 6	3.02111	0.76151	1.82204	2.5953	4.34924	0	1.94738	2.74152	5.04296	3.52447	11.1185	2.08976	4.74563	10.434	9.95616	1.89139	2.28671	2.17462	2.34446	4.28371	6.64112	7.58982	9.95616	0.223793	(1)	0.201379	(1)	0.309864	(1)	-0.022414	(1)	0.0860708	(1)	0.108485	(1)	0.624502	(1)	0.825204	(1)	1.21673	(1)	0.200702	(1)	0.592225	(1)	0.391523	(1)
Mrjp5 (LOC406116)	major royal jelly protein 5 precursor	0	0	0.91102	0.865101	0.869849	0	0	0	0	0.881117	0	1.04488	0	0.948547	1.24452		0.888637	0.434924		0.445584	0.522443	0.474273	1.24452							-1.02989	(1)					0.245933	(1)	0.106386	(1)	1.49818	(1)	-0.139547	(1)	1.25225	(1)	1.3918	(1)
LOC100578601		0	1.52302	0	0.865101	0.869849	1.92974	0	0	1.00859	1.76223	3.1767	1.04488	2.37282	0	1.24452	0.761596	0.432555	1.39979		1.38541	2.11792	1.18648	1.24452	-0.815994	(1)	0.87828	(1)			1.69427	(1)					0.607468	(1)	-0.223715	(1)	-0.154726	(1)	-0.831184	(1)	-0.762195	(1)	0.068989	(1)
Mrjp2 (LOC406091)	major royal jelly protein 2 precursor	3.02111	3.80755	3.64408	2.5953	5.21909	1.92974	0.973688	0.913841	4.03437	6.16782	4.76506	6.26928	7.11845	3.79419	4.97808	3.41433	3.1197	3.57442	0.943765	5.11934	5.51717	5.45632	4.97887	-0.130199	(1)	0.0661054	(1)	-1.8551	(1)	0.196304	(1)	-1.7249	(1)	-1.92121	(1)	0.113122	(1)	0.0971214	(1)	-0.0352169	(1)	-0.0160003	(1)	-0.148339	(1)	-0.132338	(1)
Mrjp7 (LOC409555)	major royal jelly protein 7	399.793	388.37	410.87	421.304	424.486	384.018	213.238	332.638	630.37	791.243	640.106	757.538	1144.88	925.782	904.766	394.817	416.874	44.2526	272.938	71.8654	698.823	135.333	94.7662	0.0783907	(1)	0.0367604	(1)	-0.529922	(1)	-0.0416303	(1)	-0.608312	(1)	-0.566682	(1)	-0.0245318	(1)	0.542566	(1)	0.348088	(1)	0.567098	(0.669)	0.37262	(1)	-0.194478	(1)
LOC100576318	hypothetical protein LOC100576318	60.4222	56.3517	64.6824	53.6363	73.0673	53.0678	35.0528	52.0889	111.954	165.65	95.3011	148.373	180.334	142.282	176.722	58.3869	59.1593	63.6755	43.5786	138.819	121.838	161.385	176.722	0.0189598	(1)	0.111252	(1)	-0.422282	(1)	0.0922921	(1)	-0.441242	(1)	-0.533534	(1)	-0.188074	(1)	0.216792	(1)	0.348454	(1)	0.404865	(1)	0.536527	(1)	0.131662	(1)
Mrjp8 (LOC406067)	major royal jelly protein 8	102.718	121.08	89.2799	121.114	144.395	88.768	100.29	85.9011	122.04	195.608	169.954	194.348	174.402	165.047	155.565	111.899	15.1974	116.581	93.9548	158.824	182.158	169.725	155.565	-0.0891014	(1)	0.0591425	(1)	-0.265412	(1)	0.148244	(1)	-0.176311	(1)	-0.324555	(1)	0.197705	(1)	0.0957685	(1)	-0.0299094	(1)	-0.101937	(1)	-0.227615	(1)	-0.125678	(1)
LOC100576353		25.1759	32.7449	16.3984	20.7624	32.1844	26.0515	9.73688	21.0183	33.2835	38.7691	19.0602	34.4811	36.7787	40.7875	32.3575	28.9641	18.5839	29.1179	15.3776	36.2634	26.7764	38.7839	32.3575	-0.640301	(1)	0.00782596	(1)	-0.91325	(1)	0.648127	(1)	-0.272949	(1)	-0.921076	(1)	-0.428401	(1)	0.106375	(1)	-0.154951	(1)	0.534776	(1)	0.27345	(1)	-0.261326	(1)
Mrjp9 (LOC409873)	major royal jelly protein 9	19.1337	43.406	1.82204	44.9853	47.8417	2.89461	13.6316	0	3.02578	6.16782	4.76506	14.6283	3.55923	16.1253	18.6678	31.2699	23.4365	25.3681	6.81582	4.5968	9.6967	9.84226	18.6678	-0.41804	(1)	-0.301755	(1)	-2.19781	(1)	0.116285	(1)	-1.77977	(1)	-1.89606	(1)	1.07686	(1)	1.09836	(1)	2.02185	(1)	0.0214973	(1)	0.944988	(1)	0.92349	(1)
Y-h (LOC724153)	yellow-h	1.00704	5.33057	1.82204	0.865101	1.7397	0.964869	0.973688	1.82768	1.00859	1.76223	0	5.2244	5.93204	1.89709	1.24452	3.16882	1.34357	1.35228	1.46854	1.38541	2.61221	3.91457	1.24452	-1.23787	(1)	-1.22854	(1)	-1.1778	(1)	0.00932577	(1)	0.0600611	(1)	0.0507354	(1)	0.91495	(1)	1.49854	(1)	-0.154726	(1)	0.583587	(1)	-1.06968	(1)	-1.65326	(1)
LOC100576406	hypothetical protein LOC100576406	1.00704	0.76151	0	0	0.869849	0	0	0	1.00859	0	0	3.13464	4.74563	0	3.73356	0.884273		0.434924		0.542961	1.56733	2.37282	3.73357			-1.02373	(1)									1.63596	(1)	2.23426	(1)	2.88821	(1)	0.5983	(1)	1.25225	(1)	0.653951	(1)
LOC412147	hypothetical protein LOC412147	2.01407	1.52302	0.91102	1.7302	0.869849	0.964869	0.973688	1.82768	2.01718	0.881117	1.58835	8.35904	2.37282	0.948547	3.73356	1.76855	1.32619	0.917359	1.46854	1.44916	4.9737	1.66682	3.73357	-0.421358	(1)	-0.947006	(1)	-0.336431	(1)	-0.525647	(1)	0.0849274	(1)	0.610575	(1)	1.77911	(1)	0.196568	(1)	1.36534	(1)	-1.58254	(1)	-0.413767	(1)	1.16878	(1)
LOC724286	hypothetical protein LOC724286	384.688	405.123	358.031	301.92	532.347	360.861	392.396	307.051	335.861	307.51	225.546	255.996	353.55	392.698	405.714	394.955	329.976	446.643	349.724	321.685	24.7784	373.125	45.7136	-0.259149	(1)	0.177489	(1)	-0.175293	(1)	0.436638	(1)	0.0838559	(1)	-0.352782	(1)	-0.41799	(1)	0.214004	(1)	0.334811	(1)	0.631995	(0.551)	0.752801	(1)	0.120806	(1)
LOC724335	hypothetical protein LOC724335	6.04222	1.52302	6.37714	11.2463	7.82864	1.92974	9.73688	2.74152	4.03437	6.16782	6.35341	3.13464	2.37282	4.74273	4.97808	3.78262	8.81173	4.87919	6.23924	5.11934	4.74425	3.55778	4.97887	1.22004	(1)	0.367256	(1)	0.721976	(1)	-0.852783	(1)	-0.498063	(1)	0.354721	(1)	-0.104695	(1)	-0.519831	(1)	-0.0352169	(1)	-0.415136	(1)	0.0694782	(1)	0.484614	(1)
LOC100576468	hypothetical protein LOC100576468	37.2603	42.6445	39.1738	38.0644	53.9306	47.2786	44.7897	58.4858	52.4468	40.5314	46.0622	47.0196	30.8466	40.7875	51.0253	39.9524	38.6191	5.64656	51.6377	46.4899	46.5491	35.8177	51.2533	-0.0489674	(1)	0.340985	(1)	0.370142	(1)	0.389952	(1)	0.41911	(1)	0.0291574	(1)	0.00160746	(1)	-0.376245	(1)	0.134322	(1)	-0.377852	(1)	0.132714	(1)	0.510566	(1)
LOC413567	l-xylulose reductase	1021.13	1141.5	1172.48	926.523	1110.8	980.307	1048.66	1028.07	763.504	754.236	980.013	630.063	1089.12	918.193	845.029	181.319	149.528	145.552	138.367	758.872	85.3822	13.6581	845.293	-0.0430861	(1)	-0.0485273	(1)	-0.0584759	(1)	-0.00544123	(1)	-0.0153898	(1)	-0.00994857	(1)	0.0852038	(1)	0.403343	(1)	0.155148	(1)	0.318139	(1)	0.0699443	(1)	-0.248195	(1)
LOC100576589		1046.31	933.611	1096.87	960.262	830.706	1043.99	973.688	920.238	838.14	823.844	1100.73	878.744	899.298	953.29	930.901	989.968	128.565	937.347	946.963	83.9922	989.736	926.294	93.9199	0.0551896	(1)	-0.0787882	(1)	-0.0640631	(1)	-0.133978	(1)	-0.119253	(1)	0.0147252	(1)	0.252209	(1)	0.156635	(1)	0.163793	(1)	-0.0955745	(1)	-0.0884161	(1)	0.00715839	(1)
LOC412108	hypothetical protein LOC412108	1622.34	1592.32	1437.59	1525.17	1471.78	1502.3	1369.98	1580.95	1268.81	1178.93	965.718	1269.53	818.622	1031.07	1037.93	167.326	1481.38	1487.43	1475.46	1223.87	1117.62	924.846	137.93	-0.11772	(1)	-0.112217	(1)	-0.123496	(1)	0.0055032	(1)	-0.00577574	(1)	-0.0112789	(1)	-0.131018	(1)	-0.404167	(1)	-0.237743	(1)	-0.273149	(1)	-0.106726	(1)	0.166424	(1)
LOC409348	lethal(2) giant larvae protein-like (>1 isoforms)	7972.71	9360.48	7637.99	10196.1	8821.14	8209.11	7586.98	8494.15	5441.35	4659.35	5155.79	6186.74	3701.59	4248.54	4059.62	8666.59	8917.35	8515.12	84.5665	55.3546	5671.26	3975.68	459.625	0.0410993	(1)	-0.0254376	(1)	-0.108168	(1)	-0.066537	(1)	-0.149267	(1)	-0.08273	(1)	0.167287	(1)	-0.345404	(1)	-0.315037	(1)	-0.512691	(0.519)	-0.482324	(1)	0.0303669	(1)
LOC411943	glutaminyl-peptide cyclotransferase-like	973.804	914.573	1250.83	1338.31	950.745	950.396	1209.32	1294	1016.66	1070.56	1014.96	1119.07	915.907	873.612	820.139	944.189	1294.58	95.5739	1251.66	143.69	167.12	894.759	82.1388	0.455327	(1)	0.00971836	(1)	0.406696	(1)	-0.445608	(1)	-0.048631	(1)	0.396977	(1)	0.031995	(1)	-0.222009	(1)	-0.347641	(1)	-0.254004	(1)	-0.379636	(1)	-0.125632	(1)
LOC551144	hypothetical protein LOC551144	460.216	433.299	350.743	333.929	433.185	358.931	367.081	422.195	619.276	505.761	314.494	455.568	574.222	709.513	553.811	446.757	342.336	396.583	394.638	562.518	385.377	641.867	553.811	-0.384079	(1)	-0.17378	(1)	-0.178963	(1)	0.2103	(1)	0.205116	(1)	-0.00518347	(1)	-0.546926	(0.896)	0.190375	(1)	-0.0225052	(1)	0.737301	(0.204)	0.524421	(1)	-0.21288	(1)
LOC100576874	hypothetical protein LOC100576874	0	3.04604	1.82204	0	0.869849	2.89461	0	0.913841	3.02578	5.2867	0	2.08976	2.37282	5.69128	4.97808	1.52319	0.911197	1.88223	0.456926	4.15624	1.44884	4.32494	4.97887	-0.74138	(1)	0.305507	(1)	-1.73692	(1)	1.04689	(1)	-0.995539	(1)	-2.04243	(1)	-1.99194	(1)	-0.0437654	(1)	0.260311	(1)	1.94818	(1)	2.25225	(1)	0.304076	(1)
LOC412375	nudC domain-containing protein 3-like	241.689	200.277	234.132	206.759	220.072	238.323	222.975	231.202	235.002	248.475	349.437	294.656	255.078	246.622	318.597	22.9829	22.4456	229.197	227.882	241.738	322.469	25.85	318.597	-0.00351192	(1)	0.0526548	(1)	0.0393182	(1)	0.0561667	(1)	0.0428302	(1)	-0.0133366	(1)	0.413824	(1)	0.0533778	(1)	0.398286	(1)	-0.360446	(1)	-0.0155372	(1)	0.344909	(1)
LOC724769	protein C10-like	56.394	59.3977	74.7036	67.4779	65.2387	64.6462	44.7897	73.1073	61.5241	64.3215	142.952	122.251	96.0991	81.575	114.496	57.8959	71.9748	64.9424	58.9485	62.9228	132.613	88.8375	114.496	0.296201	(1)	0.165701	(1)	0.0259935	(1)	-0.1305	(1)	-0.270207	(1)	-0.139707	(1)	1.07544	(0.287)	0.497578	(1)	0.86364	(1)	-0.577862	(1)	-0.2118	(1)	0.366062	(1)
lqf (LOC413680)	epsin-2	4696.82	5923.02	4391.11	5190.61	5715.78	4578.3	4745.76	5364.25	4362.16	4357.12	2920.98	4096.98	3212.79	3267.74	3243.22	539.92	479.866	5147.42	555.226	4359.64	358.978	324.269	3243.22	-0.148405	(1)	-0.044947	(1)	-0.0709783	(1)	0.103458	(1)	0.0774269	(1)	-0.0260313	(1)	-0.313159	(1)	-0.428096	(1)	-0.426783	(1)	-0.114937	(1)	-0.113624	(1)	0.00131316	(1)
Neos (LOC551309)	hypothetical protein LOC551309	353.47	352.579	351.654	323.548	345.33	373.404	321.317	328.983	340.904	334.824	260.49	283.163	319.144	315.866	301.174	353.244	337.67	359.367	325.15	337.864	271.826	317.55	31.1739	-0.0644499	(1)	0.0256908	(1)	-0.118662	(1)	0.0901407	(1)	-0.0542125	(1)	-0.144353	(1)	-0.31376	(1)	-0.0896646	(1)	-0.165847	(1)	0.224095	(1)	0.147912	(1)	-0.0761825	(1)
LOC724876	SET and MYND domain-containing protein 4-like	39.2744	41.1215	35.5298	36.3342	40.013	38.5948	38.9475	37.4675	49.421	50.2237	61.9457	49.1094	56.9476	55.0157	54.7589	4.19797	35.9326	39.3394	38.2751	49.8223	55.5276	55.9817	54.7589	-0.161853	(1)	-0.03245	(1)	-0.0732664	(1)	0.129403	(1)	0.0885868	(1)	-0.0408164	(1)	0.156411	(1)	0.168162	(1)	0.1363	(1)	0.0117505	(1)	-0.0201107	(1)	-0.0318611	(1)
LOC100578697	THUMP domain-containing protein 1-like	365.554	334.303	390.827	423.034	340.981	384.983	392.396	427.678	376.205	397.384	681.403	511.991	436.598	388.904	296.196	349.928	46.9393	362.982	41.373	386.794	596.697	412.751	296.196	0.217724	(1)	0.052837	(1)	0.228694	(1)	-0.164887	(1)	0.0109703	(1)	0.175857	(1)	0.625432	(0.593)	0.0937061	(1)	-0.385015	(1)	-0.531726	(0.845)	-1.01045	(0.414)	-0.478721	(1)
cv (LOC409124)	protein twisted gastrulation	257.801	319.073	221.378	199.838	263.564	185.255	293.08	220.236	478.073	440.558	336.731	315.554	596.763	387.007	435.582	288.437	21.6863	224.495	256.658	459.316	326.142	491.885	435.583	-0.453695	(1)	-0.362122	(1)	-0.168409	(1)	0.0915733	(1)	0.285286	(1)	0.193713	(1)	-0.493984	(1)	0.0988362	(1)	-0.0765411	(1)	0.59282	(1)	0.417443	(1)	-0.175377	(1)
LOC551609	hypothetical protein LOC551609	147.027	116.511	122.988	129.765	142.655	160.168	143.132	153.525	131.117	141.86	150.893	150.463	119.827	139.436	109.518	131.769	126.376	151.412	148.329	136.488	15.6782	129.632	19.5178	-0.0602854	(1)	0.200464	(1)	0.170786	(1)	0.26075	(1)	0.231071	(1)	-0.0296788	(1)	0.142691	(1)	-0.0743585	(1)	-0.317613	(1)	-0.21705	(1)	-0.460305	(1)	-0.243255	(1)
CTL6 (LOC413543)	sushi, von Willebrand factor type A, EGF and	378.646	357.148	501.061	468.02	314.015	348.318	366.107	345.432	722.152	652.026	711.582	579.909	596.763	638.372	515.231	367.897	484.542	331.167	355.769	687.892	645.745	617.568	515.231	0.397315	(1)	-0.151744	(1)	-0.048359	(1)	-0.549059	(1)	-0.445674	(1)	0.103385	(1)	-0.0895326	(1)	-0.1539	(1)	-0.415277	(1)	-0.0643675	(1)	-0.325745	(1)	-0.261377	(1)
LOC550973	myosin regulatory light chain sqh-like isoform	4143.95	3898.17	4104.14	3712.15	3488.96	3840.18	4042.75	4167.12	3508.89	3476.01	4793.65	3766.79	3361.09	3683.21	3759.7	421.613	398.146	3664.57	414.935	3492.45	428.223	3522.15	3759.7	-0.0410919	(1)	-0.133932	(1)	0.029783	(1)	-0.09284	(1)	0.0708749	(1)	0.163715	(1)	0.293446	(1)	0.0122177	(1)	0.106377	(1)	-0.281228	(1)	-0.187069	(1)	0.094159	(1)
LOC409956	hypothetical protein LOC409956 isoform 1	2607.22	2888.41	2703.91	2857.43	2766.99	2182.53	3047.64	3034.87	3146.81	2751.73	2944.8	2544.28	2566.2	2468.12	2367.08	2747.81	278.668	2474.76	341.255	2949.27	2744.54	2517.16	2367.77	0.0171482	(1)	-0.150994	(1)	0.146384	(1)	-0.168142	(1)	0.129236	(1)	0.297378	(1)	-0.10379	(1)	-0.22856	(1)	-0.31725	(1)	-0.12477	(1)	-0.21346	(1)	-0.0886901	(1)
LOC100577771	hypothetical protein LOC100577771	262.837	229.214	231.399	229.252	200.065	231.569	242.448	224.805	346.956	289.887	490.801	291.522	435.412	353.808	411.936	246.254	23.3254	215.817	233.627	318.422	391.161	394.699	411.936	-0.0951341	(1)	-0.189	(1)	-0.0746026	(1)	-0.0938656	(1)	0.0205315	(1)	0.114397	(1)	0.296825	(1)	0.309489	(1)	0.371483	(1)	0.012664	(1)	0.0746576	(1)	0.0619936	(1)
LOC409534	hypothetical protein LOC409534	1142.99	1021.18	917.397	898.84	929.868	1027.59	1006.79	912.927	954.128	900.501	980.013	998.906	889.806	975.106	1026.73	182.854	98.1185	978.727	959.865	927.315	989.459	932.456	126.729	-0.252862	(1)	-0.144836	(1)	-0.172918	(1)	0.108026	(1)	0.0799444	(1)	-0.0280817	(1)	0.0935813	(1)	0.00797679	(1)	0.146925	(1)	-0.0856045	(1)	0.0533432	(1)	0.138948	(1)
LOC100302106	hypothetical protein LOC100302106	1146.01	1278.57	1443.97	1398.87	1511.8	1373.01	1238.53	1497.79	1707.55	1569.27	1761.48	1801.37	2040.62	1839.23	1774.69	1212.29	1421.42	1442.43	1368.16	1638.48	1781.43	1939.93	1774.69	0.229594	(1)	0.250738	(1)	0.174499	(1)	0.0211441	(1)	-0.0550947	(1)	-0.0762388	(1)	0.12074	(1)	0.243708	(1)	0.115269	(1)	0.122968	(1)	-0.00547062	(1)	-0.128439	(1)
LOC551486	serine/threonine-protein phosphatase 6	1976.81	2046.18	1963.25	2159.29	1904.1	1922.98	2136.27	2006.8	1780.17	1958.72	1966.38	1950.79	1822.32	1816.47	1769.71	211.494	261.27	1913.54	271.534	1869.44	1958.59	1819.4	1769.78	0.0352656	(1)	-0.0720225	(1)	0.0424316	(1)	-0.107288	(1)	0.00716593	(1)	0.114454	(1)	0.067203	(1)	-0.0391503	(1)	-0.0790982	(1)	-0.106353	(1)	-0.146301	(1)	-0.0399479	(1)
LOC727495	valyl-tRNA synthetase, mitochondrial-like	270.893	310.696	314.302	347.771	338.371	331.915	339.817	339.035	271.311	317.202	228.723	296.746	275.247	304.484	266.327	29.7944	331.363	335.144	339.426	294.257	262.734	289.865	266.327	0.18699	(1)	0.204778	(1)	0.223098	(1)	0.0177881	(1)	0.0361087	(1)	0.0183206	(1)	-0.16347	(1)	-0.0216933	(1)	-0.143875	(1)	0.141777	(1)	0.0195955	(1)	-0.122181	(1)
LOC725274	3-hydroxyacyl-CoA dehydrogenase type-2-like	4431.97	4348.98	4770.1	4108.36	4265.74	4591.81	4399.12	3999.88	3093.35	3042.5	4472.8	3232.86	3499.9	3481.17	3509.55	439.474	4439.23	4428.78	4199.53	367.924	3852.83	349.536	359.547	0.0159333	(1)	0.012531	(1)	-0.0641581	(1)	-0.00340232	(1)	-0.0800914	(1)	-0.0766891	(1)	0.328655	(1)	0.186186	(1)	0.194022	(1)	-0.14247	(1)	-0.134634	(1)	0.00783626	(1)
nwk (LOC409323)	hypothetical protein LOC409323	678.743	685.359	621.315	618.547	621.072	601.113	679.634	629.637	813.934	763.047	929.186	690.666	813.876	809.111	810.183	682.56	619.931	611.927	654.636	788.496	89.9259	811.493	81.1826	-0.13777	(1)	-0.158487	(1)	-0.0591869	(1)	-0.0207171	(1)	0.0785834	(1)	0.0993005	(1)	0.0386965	(1)	0.0414857	(1)	0.0391537	(1)	0.00278925	(1)	0.000457215	(1)	-0.00233203	(1)
LOC725424	nurim homolog	9.06333	11.4226	15.4873	18.1671	13.9176	12.5433	8.7632	24.6737	17.1461	17.6223	20.6486	19.8527	27.2874	25.6108	34.8466	1.24299	16.8272	13.2344	16.7185	17.3842	2.25652	26.4498	34.8466	0.716161	(1)	0.369225	(1)	0.706805	(1)	-0.346937	(1)	-0.00935623	(1)	0.33758	(1)	0.220191	(1)	0.605441	(1)	1.00324	(1)	0.385249	(1)	0.783048	(1)	0.397799	(1)
LOC411602		1481.35	2089.58	550.256	673.914	891.595	656.111	902.609	691.778	265.26	402.67	392.323	294.656	543.375	580.511	443.049	1785.47	612.848	773.854	797.193	333.966	343.49	561.943	443.492	-1.5445	(0.067)	-1.20617	(1)	-1.1633	(1)	0.338328	(1)	0.381198	(1)	0.0428703	(1)	0.0405692	(1)	0.750726	(1)	0.40777	(1)	0.710157	(1)	0.3672	(1)	-0.342957	(1)
LOC725452	hypothetical protein LOC725452	2603.19	2733.82	2255.68	2340.1	2211.16	2233.67	2151.85	2315.67	1479.6	1617.73	1859.96	1675.99	1553.01	1545.18	1645.26	2668.54	2297.89	2222.41	2233.76	1548.67	1767.97	1549.96	1645.26	-0.215721	(1)	-0.263904	(1)	-0.256556	(1)	-0.0481832	(1)	-0.040835	(1)	0.00734825	(1)	0.19107	(1)	0.000398701	(1)	0.0872842	(1)	-0.190671	(1)	-0.103785	(1)	0.0868855	(1)
RecQ4 (LOC410301)	ATP-dependent DNA helicase Q4	251.759	211.7	190.403	201.569	240.948	226.744	220.054	175.457	253.157	232.615	243.018	291.522	259.823	236.188	253.882	231.729	195.986	233.846	197.756	242.886	267.27	248.583	253.882	-0.241692	(1)	0.0131188	(1)	-0.228723	(1)	0.25481	(1)	0.0129687	(1)	-0.241842	(1)	0.138019	(1)	0.030096	(1)	0.0638809	(1)	-0.107923	(1)	-0.0741377	(1)	0.0337849	(1)
LOC100578032	hypothetical protein LOC100578032	2.01407	2.28453	10.0212	5.19061	0.869849	3.85948	9.73688	5.48305	6.05155	4.40558	7.94176	1.04488	2.37282	4.74273	2.48904	2.14938	7.65911	2.36466	7.69965	5.22857	4.49333	3.55778	2.48944	1.82325	(1)	0.137767	(1)	1.82402	(1)	-1.68549	(1)	0.000768726	(1)	1.68626	(1)	-0.218634	(1)	-0.555441	(1)	-1.07083	(1)	-0.336806	(1)	-0.852192	(1)	-0.515386	(1)
DIP2 (LOC408342)	disco-interacting protein 2	221.548	503.358	211.357	622.008	472.328	253.761	292.107	446.868	422.6	281.076	246.195	382.426	283.552	202.04	237.703	362.453	416.682	363.442	369.487	351.838	314.314	242.796	237.734	0.201153	(1)	0.00235171	(1)	0.0277316	(1)	-0.198802	(1)	-0.173422	(1)	0.0253798	(1)	-0.162722	(1)	-0.535167	(1)	-0.56575	(1)	-0.372445	(1)	-0.403028	(1)	-0.0305826	(1)
LOC100578101		597.173	489.651	649.557	574.427	372.295	564.448	634.845	501.699	592.044	616.782	690.933	542.293	650.152	633.629	683.242	543.412	611.993	468.372	568.272	64.4127	616.613	641.896	683.242	0.171467	(1)	-0.214391	(1)	0.0645357	(1)	-0.385859	(1)	-0.106932	(1)	0.278927	(1)	0.0288313	(1)	0.0867933	(1)	0.176862	(1)	0.057962	(1)	0.14803	(1)	0.0900685	(1)
LOC100578944	hypothetical protein LOC100578944	91.6403	99.7578	46.462	52.7712	66.1085	30.8758	54.5265	77.6765	79.6788	101.328	79.4176	92.9944	51.0156	51.2215	69.6931	95.6994	49.6166	48.4922	66.1152	9.53612	86.2598	51.1185	69.6931	-0.947682	(1)	-0.980753	(1)	-0.533821	(1)	-0.0330709	(1)	0.413861	(1)	0.446932	(1)	-0.0701875	(1)	-0.824129	(1)	-0.376959	(1)	-0.753941	(0.946)	-0.306771	(1)	0.44717	(1)
LOC725581	anion exchange protein 2-like	3538.73	3379.58	1894.92	2088.35	2486.03	1726.15	2218.06	2727.82	3288.01	3957.98	4722.17	3640.36	2748.91	3131.15	3371.41	3459.15	1991.64	216.894	2472.94	3622.99	4181.27	294.372	3371.45	-0.796464	(0.180)	-0.715852	(1)	-0.484192	(1)	0.0806116	(1)	0.312272	(1)	0.23166	(1)	0.206758	(1)	-0.301351	(1)	-0.103832	(1)	-0.508109	(0.912)	-0.31059	(1)	0.197519	(1)
LOC100578128	hypothetical protein LOC100578128	8.05629	6.85359	2.73306	7.78591	7.82864	5.78921	5.84213	8.22457	13.1117	21.1468	42.8855	16.7181	16.6097	14.2282	14.9342	7.45494	5.25948	6.88927	7.33352	17.1293	29.8179	15.419	14.9342	-0.503275	(1)	-0.130769	(1)	-0.0839845	(1)	0.372506	(1)	0.419291	(1)	0.0467846	(1)	0.798937	(1)	-0.151757	(1)	-0.197838	(1)	-0.950694	(1)	-0.996775	(1)	-0.0460814	(1)
c-mos (LOC494522)	mos protein	8.05629	12.1842	15.4873	12.1114	21.7462	25.0866	19.4738	23.7599	20.1718	22.909	39.7088	37.6157	37.9651	28.4564	29.8685	1.12223	13.7994	23.4165	21.6168	21.5444	38.6622	33.2174	29.8685	0.447362	(1)	1.21028	(1)	1.09491	(1)	0.762917	(1)	0.647551	(1)	-0.115366	(1)	0.843878	(1)	0.624602	(1)	0.471576	(1)	-0.219276	(1)	-0.372301	(1)	-0.153026	(1)
LOC725641	u6 snRNA-associated Sm-like protein LSm5-like	247.731	231.499	255.997	233.577	265.304	268.234	227.843	221.15	314.681	259.929	362.144	271.669	310.839	311.123	337.265	239.615	244.787	266.769	224.496	287.351	316.966	31.9812	337.265	0.0308085	(1)	0.154872	(1)	-0.0940261	(1)	0.124063	(1)	-0.124835	(1)	-0.248898	(1)	0.141474	(1)	0.114244	(1)	0.231299	(1)	-0.0272303	(1)	0.0898249	(1)	0.117055	(1)
LOC100578246	hypothetical protein LOC100578246	1968.76	1731.67	1683.56	2054.61	1683.16	1683.7	2151.85	1791.13	1637.95	1702.32	1553.41	1083.54	1066.58	1465.5	1087.71	185.215	1869.9	1683.43	1971.49	167.136	1318.47	1266.43	187.716	0.0146432	(1)	-0.136291	(1)	0.0915938	(1)	-0.150935	(1)	0.0769506	(1)	0.227885	(1)	-0.341096	(1)	-0.399639	(1)	-0.618671	(1)	-0.0585433	(1)	-0.277575	(1)	-0.219032	(1)
LOC725688	lipopolysaccharide-induced tumor necrosis	14508.4	11131.7	10796.5	11981.6	11280.2	10051	9924.81	12725.2	8324.92	9532.8	11869.8	11212.6	5765.94	6747.96	9200.74	1282.66	11389.7	1665.62	11325.2	8928.86	11541.2	6256.95	92.7377	-0.170753	(1)	-0.265435	(1)	-0.178889	(1)	-0.0946823	(1)	-0.00813638	(1)	0.0865459	(1)	0.370243	(1)	-0.513016	(0.821)	0.0432733	(1)	-0.883259	(0.003)	-0.32697	(1)	0.556289	(1)
awd (LOC409861)	nucleoside diphosphate kinase	9590.01	8424.58	10086.8	9324.06	8526.26	10090.6	9225.7	9083.58	5336.46	5492	7649.5	5896.26	6032.89	6444.43	6252.47	97.2943	975.435	938.429	9154.64	5414.23	6772.88	6238.66	6252.47	0.107699	(1)	0.047444	(1)	0.0234092	(1)	-0.060255	(1)	-0.0842898	(1)	-0.0240348	(1)	0.323013	(1)	0.204479	(1)	0.20767	(1)	-0.118534	(1)	-0.115344	(1)	0.0031906	(1)
sxc (LOC551425)	UDP-N-acetylglucosamine--peptide	1427.98	1474.28	1564.22	1577.94	1476.13	1448.27	1616.32	1605.62	1945.57	1756.07	1950.5	1836.9	1898.25	1630.55	1775.93	1451.13	1571.83	1462.3	161.978	185.821	1893.7	1764.43	1775.93	0.114582	(1)	0.0109647	(1)	0.150753	(1)	-0.103617	(1)	0.0361713	(1)	0.139789	(1)	0.0330416	(1)	-0.0689848	(1)	-0.0595897	(1)	-0.102026	(1)	-0.0926313	(1)	0.00939506	(1)
LOC100578396	hypothetical protein LOC100578396	28.197	24.3683	27.3306	38.0644	33.0543	25.0866	25.3159	40.209	38.3265	34.3636	28.5903	39.7055	43.8971	20.868	22.4014	26.2827	32.6975	29.7426	32.7625	36.3454	34.1479	32.3826	22.4136	0.31507	(1)	0.145441	(1)	0.317932	(1)	-0.169629	(1)	0.00286226	(1)	0.172491	(1)	-0.0899615	(1)	-0.166541	(1)	-0.698172	(1)	-0.0765792	(1)	-0.60821	(1)	-0.531631	(1)
Mir14 (LOC100315661)	ame-miR-14	0	0	0	0	1.7397	1.92974	3.89475	0.913841	1.00859	2.64335	1.58835	3.13464	3.55923	3.79419	4.97808			1.83472	2.44297	1.82597	2.3615	3.67676	4.97887											0.390057	(1)	0.371037	(1)	1.00975	(1)	1.44693	(1)	0.638712	(1)	1.07589	(1)	0.437176	(1)
snRNP70K (LOC551391)	u1 small nuclear ribonucleoprotein 70 kDa	3245.68	2643.2	2909.8	2712.09	2444.28	2793.3	2797.41	2566.07	3025.78	3059.24	3205.29	2732.36	3273.3	3424.25	3163.57	2944.44	281.944	2618.79	2681.74	342.572	2968.83	3348.78	3163.57	-0.066938	(1)	-0.169095	(1)	-0.134825	(1)	-0.102157	(1)	-0.0678875	(1)	0.0342694	(1)	-0.035367	(1)	0.138374	(1)	0.056293	(1)	0.173741	(1)	0.09166	(1)	-0.0820808	(1)
LOC100578489		0	0	0	0	0	0	0	0	1.00859	0	1.58835	0	1.18641	0	0					0.542961	0.794176	0.593242														0.655188	(1)	0.234258	(1)			-0.42093	(1)
LOC100578509	hypothetical protein LOC100578509	1.00704	0	0	0	0	0.964869	0.973688	0	0	0	0	0	0	0	0	0.535182		0.482435	0.486844							-0.0617108	(1)	-0.0485838	(1)					0.013127	(1)
LOC100578069	hypothetical protein LOC100578069	0	0	0.91102	0	0	0	0.973688	0	0	0	0	0	1.18641	0	0		0.455598		0.486844			0.593242										0.0959779	(1)
LOC408343	potassium voltage-gated channel protein	26.1829	20.5608	22.7755	41.5248	43.4924	23.1569	37.9738	29.2429	57.4898	27.3146	27.002	33.4362	30.8466	32.2506	36.0911	23.3719	32.1517	33.3246	33.6838	42.4219	3.21978	31.5487	36.9185	0.460054	(1)	0.511818	(1)	0.524049	(1)	0.0517633	(1)	0.0639946	(1)	0.0122314	(1)	-0.488679	(1)	-0.426563	(1)	-0.232496	(1)	0.0621166	(1)	0.256183	(1)	0.194066	(1)
kek2 (LOC725924)	hypothetical protein LOC725924	0	0	1.82204	0	0	0	0	0	0	0	0	0	0	0.948547	0		0.911197					0.474273
LOC100577175		0	0	0	0	0	0	0	0	0	0	0	0	1.18641	0.948547	0							1.67478
LOC100577205		0	0.76151	0	0.865101	0.869849	0	0.973688	0.913841	0	0	0	0	0	1.89709	0	0.387548	0.432555	0.434924	0.943765			0.948547		0.184006	(1)	0.191902	(1)	1.30957	(1)	0.00789609	(1)	1.12556	(1)	1.11766	(1)
SPATA20 (LOC409622)	spermatogenesis-associated protein 20	596.166	520.873	563.921	545.879	641.948	568.308	497.555	507.182	639.447	656.432	627.399	581.998	626.424	704.77	681.997	558.52	554.9	65.1282	52.3683	647.94	64.6987	665.597	681.998	-0.0093788	(1)	0.115634	(1)	-0.152861	(1)	0.125013	(1)	-0.143482	(1)	-0.268495	(1)	-0.0996432	(1)	0.0387892	(1)	0.0739058	(1)	0.138432	(1)	0.173549	(1)	0.0351166	(1)
LOC551883		491.434	554.379	540.235	587.404	568.881	514.275	527.739	551.046	784.685	662.6	730.642	621.704	748.624	713.307	628.483	522.964	563.819	541.578	539.393	723.642	676.173	73.9655	628.483	0.10868	(1)	0.0506169	(1)	0.0447832	(1)	-0.0580629	(1)	-0.0638966	(1)	-0.00583373	(1)	-0.0978846	(1)	0.0145265	(1)	-0.203404	(1)	0.112411	(1)	-0.105519	(1)	-0.21793	(1)
LOC724397	tetratricopeptide repeat protein 39C-like	7.04925	9.13812	12.7543	7.78591	14.7874	17.3676	17.5264	14.6215	32.275	37.888	20.6486	32.3913	30.8466	26.5593	24.8904	8.93685	1.27925	16.7754	16.7392	35.8149	26.5199	28.7297	24.8944	0.343581	(1)	0.990178	(1)	0.989854	(1)	0.646597	(1)	0.646273	(1)	-0.000324167	(1)	-0.403633	(1)	-0.28951	(1)	-0.49512	(1)	0.114123	(1)	-0.0914876	(1)	-0.20561	(1)
LOC550987	soluble calcium-activated nucleotidase 1-like	368.575	321.357	368.052	367.668	358.378	417.788	383.633	481.594	407.471	447.607	470.152	418.997	453.208	408.824	419.403	344.966	367.86	388.838	432.614	427.539	444.575	431.159	419.433	0.0927016	(1)	0.16991	(1)	0.326625	(1)	0.0772087	(1)	0.233923	(1)	0.156714	(1)	0.0563685	(1)	0.0116839	(1)	-0.0277188	(1)	-0.0446846	(1)	-0.0840873	(1)	-0.0394027	(1)
LOC724287	rhomboid-related protein 3-like	1.00704	0.76151	0.91102	1.7302	6.08894	1.92974	2.92107	2.74152	5.04296	4.40558	1.58835	4.17952	3.55923	0.948547	4.97808	0.884273	1.32619	4.934	2.83129	4.72427	2.88394	2.25389	4.97887	0.578642	(1)	2.1808	(1)	1.6789	(1)	1.60216	(1)	1.10026	(1)	-0.501903	(1)	-0.712053	(1)	-1.06768	(1)	0.0754974	(1)	-0.355625	(1)	0.78755	(1)	1.14318	(1)
LOC552480	BTB/POZ domain-containing protein KCTD5-like	166.161	150.779	160.339	141.011	153.093	172.712	134.369	149.87	131.117	149.79	117.538	115.982	105.59	114.774	110.762	158.47	15.6755	162.925	142.119	14.4534	116.76	11.1823	11.7623	-0.0727648	(1)	0.0397992	(1)	-0.157105	(1)	0.112564	(1)	-0.0843403	(1)	-0.196904	(1)	-0.266547	(1)	-0.3502	(1)	-0.342625	(1)	-0.0836528	(1)	-0.0760778	(1)	0.00757493	(1)
LOC413827	ras-related protein Rab-40C-like (>1 isoforms)	465.251	501.835	442.756	417.844	428.835	422.613	451.791	410.315	347.964	354.209	279.55	359.439	263.383	320.609	343.488	483.543	43.2997	425.725	431.533	351.866	319.494	291.996	343.488	-0.168302	(1)	-0.183725	(1)	-0.165778	(1)	-0.0154232	(1)	0.00252359	(1)	0.0179468	(1)	-0.136036	(1)	-0.26588	(1)	-0.0315692	(1)	-0.129843	(1)	0.104467	(1)	0.234311	(1)
LOC552085	developmentally-regulated GTP-binding protein	303.118	290.897	260.552	268.181	328.803	273.058	280.422	332.638	332.835	333.062	428.855	353.17	334.567	379.419	354.688	297.732	264.366	3.93422	36.533	332.949	391.123	356.993	354.688	-0.167959	(1)	0.0189314	(1)	0.0455308	(1)	0.186891	(1)	0.21349	(1)	0.0265994	(1)	0.231914	(1)	0.100595	(1)	0.0912512	(1)	-0.131318	(1)	-0.140662	(1)	-0.00934406	(1)
LOC552056	eukaryotic translation initiation factor 3	1108.75	1113.33	1364.71	1208.55	1220.4	1345.99	1104.16	1260.19	998.506	994.781	1054.67	1049.06	943.195	985.54	1050.38	1111.38	1286.63	1283.2	1182.17	996.644	151.863	964.367	15.3754	0.211687	(1)	0.207834	(1)	0.0895364	(1)	-0.00385312	(1)	-0.12215	(1)	-0.118297	(1)	0.0777969	(1)	-0.0474948	(1)	0.0757549	(1)	-0.125292	(1)	-0.00204202	(1)	0.12325	(1)
LOC100576642	hypothetical protein LOC100576642	0	0	0	0	0	0	0	0	0	0	0	0	0	0	0
LOC100577090	hypothetical protein LOC100577090	1.00704	0	0	0	0	0	0	0	0	0	0	0	0	0.948547	0	0.535182						0.474273
LOC412606	chromosome transmission fidelity protein 18	367.568	517.065	470.086	456.773	441.013	453.488	454.712	485.25	391.334	438.796	376.439	542.293	383.21	369.933	358.422	442.317	463.43	447.26	469.982	415.65	459.366	376.572	358.422	0.0672711	(1)	0.0160048	(1)	0.087523	(1)	-0.0512663	(1)	0.0202519	(1)	0.0715182	(1)	0.146307	(1)	-0.140413	(1)	-0.211679	(1)	-0.28672	(1)	-0.357986	(1)	-0.0712657	(1)
LOC551379	chitobiosyldiphosphodolichol	69.4855	89.8581	121.166	117.654	113.08	103.241	95.4215	111.489	88.7561	81.0628	54.004	85.6802	85.4214	77.7808	97.0726	79.6718	119.497	18.1667	13.4554	84.9943	69.8428	81.6112	97.7257	0.583778	(1)	0.441034	(1)	0.376862	(1)	-0.142744	(1)	-0.206916	(1)	-0.0641721	(1)	-0.281828	(1)	-0.0573358	(1)	0.193139	(1)	0.224492	(1)	0.474967	(1)	0.250475	(1)
LOC409470	zinc finger protein 268-like	2274.9	2954.66	2071.66	2919.72	3146.24	2472.96	2299.85	2907.84	2720.17	2414.26	2047.39	2488.91	1846.05	1820.26	1998.7	2614.78	2495.69	289.614	263.847	2567.22	2268.15	1833.16	1998.7	-0.0672503	(1)	0.103678	(1)	-0.00604273	(1)	0.170928	(1)	0.0612076	(1)	-0.109721	(1)	-0.178692	(1)	-0.485875	(1)	-0.361144	(1)	-0.307183	(1)	-0.182452	(1)	0.124732	(1)
LOC100576782		483.377	501.073	581.231	567.506	535.827	594.359	586.16	572.065	533.545	532.195	571.807	499.453	550.493	553.951	527.677	492.225	574.368	565.932	579.112	532.87	535.63	552.222	527.677	0.222657	(1)	0.199169	(1)	0.234524	(1)	-0.0234878	(1)	0.0118671	(1)	0.035355	(1)	0.00745272	(1)	0.0514661	(1)	-0.0141295	(1)	0.0440133	(1)	-0.0215822	(1)	-0.0655956	(1)
LOC727502	hypothetical protein LOC727502	149.041	145.448	129.365	123.709	142.655	130.257	171.369	116.972	100.859	113.664	87.3594	138.969	112.709	106.237	103.295	147.245	126.537	136.456	144.175	17.2616	113.164	19.4732	13.2952	-0.218657	(1)	-0.109779	(1)	-0.0304422	(1)	0.108878	(1)	0.188214	(1)	0.0793364	(1)	0.0772836	(1)	0.0294411	(1)	-0.0543615	(1)	-0.0478426	(1)	-0.131645	(1)	-0.0838025	(1)
LOC727236	hypothetical protein LOC727236	855.981	1067.64	863.647	1043.31	967.272	876.101	873.398	871.804	1030.78	911.956	892.654	1084.59	1017.94	968.466	939.613	961.887	953.479	921.686	872.615	971.369	988.62	993.224	939.613	-0.0125484	(1)	-0.0614739	(1)	-0.140427	(1)	-0.0489254	(1)	-0.127879	(1)	-0.0789532	(1)	0.025397	(1)	0.0320689	(1)	-0.0479526	(1)	0.00667186	(1)	-0.0733496	(1)	-0.0800214	(1)
LOC409136	72 kDa inositol polyphosphate	225.576	219.315	224.111	192.918	225.291	185.255	194.738	159.008	240.045	282.839	227.134	294.656	341.686	333.889	276.283	222.445	28.5142	25.2729	176.873	261.442	26.8953	337.788	276.283	-0.0933061	(1)	-0.115909	(1)	-0.330738	(1)	-0.0226027	(1)	-0.237432	(1)	-0.214829	(1)	-0.00301846	(1)	0.369625	(1)	0.0796599	(1)	0.372643	(1)	0.0826783	(1)	-0.289965	(1)
Usp7 (LOC409332)	LOW QUALITY PROTEIN: ubiquitin carboxyl-terminal	1572.99	2029.42	1542.36	2021.74	2147.66	1618.09	1769.19	1938.26	1768.06	1660.91	1310.39	1892.28	1385.72	1366.86	1371.46	181.27	1782.49	1882.87	1853.72	1714.48	161.334	1376.3	1371.46	-0.0154272	(1)	0.0639702	(1)	0.0414628	(1)	0.0793974	(1)	0.05689	(1)	-0.0225075	(1)	-0.0984996	(1)	-0.316989	(1)	-0.32206	(1)	-0.21849	(1)	-0.223561	(1)	-0.00507118	(1)
LOC411796	serine hydroxymethyltransferase	328.294	290.135	264.196	269.912	304.447	296.215	306.712	238.513	182.555	227.328	187.426	211.066	247.959	294.998	209.079	39.2145	267.536	3.33945	272.612	24.9417	199.246	271.479	29.7939	-0.211479	(1)	-0.0420549	(1)	-0.181758	(1)	0.169424	(1)	0.0297206	(1)	-0.139703	(1)	-0.0406649	(1)	0.405626	(1)	0.0288375	(1)	0.446291	(1)	0.0695024	(1)	-0.376788	(1)
LOC411795	Golgi to ER traffic protein 4 homolog	370.589	411.977	386.272	393.621	421.877	365.685	414.791	473.37	391.334	403.552	343.084	409.593	317.957	326.3	347.221	391.284	389.947	393.781	444.847	397.443	376.339	322.129	347.221	-0.00493582	(1)	0.00918099	(1)	0.182609	(1)	0.0141168	(1)	0.187544	(1)	0.173428	(1)	-0.0787155	(1)	-0.303109	(1)	-0.194892	(1)	-0.224394	(1)	-0.116176	(1)	0.108217	(1)
LOC551162	hypothetical protein LOC551162	218.527	207.131	204.068	228.387	224.421	233.498	234.659	246.737	168.435	192.965	125.48	149.418	131.691	164.099	131.919	212.829	216.228	228.96	24.6985	18.6997	137.449	147.895	131.919	0.0228572	(1)	0.1054	(1)	0.177531	(1)	0.0825431	(1)	0.154674	(1)	0.0721308	(1)	-0.3947	(1)	-0.289021	(1)	-0.453941	(1)	0.105678	(1)	-0.059241	(1)	-0.164919	(1)
LOC551114	methyltransferase-like protein 9-like	777.432	718.865	774.367	796.758	694.139	824.963	722.477	650.655	748.375	785.956	648.048	614.39	689.303	714.256	802.716	748.149	785.562	759.551	686.566	767.166	631.219	71.7795	82.7155	0.070401	(1)	0.0218224	(1)	-0.123927	(1)	-0.0485787	(1)	-0.194328	(1)	-0.145749	(1)	-0.281399	(1)	-0.128521	(1)	0.0653503	(1)	0.152878	(1)	0.346749	(1)	0.193871	(1)
LOC410304	zinc finger homeobox protein 3-like	650.546	680.79	501.972	520.791	685.441	466.997	619.266	533.683	760.479	638.81	422.502	756.493	523.206	534.032	525.188	665.668	511.381	576.219	576.475	699.644	589.498	528.619	525.188	-0.380402	(1)	-0.208185	(1)	-0.207545	(1)	0.172217	(1)	0.172857	(1)	0.00064021	(1)	-0.247136	(1)	-0.404393	(1)	-0.413789	(1)	-0.157257	(1)	-0.166653	(1)	-0.00939563	(1)
LOC100577012	hypothetical protein LOC100577012	1.00704	5.33057	1.82204	0.865101	2.60955	1.92974	1.94738	1.82768	3.02578	1.76223	3.1767	2.08976	3.55923	0.948547	2.48904	3.16882	1.34357	2.26964	1.88753	2.39452	2.63323	2.25389	2.48944	-1.23787	(1)	-0.481472	(1)	-0.747438	(1)	0.756393	(1)	0.490427	(1)	-0.265966	(1)	0.137409	(1)	-0.0870117	(1)	0.0561634	(1)	-0.22442	(1)	-0.0812452	(1)	0.143175	(1)
LOC100577455	hypothetical protein LOC100577455	322.252	274.143	357.12	323.548	265.304	315.512	299.896	285.118	485.133	372.712	206.486	362.574	390.328	393.647	324.82	298.198	34.3338	29.4836	292.572	428.923	284.53	391.988	324.82	0.190682	(1)	-0.0381871	(1)	-0.0277962	(1)	-0.228869	(1)	-0.218478	(1)	0.0103909	(1)	-0.592139	(1)	-0.129909	(1)	-0.401078	(1)	0.462229	(1)	0.191061	(1)	-0.271169	(1)
LOC412972	WD repeat domain phosphoinositide-interacting	222.555	236.829	195.869	245.689	227.9	235.428	212.264	240.34	185.581	204.419	160.424	194.348	182.707	197.298	231.481	229.692	22.779	231.664	226.321	195.392	177.386	19.232	231.488	-0.0570996	(1)	0.012333	(1)	-0.0214521	(1)	0.0694325	(1)	0.0356475	(1)	-0.033785	(1)	-0.136585	(1)	-0.0374574	(1)	0.247418	(1)	0.0991277	(1)	0.384003	(1)	0.284875	(1)
LOC725084	hypothetical protein LOC725084	30.2111	26.6528	39.1738	35.4691	25.2256	25.0866	45.7634	31.0706	39.3351	40.5314	47.6506	36.5708	54.5748	55.0157	47.2918	28.432	37.3215	25.1562	38.417	39.9332	42.1169	54.7953	47.2918	0.392493	(1)	-0.176605	(1)	0.43423	(1)	-0.569098	(1)	0.0417372	(1)	0.610835	(1)	0.0765964	(1)	0.456461	(1)	0.243999	(1)	0.379864	(1)	0.167403	(1)	-0.212462	(1)
LOC725050	UPF0193 protein EVG1-like	8.05629	5.33057	9.1102	10.3812	4.34924	9.64869	6.81582	2.74152	4.03437	5.2867	12.7068	6.26928	8.30486	6.63983	7.46712	6.69343	9.74575	6.99897	4.77867	4.66535	9.48849	7.47234	7.46712	0.542021	(1)	0.0643965	(1)	-0.486136	(1)	-0.477624	(1)	-1.02816	(1)	-0.550533	(1)	1.02562	(1)	0.681065	(1)	0.680057	(1)	-0.344551	(1)	-0.345559	(1)	-0.00100862	(1)
LOC412842	sorting nexin-8-like	207.45	205.608	202.246	195.513	259.215	223.85	223.948	193.734	309.638	272.265	303.375	245.547	450.835	277.924	292.462	26.5285	198.88	241.532	28.8413	29.9515	274.462	364.38	292.462	-0.0544459	(1)	0.225875	(1)	0.016066	(1)	0.280321	(1)	0.0705119	(1)	-0.209809	(1)	-0.084177	(1)	0.324664	(1)	0.00747191	(1)	0.408841	(1)	0.0916489	(1)	-0.317192	(1)
LOC724953	UPF0406 protein C16orf57 homolog	50.3518	44.9291	57.3942	52.7712	51.3211	55.9624	37.9738	68.5381	79.6788	63.4404	52.4156	71.0519	53.3884	60.707	65.9596	47.6444	55.8273	53.6417	53.256	71.5596	61.7337	57.4769	65.9596	0.209412	(1)	0.171169	(1)	0.160756	(1)	-0.0382432	(1)	-0.0486562	(1)	-0.010413	(1)	-0.213086	(1)	-0.326977	(1)	-0.117563	(1)	-0.113891	(1)	0.0955228	(1)	0.209414	(1)
LOC552308	zinc finger CCHC-type and RNA-binding	142.999	148.494	172.183	162.639	165.271	155.344	168.448	149.87	144.229	148.028	141.363	194.348	164.911	205.835	148.098	145.747	167.419	16.376	159.159	146.128	167.856	185.373	148.979	0.199929	(1)	0.137379	(1)	0.127005	(1)	-0.0625503	(1)	-0.0729242	(1)	-0.0103739	(1)	0.199986	(1)	0.343195	(1)	0.019317	(1)	0.143209	(1)	-0.180669	(1)	-0.323878	(1)
LOC410118	d-glucuronyl C5-epimerase-like	324.266	305.365	291.526	285.483	326.193	307.793	285.291	384.727	239.036	251.118	203.309	251.816	204.062	231.445	230.236	314.816	288.548	316.993	335.893	245.773	227.563	217.754	23.2362	-0.125911	(1)	0.00994545	(1)	0.0896927	(1)	0.135857	(1)	0.215604	(1)	0.0797472	(1)	-0.106973	(1)	-0.170539	(1)	-0.0901221	(1)	-0.0635654	(1)	0.0168513	(1)	0.0804167	(1)
Cp190 (LOC724841)	hypothetical protein LOC724841	857.995	926.757	726.994	868.561	955.094	793.122	796.477	826.112	792.753	770.096	736.995	812.917	657.27	713.307	704.398	892.376	797.778	874.182	811.295	781.425	774.956	685.289	74.3984	-0.161665	(1)	-0.02984	(1)	-0.137426	(1)	0.131825	(1)	0.0242395	(1)	-0.107586	(1)	-0.0119924	(1)	-0.189395	(1)	-0.149715	(1)	-0.177403	(1)	-0.137723	(1)	0.0396797	(1)
dys (LOC552367)	hypothetical protein LOC552367	218.527	223.884	149.407	183.401	285.31	129.292	229.79	116.972	256.182	277.552	270.02	206.886	382.023	438.229	331.042	221.254	166.443	27.3144	173.382	266.867	238.454	41.1268	331.424	-0.410693	(1)	-0.0936563	(1)	-0.35144	(1)	0.317037	(1)	0.0592534	(1)	-0.257784	(1)	-0.162416	(1)	0.619946	(1)	0.310894	(1)	0.782362	(0.680)	0.47331	(1)	-0.309052	(1)
MED1 (LOC412422)	hypothetical protein LOC412422	195.365	438.63	178.56	481.861	521.909	209.377	247.317	408.487	370.153	204.419	196.956	404.369	277.62	171.687	207.835	316.997	33.2157	365.643	327.919	287.286	3.66218	224.653	27.8349	0.0589157	(1)	0.205965	(1)	0.0487938	(1)	0.147049	(1)	-0.010122	(1)	-0.157171	(1)	0.0656546	(1)	-0.354789	(1)	-0.467051	(1)	-0.420443	(1)	-0.532706	(1)	-0.112262	(1)
LOC552313	sterol O-acyltransferase 1-like	4027.14	4058.85	3603.08	3099.66	3147.98	4069.82	3112.88	3093.35	173.478	176.223	120.715	188.078	331.008	174.533	180.455	442.992	3351.37	368.928	313.117	174.856	154.397	252.773	18.4554	-0.270673	(1)	-0.163864	(1)	-0.381705	(1)	0.106808	(1)	-0.111033	(1)	-0.217841	(1)	-0.179482	(1)	0.531704	(1)	0.0455197	(1)	0.711186	(0.634)	0.225001	(1)	-0.486184	(1)
LOC412215	hypothetical protein LOC412215	21910.1	20999.4	17568.1	21452.8	22349.9	17374.4	16449.5	20371.3	8167.58	9327.5	9644.47	9266	6618.97	6385.62	7703.58	21454.7	1951.44	19862.1	1841.42	8747.54	9455.24	652.295	773.58	-0.13705	(1)	-0.111275	(1)	-0.220774	(1)	0.0257753	(1)	-0.0837238	(1)	-0.109499	(1)	0.112236	(1)	-0.427929	(1)	-0.183349	(1)	-0.540165	(0.568)	-0.295584	(1)	0.24458	(1)
LOC727052	hypothetical protein LOC727052	20.1407	15.9917	8.19918	12.1114	25.2256	9.64869	11.6843	19.1907	8.06874	2.64335	12.7068	7.31416	10.6777	13.2797	36.0911	18.6622	1.1553	17.4372	15.4375	5.35644	1.14892	11.9787	36.9185	-0.831062	(1)	-0.0511297	(1)	-0.226859	(1)	0.779932	(1)	0.604203	(1)	-0.175729	(1)	0.902273	(1)	1.16123	(1)	2.7524	(0.320)	0.258955	(1)	1.85013	(1)	1.59118	(1)
LOC411614	hypothetical protein LOC411614	28.197	24.3683	17.3094	14.7067	22.6161	9.64869	18.5001	15.5353	12.1031	15.8601	17.4719	11.4937	18.9825	21.8166	70.9377	26.2827	16.8459	16.1324	17.1769	13.9817	14.4828	2.39956	7.93766	-0.715314	(1)	-0.704152	(1)	-0.627076	(1)	0.0111621	(1)	0.0882379	(1)	0.0770758	(1)	0.0508084	(1)	0.545008	(1)	2.34302	(0.151)	0.494199	(1)	2.29221	(0.388)	1.79801	(1)
LOC727037	lipase member H-A-like	1088.61	1000.62	1718.18	1013.03	859.411	756.457	700.082	650.655	265.26	171.818	392.323	401.234	320.33	845.155	940.857	144.615	1365.68	87.934	675.368	218.539	396.779	582.743	94.8573	0.386572	(1)	-0.370662	(1)	-0.629225	(1)	-0.757234	(1)	-1.0158	(1)	-0.258563	(1)	0.860445	(1)	1.41497	(0.371)	2.10609	(0.054)	0.554525	(1)	1.24564	(1)	0.691117	(1)
LOC727032	pancreatic lipase-related protein 3-like	0	5.33057	3.64408	4.32551	0.869849	3.85948	0.973688	5.48305	0	0.881117	3.1767	13.5834	4.74563	1.89709	8.71164	2.66528	3.98479	2.36466	3.22837	0.445584	8.38746	3.32136	8.71164	0.580215	(1)	-0.172655	(1)	0.276516	(1)	-0.75287	(1)	-0.3037	(1)	0.449171	(1)	4.24956	(0.818)	2.91437	(1)	4.30554	(1)	-1.33519	(1)	0.0559815	(1)	1.39117	(1)
LOC100576127	pancreatic triacylglycerol lipase-like	1.00704	0	0.91102	0.865101	0	0	0	0	0	0	0	0	0	0	0	0.535182	0.888637							0.818614	(1)
LOC413723	pancreatic triacylglycerol lipase-like	3.02111	1.52302	0	1.7302	2.60955	2.89461	1.94738	2.74152	2.01718	0	0	1.04488	7.11845	2.84564	2.48904	2.27264	0.865114	2.75277	2.34446	1.85922	0.522443	4.98245	2.48944	-1.39306	(1)	0.276517	(1)	0.0452459	(1)	1.66958	(1)	1.43831	(1)	-0.231271	(1)	-0.949005	(1)	2.3044	(1)	1.30325	(1)	3.2534	(1)	2.25225	(1)	-1.00115	(1)
LOC551268	pancreatic triacylglycerol lipase-like	0	6.09208	0.91102	3.4604	1.7397	4.82435	2.92107	4.56921	1.00859	0.881117	0	1.04488	1.18641	1.89709	1.24452	3.46384	2.18571	3.28221	3.74514	0.944855	0.522443	1.54175	1.24452	-0.478831	(1)	0.107651	(1)	0.298084	(1)	0.586481	(1)	0.776915	(1)	0.190433	(1)	-0.854826	(1)	0.706406	(1)	0.397425	(1)	1.56123	(1)	1.25225	(1)	-0.30898	(1)
LOC727190	pancreatic lipase-related protein 2-like	0	2.28453	6.37714	0	0	9.64869	0	0	14.1203	4.40558	1.58835	0	0	0	0	1.14226	3.18857	4.82435		9.26294	0.794176			1.48101	(1)	2.07844	(1)			0.597424	(1)					-3.54394	(1)
LOC727193	pancreatic triacylglycerol lipase-like	1.00704	0.76151	0	13.8416	0	0	0	0.913841	0	0	0	0	0	0	3.73356	0.884273	6.92883		0.456926				3.73357	2.96838	(1)			-0.952549	(1)			-3.92093	(1)
Ipp (LOC409853)	inositol polyphosphate 1-phosphatase	233.632	224.645	233.221	240.498	214.853	204.552	203.501	208.356	281.397	267.86	254.136	270.624	268.128	262.747	299.929	229.139	236.86	29.7245	25.9283	274.628	262.382	265.438	299.929	0.0478096	(1)	-0.127879	(1)	-0.15408	(1)	-0.175688	(1)	-0.20189	(1)	-0.0262014	(1)	-0.065822	(1)	-0.0491064	(1)	0.127142	(1)	0.0167156	(1)	0.192964	(1)	0.176248	(1)
Ppox (LOC552482)	LOW QUALITY PROTEIN: protoporphyrinogen oxidase	401.808	357.91	378.984	397.946	351.419	395.596	357.344	370.106	391.334	372.712	411.383	375.112	411.684	480.913	368.378	379.859	388.465	373.576	363.725	382.231	393.248	446.298	368.378	0.0323237	(1)	-0.0243245	(1)	-0.0626155	(1)	-0.0566482	(1)	-0.0949392	(1)	-0.038291	(1)	0.0417781	(1)	0.224349	(1)	-0.0524731	(1)	0.182571	(1)	-0.0942512	(1)	-0.276822	(1)
LOC551815	uncharacterized protein C9orf114 homolog	296.069	285.566	294.259	272.507	268.783	289.461	287.238	307.051	316.698	313.678	322.435	311.374	347.618	325.352	292.462	29.8175	283.384	279.122	297.144	315.188	316.949	336.485	292.462	-0.0373599	(1)	-0.0592178	(1)	0.0310503	(1)	-0.0218578	(1)	0.0684102	(1)	0.0902681	(1)	0.00783839	(1)	0.094329	(1)	-0.107961	(1)	0.0864906	(1)	-0.1158	(1)	-0.20229	(1)
ImpL2 (LOC409512)	neural/ectodermal development factor IMP-L2	405.836	208.654	190.403	211.95	237.469	316.477	173.317	172.716	324.767	221.16	852.945	248.682	206.435	181.172	231.481	37.2447	21.1764	276.973	173.163	272.964	55.8133	193.838	231.488	-0.610927	(1)	-0.149643	(1)	-0.82848	(1)	0.461283	(1)	-0.217554	(1)	-0.678837	(1)	1.01286	(1)	-0.494112	(1)	-0.237816	(1)	-1.50697	(1)	-1.25067	(1)	0.256296	(1)
LOC100578863	hypothetical protein LOC100578863	0	0	0	0	0.869849	1.92974	0	0	0	0	0	0	0	0.948547	1.24452			1.39979				0.474273	1.24452																							1.3918	(1)
LOC724896	transmembrane protein 170A-like (>1 isoforms)	154.077	124.888	154.873	150.528	145.265	129.292	130.474	158.095	121.031	158.601	174.719	157.777	160.165	161.253	140.631	139.483	152.746	137.279	144.284	139.817	166.248	16.795	14.6378	0.130625	(1)	-0.0229729	(1)	0.0488354	(1)	-0.153598	(1)	-0.0817893	(1)	0.0718083	(1)	0.249806	(1)	0.200921	(1)	0.00838242	(1)	-0.0488843	(1)	-0.241423	(1)	-0.192539	(1)
LOC411483	e3 UFM1-protein ligase 1 homolog	893.241	932.849	1020.34	926.523	1002.07	1071	1024.32	986.035	736.272	729.565	981.602	865.161	822.181	721.844	747.957	913.453	973.433	136.535	15.1774	732.919	923.381	772.126	747.957	0.0923947	(1)	0.183011	(1)	0.138692	(1)	0.0906161	(1)	0.046297	(1)	-0.0443191	(1)	0.333274	(1)	0.0749715	(1)	0.0293018	(1)	-0.258302	(1)	-0.303972	(1)	-0.0456697	(1)
LOC413906	monocarboxylate transporter 10-like	320.238	271.097	297.903	317.492	318.365	258.585	255.106	262.272	344.939	289.887	214.428	356.304	246.773	305.432	345.977	295.668	37.6978	288.475	258.689	317.413	285.366	276.125	345.977	0.0575383	(1)	-0.0355304	(1)	-0.192755	(1)	-0.0930687	(1)	-0.250293	(1)	-0.157224	(1)	-0.153548	(1)	-0.201157	(1)	0.124313	(1)	-0.0476087	(1)	0.277862	(1)	0.32547	(1)
LOC100576225	hypothetical protein LOC100576225	4.02815	8.37661	1.82204	0.865101	6.08894	0.964869	5.84213	2.74152	7.06015	7.04893	6.35341	5.2244	7.11845	1.89709	6.2226	6.22376	1.34357	3.52695	4.29183	7.54542	5.78895	4.57772	6.22269	-2.20675	(1)	-0.814418	(1)	-0.531229	(1)	1.39233	(1)	1.67552	(1)	0.283189	(1)	-0.285262	(1)	-0.646138	(1)	-0.181034	(1)	-0.360876	(1)	0.104227	(1)	0.465103	(1)
LOC412892	feline leukemia virus subgroup C	2633.4	1496.37	3438.19	2484.57	3533.33	1886.32	2218.06	2583.43	4597.16	4568.59	2860.62	4524.33	3556.85	3347.42	5317.83	264.883	2961.38	279.822	24.7455	4582.88	3692.48	3452.14	5317.83	0.520209	(1)	0.392138	(1)	0.217422	(1)	-0.128071	(1)	-0.302787	(1)	-0.174716	(1)	-0.311665	(1)	-0.408764	(1)	0.214585	(1)	-0.0970992	(1)	0.52625	(1)	0.623349	(1)
nrm (LOC412893)	hypothetical protein LOC412893 isoform 1	179.252	172.863	150.318	212.815	215.723	163.063	168.448	165.405	236.011	200.014	120.715	178.675	166.097	139.436	176.722	176.576	181.567	189.393	166.927	218.125	149.695	152.767	176.722	0.0444511	(1)	0.105333	(1)	-0.0768329	(1)	0.0608822	(1)	-0.121284	(1)	-0.182166	(1)	-0.542385	(1)	-0.513077	(1)	-0.302927	(1)	0.0293082	(1)	0.239458	(1)	0.21015	(1)
LOC100578962	hypothetical protein LOC100578962	0	0	0	0	0	0.964869	0	0.913841	0	0	0	0	0	0.948547	0			0.482435	0.456926			0.474273												-0.0783898	(1)
LOC724336	tRNA dimethylallyltransferase,	811.671	914.573	606.739	665.263	651.517	746.809	590.055	975.982	998.506	1153.38	1772.6	2057.37	1047.6	1334.61	1690.06	863.122	636.976	699.163	783.187	175.944	1914.99	1191.12	169.584	-0.440536	(1)	-0.303937	(1)	-0.140518	(1)	0.136599	(1)	0.300018	(1)	0.163419	(1)	0.83173	(0.051)	0.146694	(1)	0.65147	(1)	-0.685036	(0.219)	-0.18026	(1)	0.504776	(1)
LOC550655	protein FAM49B-like	1485.38	1090.48	1213.48	1781.24	1252.58	1296.78	1412.82	1172.46	1221.41	1165.72	1774.19	1820.18	1332.34	1232.16	1616.63	1287.93	1497.37	1274.68	1292.64	1193.56	1797.19	1282.25	1616.63	0.217367	(1)	-0.0149158	(1)	0.00526608	(1)	-0.232283	(1)	-0.212101	(1)	0.0201818	(1)	0.590466	(0.406)	0.103404	(1)	0.437718	(1)	-0.487062	(0.735)	-0.152748	(1)	0.334314	(1)
LOC100576392	hypothetical protein LOC100576392	19.1337	22.0838	6.37714	10.3812	33.9241	17.3676	5.84213	14.6215	17.1461	21.1468	20.6486	26.122	16.6097	9.48547	18.6678	2.68735	8.37918	25.6459	1.23179	19.1464	23.3853	13.4759	18.6678	-1.29838	(1)	0.315471	(1)	-1.0102	(1)	1.61385	(1)	0.288179	(1)	-1.32567	(1)	0.288526	(1)	-0.553292	(1)	-0.0365237	(1)	-0.841818	(1)	-0.325049	(1)	0.516768	(1)
LOC408344	tRNA dimethylallyltransferase,	290.026	300.796	261.463	222.331	236.599	281.742	260.948	248.565	308.629	256.405	279.55	244.502	215.926	311.123	247.66	295.411	241.897	259.173	254.757	282.517	262.26	263.525	247.66	-0.288334	(1)	-0.188825	(1)	-0.213606	(1)	0.0995088	(1)	0.074728	(1)	-0.0247808	(1)	-0.108628	(1)	-0.100399	(1)	-0.18998	(1)	0.00822915	(1)	-0.0813518	(1)	-0.089581	(1)
LOC412865	hypothetical protein LOC412865	1472.29	1340.26	1318.25	1439.53	1164.73	1322.84	1270.66	1408.23	2320.77	2060.05	1472.4	1687.48	1944.52	1826.9	1702.5	146.273	1378.89	1243.78	1339.45	219.419	1579.94	1885.71	172.536	-0.0283717	(1)	-0.177143	(1)	-0.0702391	(1)	-0.148771	(1)	-0.0418673	(1)	0.106904	(1)	-0.47133	(0.796)	-0.216092	(1)	-0.363544	(1)	0.255238	(1)	0.107786	(1)	-0.147452	(1)
LOC100579004		13.0915	9.89962	9.1102	6.92081	10.4382	5.78921	12.6579	6.39689	18.1547	12.3356	7.94176	13.5834	21.3554	13.2797	12.4452	11.4955	8.15526	8.11372	9.52742	15.2451	1.76263	17.3175	12.4452	-0.52021	(1)	-0.502643	(1)	-0.270918	(1)	0.017567	(1)	0.249292	(1)	0.231725	(1)	-0.502323	(1)	0.183881	(1)	-0.292761	(1)	0.686204	(1)	0.209563	(1)	-0.476641	(1)
LOC409647	THO complex subunit 1-like isoform 1	516.61	474.42	458.243	447.257	432.315	467.961	491.713	443.213	520.434	526.908	628.987	494.228	650.152	626.989	568.746	495.516	452.757	45.1382	467.463	523.677	561.679	638.576	568.746	-0.130214	(1)	-0.138561	(1)	-0.0840775	(1)	-0.00834694	(1)	0.0461367	(1)	0.0544836	(1)	0.100903	(1)	0.286186	(1)	0.119124	(1)	0.185283	(1)	0.0182206	(1)	-0.167062	(1)
lack (LOC412866)	e3 ubiquitin-protein ligase SMURF2	188.316	357.148	194.958	310.571	377.514	224.814	222.001	289.688	227.942	219.398	106.42	244.502	168.47	139.436	153.076	272.732	252.765	31.1644	255.844	223.67	175.468	153.953	153.76	-0.109688	(1)	0.143068	(1)	-0.0922174	(1)	0.252756	(1)	0.0174708	(1)	-0.235285	(1)	-0.350223	(1)	-0.53888	(1)	-0.547124	(1)	-0.188657	(1)	-0.196901	(1)	-0.00824381	(1)
LOC724580	hypothetical protein LOC724580	158.105	244.445	185.848	109.868	280.091	83.9436	237.58	192.82	239.036	384.167	243.018	227.784	344.058	380.367	283.751	21.2747	147.858	182.175	215.222	311.617	235.489	362.213	283.756	-0.444954	(1)	-0.145089	(1)	0.0965141	(1)	0.299865	(1)	0.541468	(1)	0.241603	(1)	-0.404583	(1)	0.217135	(1)	-0.135079	(1)	0.621718	(1)	0.269504	(1)	-0.352214	(1)
Taf12 (LOC410305)	transcription initiation factor TFIID subunit	950.642	881.067	1020.34	946.421	930.738	969.693	884.109	968.672	796.788	889.928	951.423	887.103	793.707	814.802	822.628	915.854	983.381	95.2158	926.393	843.358	919.263	84.2545	822.628	0.102632	(1)	0.0531368	(1)	0.0165018	(1)	-0.0494957	(1)	-0.0861307	(1)	-0.0366351	(1)	0.124333	(1)	-0.068493	(1)	-0.0359052	(1)	-0.192826	(1)	-0.160238	(1)	0.0325878	(1)
LOC408345	zinc finger protein 598-like	1395.75	1379.09	1273.61	1283.81	1359.57	1275.56	1221.01	1233.69	998.506	1068.79	1142.03	1146.23	1119.97	1035.81	1079	1387.42	1278.78	1317.57	1227.35	133.655	1144.13	177.891	178.999	-0.117721	(1)	-0.0745334	(1)	-0.176867	(1)	0.0431879	(1)	-0.0591453	(1)	-0.102333	(1)	0.146502	(1)	0.0604633	(1)	0.061945	(1)	-0.0860385	(1)	-0.0845567	(1)	0.00148177	(1)
LOC410306	ADP-ribosylation factor 2-like	1067.46	1099.62	1061.34	1033.8	1021.2	1106.7	993.162	1067.37	846.209	870.543	1145.2	948.751	864.892	921.988	928.412	183.539	147.567	163.954	13.2643	858.376	146.977	893.44	928.413	-0.0487091	(1)	-0.0263161	(1)	-0.0727369	(1)	0.022393	(1)	-0.0240278	(1)	-0.0464209	(1)	0.286547	(1)	0.0577602	(1)	0.113155	(1)	-0.228787	(1)	-0.173392	(1)	0.055395	(1)
IGFn3-4 (LOC551736)	nephrin	38.2674	38.837	29.1526	46.7155	47.8417	36.665	38.9475	34.726	50.4296	48.4614	46.0622	51.1991	52.202	49.3244	41.0692	38.5522	37.9344	42.2534	36.8367	49.4455	48.6367	5.76323	41.6917	-0.0233196	(1)	0.132253	(1)	-0.065667	(1)	0.155573	(1)	-0.0423474	(1)	-0.19792	(1)	-0.0239732	(1)	0.0379433	(1)	-0.267784	(1)	0.0619165	(1)	-0.243811	(1)	-0.305727	(1)
LOC100578926	hypothetical protein LOC100578926	0	0	0	0.865101	0.869849	0.964869	0	0	0	0	0	0	0	0	2.48904		0.432555	0.917359					2.48944							1.08462	(1)
LOC100578889	hypothetical protein LOC100578889	3.02111	6.09208	1.82204	6.05571	7.82864	1.92974	2.92107	6.39689	10.0859	7.93005	9.53011	13.5834	4.74563	14.2282	14.9342	4.55659	3.93887	4.87919	4.65898	9.79869	11.5568	9.48692	14.9342	-0.210173	(1)	0.0986858	(1)	0.0320575	(1)	0.308858	(1)	0.24223	(1)	-0.0666283	(1)	0.359463	(1)	0.0747348	(1)	0.729347	(1)	-0.284728	(1)	0.369885	(1)	0.654613	(1)
LOC410307	hypothetical protein LOC410307	570.99	795.016	547.523	754.368	781.124	564.448	588.108	697.261	580.949	528.67	319.259	579.909	479.309	452.457	430.604	683.284	65.9455	672.786	642.684	554.896	449.584	465.883	43.6398	-0.0693549	(1)	-0.0217432	(1)	-0.0877814	(1)	0.0476117	(1)	-0.0184265	(1)	-0.0660382	(1)	-0.303403	(1)	-0.252025	(1)	-0.365631	(1)	0.0513778	(1)	-0.062228	(1)	-0.113606	(1)
LOC724954	heat shock protein 67B2-like	82.577	75.3895	77.4367	70.0732	70.4578	75.2598	67.1845	103.264	93.7991	57.2726	120.715	89.8597	119.827	100.546	109.518	78.9832	73.7549	72.8588	85.2243	75.5358	15.2872	11.1867	19.5178	-0.0988067	(1)	-0.116444	(1)	0.109718	(1)	-0.0176368	(1)	0.208525	(1)	0.226162	(1)	0.479097	(1)	0.544716	(1)	0.535932	(1)	0.0656184	(1)	0.0568346	(1)	-0.00878382	(1)
LOC408346	hypothetical protein LOC408346 isoform 1	521.645	516.304	504.705	493.108	487.115	486.294	520.923	516.32	521.442	590.348	914.891	678.127	575.408	600.43	746.712	518.974	498.963	486.747	518.622	555.895	796.595	587.919	746.712	-0.056894	(1)	-0.0926162	(1)	-0.00098006	(1)	-0.0357221	(1)	0.055914	(1)	0.0916361	(1)	0.518878	(0.894)	0.0808047	(1)	0.425739	(1)	-0.438073	(1)	-0.0931386	(1)	0.344934	(1)
LOC724997	hypothetical protein LOC724997	49.3448	60.1593	39.1738	61.4222	64.3688	53.0678	80.8161	66.7104	63.5413	56.3915	41.2972	47.0196	39.1515	49.3244	56.0034	54.7522	5.29813	58.7184	73.7633	59.9664	44.1584	44.238	56.3484	-0.122411	(1)	0.100898	(1)	0.42999	(1)	0.223309	(1)	0.552401	(1)	0.329092	(1)	-0.441467	(1)	-0.438869	(1)	-0.0986396	(1)	0.00259736	(1)	0.342827	(1)	0.34023	(1)
LOC100578343	hypothetical protein LOC100578343	204.428	165.248	204.979	220.601	162.662	182.36	226.869	192.82	179.529	221.16	247.783	234.053	179.148	173.584	163.032	184.838	212.8	172.52	29.8449	2.34487	24.9186	176.366	163.321	0.20317	(1)	-0.099573	(1)	0.183062	(1)	-0.302743	(1)	-0.0201074	(1)	0.282635	(1)	0.266057	(1)	-0.183914	(1)	-0.297329	(1)	-0.449971	(1)	-0.563386	(1)	-0.113415	(1)
nkd (LOC408347)	hypothetical protein LOC408347	900.291	1181.1	818.096	1199.9	1232.58	891.539	875.346	1087.47	889.578	916.362	562.277	937.258	690.49	677.262	628.483	14.696	18.9954	162.574	981.484	92.9699	749.767	683.877	628.483	-0.0446291	(1)	0.0293131	(1)	-0.0846232	(1)	0.0739421	(1)	-0.0399941	(1)	-0.113936	(1)	-0.268235	(1)	-0.400943	(1)	-0.522805	(1)	-0.132708	(1)	-0.25457	(1)	-0.121862	(1)
LOC410308	electron transfer flavoprotein subunit	1693.84	1698.17	1840.26	1602.17	1613.57	1756.06	1762.38	1707.97	940.008	906.669	1218.27	903.822	1015.57	1088.93	1003.08	1696.84	1721.21	1684.82	1735.17	923.339	161.438	152.249	13.8327	0.0212891	(1)	-0.00954617	(1)	0.0329422	(1)	-0.0308353	(1)	0.0116531	(1)	0.0424884	(1)	0.200552	(1)	0.188544	(1)	0.11951	(1)	-0.0120084	(1)	-0.0810428	(1)	-0.0690343	(1)
LOC411364	protein UBASH3A homolog	281.97	245.968	259.641	288.079	262.694	294.285	276.528	269.583	157.34	174.461	189.014	215.245	151.86	173.584	195.39	263.969	273.86	278.49	273.553	165.976	22.1296	162.722	195.39	0.0530686	(1)	0.077256	(1)	0.0488253	(1)	0.0241874	(1)	-0.00424337	(1)	-0.0284308	(1)	0.28496	(1)	-0.0279096	(1)	0.236034	(1)	-0.31287	(1)	-0.0489266	(1)	0.263943	(1)
bs (LOC724322)	hypothetical protein LOC724322	329.301	300.035	306.103	298.46	325.323	311.653	312.554	307.964	363.093	340.992	333.554	306.15	328.635	294.05	334.776	314.668	32.2812	318.489	31.2592	352.427	319.852	311.342	334.776	-0.0579383	(1)	0.0174096	(1)	-0.0203557	(1)	0.075348	(1)	0.0375826	(1)	-0.0377653	(1)	-0.138346	(1)	-0.177249	(1)	-0.0725547	(1)	-0.0389025	(1)	0.0657916	(1)	0.104694	(1)
SMC2 (LOC412832)	structural maintenance of chromosomes protein 2	96.6755	113.465	101.123	87.3752	117.43	139.906	84.7109	74.935	104.894	71.3705	58.769	110.757	92.5399	144.179	94.5835	15.7214	94.2492	128.668	79.8229	88.1323	84.7632	118.359	94.5835	-0.156802	(1)	0.292297	(1)	-0.396479	(1)	0.449099	(1)	-0.239677	(1)	-0.688776	(1)	-0.0562288	(1)	0.425437	(1)	0.101923	(1)	0.481666	(1)	0.158151	(1)	-0.323514	(1)
LOC724179	ribosomal protein S6 kinase delta-1-like	125.88	105.85	112.055	126.305	127.868	125.433	144.106	113.316	114.98	133.93	157.247	165.091	134.064	136.591	116.985	115.865	119.189	126.654	128.712	124.455	161.169	135.327	116.985	0.0407022	(1)	0.12841	(1)	0.151695	(1)	0.0877082	(1)	0.110993	(1)	0.023285	(1)	0.372954	(1)	0.120834	(1)	-0.0892977	(1)	-0.25212	(1)	-0.462252	(1)	-0.210132	(1)
CYP4AZ1 (LOC413833)	cytochrome P450 4C1	854.974	1283.14	493.773	374.589	1105.58	332.88	1186.93	802.352	667.688	652.908	1091.2	553.787	880.315	862.229	847.518	169.588	434.187	719.229	994.639	66.2978	822.492	871.273	847.518	-1.29997	(1)	-0.571818	(1)	-0.104096	(1)	0.728155	(1)	1.19588	(1)	0.467723	(1)	0.316885	(1)	0.400006	(1)	0.360128	(1)	0.0831213	(1)	0.0432424	(1)	-0.0398789	(1)
LOC552535	adenylate cyclase type 9-like	646.517	884.874	724.261	975.834	1001.2	711.108	795.503	945.826	836.123	830.893	632.164	710.519	855.4	760.735	751.69	765.696	85.4731	856.152	87.6645	833.588	671.341	88.6751	751.692	0.150772	(1)	0.161096	(1)	0.185346	(1)	0.0103242	(1)	0.0345737	(1)	0.0242495	(1)	-0.31215	(1)	-0.0447203	(1)	-0.149058	(1)	0.267429	(1)	0.163092	(1)	-0.104338	(1)
Ranbp21 (LOC413344)	exportin-5	298.083	265.005	208.624	311.436	293.139	252.796	251.212	288.774	303.586	299.58	246.195	301.97	204.062	228.6	224.014	281.545	26.2994	272.967	269.993	31.583	274.825	216.331	224.136	-0.114683	(1)	-0.0446322	(1)	-0.0604403	(1)	0.0700508	(1)	0.0542426	(1)	-0.0158081	(1)	-0.137945	(1)	-0.479315	(1)	-0.428969	(1)	-0.34137	(1)	-0.291024	(1)	0.050346	(1)
LOC413343	nucleoporin Nup37-like	116.816	105.85	107.5	86.5101	119.169	119.644	112.948	109.661	113.971	132.168	174.719	155.687	150.674	181.172	138.142	111.333	97.5214	119.465	111.344	123.692	165.229	165.923	138.142	-0.198747	(1)	0.101	(1)	-0.000371139	(1)	0.299747	(1)	0.198376	(1)	-0.101371	(1)	0.424769	(1)	0.431045	(1)	0.166679	(1)	0.00627583	(1)	-0.25809	(1)	-0.264366	(1)
LOC724288	gem-associated protein 5-like	162.133	213.223	174.916	198.973	198.326	202.622	211.29	192.82	184.572	177.986	168.365	225.694	166.097	185.915	181.7	187.678	186.945	2.47417	22.5543	181.279	197.297	176.618	181.7	-0.00564772	(1)	0.0951574	(1)	0.106493	(1)	0.100805	(1)	0.112141	(1)	0.0113358	(1)	0.120202	(1)	-0.0425856	(1)	0.00334627	(1)	-0.162787	(1)	-0.116855	(1)	0.0459319	(1)
LOC552588	lipase 1-like	58.4081	47.2136	54.6612	54.5014	35.6638	59.8219	62.3161	31.0706	58.4983	46.6992	101.655	65.8275	40.3379	60.707	80.8938	52.8185	54.5813	47.7428	46.6933	52.5988	83.75	5.52244	8.89381	0.0475716	(1)	-0.14555	(1)	-0.177618	(1)	-0.193122	(1)	-0.22519	(1)	-0.032068	(1)	0.670905	(1)	-0.0581047	(1)	0.621	(1)	-0.72901	(1)	-0.0499047	(1)	0.679105	(1)
LOC413134	UNC93-like protein-like	52.3659	67.7744	85.6359	133.226	80.8959	54.0327	116.843	64.8827	536.571	477.565	397.088	588.268	583.713	499.884	294.951	6.71244	19.4376	67.4643	9.86266	57.682	492.678	541.799	294.951	0.865298	(1)	0.167477	(1)	0.59704	(1)	-0.697821	(1)	-0.268258	(1)	0.429563	(1)	-0.0415352	(1)	0.0955768	(1)	-0.781703	(1)	0.137112	(1)	-0.740168	(1)	-0.87728	(1)
Hs3st-B (LOC413133)	heparan sulfate glucosamine 3-O-sulfotransferase	192.344	201.8	240.509	200.703	186.148	204.552	215.185	217.494	190.624	214.111	200.132	118.071	143.555	178.327	149.342	197.721	22.6632	195.35	216.34	22.3677	159.119	16.9411	149.342	0.162751	(1)	-0.012662	(1)	0.134575	(1)	-0.175413	(1)	-0.028176	(1)	0.147237	(1)	-0.347028	(1)	-0.330446	(1)	-0.438355	(1)	0.0165817	(1)	-0.0913272	(1)	-0.107909	(1)
Axin (LOC724501)	axin-1	541.786	686.12	566.654	558.855	600.196	511.381	650.424	649.741	560.777	511.929	490.801	543.338	423.548	462.891	441.805	613.953	562.755	555.788	65.8244	536.354	517.693	443.219	441.847	-0.125622	(1)	-0.143593	(1)	0.0824948	(1)	-0.0179713	(1)	0.208116	(1)	0.226088	(1)	-0.0528254	(1)	-0.275162	(1)	-0.279774	(1)	-0.222337	(1)	-0.226949	(1)	-0.00461216	(1)
LOC413816	sodium-independent sulfate anion	1506.53	2106.34	1091.4	551.069	1241.27	1376.87	997.057	1757.32	396.377	402.67	185.837	178.675	296.602	532.135	163.032	186.431	821.235	139.713	1377.19	399.524	182.256	414.368	163.321	-1.13727	(1)	-0.464599	(1)	-0.391418	(1)	0.672676	(1)	0.745856	(1)	0.0731806	(1)	-1.13232	(0.977)	0.0526335	(1)	-1.29312	(1)	1.18495	(0.827)	-0.160809	(1)	-1.34576	(1)
CYP6BD1 (LOC551560)	cytochrome P450 6k1	59.4151	133.264	224.111	291.539	50.4512	99.3815	259.001	191.907	1667.2	2155.21	1061.02	1079.36	2739.42	1456.02	914.722	96.3397	257.825	74.9164	225.454	1911.27	17.1928	297.718	914.722	1.42019	(1)	-0.362849	(1)	1.22663	(1)	-1.78304	(1)	-0.19356	(1)	1.58948	(1)	-0.836617	(1)	0.134337	(1)	-1.06308	(1)	0.970954	(1)	-0.226462	(1)	-1.19742	(1)
RpL32 (LOC406099)	60S ribosomal protein L32	6642.41	5970.24	6162.14	6262.47	5810.59	6419.27	6450.69	5562.55	4747.44	5057.61	7740.04	5778.19	5860.86	6227.21	6354.52	636.324	6212.32	6114.93	66.6182	492.527	6759.11	644.339	6354.53	-0.0216713	(1)	-0.0444628	(1)	-0.0702463	(1)	-0.0227915	(1)	-0.048575	(1)	-0.0257835	(1)	0.463308	(0.873)	0.301986	(1)	0.374258	(1)	-0.161322	(1)	-0.0890509	(1)	0.0722714	(1)
LOC409385	e3 ubiquitin-protein ligase HECW2-like	591.13	696.781	618.582	747.447	706.317	611.727	649.45	700.916	595.069	592.111	589.279	632.153	542.189	551.106	552.567	643.956	683.148	659.221	675.183	593.59	61.7156	546.647	552.567	0.0849552	(1)	0.0333651	(1)	0.0683171	(1)	-0.05159	(1)	-0.016638	(1)	0.034952	(1)	0.041034	(1)	-0.118857	(1)	-0.103317	(1)	-0.159891	(1)	-0.144351	(1)	0.0155393	(1)
Khc (LOC411769)	kinesin heavy chain isoform 1	2488.39	3209.76	2368.65	2900.68	3139.28	2516.38	2436.17	2915.15	2307.66	2404.57	2085.51	2719.82	2136.72	1904.68	2128.13	2849.75	2634.67	2827.83	2675.67	2356.11	242.665	22.7189	2128.13	-0.112873	(1)	-0.0107975	(1)	-0.0905984	(1)	0.102075	(1)	0.0222743	(1)	-0.0798009	(1)	0.0282265	(1)	-0.221553	(1)	-0.146823	(1)	-0.249779	(1)	-0.17505	(1)	0.0747295	(1)
LOC100578581	hypothetical protein LOC100578581	93.6544	89.8581	106.589	100.352	101.772	102.276	93.4741	78.5903	106.911	115.426	119.126	100.309	106.777	144.179	110.762	91.7563	13.4751	12.2422	86.3221	111.169	19.7175	125.478	11.7623	0.173341	(1)	0.153033	(1)	-0.0929297	(1)	-0.0203081	(1)	-0.266271	(1)	-0.245963	(1)	-0.0189555	(1)	0.174685	(1)	-0.00528172	(1)	0.193641	(1)	0.0136738	(1)	-0.179967	(1)
LOC724770	hypothetical protein LOC724770	253.773	238.353	184.937	222.331	230.51	219.99	246.343	248.565	208.779	188.559	181.072	208.976	188.639	179.275	194.145	246.628	23.634	225.254	247.454	198.669	195.241	183.957	194.145	-0.273048	(1)	-0.127499	(1)	0.00813338	(1)	0.145549	(1)	0.281182	(1)	0.135633	(1)	-0.0267129	(1)	-0.110996	(1)	-0.0332296	(1)	-0.0842827	(1)	-0.00651677	(1)	0.0777659	(1)
LOC550794	26S protease regulatory subunit 8 isoform 1	2159.09	2142.13	2361.36	2080.57	2071.98	2131.4	2144.06	2270.9	2297.57	2238.04	2684.31	2110.66	2444	2396.98	2355.88	215.664	222.966	211.688	227.478	2267.85	2397.49	242.49	2355.88	0.0464436	(1)	-0.0331951	(1)	0.0376559	(1)	-0.0796386	(1)	-0.00878762	(1)	0.070851	(1)	0.0802262	(1)	0.0940023	(1)	0.0549675	(1)	0.0137761	(1)	-0.0252587	(1)	-0.0390349	(1)
LOC408348	putative rRNA methyltransferase 3-like isoform	548.835	549.81	512.904	523.386	598.456	579.886	542.344	518.148	534.554	576.25	393.911	537.069	409.311	503.678	526.432	549.322	518.145	589.171	53.2462	555.421	465.49	456.495	526.432	-0.0842969	(1)	0.101034	(1)	-0.0509908	(1)	0.185331	(1)	0.0333061	(1)	-0.152024	(1)	-0.254783	(1)	-0.282935	(1)	-0.0772855	(1)	-0.028152	(1)	0.177497	(1)	0.205649	(1)
LOC100576824	hypothetical protein LOC100576824 (>1 isoforms)	1.00704	0.76151	0.91102	2.5953	1.7397	0	1.94738	0.913841	3.02578	0.881117	1.58835	2.08976	5.93204	0	4.97808	0.884273	1.75316	0.869849	1.43689	1.95345	1.83956	2.96629	4.97887	0.987395	(1)	-0.0237271	(1)	0.694066	(1)	-1.01112	(1)	-0.293329	(1)	0.717793	(1)	-0.0870562	(1)	0.602507	(1)	1.34957	(1)	0.689563	(1)	1.43662	(1)	0.747061	(1)
LOC100578610	hypothetical protein LOC100578610	3.02111	2.28453	7.28816	5.19061	0.869849	1.92974	5.84213	4.56921	2.01718	1.76223	7.94176	0	36.7787	2.84564	3.73356	2.65282	6.23938	1.39979	5.25668	1.8898	3.9788	19.8121	3.73357	1.23388	(1)	-0.922312	(1)	0.972557	(1)	-2.15619	(1)	-0.26132	(1)	1.89487	(1)	1.07129	(1)	3.39015	(1)	0.982388	(1)	2.31885	(1)	-0.0889066	(1)	-2.40776	(1)
LOC100576913		36.2533	37.314	47.373	33.7389	38.2733	44.384	22.3948	23.7599	26.2234	24.6713	34.9437	31.3464	32.033	18.9709	42.3137	36.7836	4.55598	41.3287	23.7736	25.4473	33.1458	25.5198	42.3137	0.14085	(1)	0.168078	(1)	-0.672587	(1)	0.0272279	(1)	-0.813437	(1)	-0.840665	(1)	0.38128	(1)	0.00309479	(1)	0.73361	(1)	-0.378185	(1)	0.35233	(1)	0.730515	(1)
E75 (LOC410309)	ecdysone-induced protein 75	3076.5	3795.36	3216.81	3620.45	2806.13	2502.87	3606.54	3504.58	4308.71	4458.45	2905.1	3162.85	2945.85	2929.11	2711.81	3435.94	3418.63	2654.51	3555.56	4383.58	333.974	2937.48	2711.89	-0.00728273	(1)	-0.37226	(1)	0.0493766	(1)	-0.364977	(1)	0.0566594	(1)	0.421636	(1)	-0.5309	(0.442)	-0.577529	(0.371)	-0.692853	(0.567)	-0.0466287	(1)	-0.161953	(1)	-0.115324	(1)
LOC724955	hypothetical protein LOC724955	652.56	692.974	569.387	662.667	699.358	739.09	601.739	590.341	517.408	545.411	395.5	620.659	441.344	433.486	496.564	672.767	616.274	719.225	596.439	531.496	58.7936	437.415	496.564	-0.127112	(1)	0.0963351	(1)	-0.174696	(1)	0.223447	(1)	-0.0475843	(1)	-0.271031	(1)	-0.0647705	(1)	-0.280822	(1)	-0.0978458	(1)	-0.216051	(1)	-0.0330753	(1)	0.182976	(1)
LOC551324	transmembrane protein 19-like	260.822	261.959	255.086	258.665	259.215	247.006	286.264	265.928	252.148	251.999	258.901	253.906	261.01	261.799	281.262	261.399	256.875	253.117	276.967	252.737	256.437	261.444	281.262	-0.0251402	(1)	-0.0464402	(1)	0.0789616	(1)	-0.0212999	(1)	0.104102	(1)	0.125402	(1)	0.024571	(1)	0.0524376	(1)	0.158067	(1)	0.0278665	(1)	0.133496	(1)	0.105629	(1)
Dh31-R1 (LOC412591)	calcitonin receptor	132.929	105.088	440.934	438.606	113.95	197.798	503.397	184.596	256.182	185.035	649.636	111.802	246.773	267.49	207.835	119.857	439.77	155.874	343.996	22.6849	38.7197	257.132	27.8349	1.88568	(1)	0.389316	(1)	1.53133	(1)	-1.49637	(1)	-0.354355	(1)	1.14201	(1)	0.787239	(1)	0.221019	(1)	-0.0860505	(1)	-0.56622	(1)	-0.873289	(1)	-0.307069	(1)
LOC409171	esterase FE4-like	10603.1	11637.4	12098.3	10520.5	9760.57	11281.2	9715.46	12890.6	11354.7	11195.5	17521.1	10007.9	11687.3	10590.5	11152.1	1112.24	1139.42	152.911	1133.53	11275.2	13764.5	11138.9	11152.1	0.024337	(1)	-0.079928	(1)	0.0235248	(1)	-0.104265	(1)	-0.000812175	(1)	0.103453	(1)	0.287811	(1)	-0.0175313	(1)	-0.0158191	(1)	-0.305342	(1)	-0.30363	(1)	0.00171226	(1)
LOC100577014	hypothetical protein LOC100577014 (>1 isoforms)	7946.52	6744.69	7122.35	7108.54	6489.94	6770.49	6719.42	6848.33	4965.3	4022.3	5513.17	4614.19	3893.79	4407.9	5103.78	7345.68	7115.44	663.214	6783.87	4493.8	563.688	415.845	513.777	-0.0459281	(1)	-0.147826	(1)	-0.114772	(1)	-0.101898	(1)	-0.0688442	(1)	0.033054	(1)	0.172251	(1)	-0.114531	(1)	0.18363	(1)	-0.286781	(1)	0.0113789	(1)	0.29816	(1)
LOC727593	UDP-glucuronosyltransferase 2C1-like	1626.36	1854.28	2297.59	2204.28	1791.89	1191.61	2267.72	2246.22	3388.87	4987.12	3702.45	3084.49	4923.59	4682.98	3027.92	174.32	225.935	1491.76	2256.98	4188	3393.47	483.285	327.918	0.371172	(1)	-0.222346	(1)	0.375035	(1)	-0.593517	(1)	0.00386367	(1)	0.597381	(1)	-0.3035	(1)	0.197762	(1)	-0.467934	(1)	0.501261	(0.946)	-0.164434	(1)	-0.665696	(1)
LOC409304	UDP-glucuronosyltransferase 1-10-like	33.2322	42.6445	34.6187	34.604	26.0955	50.1732	25.3159	31.9844	50.4296	51.1048	38.1204	38.6606	79.4894	45.5303	36.0911	37.9384	34.6114	38.1343	28.6517	5.76719	38.3951	62.5985	36.9185	-0.132411	(1)	0.00743257	(1)	-0.405114	(1)	0.139843	(1)	-0.272703	(1)	-0.412547	(1)	-0.403147	(1)	0.300186	(1)	-0.492254	(1)	0.703333	(1)	-0.0891072	(1)	-0.79244	(1)
LOC409203	UDP-glucuronosyltransferase 1-10-like	49108.1	50124.1	43704.3	40354.4	44088.3	53326.4	38684.6	44454.7	14926.2	11481.8	11108.9	12152	13393.4	16836.7	13737	49616.2	4229.36	4877.34	41569.7	1323.99	1163.45	15115.4	13737.1	-0.239411	(1)	-0.0266695	(1)	-0.255277	(1)	0.212742	(1)	-0.0158659	(1)	-0.228608	(1)	-0.183068	(1)	0.19501	(1)	0.0570939	(1)	0.378078	(0.946)	0.240162	(1)	-0.137916	(1)
LOC100578640	hypothetical protein LOC100578640	49.3448	85.2891	41.9069	89.1054	100.902	60.7867	55.5002	67.6242	99.8506	59.9159	39.7088	83.5904	68.8117	68.2954	62.226	67.3169	65.5616	8.84468	61.5622	79.8833	61.6496	68.5535	62.2269	-0.0393389	(1)	0.264182	(1)	-0.128924	(1)	0.303521	(1)	-0.0895848	(1)	-0.393106	(1)	-0.373802	(1)	-0.220663	(1)	-0.360376	(1)	0.153139	(1)	0.0134258	(1)	-0.139713	(1)
LOC552226	RISC-loading complex subunit tarbp2-like	44.3096	88.3351	46.462	94.296	89.5944	57.8921	52.5792	83.1595	98.842	66.0838	65.1224	86.7251	90.167	80.6265	60.9815	66.3224	7.37987	73.7433	67.8694	82.4629	75.9238	85.3968	6.98149	0.0856499	(1)	0.153016	(1)	0.033265	(1)	0.0673665	(1)	-0.0523848	(1)	-0.119751	(1)	-0.119194	(1)	0.0504361	(1)	-0.435374	(1)	0.16963	(1)	-0.31618	(1)	-0.48581	(1)
LOC100577699	5-formyltetrahydrofolate cyclo-ligase-like	258.808	242.16	264.196	228.387	266.174	280.777	224.922	293.343	382.256	353.328	355.791	305.105	380.837	356.654	316.108	25.4843	246.291	273.475	259.133	367.792	33.448	368.745	316.181	-0.0243546	(1)	0.126691	(1)	0.0489704	(1)	0.151046	(1)	0.073325	(1)	-0.0777206	(1)	-0.154468	(1)	0.00373418	(1)	-0.218473	(1)	0.158202	(1)	-0.064005	(1)	-0.222207	(1)
tra2 (LOC725195)	transformer-2 protein homolog beta	958.699	816.338	826.295	722.359	795.912	858.733	784.793	815.146	1118.53	1080.25	1242.09	1097.12	1222	1107.9	1178.56	887.518	774.327	827.323	799.97	199.389	1169.68	1164.95	1178.57	-0.196834	(1)	-0.101327	(1)	-0.149832	(1)	0.0955068	(1)	0.0470019	(1)	-0.0485048	(1)	0.0893229	(1)	0.0835682	(1)	0.100324	(1)	-0.00575475	(1)	0.0110011	(1)	0.0167558	(1)
LOC725287	sulfhydryl oxidase 1-like	636.447	793.493	697.841	662.667	701.098	653.216	629.976	709.141	366.119	489.901	355.791	401.234	301.348	375.625	354.688	714.971	68.2542	677.157	669.559	428.997	378.512	338.486	354.688	-0.0718087	(1)	-0.0783918	(1)	-0.0946725	(1)	-0.00658314	(1)	-0.0228638	(1)	-0.0162807	(1)	-0.177304	(1)	-0.338548	(1)	-0.271093	(1)	-0.161244	(1)	-0.0937892	(1)	0.0674548	(1)
LOC725183	probable palmitoyltransferase ZDHHC24-like	104.732	95.1887	112.055	102.947	120.039	99.3815	97.3688	133.421	96.8249	107.496	122.303	124.341	123.386	103.392	124.452	99.9624	17.5122	19.7133	115.395	12.1655	123.322	113.389	124.452	0.104927	(1)	0.134273	(1)	0.207152	(1)	0.0293462	(1)	0.102225	(1)	0.0728792	(1)	0.271591	(1)	0.150443	(1)	0.284751	(1)	-0.121148	(1)	0.0131602	(1)	0.134308	(1)
LOC725323		23.1618	27.4143	31.8857	40.6597	53.9306	43.4191	34.0791	68.5381	60.5155	51.1048	25.4136	47.0196	52.202	41.7361	47.2918	25.2889	36.2727	48.6749	51.3859	55.8116	36.2166	46.9692	47.2918	0.520427	(1)	0.944719	(1)	1.02074	(1)	0.424292	(1)	0.500315	(1)	0.0760233	(1)	-0.623876	(1)	-0.248818	(1)	-0.238939	(1)	0.375057	(1)	0.384937	(1)	0.0098797	(1)
LOC725351	aldose 1-epimerase-like	9.06333	5.33057	5.46612	3.4604	10.4382	6.75408	7.78951	6.39689	4.03437	2.64335	4.76506	7.31416	4.74563	1.89709	11.2007	7.19695	4.46326	8.59613	7.93197	3.33886	6.39694	3.32136	11.2682	-0.689287	(1)	0.256303	(1)	-0.020949	(1)	0.94559	(1)	0.668338	(1)	-0.277252	(1)	0.8551	(1)	-0.00757981	(1)	1.74616	(1)	-0.86268	(1)	0.891059	(1)	1.75374	(1)
MAPKKK9 (LOC411566)	hypothetical protein LOC411566	1491.42	1626.58	1444.88	1586.6	1517.02	1524.49	1439.11	1472.2	1378.75	1353.4	1119.79	1459.7	1133.02	1157.23	1220.87	1559.27	1515.74	152.755	1455.65	1366.75	1289.74	1145.12	122.874	-0.0406047	(1)	-0.035836	(1)	-0.0989553	(1)	0.00476874	(1)	-0.0583506	(1)	-0.0631193	(1)	-0.0829483	(1)	-0.254529	(1)	-0.162117	(1)	-0.17158	(1)	-0.079169	(1)	0.0924114	(1)
pcx (LOC552309)	pecanex	2301.08	2857.95	2097.17	3088.41	3105.36	2464.28	2131.4	2654.71	2262.27	2175.48	1763.07	2599.66	2387.05	2028.94	2115.68	2579.51	2592.79	2784.82	2393.56	2218.87	2181.37	227.998	2115.68	0.00740672	(1)	0.110485	(1)	-0.108244	(1)	0.103078	(1)	-0.115651	(1)	-0.218729	(1)	-0.0245961	(1)	-0.00708968	(1)	-0.068704	(1)	0.0175064	(1)	-0.0441078	(1)	-0.0616143	(1)
LOC100578002	thioredoxin, mitochondrial-like	113.795	150.779	149.407	163.504	178.319	187.185	107.106	170.888	104.894	111.021	90.5361	138.969	98.4719	111.929	90.85	132.288	156.456	182.752	138.998	17.9572	114.753	15.2213	9.84997	0.242082	(1)	0.466214	(1)	0.0713824	(1)	0.224132	(1)	-0.1707	(1)	-0.394832	(1)	0.0880677	(1)	-0.0373213	(1)	-0.248901	(1)	-0.125389	(1)	-0.336969	(1)	-0.21158	(1)
LOC727405	hypothetical protein LOC727405	55.387	62.4438	84.7248	77.8591	69.5879	73.33	47.7107	69.4519	54.464	58.1537	69.8875	74.1865	66.4389	70.1925	79.6493	58.9154	81.292	71.459	58.5813	56.3885	72.37	68.3157	79.6493	0.464468	(1)	0.278471	(1)	-0.00820379	(1)	-0.185997	(1)	-0.472672	(1)	-0.286674	(1)	0.355376	(1)	0.278855	(1)	0.5003	(1)	-0.0765215	(1)	0.144923	(1)	0.221445	(1)
LOC727407	cohesin subunit SA-1-like	627.384	657.944	602.184	656.612	682.831	656.111	674.766	675.329	672.731	624.712	503.508	649.916	621.678	700.976	616.037	642.664	629.398	669.471	675.473	648.721	576.712	661.328	616.375	-0.0300924	(1)	0.0589572	(1)	0.070924	(1)	0.0890496	(1)	0.101016	(1)	0.0119668	(1)	-0.169749	(1)	0.0277649	(1)	-0.0745809	(1)	0.197514	(1)	0.0951681	(1)	-0.102346	(1)
LOC409531	NECAP-like protein CG9132-like	589.116	577.986	604.917	564.046	593.237	502.697	576.424	578.461	566.829	644.978	409.795	509.902	479.309	532.135	433.093	583.551	584.481	547.967	577.442	65.9318	459.848	55.7219	433.932	0.00229844	(1)	-0.0907703	(1)	-0.0151816	(1)	-0.0930687	(1)	-0.0174801	(1)	0.0755886	(1)	-0.39793	(1)	-0.260743	(1)	-0.48441	(1)	0.137186	(1)	-0.0864808	(1)	-0.223667	(1)
LOC552612	hypothetical protein LOC552612	1574	1499.41	1613.42	1615.14	1325.65	1528.35	1576.4	1456.66	1744.86	1740.21	2131.57	1824.36	2190.11	2032.74	1864.29	1536.75	1614.28	1427.2	1516.53	1742.54	1977.96	2111.42	1864.29	0.0710502	(1)	-0.106854	(1)	-0.0190644	(1)	-0.177904	(1)	-0.0901146	(1)	0.0877896	(1)	0.182829	(1)	0.277028	(1)	0.0974395	(1)	0.0941988	(1)	-0.0853895	(1)	-0.179588	(1)
LOC552626	RNA (guanine-9-)-methyltransferase	181.267	195.708	241.42	228.387	204.414	212.271	243.422	210.183	201.718	220.279	241.429	230.919	244.4	222.909	206.59	188.487	234.934	28.3428	226.828	21.9988	236.174	233.654	26.5936	0.317601	(1)	0.144492	(1)	0.266971	(1)	-0.173108	(1)	-0.0506296	(1)	0.122479	(1)	0.162615	(1)	0.147141	(1)	-0.0304621	(1)	-0.0154746	(1)	-0.193077	(1)	-0.177603	(1)
LOC409518	hypothetical protein LOC409518	3394.72	3723.78	3393.55	3371.3	3255.84	3276.7	3417.65	3201.19	2577.96	2132.3	2646.19	2887	2677.72	2986.97	2455.44	3559.26	3382.42	3266.27	339.416	2355.13	2766.6	2832.35	2455.44	-0.0735163	(1)	-0.12393	(1)	-0.104997	(1)	-0.0504134	(1)	-0.0314808	(1)	0.0189326	(1)	0.232306	(1)	0.266191	(1)	0.0601725	(1)	0.0338852	(1)	-0.172133	(1)	-0.206018	(1)
LOC406097	LOW QUALITY PROTEIN: integrin beta-PS	1963.72	2059.88	1756.45	1917.93	1954.55	1675.01	1877.27	1809.41	1675.27	1618.61	1636	1733.46	1620.63	1555.62	1772.2	211.823	1837.19	1814.78	1843.34	1646.94	1684.73	1588.13	1772.2	-0.13099	(1)	-0.148693	(1)	-0.126168	(1)	-0.017703	(1)	0.00482201	(1)	0.022525	(1)	0.0327276	(1)	-0.0524647	(1)	0.105749	(1)	-0.0851922	(1)	0.0730218	(1)	0.158214	(1)
LOC550835	ATP-dependent RNA helicase p62-like isoform 1	7654.48	7637.94	7384.73	7313.56	7938.24	7436.25	7224.77	6955.24	6669.82	7164.36	7308.01	6650.66	6423.21	6822.9	7211.99	7646.21	7349.14	7687.24	79.6264	6917.97	6979.34	6623.56	7211.99	-0.0571689	(1)	0.00772098	(1)	-0.108958	(1)	0.0648899	(1)	-0.0517895	(1)	-0.116679	(1)	0.0129243	(1)	-0.0626683	(1)	0.0602329	(1)	-0.0755926	(1)	0.0473086	(1)	0.122901	(1)
LOC727424	mitochondrial thiamine pyrophosphate	95.6685	95.9502	123.899	113.328	114.82	126.398	105.158	137.99	161.375	127.762	141.363	143.149	139.996	130.899	129.43	95.8934	118.613	12.6895	121.574	144.568	142.256	135.448	129.44	0.30803	(1)	0.332099	(1)	0.343599	(1)	0.0240692	(1)	0.0355691	(1)	0.0114999	(1)	-0.0232625	(1)	-0.0940145	(1)	-0.159579	(1)	-0.0707519	(1)	-0.136316	(1)	-0.0655641	(1)
LOC727428	glyoxylate reductase/hydroxypyruvate	553.87	520.873	493.773	462.829	470.588	564.448	457.634	460.576	478.073	503.118	606.75	498.408	545.748	527.392	515.231	537.371	478.387	517.518	459.147	49.5952	552.579	536.57	515.231	-0.168001	(1)	-0.0543094	(1)	-0.227096	(1)	0.113691	(1)	-0.0590951	(1)	-0.172787	(1)	0.171648	(1)	0.129233	(1)	0.0706872	(1)	-0.042415	(1)	-0.100961	(1)	-0.0585459	(1)
Nmdmc (LOC551667)	bifunctional methylenetetrahydrofolate	84.5911	106.611	93.835	100.352	92.204	102.276	84.7109	97.781	115.988	109.258	90.5361	95.0841	94.9127	135.642	105.784	95.6122	97.9337	97.2448	91.2459	112.623	92.8189	115.277	15.7842	0.0223441	(1)	0.0245218	(1)	-0.0672683	(1)	0.00217775	(1)	-0.0896124	(1)	-0.0917902	(1)	-0.279152	(1)	0.0336049	(1)	-0.0903809	(1)	0.312757	(1)	0.188771	(1)	-0.123986	(1)
LOC100577084	hypothetical protein LOC100577084	4.02815	6.09208	0	5.19061	3.4794	1.92974	1.94738	1.82768	5.04296	5.2867	0	7.31416	7.11845	10.434	3.73356	5.61113	2.59533	2.74567	1.88753	5.16483	3.65781	8.77623	3.73357	-0.963266	(1)	-0.903772	(1)	-1.42267	(1)	0.0594944	(1)	-0.459404	(1)	-0.518898	(1)	-0.498028	(1)	0.764881	(1)	-0.468169	(1)	1.26291	(1)	0.0298594	(1)	-1.23305	(1)
LOC413109	hypothetical protein LOC413109	102.718	99.7578	59.2163	71.8034	49.5814	109.03	31.158	60.3135	209.787	110.14	50.8273	217.335	153.047	209.629	190.412	11.2377	65.5983	79.3579	45.7358	159.963	134.812	181.338	19.4116	-0.627964	(1)	-0.352249	(1)	-1.14635	(1)	0.275715	(1)	-0.518389	(1)	-0.794103	(1)	-0.254635	(1)	0.180938	(1)	0.251379	(1)	0.435573	(1)	0.506014	(1)	0.0704418	(1)
LOC100577879	carbonic anhydrase-related protein 10-like	179.252	197.231	225.022	177.346	163.532	170.782	223.948	194.648	363.093	316.321	370.086	839.039	565.917	1048.14	1166.12	188.242	21.1838	167.157	29.2982	339.777	64.5625	87.3551	1166.12	0.0959275	(1)	-0.171385	(1)	0.152974	(1)	-0.267313	(1)	0.0570461	(1)	0.324359	(1)	0.8316	(1)	1.24833	(1)	1.77935	(1)	0.416732	(1)	0.947747	(1)	0.531015	(1)
LOC100577858		0	0	3.64408	0	0	0	0	3.65536	0	0	0	0	0	0	0		1.82239		1.82768													0.0044611	(1)
LOC100577952		0	0	10.0212	0	0	0	0	4.56921	0	0	0	0	0	0	0		5.16833		2.28463													-1.13304	(1)
LOC551113	delta-1-pyrroline-5-carboxylate dehydrogenase,	376.632	392.939	350.743	320.952	487.115	279.812	462.502	291.515	373.179	395.621	308.14	295.701	552.866	360.448	332.287	384.785	335.848	383.464	377.865	384.429	31.9272	456.658	332.287	-0.196247	(1)	-0.00496368	(1)	-0.029456	(1)	0.191284	(1)	0.166791	(1)	-0.0244923	(1)	-0.34844	(1)	0.248502	(1)	-0.21018	(1)	0.596941	(1)	0.13826	(1)	-0.458682	(1)
LOC413108	pre-mRNA-processing factor 40 homolog A-like	728.087	677.744	646.824	641.04	594.107	671.549	701.056	607.704	575.906	584.18	636.929	602.896	506.596	601.379	592.392	72.9154	643.932	632.828	654.38	58.4332	619.913	553.988	592.392	-0.126443	(1)	-0.151538	(1)	-0.103223	(1)	-0.0250952	(1)	0.0232204	(1)	0.0483156	(1)	0.0959041	(1)	-0.0663071	(1)	0.0303906	(1)	-0.162211	(1)	-0.0655135	(1)	0.0966977	(1)
LOC725689	golgin subfamily A member 4-like	94.6614	156.109	99.3011	154.853	185.278	109.995	134.369	157.181	112.962	86.3495	49.2389	146.283	85.4214	65.4497	62.226	125.385	127.771	147.636	145.775	99.6559	97.7618	75.4356	62.2269	0.0193344	(1)	0.235679	(1)	0.217372	(1)	0.216345	(1)	0.198037	(1)	-0.0183071	(1)	-0.0276948	(1)	-0.40171	(1)	-0.679437	(1)	-0.374015	(1)	-0.651743	(1)	-0.277727	(1)
LOC725751	hypothetical protein LOC725751	443.096	400.554	494.684	431.685	374.035	424.542	467.37	424.022	377.213	417.649	419.325	425.266	425.921	478.068	449.272	421.825	463.185	399.289	445.696	397.431	422.296	451.994	449.272	0.134942	(1)	-0.0792125	(1)	0.0794164	(1)	-0.214155	(1)	-0.055526	(1)	0.158629	(1)	0.0875473	(1)	0.185598	(1)	0.176882	(1)	0.0980507	(1)	0.0893352	(1)	-0.00871552	(1)
LOC725821	hypothetical protein LOC725821	36.2533	40.36	50.1061	42.39	39.1432	50.1732	49.6581	49.3474	59.5069	58.1537	50.8273	57.4684	69.9981	51.2215	53.5144	38.3666	46.2482	44.6582	49.5276	58.8333	54.1478	6.69812	53.5144	0.271796	(1)	0.22133	(1)	0.369914	(1)	-0.0504666	(1)	0.0981176	(1)	0.148584	(1)	-0.119656	(1)	0.0429913	(1)	-0.136634	(1)	0.162648	(1)	-0.0169776	(1)	-0.179625	(1)
LOC552833	pre-mRNA-splicing regulator WTAP-like	911.368	901.627	762.523	763.019	800.261	820.139	806.214	799.611	928.913	955.131	900.596	812.917	894.552	880.252	857.474	96.4977	762.771	81.1999	82.9125	942.225	856.756	887.418	857.474	-0.249053	(1)	-0.162026	(1)	-0.175061	(1)	0.0870272	(1)	0.0739922	(1)	-0.013035	(1)	-0.136876	(1)	-0.0861735	(1)	-0.135667	(1)	0.0507025	(1)	0.00120879	(1)	-0.0494937	(1)
Sod2 (LOC410082)	superoxide dismutase 2, mitochondrial	1199.38	1015.09	1159.73	1084.84	1135.15	1164.6	1027.24	1058.23	1196.19	1112.85	1115.02	1021.89	1111.66	1237.85	959.525	117.236	1122.28	1149.87	142.735	1154.52	168.459	1174.76	959.526	0.0194725	(1)	0.0545136	(1)	-0.0865912	(1)	0.0350411	(1)	-0.106064	(1)	-0.141105	(1)	-0.111763	(1)	0.0250713	(1)	-0.266901	(1)	0.136835	(1)	-0.155138	(1)	-0.291973	(1)
kinesin-3B (LOC413837)	kinesin 3B isoform 1	460.216	661.752	396.294	598.65	678.482	459.278	445.949	530.942	690.886	522.502	462.21	660.364	545.748	442.971	526.432	56.9837	497.472	568.88	488.445	66.694	561.287	494.36	526.432	-0.173344	(1)	0.0201651	(1)	-0.199761	(1)	0.193509	(1)	-0.026417	(1)	-0.219927	(1)	-0.112229	(1)	-0.295408	(1)	-0.204722	(1)	-0.183179	(1)	-0.0924924	(1)	0.0906864	(1)
LOC725887	exportin-4-like	161.126	178.955	224.111	195.513	210.503	197.798	201.553	185.51	227.942	263.454	227.134	258.085	240.841	246.622	215.302	17.4293	29.8118	24.1579	193.532	245.698	242.699	243.732	215.32	0.303219	(1)	0.263758	(1)	0.186693	(1)	-0.039461	(1)	-0.116527	(1)	-0.0770658	(1)	-0.0182471	(1)	-0.0115925	(1)	-0.190524	(1)	0.00665458	(1)	-0.172277	(1)	-0.178931	(1)
LOC552828	protein FRG1-like	173.21	211.7	206.801	210.22	198.326	184.29	228.817	189.165	217.856	258.167	298.61	311.374	244.4	251.365	272.55	192.455	28.5151	191.378	28.9994	238.116	34.9923	247.883	272.55	0.115599	(1)	-0.00862551	(1)	0.118919	(1)	-0.124225	(1)	0.00332029	(1)	0.127545	(1)	0.357741	(1)	0.0586248	(1)	0.195489	(1)	-0.299116	(1)	-0.162252	(1)	0.136864	(1)
LOC412172	SHC-transforming protein 1-like	479.349	457.667	432.734	391.891	418.397	438.051	454.712	450.524	373.179	397.384	346.261	366.753	438.971	421.155	368.378	468.584	412.313	428.224	452.619	385.281	356.569	43.6296	368.378	-0.184336	(1)	-0.129709	(1)	-0.0497804	(1)	0.054627	(1)	0.134556	(1)	0.0799288	(1)	-0.111983	(1)	0.158635	(1)	-0.0647258	(1)	0.270618	(1)	0.0472569	(1)	-0.223361	(1)
mus81 (LOC725951)	crossover junction endonuclease MUS81	113.795	102.042	134.831	118.519	120.039	145.695	122.685	137.99	150.28	153.314	184.249	156.732	164.911	176.43	180.455	17.9187	126.675	132.867	13.3374	151.797	17.4944	17.6724	18.4554	0.231186	(1)	0.30004	(1)	0.272306	(1)	0.0688544	(1)	0.0411204	(1)	-0.027734	(1)	0.167545	(1)	0.169066	(1)	0.249497	(1)	0.00152065	(1)	0.0819517	(1)	0.080431	(1)
LOC100577309	hypothetical protein LOC100577309	12.0844	6.85359	7.28816	11.2463	13.0477	7.71895	10.7106	12.7938	7.06015	16.7412	11.1185	13.5834	15.4233	22.7651	11.2007	9.46912	9.26724	1.38334	11.7522	11.9683	12.3595	19.9422	11.2682	-0.0310748	(1)	0.132985	(1)	0.311642	(1)	0.16406	(1)	0.342717	(1)	0.178657	(1)	0.0535782	(1)	0.682091	(1)	-0.0874578	(1)	0.628513	(1)	-0.141036	(1)	-0.769549	(1)
LOC100576704	hypothetical protein LOC100576704	0	0.76151	0	0	0	0	0	0	0	0.881117	0	0	0	0.948547	0	0.387548				0.445584		0.474273																0.106386	(1)
LOC100577345	hypothetical protein LOC100577345	0	0	0	0.865101	0	0	0	0	0	0.881117	0	0	0	0.948547	0		0.432555			0.445584		0.474273																0.106386	(1)
LOC100577371	hypothetical protein LOC100577371	0	0	0	0	0	0	0	0.913841	0	0	0	1.04488	0	0.948547	0				0.456926		0.522443	0.474273																				-0.139547	(1)
LOC413668	run domain Beclin-1 interacting and cystein-rich	313.188	267.29	293.348	269.912	263.564	263.409	279.449	289.688	276.354	297.818	311.317	309.285	282.365	279.821	299.929	29.24	281.63	263.487	284.569	287.859	31.3792	281.933	299.929	-0.0434412	(1)	-0.139512	(1)	-0.0284679	(1)	-0.0960704	(1)	0.0149733	(1)	0.111044	(1)	0.112185	(1)	-0.0304335	(1)	0.0631404	(1)	-0.142619	(1)	-0.0490446	(1)	0.0935739	(1)
CycB3 (LOC413667)	g2/mitotic-specific cyclin-B3	147.027	187.331	149.407	179.941	180.929	150.52	182.08	165.405	130.108	153.314	125.48	149.418	122.2	133.745	155.565	167.179	164.674	165.725	173.742	141.711	137.449	127.973	155.565	-0.0217827	(1)	-0.0126135	(1)	0.055554	(1)	0.00916924	(1)	0.0773367	(1)	0.0681675	(1)	-0.0440606	(1)	-0.147121	(1)	0.134562	(1)	-0.10306	(1)	0.178623	(1)	0.281683	(1)
LOC413666	peroxisome biogenesis factor 1-like	292.041	324.403	351.654	314.897	285.31	272.093	370.975	311.62	369.145	385.929	408.206	354.214	399.82	411.669	421.892	38.2218	333.275	278.717	341.298	377.537	381.215	45.7445	421.892	0.112745	(1)	-0.145247	(1)	0.147061	(1)	-0.257992	(1)	0.0343161	(1)	0.292308	(1)	0.0139698	(1)	0.103954	(1)	0.160257	(1)	0.0899838	(1)	0.146287	(1)	0.0563034	(1)
LOC726150	hypothetical protein LOC726150	60.4222	26.6528	36.4408	51.9061	38.2733	46.3137	55.5002	40.209	77.6616	35.2447	39.7088	44.9299	20.1689	53.1186	51.0253	43.5375	44.1734	42.2935	47.8546	56.4531	42.3193	36.6438	51.2533	0.0209198	(1)	-0.0418219	(1)	0.136399	(1)	-0.0627417	(1)	0.11548	(1)	0.178221	(1)	-0.415737	(1)	-0.623485	(1)	-0.14584	(1)	-0.207748	(1)	0.269897	(1)	0.477645	(1)
LOC726180	hypothetical protein LOC726180	0	0	1.82204	0	0	0	0	0.913841	0	0.881117	1.58835	0	2.37282	0	1.24452		0.911197		0.456926	0.445584	0.794176	1.18648	1.24452									-0.995539	(1)			0.850125	(1)	1.4292	(1)	1.49818	(1)	0.57907	(1)	0.648059	(1)	0.068989	(1)
LOC100576806	hypothetical protein LOC100576806	0	0	0	0	0	0	0	0.913841	0	0.881117	0	0	0	0	0				0.456926	0.445584
LOC726225	aldose 1-epimerase-like	178.245	175.147	142.119	123.709	240.948	86.8382	264.843	111.489	440.755	423.817	501.919	246.592	593.204	629.835	359.666	176.696	132.914	163.893	188.166	432.286	374.255	611.52	359.666	-0.410776	(1)	-0.108516	(1)	0.0907334	(1)	0.30226	(1)	0.50151	(1)	0.19925	(1)	-0.207963	(1)	0.500413	(1)	-0.265327	(1)	0.708375	(1)	-0.0573644	(1)	-0.76574	(1)
LOC100577456	fibrillin-2-like	6961.64	5860.58	3972.05	3537.4	8374.03	2417	7640.53	3226.77	14060.8	12933.9	9736.6	6890.99	16462.6	17040.6	8478.92	6411.11	3754.72	5395.52	5433.65	13497.3	8313.79	16751.6	8478.92	-0.771868	(1)	-0.248813	(1)	-0.238652	(1)	0.523055	(1)	0.533216	(1)	0.0101615	(1)	-0.699098	(1)	0.311625	(1)	-0.670724	(1)	1.01072	(0.411)	0.0283732	(1)	-0.982349	(1)
raps (LOC410315)	G-protein-signaling modulator 2	684.785	729.526	685.998	751.773	654.126	714.968	640.687	754.833	527.494	567.439	505.096	551.697	462.699	525.495	471.673	77.1555	718.885	684.547	697.76	547.466	528.396	494.971	471.673	0.0237342	(1)	-0.0468776	(1)	-0.0192969	(1)	-0.0706117	(1)	-0.043031	(1)	0.0275807	(1)	-0.0511501	(1)	-0.147976	(1)	-0.214983	(1)	-0.096826	(1)	-0.163833	(1)	-0.0670072	(1)
LOC410316	hypothetical protein LOC410316	648.531	509.45	573.031	572.697	544.525	570.238	629.003	527.286	766.53	755.117	894.242	749.179	947.94	799.625	922.189	578.997	572.864	557.381	578.145	76.8236	821.717	873.783	922.189	-0.0153471	(1)	-0.0548751	(1)	-0.00211001	(1)	-0.0395279	(1)	0.0132371	(1)	0.0527651	(1)	0.111069	(1)	0.199712	(1)	0.277501	(1)	0.0886439	(1)	0.166433	(1)	0.0777887	(1)
SK (LOC410317)	small conductance calcium-activated potassium	13.0915	4.56906	9.1102	4.32551	6.95879	6.75408	5.84213	5.48305	14.1203	7.93005	11.1185	13.5834	8.30486	16.1253	16.1788	8.83266	6.71785	6.85644	5.66259	11.2517	12.3595	12.2158	16.1788	-0.394457	(1)	-0.364998	(1)	-0.640995	(1)	0.0294593	(1)	-0.246538	(1)	-0.275997	(1)	0.163821	(1)	0.147862	(1)	0.5533	(1)	-0.0159595	(1)	0.389479	(1)	0.405438	(1)
LOC410318	otoferlin-like	0	0.76151	0	1.7302	0.869849	0	0	0	0	0	0	0	0	0.948547	1.24452	0.387548	0.865114	0.434924				0.474273	1.24452	1.18401	(1)	0.191902	(1)			-0.992104	(1)															1.3918	(1)
LOC726415	LIM/homeobox protein Lhx9-like	3.02111	3.04604	2.73306	6.05571	1.7397	4.82435	1.94738	4.56921	6.05155	2.64335	0	7.31416	4.74563	5.69128	3.73356	3.33574	4.39438	3.28221	3.25829	4.34745	3.65781	5.21846	3.73357	0.534642	(1)	0.113566	(1)	0.103097	(1)	-0.421076	(1)	-0.431545	(1)	-0.0104691	(1)	-0.249477	(1)	0.263453	(1)	-0.219618	(1)	0.512931	(1)	0.0298594	(1)	-0.483071	(1)
ap (LOC409095)	protein apterous	12.0844	20.5608	30.0637	14.7067	15.6573	13.5082	34.0791	20.1045	17.1461	26.4335	41.2972	15.6732	23.7282	25.6108	11.2007	16.3226	22.3852	14.5827	27.918	21.7898	28.4852	24.6695	11.2682	0.455673	(1)	-0.162611	(1)	0.730985	(1)	-0.618284	(1)	0.275312	(1)	0.893596	(1)	0.386559	(1)	0.179074	(1)	-0.960066	(1)	-0.207485	(1)	-1.34662	(1)	-1.13914	(1)
LOC408349	mitochondrial inner membrane protein OXA1L-like	821.742	749.325	992.1	870.292	814.179	877.066	838.346	876.374	850.243	858.208	703.64	807.693	753.369	792.985	800.226	785.534	931.196	845.622	857.36	854.226	755.666	773.177	8.22648	0.245412	(1)	0.10634	(1)	0.126228	(1)	-0.139072	(1)	-0.119184	(1)	0.0198872	(1)	-0.176868	(1)	-0.143818	(1)	-0.0942086	(1)	0.03305	(1)	0.0826592	(1)	0.0496092	(1)
LOC552791	MIP18 family protein CG7949-like	130.915	131.741	132.098	128.035	137.436	125.433	128.527	155.353	176.504	160.363	163.6	204.797	176.775	150.819	154.321	131.328	13.6645	131.435	141.94	168.433	184.198	163.797	154.325	-0.0139256	(1)	0.00117055	(1)	0.112107	(1)	0.0150961	(1)	0.126032	(1)	0.110936	(1)	0.129082	(1)	-0.0402706	(1)	-0.126249	(1)	-0.169353	(1)	-0.255331	(1)	-0.0859783	(1)
HEATR1 (LOC410319)	HEAT repeat-containing protein 1	922.445	1026.51	821.74	891.054	1103.84	898.293	822.767	873.632	832.089	805.341	783.058	934.123	834.045	818.596	853.741	974.482	856.397	11.6563	848.199	818.715	858.593	826.325	853.748	-0.186353	(1)	0.0388318	(1)	-0.200229	(1)	0.225185	(1)	-0.0138761	(1)	-0.239061	(1)	0.0686091	(1)	0.0133407	(1)	0.0604374	(1)	-0.0552684	(1)	-0.00817167	(1)	0.0470967	(1)
LOC726407	hypothetical protein LOC726407	6875.04	6791.14	4545.99	4970.87	6035.01	6313.14	4815.86	5076.39	3306.17	2924.43	3183.06	3154.49	2784.5	3274.38	4095.72	6833.92	4758.43	6174.75	4946.13	3115.3	3168.78	329.442	495.716	-0.522053	(1)	-0.146315	(1)	-0.466239	(1)	0.375737	(1)	0.0558132	(1)	-0.319924	(1)	0.0245562	(1)	-0.0403171	(1)	0.394746	(1)	-0.0648734	(1)	0.37019	(1)	0.435064	(1)
LOC100578155		4788.46	4553.83	3718.78	3602.28	4280.53	4113.24	3592.91	3392.18	2834.14	2552.6	2260.22	3068.81	2473.66	2519.34	3075.21	4671.14	366.532	4196.88	3492.54	2693.37	2664.52	2496.6	375.294	-0.351722	(1)	-0.154458	(1)	-0.419497	(1)	0.197265	(1)	-0.0677748	(1)	-0.265039	(1)	-0.0155371	(1)	-0.109505	(1)	0.191272	(1)	-0.0939678	(1)	0.206809	(1)	0.300777	(1)
LOC410320	whirlin-like	35.2463	47.2136	28.2416	52.7712	66.9784	33.7704	55.5002	42.0367	61.5241	62.5593	38.1204	39.7055	49.8292	53.1186	58.4924	41.2299	4.56387	5.37439	48.7685	62.4172	38.913	51.4739	58.4924	-0.0255428	(1)	0.288998	(1)	0.242256	(1)	0.314541	(1)	0.267799	(1)	-0.0467419	(1)	-0.672988	(1)	-0.269398	(1)	-0.0849881	(1)	0.40359	(1)	0.588	(1)	0.18441	(1)
Rgl (LOC410322)	LOW QUALITY PROTEIN: ral guanine nucleotide	802.608	728.765	894.621	737.066	779.385	625.235	912.346	753.005	1150.8	1214.18	1154.73	990.547	1187.59	1087.03	1182.29	765.686	815.844	72.3986	832.676	1182.49	172.639	1137.31	1182.29	0.0915392	(1)	-0.124646	(1)	0.121001	(1)	-0.216185	(1)	0.0294616	(1)	0.245647	(1)	-0.140665	(1)	-0.0561981	(1)	-0.000240608	(1)	0.0844666	(1)	0.140424	(1)	0.0559575	(1)
LOC408351	hypothetical protein LOC408351	1395.75	1335.69	1238.08	1346.1	1391.76	1331.52	1189.85	1343.35	1264.77	1132.24	1032.43	1157.73	943.195	1022.53	1187.27	1365.72	1292.86	1361.64	1266.6	1198.55	195.781	982.865	1187.27	-0.0799593	(1)	-0.00431795	(1)	-0.108705	(1)	0.0756413	(1)	-0.0287453	(1)	-0.104387	(1)	-0.130202	(1)	-0.286172	(1)	-0.013585	(1)	-0.15597	(1)	0.116617	(1)	0.272587	(1)
LOC726594	hypothetical protein LOC726594	2.01407	1.52302	0.91102	2.5953	1.7397	1.92974	2.92107	1.82768	1.00859	2.64335	3.1767	2.08976	1.18641	1.89709	4.97808	1.76855	1.75316	1.83472	2.37437	1.82597	2.63323	1.54175	4.97887	-0.0126049	(1)	0.0529945	(1)	0.424983	(1)	0.0655994	(1)	0.437588	(1)	0.371989	(1)	0.528171	(1)	-0.244094	(1)	1.44693	(1)	-0.772265	(1)	0.918755	(1)	1.69102	(1)
Mir124 (LOC732493)	ame-miR-124	0	0	0	0	0	0	0	0	0	0	0	0	0	0	0
DNAH7 (LOC410323)	dynein heavy chain 7, axonemal	7.04925	7.6151	3.64408	6.05571	7.82864	4.82435	4.86844	7.31073	9.07733	5.2867	4.76506	8.35904	10.6777	7.58838	11.2007	7.33218	4.84989	6.32649	6.89585	7.18216	6.5625	9.13325	11.2682	-0.596288	(1)	-0.212835	(1)	-0.267897	(1)	0.383453	(1)	0.328391	(1)	-0.0550618	(1)	-0.130242	(1)	0.346704	(1)	0.641126	(1)	0.476946	(1)	0.771368	(1)	0.294422	(1)
LOC408352	elongation factor Ts, mitochondrial-like	1109.75	946.556	1075	939.5	953.354	1070.04	1006.79	988.776	826.037	911.075	1014.96	853.667	812.69	956.135	851.252	128.155	17.2515	111.697	997.785	868.556	934.313	884.412	851.252	-0.0296343	(1)	-0.0232808	(1)	-0.0432574	(1)	0.00635341	(1)	-0.0136231	(1)	-0.0199765	(1)	0.105286	(1)	0.0261007	(1)	-0.0290328	(1)	-0.0791851	(1)	-0.134319	(1)	-0.0551335	(1)
qua (LOC410324)	villin-like protein quail	70.4925	45.6906	50.1061	32.8738	40.013	50.1732	44.7897	51.1751	58.4983	50.2237	68.2991	35.5259	66.4389	68.2954	90.85	58.9156	41.49	45.9312	47.9824	54.3615	51.9125	67.3671	9.84997	-0.485566	(1)	-0.365421	(1)	-0.275824	(1)	0.120145	(1)	0.209743	(1)	0.0895976	(1)	-0.0664892	(1)	0.309473	(1)	0.740914	(1)	0.375962	(1)	0.807403	(1)	0.431441	(1)
LOC408353	proteasome subunit beta type-7-like	3878.1	3786.23	3782.55	3507.98	3355.01	3583.52	3622.12	3747.66	3599.67	3430.19	4244.08	4047.87	3432.28	3729.69	4059.62	3832.16	3645.27	3469.27	3684.89	3514.93	4145.97	358.983	459.625	-0.072133	(1)	-0.143528	(1)	-0.0565362	(1)	-0.0713952	(1)	0.0155968	(1)	0.086992	(1)	0.238216	(1)	0.026861	(1)	0.207852	(1)	-0.211355	(1)	-0.0303638	(1)	0.180991	(1)
Cdc6 (LOC552763)	cell division control protein 6 homolog	90.6333	92.1427	83.8138	101.217	91.3341	91.6626	88.6056	84.9872	79.6788	74.0138	65.1224	78.366	54.5748	85.3692	93.339	91.388	92.5153	91.4983	86.7964	76.8463	71.7442	69.9722	93.3391	0.017688	(1)	0.00174136	(1)	-0.0743685	(1)	-0.0159466	(1)	-0.0920565	(1)	-0.0761099	(1)	-0.099113	(1)	-0.135198	(1)	0.280504	(1)	-0.036085	(1)	0.379617	(1)	0.415702	(1)
Rpl41 (LOC100191002)	ribosomal protein L41	4852.91	4131.19	4261.75	4467.38	4267.48	4832.06	4493.57	4190.88	2860.37	2957.03	4938.19	3684.25	3333.81	3392	3882.9	4492.5	4364.57	4549.77	4342.22	298.698	4311.22	3362.96	3882.93	-0.0415355	(1)	0.0184203	(1)	-0.0489397	(1)	0.0599558	(1)	-0.00740416	(1)	-0.06736	(1)	0.567722	(0.442)	0.209335	(1)	0.416762	(1)	-0.358387	(1)	-0.15096	(1)	0.207427	(1)
LOC100577644	uncharacterized protein C7orf30-like	20.1407	21.3223	28.2416	36.3342	36.5337	33.7704	32.1317	31.9844	33.2835	44.937	38.1204	42.8401	41.5243	35.0962	26.1349	2.7315	32.2879	35.1523	32.5878	39.1125	4.48272	38.3126	26.1349	0.63917	(1)	0.761784	(1)	0.628864	(1)	0.122613	(1)	-0.0103069	(1)	-0.13292	(1)	0.0496722	(1)	-0.0298159	(1)	-0.581568	(1)	-0.079488	(1)	-0.63124	(1)	-0.551752	(1)
LOC726695	hypothetical protein LOC726695	1229.59	1355.49	1040.38	1074.46	1206.48	1079.69	1104.16	1256.53	625.327	716.348	648.048	727.237	471.004	520.752	557.545	1292.54	157.42	1143.84	118.348	67.8376	687.642	495.878	557.545	-0.28966	(1)	-0.177276	(1)	-0.130997	(1)	0.112383	(1)	0.158663	(1)	0.0462792	(1)	0.0356945	(1)	-0.435978	(1)	-0.266875	(1)	-0.471672	(0.755)	-0.30257	(1)	0.169103	(1)
LOC552753	hypothetical protein LOC552753	203.421	239.114	214.09	226.656	209.634	248.936	195.711	213.839	151.289	187.678	139.775	177.63	156.606	156.51	148.098	221.268	22.3735	229.285	24.7759	169.483	158.723	156.559	148.979	-0.00584498	(1)	0.0513485	(1)	-0.111753	(1)	0.0571935	(1)	-0.105908	(1)	-0.163101	(1)	-0.0948204	(1)	-0.114446	(1)	-0.194592	(1)	-0.0196254	(1)	-0.099772	(1)	-0.0801467	(1)
LOC412277	mRNA cap guanine-N7 methyltransferase-like	519.631	594.739	690.553	651.421	684.571	622.341	590.055	750.264	614.233	627.355	692.521	723.057	675.066	631.732	691.953	557.185	67.9875	653.456	67.1594	62.7939	77.7893	653.399	691.953	0.268129	(1)	0.229933	(1)	0.266348	(1)	-0.0381952	(1)	-0.00178063	(1)	0.0364146	(1)	0.189206	(1)	0.0738504	(1)	0.15656	(1)	-0.115355	(1)	-0.0326455	(1)	0.0827096	(1)
Top1 (LOC412750)	DNA topoisomerase 1 (>1 isoforms)	968.769	1143.03	901.91	1067.53	1122.11	946.537	1000.95	1125.85	1024.73	1048.53	776.704	1064.73	868.451	768.323	747.957	155.897	984.723	134.328	163.42	136.629	92.7186	818.387	747.957	-0.100681	(1)	-0.0297861	(1)	0.0102173	(1)	0.0708951	(1)	0.110898	(1)	0.0400034	(1)	-0.171068	(1)	-0.341045	(1)	-0.470874	(1)	-0.169977	(1)	-0.299806	(1)	-0.129829	(1)
LOC409396	hypothetical protein LOC409396 isoform 1	953.663	1018.9	816.274	848.664	983.799	807.595	1030.16	827.94	1201.23	1212.42	1030.84	1041.75	1250.47	1198.96	1223.36	986.282	832.469	895.697	929.512	126.826	136.294	1224.72	1223.36	-0.244603	(1)	-0.138989	(1)	-0.0862417	(1)	0.105615	(1)	0.158362	(1)	0.052747	(1)	-0.219784	(1)	0.021234	(1)	0.0196364	(1)	0.241018	(1)	0.239421	(1)	-0.00159763	(1)
LOC552729	neuroguidin-A-like	705.933	855.175	698.752	758.694	738.502	749.703	721.503	763.057	703.997	738.376	536.863	746.045	647.779	641.218	704.398	78.554	728.723	744.125	742.282	721.187	641.454	644.498	74.3984	-0.099128	(1)	-0.068997	(1)	-0.0725344	(1)	0.030131	(1)	0.0265937	(1)	-0.00353737	(1)	-0.169027	(1)	-0.162196	(1)	-0.033981	(1)	0.00683129	(1)	0.135046	(1)	0.128215	(1)
LOC552723	transmembrane 9 superfamily member 4-like	2404.8	2382.76	2232	2104.79	2440.8	2257.79	2118.75	2266.33	1697.46	1793.07	1483.52	1761.67	1356.06	1538.54	1616.63	2393.78	2168.39	2349.29	2192.54	1745.27	1622.59	1447.34	1616.63	-0.142665	(1)	-0.0270648	(1)	-0.126692	(1)	0.1156	(1)	0.0159732	(1)	-0.0996272	(1)	-0.105145	(1)	-0.27008	(1)	-0.110456	(1)	-0.164935	(1)	-0.00531148	(1)	0.159623	(1)
LOC552716	metallophosphoesterase 1-like	324.266	383.801	459.154	413.518	417.527	433.226	390.449	461.49	398.394	384.167	387.558	504.677	410.497	395.544	439.316	354.333	436.336	425.377	425.969	391.284	446.118	43.2672	439.316	0.301555	(1)	0.264856	(1)	0.266865	(1)	-0.0366985	(1)	-0.0346901	(1)	0.00200838	(1)	0.189221	(1)	0.0426509	(1)	0.167055	(1)	-0.14657	(1)	-0.0221661	(1)	0.124404	(1)
LOC410325	trifunctional enzyme subunit alpha,	1871.07	1949.46	2027.93	1905.82	2052.84	2113.06	1966.85	1922.72	1643	1764	1693.18	1872.43	1532.84	1758.61	1625.34	191.269	1966.87	282.953	1944.79	173.496	1782.84	1645.72	1625.34	0.0421284	(1)	0.124855	(1)	0.0258356	(1)	0.0827261	(1)	-0.0162928	(1)	-0.0990189	(1)	0.0656496	(1)	-0.0497775	(1)	-0.0677543	(1)	-0.115427	(1)	-0.133404	(1)	-0.0179768	(1)
LOC410326	hypothetical protein LOC410326	1339.36	690.689	1068.63	1109.92	901.163	1137.58	1041.85	768.54	1418.08	2057.41	1467.64	1590.31	1237.42	1187.58	1657.7	115.238	189.275	119.372	95.1935	1737.74	1528.97	1212.52	1657.79	0.101855	(1)	0.00616703	(1)	-0.165216	(1)	-0.0956881	(1)	-0.267071	(1)	-0.171383	(1)	-0.184653	(1)	-0.519228	(1)	-0.0680321	(1)	-0.334575	(1)	0.116621	(1)	0.451196	(1)
LOC100577801	zinc finger protein ush-like	916.403	858.221	900.998	925.658	832.445	883.82	1055.48	793.214	871.424	887.285	954.6	812.917	913.534	915.348	833.829	887.312	913.328	858.133	924.346	879.354	883.758	914.442	833.829	0.0416917	(1)	-0.0482411	(1)	0.0589913	(1)	-0.0899328	(1)	0.0172997	(1)	0.107232	(1)	0.00720741	(1)	0.0564459	(1)	-0.0766936	(1)	0.0492385	(1)	-0.083901	(1)	-0.13314	(1)
LOC100576483		57.4011	67.0128	78.3477	51.041	61.7593	47.2786	63.2897	56.6581	51.4382	62.5593	71.4758	63.7377	69.9981	65.4497	56.0034	62.2697	64.6943	54.5189	59.9739	56.9987	67.6677	67.7239	56.3484	0.0565632	(1)	-0.190319	(1)	-0.0527401	(1)	-0.246882	(1)	-0.109303	(1)	0.137579	(1)	0.246237	(1)	0.248735	(1)	-0.0254156	(1)	0.00249761	(1)	-0.271653	(1)	-0.274151	(1)
LOC726800	protein SLC7A6OS-like	277.942	290.897	307.014	272.507	279.221	304.899	301.843	276.894	350.99	338.349	422.502	408.548	357.109	360.448	352.199	284.419	289.762	292.647	289.369	344.669	415.525	358.778	352.199	0.0268399	(1)	0.0382453	(1)	0.0248888	(1)	0.0114054	(1)	-0.00195109	(1)	-0.0133565	(1)	0.269721	(1)	0.0578793	(1)	0.0311781	(1)	-0.211842	(1)	-0.238543	(1)	-0.0267012	(1)
LOC410328	zinc finger protein 341-like	956.685	1016.62	917.397	887.594	776.775	871.277	949.346	927.549	802.839	760.404	881.535	816.052	728.455	767.374	770.358	986.65	92.4952	824.259	938.447	781.622	848.793	747.915	77.358	-0.128619	(1)	-0.259849	(1)	-0.0722624	(1)	-0.13123	(1)	0.0563566	(1)	0.187586	(1)	0.118943	(1)	-0.0635969	(1)	-0.0209413	(1)	-0.18254	(1)	-0.139885	(1)	0.0426555	(1)
LOC100577845	membrane metallo-endopeptidase-like 1-like	144.006	150.779	189.492	179.076	135.696	183.325	162.606	173.63	143.22	165.65	114.361	135.834	138.81	141.333	187.923	147.393	184.285	159.518	168.118	154.435	125.979	14.7163	187.923	0.322267	(1)	0.11399	(1)	0.18981	(1)	-0.208277	(1)	-0.132458	(1)	0.0758194	(1)	-0.303943	(1)	-0.140835	(1)	0.283138	(1)	0.163107	(1)	0.587081	(1)	0.423973	(1)
LOC410330	phosphatidylserine synthase 1-like	1000.99	1007.48	920.13	1018.22	911.602	943.642	915.267	982.379	636.422	643.215	635.341	786.795	554.053	588.099	688.22	14.2358	969.177	927.622	948.823	639.818	711.679	571.759	688.22	-0.051266	(1)	-0.114489	(1)	-0.0818868	(1)	-0.0632234	(1)	-0.0306208	(1)	0.0326025	(1)	0.152325	(1)	-0.16398	(1)	0.105206	(1)	-0.316305	(1)	-0.0471181	(1)	0.269187	(1)
LOC410331		325.273	402.839	300.637	358.152	365.337	325.161	314.501	409.401	306.612	358.615	276.373	311.374	272.874	293.101	277.528	364.557	329.394	345.249	361.952	332.613	293.874	282.987	277.528	-0.144344	(1)	-0.0765232	(1)	-0.00836436	(1)	0.0678209	(1)	0.13598	(1)	0.0681588	(1)	-0.178649	(1)	-0.233108	(1)	-0.261213	(1)	-0.0544586	(1)	-0.0825634	(1)	-0.0281048	(1)
LOC552651	hypothetical protein LOC552651	414.899	404.362	291.526	315.762	536.697	332.88	358.317	385.641	515.391	642.334	543.216	518.261	601.509	508.421	416.914	49.6334	33.645	434.788	371.979	578.862	53.7385	554.966	416.914	-0.431941	(1)	0.0859906	(1)	-0.139101	(1)	0.517932	(1)	0.29284	(1)	-0.225091	(1)	-0.125219	(1)	-0.0608235	(1)	-0.47347	(1)	0.0643957	(1)	-0.348251	(1)	-0.412646	(1)
LOC100576716	hypothetical protein LOC100576716	1.00704	0.76151	3.64408	3.4604	8.69849	0.964869	0.973688	0.913841	6.05155	8.81117	1.58835	7.31416	4.74563	6.63983	3.73356	0.884273	3.55224	4.83168	0.943765	7.43137	4.45126	5.69274	3.73357	2.00617	(1)	2.44996	(1)	0.0939354	(1)	0.443795	(1)	-1.91223	(1)	-2.35603	(1)	-0.739414	(1)	-0.384506	(1)	-0.993074	(1)	0.354908	(1)	-0.253661	(1)	-0.608569	(1)
NFAT (LOC408354)	hypothetical protein LOC408354	3821.7	3833.44	3428.17	3338.42	3583.78	3441.69	3589.99	3097.92	3549.24	3950.93	2120.45	2761.62	2938.73	2949.98	2751.63	3827.57	3383.3	3512.73	3343.96	375.82	2441.34	2944.36	2751.63	-0.178	(1)	-0.123836	(1)	-0.194874	(1)	0.0541643	(1)	-0.0168739	(1)	-0.0710382	(1)	-0.61943	(0.269)	-0.348969	(1)	-0.446633	(1)	0.27046	(1)	0.172796	(1)	-0.097664	(1)
LOC408355	beta-lactamase-like protein 2 homolog	925.466	932.849	1047.67	1019.09	989.018	1046.88	929.872	1014.36	1002.54	1168.36	1362.81	1360.43	1156.75	1173.35	1251.99	929.158	133.388	117.955	972.118	185.459	1361.62	1165.53	1251.99	0.153376	(1)	0.131672	(1)	0.0652077	(1)	-0.0217046	(1)	-0.0881687	(1)	-0.0664641	(1)	0.32703	(1)	0.102098	(1)	0.205926	(1)	-0.224932	(1)	-0.121104	(1)	0.103828	(1)
LOC410332	breast cancer anti-estrogen resistance protein	2050.33	1964.69	2091.7	1808.93	1877.13	2087.98	2279.4	2024.16	3832.65	3207.27	4193.25	3156.58	4230.73	3059.06	3984.95	27.5147	195.314	1982.56	2151.78	3519.96	3674.92	3644.9	3984.95	-0.0417013	(1)	-0.0180465	(1)	0.100124	(1)	0.0236548	(1)	0.141825	(1)	0.11817	(1)	0.0621533	(1)	0.0503203	(1)	0.179005	(1)	-0.011833	(1)	0.116851	(1)	0.128685	(1)
LOC726896	hypothetical protein LOC726896	26.1829	25.8913	20.0424	16.4369	27.8352	27.9812	39.9212	13.7076	25.2148	31.7202	25.4136	30.3015	37.9651	41.7361	31.113	26.3714	18.2397	27.9818	26.8144	28.4676	27.8576	39.8557	31.1135	-0.513491	(1)	0.100117	(1)	0.0424382	(1)	0.613608	(1)	0.555929	(1)	-0.0576791	(1)	-0.0312461	(1)	0.485284	(1)	0.128202	(1)	0.51653	(1)	0.159448	(1)	-0.357082	(1)
LOC100576845		69.4855	51.0211	53.7502	56.2316	84.3753	48.2435	24.3422	24.6737	77.6616	92.5173	115.95	123.296	105.59	87.2663	119.474	6.25333	54.9986	66.3939	24.5796	85.8944	119.623	96.4283	119.474	-0.131849	(1)	0.138172	(1)	-1.29779	(1)	0.270021	(1)	-1.16594	(1)	-1.43596	(0.301)	0.49144	(1)	0.180477	(1)	0.489644	(1)	-0.310963	(1)	-0.00179634	(1)	0.309167	(1)
LOC726903	hypothetical protein LOC726903	43.3026	48.7366	79.2587	76.994	40.013	61.7516	73.0266	54.8305	108.928	57.2726	84.1827	70.007	68.8117	105.289	140.631	46.1959	78.1264	5.88233	63.9285	83.1277	77.9482	87.5195	14.6378	0.763561	(1)	0.144917	(1)	0.474212	(1)	-0.618644	(1)	-0.289349	(1)	0.329296	(1)	-0.108219	(1)	0.0669942	(1)	0.758987	(1)	0.175214	(1)	0.867207	(1)	0.691993	(1)
LOC726913	fatty acid desaturase 1-like	523.659	380.755	399.938	416.114	566.272	462.172	387.528	333.552	537.58	518.097	405.03	470.196	539.816	438.229	608.57	452.269	48.2562	514.222	36.54	527.838	437.613	489.222	68.5737	-0.148323	(1)	0.185408	(1)	-0.326824	(1)	0.333731	(1)	-0.1785	(1)	-0.512232	(1)	-0.27044	(1)	-0.110196	(1)	0.205328	(1)	0.160245	(1)	0.475769	(1)	0.315524	(1)
LOC100576869	hypothetical protein LOC100576869	28.197	22.8453	12.7543	30.2785	43.4924	27.0163	23.3685	16.4491	31.2664	29.958	28.5903	20.8976	23.7282	31.302	31.113	25.5212	21.5165	35.2544	19.9884	3.61217	24.744	27.5152	31.1135	-0.246256	(1)	0.466109	(1)	-0.358285	(1)	0.712366	(1)	-0.112029	(1)	-0.824394	(1)	-0.307028	(1)	-0.153881	(1)	0.0234126	(1)	0.153147	(1)	0.330441	(1)	0.177294	(1)
LOC552577	junctophilin-1-like (>1 isoforms)	956.685	927.519	789.854	816.655	993.367	710.144	990.241	619.584	1821.52	1638	1523.23	1272.66	2028.76	1575.54	2014.88	942.117	83.2547	851.755	84.9127	1729.76	1397.95	182.147	214.878	-0.230025	(1)	-0.145443	(1)	-0.22705	(1)	0.0845818	(1)	0.00297472	(1)	-0.0816071	(1)	-0.30726	(1)	0.0591477	(1)	0.220123	(1)	0.366407	(1)	0.527383	(1)	0.160976	(1)
LOC408358	hypothetical protein LOC408358	1725.05	1487.23	1346.49	1674.84	1624.88	1241.79	1394.32	1221.81	1302.09	1353.4	511.449	764.852	677.439	788.242	725.555	166.148	151.661	1433.33	138.637	1327.74	638.159	732.848	725.555	-0.0884181	(1)	-0.164226	(1)	-0.296166	(1)	-0.0758074	(1)	-0.207748	(1)	-0.13194	(1)	-1.05701	(0.004)	-0.857405	(0.050)	-0.87182	(0.326)	0.199602	(1)	0.185188	(1)	-0.0144143	(1)
LOC410334	hypothetical protein LOC410334	1.00704	2.28453	0.91102	1.7302	2.60955	2.89461	0	5.48305	4.03437	0	4.76506	2.08976	1.18641	2.84564	1.24452	1.64578	1.32619	2.75277	2.74152	2.17184	3.42748	2.16245	1.24452	-0.317568	(1)	0.741747	(1)	0.736204	(1)	1.05932	(1)	1.05377	(1)	-0.00554299	(1)	0.764775	(1)	-0.000829795	(1)	-0.696753	(1)	-0.765605	(1)	-1.46153	(1)	-0.695924	(1)
mei-W68 (LOC726963)	meiotic recombination protein SPO11	1.00704	0.76151	0	0	3.4794	0	3.89475	3.65536	1.00859	0	1.58835	1.04488	1.18641	3.79419	2.48904	0.884273		1.7397	3.77559	0.542961	1.31662	2.49298	2.48944			0.976273	(1)	2.09394	(1)					1.11766	(1)	1.38449	(1)	2.30398	(1)	2.30325	(1)	0.919484	(1)	0.918755	(1)	-0.000728742	(1)
LOC410336	dipeptidyl aminopeptidase-like protein 6-like	320.238	352.579	281.505	274.237	336.632	205.517	418.686	289.688	718.118	591.229	902.184	551.697	710.659	460.994	553.811	336.483	277.872	271.743	354.187	654.674	726.944	585.826	553.811	-0.275798	(1)	-0.311525	(1)	0.0742974	(1)	-0.0357272	(1)	0.350095	(1)	0.385822	(1)	0.151061	(1)	-0.160303	(1)	-0.241381	(1)	-0.311364	(1)	-0.392442	(1)	-0.0810777	(1)
LOC410337	venom dipeptidyl peptidase 4	24182	20831.1	16996	18800.4	16089.6	17706.3	21424.1	18608.5	11157	12017.6	11410.7	11973.3	10522.3	10769.8	10040.8	2256.53	17898.2	16898	216.365	11587.3	11692.3	1646.29	14.7889	-0.330531	(1)	-0.413495	(1)	-0.169168	(1)	-0.0829644	(1)	0.161363	(1)	0.244327	(1)	0.0129776	(1)	-0.122229	(1)	-0.206672	(1)	-0.135207	(1)	-0.219649	(1)	-0.0844427	(1)
vari (LOC408359)	MAGUK p55 subfamily member 6	573.004	576.463	622.226	546.744	466.239	539.362	656.266	577.548	802.839	590.348	822.766	575.729	842.35	730.381	677.019	574.733	584.485	52.8386	616.968	696.594	699.248	786.366	677.19	0.0242739	(1)	-0.192907	(1)	0.10216	(1)	-0.217181	(1)	0.0778861	(1)	0.295067	(1)	0.00548589	(1)	0.174882	(1)	-0.0411214	(1)	0.169396	(1)	-0.0466073	(1)	-0.216004	(1)
LOC410338	endoplasmic reticulum-Golgi intermediate	220.541	250.537	237.776	256.935	228.77	247.971	233.685	248.565	228.95	245.832	247.783	240.322	206.435	207.732	237.703	235.539	247.356	238.378	241.125	237.391	244.527	27.8341	237.734	0.0706216	(1)	0.0172426	(1)	0.0338164	(1)	-0.0533789	(1)	-0.0368052	(1)	0.0165737	(1)	0.0399274	(1)	-0.197053	(1)	0.00189692	(1)	-0.236981	(1)	-0.0380304	(1)	0.19895	(1)
LOC727012	reactive oxygen species modulator 1-like isoform	1342.38	1168.92	1361.06	1167.89	1230.84	1345.99	1276.51	1180.68	1285.96	1225.63	1550.23	1229.82	1300.3	1320.38	1271.9	1255.65	1264.47	1288.41	1228.59	1255.79	139.279	131.344	1271.9	0.0101059	(1)	0.0371639	(1)	-0.0314242	(1)	0.0270581	(1)	-0.0415301	(1)	-0.0685881	(1)	0.146514	(1)	0.0613415	(1)	0.0183846	(1)	-0.0851722	(1)	-0.128129	(1)	-0.0429568	(1)
LOC410339	mTERF domain-containing protein 1,	342.392	397.508	469.175	468.885	537.567	524.889	479.055	538.252	473.03	494.307	419.325	514.081	431.853	491.347	416.914	369.952	469.3	531.228	58.6536	483.668	466.734	461.6	416.914	0.342349	(1)	0.521999	(1)	0.459352	(1)	0.17965	(1)	0.117003	(1)	-0.0626469	(1)	-0.0515127	(1)	-0.0673744	(1)	-0.214267	(1)	-0.0158617	(1)	-0.162754	(1)	-0.146892	(1)
LOC552460	transmembrane protein 18-like	766.355	777.501	760.701	769.075	743.721	732.336	748.766	725.59	751.401	851.159	1041.96	1026.07	880.315	808.162	944.591	771.928	764.888	738.282	737.178	81.2842	134.157	844.238	944.598	-0.0132175	(1)	-0.0647904	(1)	-0.0664531	(1)	-0.0515729	(1)	-0.0532355	(1)	-0.00166268	(1)	0.36788	(1)	0.075344	(1)	0.237383	(1)	-0.292536	(1)	-0.130497	(1)	0.162039	(1)
LOC552447	clavesin-2-like	15028	12745.4	12320.6	12249	11040.1	14768.3	9220.83	11723.7	2880.54	2661.85	2673.2	2602.8	2512.81	2742.25	2776.52	13886.7	12284.8	1294.23	1472.25	2771.2	2638	2627.54	2776.52	-0.176829	(1)	-0.105862	(1)	-0.407132	(1)	0.070967	(1)	-0.230303	(1)	-0.30127	(1)	-0.0710663	(1)	-0.0768013	(1)	0.00277103	(1)	-0.005735	(1)	0.0738374	(1)	0.0795724	(1)
LOC727007	clavesin-1-like	7594.06	6608.38	7001.19	6661.28	5844.51	6576.55	5636.68	6301.85	2869.44	2340.25	2398.41	2296.65	2397.73	2870.3	2394.46	711.221	6831.23	621.539	5969.27	264.846	2347.53	2634.18	2394.46	-0.0559213	(1)	-0.193351	(1)	-0.250514	(1)	-0.137429	(1)	-0.194592	(1)	-0.0571632	(1)	-0.150055	(1)	0.0160668	(1)	-0.121499	(1)	0.166122	(1)	0.0285553	(1)	-0.137566	(1)
LOC408361	alpha-tocopherol transfer protein-like isoform	1036.24	1210.8	972.058	1032.93	1276.07	774.79	1270.66	895.564	1189.13	1254.71	1238.91	782.615	1889.95	1467.4	962.014	1123.52	12.4943	125.429	183.114	1221.92	11.765	1678.68	962.141	-0.164432	(1)	-0.131799	(1)	-0.0528414	(1)	0.0326336	(1)	0.111591	(1)	0.0789572	(1)	-0.273703	(1)	0.458173	(1)	-0.34502	(1)	0.731876	(0.613)	-0.0713176	(1)	-0.803193	(1)
LOC100578120	hypothetical protein LOC100578120	118.83	186.57	90.191	125.44	196.586	69.4706	223.948	84.0734	194.658	229.972	184.249	148.373	389.142	262.747	176.722	152.776	17.8153	133.282	154.186	212.315	166.319	325.945	176.722	-0.502139	(1)	-0.198969	(1)	0.0123313	(1)	0.30317	(1)	0.51447	(1)	0.2113	(1)	-0.352323	(1)	0.618422	(1)	-0.264725	(1)	0.970744	(1)	0.0875976	(1)	-0.883147	(1)
LOC100577494		12.0844	22.8453	13.6653	23.3577	7.82864	6.75408	8.7632	8.22457	9.07733	20.2657	25.4136	8.35904	23.7282	25.6108	13.6897	17.4649	18.5115	7.29136	8.49388	14.6716	16.8863	24.6695	13.6897	0.0839674	(1)	-1.2602	(1)	-1.03996	(1)	-1.34416	(1)	-1.12393	(1)	0.220236	(1)	0.202839	(1)	0.749709	(1)	-0.0999241	(1)	0.54687	(1)	-0.302763	(1)	-0.849633	(1)
[truncated: 9,007 more rows]
